# Supplementary material for: Design of a self-stable and population-controllable co-culture system in E. coli and its applications
Source: Research Square preprint supplement (doi:10.21203/rs.3.rs-1429863/v1), 2022-03-16
Supplement: Supplementary file 1 [file 10eca12b692c0a68f63ff4ff.xlsx]

## Sheet: Fig.2 A2
Time	OD600	OD600	OD600	OD600	OD600	OD600	OD600	OD600	OD600
h
Time	μm2=0.2	μm2=0.4	μm2=0.6	μm2=0.8	μm2=1.0	μm2=1.2	μm2=1.4	μm2=1.6	μm2=1.8
0.01	1.2054	1.20649	1.20758	1.20867	1.20976	1.21085	1.21195	1.21304	1.21413
0.02	1.21084	1.21302	1.21521	1.21741	1.21961	1.22181	1.22402	1.22623	1.22844
0.03	1.21631	1.2196	1.2229	1.22621	1.22953	1.23286	1.23621	1.23957	1.24294
0.04	1.22182	1.22621	1.23063	1.23507	1.23953	1.24402	1.24853	1.25307	1.25763
0.05	1.22737	1.23287	1.23841	1.24399	1.24962	1.25528	1.26099	1.26673	1.27252
0.06	1.23295	1.23957	1.24625	1.25299	1.25979	1.26665	1.27357	1.28055	1.2876
0.07	1.23857	1.24631	1.25413	1.26204	1.27003	1.27812	1.28628	1.29454	1.30288
0.08	1.24423	1.2531	1.26207	1.27116	1.28037	1.28969	1.29913	1.30869	1.31837
0.09	1.24993	1.25992	1.27006	1.28035	1.29078	1.30137	1.31211	1.32301	1.33406
0.1	1.25567	1.2668	1.27811	1.2896	1.30129	1.31316	1.32523	1.33749	1.34995
0.11	1.26144	1.27371	1.2862	1.29892	1.31187	1.32506	1.33848	1.35215	1.36606
0.12	1.26726	1.28067	1.29435	1.30831	1.32255	1.33707	1.35187	1.36698	1.38238
0.13	1.27311	1.28768	1.30256	1.31776	1.3333	1.34918	1.36541	1.38199	1.39892
0.14	1.27901	1.29472	1.31082	1.32729	1.34415	1.36141	1.37908	1.39717	1.41568
0.15	1.28494	1.30182	1.31913	1.33688	1.35509	1.37376	1.3929	1.41253	1.43266
0.16	1.29092	1.30896	1.3275	1.34654	1.36611	1.38621	1.40687	1.42808	1.44987
0.17	1.29693	1.31614	1.33592	1.35627	1.37722	1.39879	1.42098	1.44381	1.46731
0.18	1.30299	1.32337	1.3444	1.36607	1.38843	1.41147	1.43523	1.45973	1.48498
0.19	1.30908	1.33065	1.35293	1.37595	1.39972	1.42428	1.44964	1.47583	1.50289
0.2	1.31522	1.33797	1.36152	1.38589	1.41111	1.4372	1.4642	1.49213	1.52103
0.21	1.3214	1.34535	1.37017	1.39591	1.42259	1.45024	1.47891	1.50863	1.53942
0.22	1.32763	1.35276	1.37887	1.40599	1.43416	1.46341	1.49378	1.52531	1.55806
0.23	1.33389	1.36023	1.38764	1.41615	1.44582	1.47669	1.5088	1.5422	1.57694
0.24	1.3402	1.36774	1.39646	1.42639	1.45758	1.4901	1.52398	1.55929	1.59608
0.25	1.34655	1.37531	1.40534	1.4367	1.46944	1.50363	1.53932	1.57658	1.61548
0.26	1.35294	1.38292	1.41427	1.44708	1.48139	1.51729	1.55482	1.59408	1.63513
0.27	1.35938	1.39058	1.42327	1.45754	1.49344	1.53107	1.57049	1.61179	1.65505
0.28	1.36587	1.39828	1.43233	1.46807	1.50559	1.54498	1.58632	1.62971	1.67524
0.29	1.37239	1.40604	1.44144	1.47868	1.51784	1.55902	1.60232	1.64784	1.6957
0.3	1.37896	1.41385	1.45062	1.48936	1.53018	1.57318	1.61848	1.66619	1.71644
0.31	1.38558	1.42171	1.45986	1.50012	1.54263	1.58748	1.63482	1.68477	1.73746
0.32	1.39224	1.42962	1.46916	1.51096	1.55517	1.60191	1.65133	1.70356	1.75876
0.33	1.39895	1.43758	1.47852	1.52188	1.56782	1.61648	1.66801	1.72258	1.78035
0.34	1.4057	1.44559	1.48794	1.53288	1.58057	1.63118	1.68487	1.74182	1.80223
0.35	1.4125	1.45366	1.49742	1.54396	1.59343	1.64601	1.7019	1.7613	1.82441
0.36	1.41935	1.46177	1.50697	1.55511	1.60638	1.66098	1.71912	1.78101	1.84689
0.37	1.42624	1.46994	1.51658	1.56635	1.61945	1.67609	1.73652	1.80096	1.86968
0.38	1.43319	1.47816	1.52626	1.57767	1.63262	1.69134	1.7541	1.82115	1.89277
0.39	1.44017	1.48644	1.53599	1.58907	1.64589	1.70674	1.77187	1.84158	1.91618
0.4	1.44721	1.49477	1.5458	1.60055	1.65928	1.72227	1.78982	1.86225	1.93991
0.41	1.4543	1.50315	1.55567	1.61211	1.67277	1.73795	1.80797	1.88318	1.96395
0.42	1.46143	1.51159	1.5656	1.62376	1.68637	1.75377	1.8263	1.90436	1.98833
0.43	1.46862	1.52008	1.5756	1.63549	1.70008	1.76974	1.84484	1.92579	2.01304
0.44	1.47585	1.52863	1.58567	1.64731	1.71391	1.78585	1.86356	1.94748	2.03809
0.45	1.48314	1.53723	1.5958	1.65921	1.72784	1.80212	1.88249	1.96943	2.06347
0.46	1.49047	1.54589	1.606	1.6712	1.74189	1.81854	1.90161	1.99165	2.08921
0.47	1.49785	1.5546	1.61627	1.68327	1.75605	1.8351	1.92094	2.01414	2.1153
0.48	1.50529	1.56337	1.62661	1.69543	1.77033	1.85183	1.94048	2.0369	2.14174
0.49	1.51278	1.5722	1.63701	1.70768	1.78472	1.8687	1.96022	2.05993	2.16855
0.5	1.52032	1.58109	1.64749	1.72002	1.79923	1.88573	1.98017	2.08324	2.19572
0.51	1.52791	1.59003	1.65803	1.73244	1.81386	1.90292	2.00033	2.10683	2.22326
0.52	1.53555	1.59903	1.66864	1.74496	1.82861	1.92027	2.0207	2.13071	2.25119
0.53	1.54325	1.6081	1.67933	1.75756	1.84347	1.93778	2.0413	2.15488	2.2795
0.54	1.551	1.61722	1.69008	1.77026	1.85846	1.95545	2.06211	2.17934	2.30819
0.55	1.55881	1.6264	1.70091	1.78305	1.87356	1.97329	2.08314	2.2041	2.33728
0.56	1.56667	1.63564	1.71181	1.79593	1.88879	1.99129	2.10439	2.22916	2.36677
0.57	1.57458	1.64494	1.72278	1.8089	1.90415	2.00946	2.12587	2.25452	2.39667
0.58	1.58255	1.6543	1.73383	1.82197	1.91962	2.02779	2.14758	2.2802	2.42698
0.59	1.59057	1.66372	1.74495	1.83513	1.93522	2.0463	2.16952	2.30618	2.4577
0.6	1.59865	1.6732	1.75614	1.84838	1.95095	2.06497	2.19169	2.33248	2.48885
0.61	1.60679	1.68275	1.76741	1.86173	1.96681	2.08382	2.2141	2.3591	2.52043
0.62	1.61498	1.69236	1.77875	1.87518	1.98279	2.10285	2.23674	2.38604	2.55245
0.63	1.62323	1.70203	1.79017	1.88872	1.99891	2.12205	2.25963	2.41331	2.58491
0.64	1.63154	1.71177	1.80166	1.90237	2.01515	2.14143	2.28276	2.44091	2.61781
0.65	1.63991	1.72156	1.81323	1.91611	2.03153	2.16098	2.30614	2.46885	2.65117
0.66	1.64833	1.73143	1.82488	1.92994	2.04803	2.18072	2.32977	2.49713	2.685
0.67	1.65682	1.74136	1.8366	1.94388	2.06468	2.20064	2.35364	2.52575	2.71929
0.68	1.66536	1.75135	1.84841	1.95792	2.08145	2.22075	2.37778	2.55473	2.75406
0.69	1.67396	1.76141	1.86029	1.97206	2.09836	2.24104	2.40216	2.58405	2.78931
0.7	1.68262	1.77154	1.87225	1.9863	2.11541	2.26152	2.42681	2.61374	2.82504
0.71	1.69135	1.78173	1.88429	2.00065	2.1326	2.28219	2.45173	2.64378	2.86128
0.72	1.70013	1.79199	1.89641	2.01509	2.14992	2.30305	2.4769	2.6742	2.89801
0.73	1.70898	1.80231	1.90862	2.02964	2.16739	2.32411	2.50235	2.70498	2.93526
0.74	1.71789	1.81271	1.9209	2.0443	2.185	2.34536	2.52806	2.73615	2.97303
0.75	1.72686	1.82317	1.93327	2.05906	2.20275	2.36681	2.55406	2.76769	3.01132
0.76	1.73589	1.83371	1.94571	2.07393	2.22064	2.38845	2.58032	2.79962	3.05014
0.77	1.74499	1.84431	1.95825	2.0889	2.23868	2.4103	2.60687	2.83194	3.0895
0.78	1.75415	1.85498	1.97086	2.10398	2.25686	2.43235	2.63371	2.86465	3.12941
0.79	1.76337	1.86572	1.98356	2.11917	2.27519	2.4546	2.66083	2.89777	3.16988
0.8	1.77266	1.87654	1.99635	2.13447	2.29367	2.47706	2.68823	2.93129	3.21091
0.81	1.78202	1.88742	2.00921	2.14988	2.31229	2.49972	2.71593	2.96523	3.25252
0.82	1.79144	1.89838	2.02217	2.1654	2.33107	2.5226	2.74393	2.99958	3.2947
0.83	1.80093	1.90941	2.03521	2.18104	2.35	2.54569	2.77223	3.03435	3.33747
0.84	1.81048	1.92051	2.04834	2.19678	2.36908	2.56899	2.80083	3.06954	3.38084
0.85	1.8201	1.93169	2.06156	2.21264	2.38832	2.59251	2.82973	3.10517	3.42482
0.86	1.82979	1.94294	2.07487	2.22861	2.40771	2.61625	2.85894	3.14124	3.46941
0.87	1.83955	1.95427	2.08826	2.2447	2.42726	2.64021	2.88847	3.17775	3.51462
0.88	1.84937	1.96567	2.10174	2.2609	2.44696	2.66438	2.91831	3.21471	3.56046
0.89	1.85927	1.97714	2.11532	2.27722	2.46683	2.68879	2.94847	3.25212	3.60695
0.9	1.86924	1.9887	2.12898	2.29365	2.48686	2.71342	2.97895	3.28999	3.65408
0.91	1.87927	2.00033	2.14274	2.31021	2.50704	2.73827	3.00976	3.32833	3.70188
0.92	1.88938	2.01203	2.15659	2.32688	2.52739	2.76336	3.0409	3.36714	3.75035
0.93	1.89956	2.02382	2.17053	2.34367	2.54791	2.78868	3.07237	3.40642	3.79949
0.94	1.90981	2.03568	2.18456	2.36059	2.56858	2.81423	3.10418	3.44619	3.84932
0.95	1.92013	2.04762	2.19869	2.37762	2.58943	2.84003	3.13633	3.48645	3.89985
0.96	1.93053	2.05964	2.21292	2.39478	2.61044	2.86606	3.16882	3.5272	3.95109
0.97	1.94099	2.07174	2.22724	2.41206	2.63163	2.89233	3.20166	3.56846	4.00304
0.98	1.95154	2.08393	2.24165	2.42946	2.65298	2.91884	3.23486	3.61022	4.05573
0.99	1.96216	2.09619	2.25616	2.44699	2.67451	2.9456	3.2684	3.6525	4.10915
1	1.97285	2.10853	2.27077	2.46465	2.69621	2.97261	3.30231	3.6953	4.16333
1.01	1.98362	2.12096	2.28547	2.48243	2.71808	2.99987	3.33658	3.73863	4.21826
1.02	1.99446	2.13347	2.30028	2.50034	2.74013	3.02738	3.37122	3.78249	4.27396
1.03	2.00539	2.14607	2.31518	2.51837	2.76236	3.05514	3.40623	3.82689	4.33045
1.04	2.01639	2.15874	2.33019	2.53654	2.78477	3.08317	3.44161	3.87184	4.38773
1.05	2.02746	2.17151	2.34529	2.55484	2.80736	3.11145	3.47737	3.91734	4.44581
1.06	2.03862	2.18435	2.3605	2.57327	2.83012	3.13999	3.51352	3.9634	4.5047
1.07	2.04986	2.19729	2.3758	2.59183	2.85308	3.1688	3.55005	4.01003	4.56443
1.08	2.06117	2.21031	2.39121	2.61052	2.87621	3.19787	3.58698	4.05724	4.62499
1.09	2.07257	2.22342	2.40673	2.62935	2.89954	3.22722	3.6243	4.10503	4.68641
1.1	2.08404	2.23661	2.42234	2.64831	2.92305	3.25683	3.66202	4.15341	4.74868
1.11	2.0956	2.24989	2.43806	2.66741	2.94675	3.28672	3.70014	4.20238	4.81183
1.12	2.10724	2.26327	2.45389	2.68665	2.97064	3.31689	3.73868	4.25196	4.87587
1.13	2.11897	2.27673	2.46983	2.70602	2.99472	3.34734	3.77762	4.30215	4.94081
1.14	2.13077	2.29028	2.48587	2.72553	3.019	3.37806	3.81698	4.35296	5.00666
1.15	2.14266	2.30393	2.50201	2.74518	3.04347	3.40907	3.85677	4.4044	5.07343
1.16	2.15464	2.31766	2.51827	2.76498	3.06814	3.44037	3.89698	4.45647	5.14114
1.17	2.1667	2.33149	2.53464	2.78491	3.09301	3.47196	3.93762	4.50919	5.2098
1.18	2.17885	2.34541	2.55111	2.80499	3.11807	3.50384	3.9787	4.56256	5.27943
1.19	2.19108	2.35942	2.5677	2.82521	3.14334	3.53602	4.02022	4.61658	5.35003
1.2	2.2034	2.37353	2.5844	2.84557	3.16881	3.56849	4.06219	4.67127	5.42163
1.21	2.21581	2.38773	2.6012	2.86608	3.19448	3.60126	4.1046	4.72664	5.49423
1.22	2.22831	2.40203	2.61813	2.88674	3.22036	3.63434	4.14747	4.78269	5.56785
1.23	2.2409	2.41642	2.63516	2.90755	3.24645	3.66772	4.19079	4.83943	5.6425
1.24	2.25357	2.43091	2.65231	2.9285	3.27275	3.70141	4.23459	4.89687	5.7182
1.25	2.26634	2.4455	2.66958	2.94961	3.29926	3.73541	4.27885	4.95502	5.79496
1.26	2.2792	2.46019	2.68696	2.97086	3.32598	3.76973	4.32358	5.01389	5.8728
1.27	2.29215	2.47498	2.70446	2.99227	3.35292	3.80436	4.3688	5.07349	5.95172
1.28	2.30519	2.48986	2.72208	3.01383	3.38007	3.83932	4.4145	5.13382	6.03176
1.29	2.31832	2.50485	2.73981	3.03555	3.40744	3.87459	4.46069	5.19489	6.11291
1.3	2.33155	2.51993	2.75766	3.05742	3.43502	3.91019	4.50737	5.25672	6.19521
1.31	2.34488	2.53512	2.77564	3.07944	3.46283	3.94612	4.55455	5.31931	6.27865
1.32	2.3583	2.55041	2.79373	3.10163	3.49087	3.98239	4.60224	5.38267	6.36326
1.33	2.37181	2.56581	2.81195	3.12397	3.51912	4.01898	4.65044	5.44681	6.44906
1.34	2.38542	2.58131	2.83028	3.14647	3.5476	4.05592	4.69916	5.51175	6.53605
1.35	2.39913	2.59691	2.84875	3.16913	3.57631	4.0932	4.7484	5.57748	6.62426
1.36	2.41294	2.61262	2.86733	3.19196	3.60525	4.13082	4.79816	5.64402	6.7137
1.37	2.42685	2.62843	2.88604	3.21494	3.63443	4.16878	4.84846	5.71138	6.80439
1.38	2.44086	2.64436	2.90488	3.23809	3.66383	4.2071	4.89929	5.77958	6.89635
1.39	2.45496	2.66038	2.92384	3.26141	3.69347	4.24577	4.95067	5.84861	6.98959
1.4	2.46917	2.67652	2.94293	3.28489	3.72335	4.2848	5.0026	5.91849	7.08413
1.41	2.48348	2.69277	2.96215	3.30854	3.75346	4.32418	5.05509	5.98923	7.17998
1.42	2.49789	2.70913	2.9815	3.33236	3.78382	4.36393	5.10813	6.06084	7.27717
1.43	2.51241	2.72559	3.00098	3.35635	3.81442	4.40405	5.16175	6.13333	7.37571
1.44	2.52703	2.74217	3.02059	3.38051	3.84526	4.44454	5.21593	6.20672	7.47562
1.45	2.54175	2.75886	3.04033	3.40484	3.87635	4.48539	5.2707	6.281	7.57691
1.46	2.55658	2.77567	3.0602	3.42935	3.90769	4.52663	5.32605	6.3562	7.67961
1.47	2.57152	2.79259	3.08021	3.45403	3.93928	4.56824	5.38199	6.43232	7.78373
1.48	2.58656	2.80962	3.10035	3.47888	3.97112	4.61024	5.43853	6.50937	7.8893
1.49	2.60172	2.82677	3.12063	3.50392	4.00321	4.65262	5.49567	6.58737	7.99633
1.5	2.61698	2.84403	3.14104	3.52913	4.03556	4.6954	5.55342	6.66632	8.10483
1.51	2.63235	2.86142	3.16159	3.55452	4.06817	4.73857	5.61179	6.74625	8.21483
1.52	2.64783	2.87892	3.18228	3.58009	4.10103	4.78213	5.67078	6.82715	8.32635
1.53	2.66342	2.89654	3.20311	3.60584	4.13416	4.82609	5.73041	6.90904	8.43941
1.54	2.67913	2.91428	3.22408	3.63178	4.16756	4.87046	5.79066	6.99193	8.55402
1.55	2.69494	2.93213	3.24519	3.6579	4.20121	4.91524	5.85156	7.07583	8.6702
1.56	2.71087	2.95012	3.26645	3.68421	4.23514	4.96042	5.91311	7.16077	8.78798
1.57	2.72692	2.96822	3.28784	3.7107	4.26934	5.00603	5.97531	7.24673	8.90737
1.58	2.74308	2.98644	3.30938	3.73738	4.3038	5.05205	6.03817	7.33375	9.02839
1.59	2.75936	3.00479	3.33106	3.76425	4.33855	5.09849	6.10171	7.42183	9.15107
1.6	2.77575	3.02327	3.35289	3.79132	4.37356	5.14536	6.16592	7.51098	9.27542
1.61	2.79227	3.04187	3.37487	3.81857	4.40886	5.19266	6.23081	7.60121	9.40147
1.62	2.8089	3.0606	3.397	3.84602	4.44444	5.24039	6.29639	7.69254	9.52922
1.63	2.82565	3.07945	3.41927	3.87366	4.4803	5.28856	6.36267	7.78498	9.65871
1.64	2.84252	3.09843	3.4417	3.9015	4.51644	5.33717	6.42965	7.87855	9.78996
1.65	2.85951	3.11755	3.46427	3.92954	4.55287	5.38623	6.49734	7.97325	9.92298
1.66	2.87663	3.13679	3.487	3.95778	4.58959	5.43573	6.56576	8.06909	10.0578
1.67	2.89387	3.15616	3.50988	3.98621	4.6266	5.48569	6.63489	8.1661	10.1944
1.68	2.91123	3.17567	3.53291	4.01485	4.6639	5.5361	6.70476	8.26428	10.3329
1.69	2.92872	3.19531	3.5561	4.04369	4.7015	5.58698	6.77537	8.36365	10.4732
1.7	2.94634	3.21508	3.57944	4.07274	4.7394	5.63832	6.84672	8.46421	10.6154
1.71	2.96408	3.23499	3.60295	4.10199	4.7776	5.69013	6.91883	8.56599	10.7595
1.72	2.98195	3.25503	3.62661	4.13145	4.8161	5.74241	6.99171	8.66899	10.9055
1.73	2.99995	3.27521	3.65043	4.16112	4.8549	5.79517	7.06535	8.77323	11.0534
1.74	3.01807	3.29553	3.67441	4.19099	4.89401	5.84841	7.13977	8.87873	11.2033
1.75	3.03633	3.31599	3.69855	4.22108	4.93343	5.90214	7.21497	8.98549	11.3552
1.76	3.05472	3.33658	3.72285	4.25138	4.97317	5.95635	7.29097	9.09352	11.5091
1.77	3.07325	3.35732	3.74732	4.2819	5.01321	6.01107	7.36777	9.20285	11.665
1.78	3.0919	3.3782	3.77195	4.31263	5.05357	6.06627	7.44538	9.31349	11.8229
1.79	3.11069	3.39922	3.79675	4.34358	5.09425	6.12198	7.5238	9.42544	11.9829
1.8	3.12962	3.42038	3.82172	4.37475	5.13526	6.1782	7.60305	9.53873	12.1449
1.81	3.14869	3.44169	3.84685	4.40614	5.17658	6.23493	7.68313	9.65336	12.3091
1.82	3.16789	3.46315	3.87215	4.43775	5.21823	6.29218	7.76405	9.76936	12.4753
1.83	3.18723	3.48475	3.89762	4.46958	5.26021	6.34994	7.84582	9.88672	12.6437
1.84	3.20671	3.5065	3.92327	4.50164	5.30252	6.40823	7.92844	10.0055	12.8142
1.85	3.22633	3.5284	3.94908	4.53393	5.34516	6.46705	8.01194	10.1256	12.987
1.86	3.24609	3.55045	3.97507	4.56644	5.38814	6.5264	8.0963	10.2472	13.1618
1.87	3.26599	3.57265	4.00124	4.59918	5.43145	6.58628	8.18154	10.3702	13.3389
1.88	3.28604	3.595	4.02758	4.63215	5.47511	6.64672	8.26768	10.4947	13.5182
1.89	3.30624	3.6175	4.0541	4.66536	5.51911	6.70769	8.35471	10.6205	13.6997
1.9	3.32658	3.64016	4.0808	4.6988	5.56345	6.76922	8.44265	10.7479	13.8835
1.91	3.34706	3.66297	4.10767	4.73247	5.60815	6.83131	8.5315	10.8768	14.0695
1.92	3.3677	3.68594	4.13473	4.76638	5.65319	6.89395	8.62128	11.0071	14.2578
1.93	3.38848	3.70907	4.16197	4.80053	5.69859	6.95717	8.71199	11.139	14.4484
1.94	3.40941	3.73236	4.18939	4.83493	5.74434	7.02095	8.80363	11.2724	14.6413
1.95	3.4305	3.7558	4.217	4.86956	5.79045	7.08531	8.89623	11.4073	14.8364
1.96	3.45174	3.77941	4.24479	4.90443	5.83692	7.15024	8.98979	11.5438	15.0339
1.97	3.47313	3.80317	4.27277	4.93956	5.88376	7.21576	9.08431	11.6818	15.2337
1.98	3.49467	3.8271	4.30094	4.97492	5.93096	7.28188	9.17981	11.8214	15.4359
1.99	3.51637	3.8512	4.3293	5.01054	5.97853	7.34858	9.27629	11.9626	15.6403
2	3.53823	3.87546	4.35785	5.04641	6.02648	7.41589	9.37376	12.1054	15.8471
2.01	3.56025	3.89988	4.38659	5.08253	6.07479	7.48379	9.47223	12.2498	16.0562
2.02	3.58242	3.92448	4.41552	5.1189	6.12349	7.55231	9.57171	12.3959	16.2677
2.03	3.60476	3.94924	4.44465	5.15553	6.17256	7.62144	9.67222	12.5436	16.4815
2.04	3.62725	3.97417	4.47397	5.19241	6.22202	7.69119	9.77374	12.6929	16.6976
2.05	3.64991	3.99927	4.50349	5.22956	6.27186	7.76157	9.87631	12.8439	16.916
2.06	3.67274	4.02455	4.53321	5.26696	6.32209	7.83257	9.97992	12.9966	17.1368
2.07	3.69572	4.04999	4.56313	5.30462	6.37271	7.90421	10.0846	13.151	17.3598
2.08	3.71888	4.07562	4.59325	5.34255	6.42372	7.97648	10.1903	13.307	17.5852
2.09	3.7422	4.10142	4.62357	5.38075	6.47513	8.0494	10.2971	13.4648	17.8128
2.1	3.76569	4.12739	4.6541	5.41921	6.52694	8.12297	10.405	13.6243	18.0426
2.11	3.78935	4.15355	4.68483	5.45794	6.57915	8.19719	10.5139	13.7855	18.2747
2.12	3.81318	4.17988	4.71577	5.49694	6.63177	8.27208	10.624	13.9485	18.5089
2.13	3.83719	4.2064	4.74691	5.53621	6.6848	8.34762	10.7352	14.1131	18.7453
2.14	3.86136	4.23309	4.77827	5.57576	6.73823	8.42384	10.8475	14.2796	18.9839
2.15	3.88572	4.25997	4.80983	5.61559	6.79208	8.50073	10.9609	14.4478	19.2245
2.16	3.91025	4.28704	4.84161	5.65569	6.84635	8.57831	11.0754	14.6178	19.4671
2.17	3.93495	4.31429	4.8736	5.69607	6.90103	8.65657	11.1911	14.7895	19.7117
2.18	3.95984	4.34172	4.9058	5.73673	6.95614	8.73551	11.3079	14.9631	19.9582
2.19	3.9849	4.36935	4.93823	5.77768	7.01167	8.81516	11.4259	15.1384	20.2065
2.2	4.01014	4.39717	4.97086	5.81891	7.06763	8.89551	11.5451	15.3155	20.4566
2.21	4.03557	4.42517	5.00372	5.86043	7.12402	8.97656	11.6654	15.4944	20.7084
2.22	4.06118	4.45337	5.0368	5.90224	7.18085	9.05832	11.7869	15.675	20.9618
2.23	4.08698	4.48177	5.0701	5.94434	7.23811	9.14081	11.9096	15.8575	21.2167
2.24	4.11296	4.51035	5.10362	5.98673	7.29582	9.22401	12.0335	16.0418	21.4729
2.25	4.13914	4.53914	5.13737	6.02941	7.35396	9.30795	12.1586	16.2278	21.7304
2.26	4.1655	4.56812	5.17134	6.0724	7.41256	9.39261	12.285	16.4157	21.989
2.27	4.19205	4.5973	5.20555	6.11568	7.4716	9.47802	12.4125	16.6053	22.2486
2.28	4.21879	4.62668	5.23998	6.15926	7.53109	9.56417	12.5413	16.7967	22.5091
2.29	4.24573	4.65627	5.27464	6.20314	7.59104	9.65106	12.6713	16.99	22.7701
2.3	4.27286	4.68605	5.30953	6.24733	7.65145	9.73872	12.8026	17.1849	23.0316
2.31	4.30018	4.71604	5.34466	6.29182	7.71232	9.82713	12.9351	17.3816	23.2934
2.32	4.32771	4.74624	5.38002	6.33662	7.77366	9.91631	13.0688	17.5801	23.5551
2.33	4.35543	4.77665	5.41562	6.38173	7.83546	10.0063	13.2039	17.7803	23.8167
2.34	4.38336	4.80726	5.45146	6.42716	7.89774	10.097	13.3402	17.9822	24.0777
2.35	4.41148	4.83809	5.48754	6.47289	7.96048	10.1885	13.4778	18.1858	24.3379
2.36	4.43981	4.86912	5.52386	6.51894	8.02371	10.2808	13.6166	18.3911	24.5971
2.37	4.46834	4.90037	5.56042	6.56532	8.08742	10.3739	13.7568	18.5981	24.8548
2.38	4.49708	4.93184	5.59722	6.61201	8.15161	10.4678	13.8983	18.8066	25.1106
2.39	4.52603	4.96352	5.63428	6.65902	8.21628	10.5624	14.041	19.0168	25.3643
2.4	4.55518	4.99541	5.67158	6.70635	8.28145	10.6579	14.1851	19.2285	25.6154
2.41	4.58455	5.02753	5.70913	6.75402	8.34711	10.7542	14.3305	19.4418	25.8634
2.42	4.61413	5.05987	5.74693	6.80201	8.41327	10.8514	14.4771	19.6565	26.1078
2.43	4.64392	5.09243	5.78498	6.85033	8.47992	10.9493	14.6252	19.8727	26.3481
2.44	4.67393	5.12521	5.82328	6.89898	8.54708	11.0481	14.7745	20.0904	26.5839
2.45	4.70415	5.15822	5.86185	6.94797	8.61474	11.1477	14.9252	20.3093	26.8144
2.46	4.73459	5.19146	5.90067	6.99729	8.68292	11.2482	15.0771	20.5296	27.0392
2.47	4.76525	5.22492	5.93974	7.04695	8.7516	11.3495	15.2304	20.751	27.2576
2.48	4.79613	5.25861	5.97908	7.09695	8.82081	11.4516	15.3851	20.9737	27.4689
2.49	4.82724	5.29254	6.01869	7.1473	8.89053	11.5546	15.5411	21.1974	27.6727
2.5	4.85857	5.32669	6.05855	7.19798	8.96077	11.6585	15.6984	21.4222	27.8681
2.51	4.89012	5.36109	6.09868	7.24902	9.03154	11.7632	15.857	21.6479	28.0547
2.52	4.9219	5.39572	6.13908	7.3004	9.10284	11.8688	16.017	21.8744	28.2318
2.53	4.95392	5.43058	6.17975	7.35214	9.17467	11.9752	16.1783	22.1016	28.3988
2.54	4.98616	5.46569	6.22069	7.40423	9.24703	12.0826	16.3409	22.3295	28.5555
2.55	5.01863	5.50103	6.2619	7.45667	9.31993	12.1908	16.5049	22.5579	28.7012
2.56	5.05134	5.53662	6.30338	7.50947	9.39338	12.2999	16.6702	22.7866	28.8358
2.57	5.08428	5.57245	6.34514	7.56263	9.46737	12.4099	16.8368	23.0156	28.9592
2.58	5.11747	5.60853	6.38718	7.61615	9.54191	12.5208	17.0047	23.2447	29.0711
2.59	5.15089	5.64486	6.4295	7.67004	9.617	12.6326	17.1739	23.4738	29.1718
2.6	5.18455	5.68143	6.4721	7.72429	9.69264	12.7454	17.3444	23.7025	29.2615
2.61	5.21845	5.71826	6.51498	7.77891	9.76885	12.859	17.5162	23.9309	29.3405
2.62	5.2526	5.75534	6.55815	7.8339	9.84561	12.9735	17.6893	24.1587	29.4093
2.63	5.28699	5.79267	6.6016	7.88927	9.92294	13.089	17.8636	24.3856	29.4685
2.64	5.32163	5.83026	6.64534	7.945	10.0008	13.2053	18.0392	24.6115	29.5188
2.65	5.35652	5.86811	6.68937	8.00112	10.0793	13.3226	18.2161	24.8361	29.5609
2.66	5.39166	5.90621	6.73369	8.05761	10.1583	13.4408	18.3942	25.0591	29.5955
2.67	5.42705	5.94458	6.77831	8.11449	10.238	13.56	18.5735	25.2804	29.6234
2.68	5.4627	5.98321	6.82322	8.17175	10.3182	13.6801	18.7539	25.4994	29.6453
2.69	5.4986	6.0221	6.86843	8.22939	10.3989	13.8011	18.9356	25.7161	29.6619
2.7	5.53476	6.06126	6.91394	8.28743	10.4803	13.9231	19.1184	25.93	29.6738
2.71	5.57118	6.10069	6.95975	8.34585	10.5623	14.046	19.3023	26.1408	29.6817
2.72	5.60787	6.14039	7.00586	8.40467	10.6448	14.1699	19.4873	26.3481	29.6861
2.73	5.64481	6.18036	7.05228	8.46388	10.728	14.2947	19.6734	26.5516	29.6876
2.74	5.68202	6.2206	7.099	8.52349	10.8117	14.4205	19.8606	26.7509	29.6865
2.75	5.7195	6.26112	7.14604	8.5835	10.8961	14.5472	20.0488	26.9455	29.6832
2.76	5.75725	6.30191	7.19338	8.64391	10.981	14.6748	20.2379	27.135	29.678
2.77	5.79526	6.34299	7.24103	8.70472	11.0666	14.8035	20.4279	27.3191	29.6713
2.78	5.83355	6.38434	7.289	8.76594	11.1528	14.933	20.6189	27.4972	29.6633
2.79	5.87211	6.42598	7.33729	8.82757	11.2396	15.0636	20.8107	27.669	29.6542
2.8	5.91095	6.4679	7.38589	8.88961	11.327	15.1951	21.0034	27.834	29.6441
2.81	5.95007	6.51011	7.43481	8.95206	11.415	15.3276	21.1967	27.9919	29.6333
2.82	5.98947	6.55261	7.48406	9.01493	11.5037	15.461	21.3908	28.1423	29.6218
2.83	6.02915	6.59539	7.53362	9.07822	11.593	15.5953	21.5855	28.2848	29.6098
2.84	6.06911	6.63847	7.58352	9.14192	11.6829	15.7307	21.7808	28.4191	29.5973
2.85	6.10936	6.68184	7.63374	9.20605	11.7735	15.867	21.9766	28.5451	29.5844
2.86	6.1499	6.72551	7.68429	9.2706	11.8646	16.0043	22.1728	28.6624	29.5712
2.87	6.19072	6.76947	7.73517	9.33558	11.9565	16.1425	22.3694	28.7711	29.5578
2.88	6.23184	6.81374	7.78639	9.40099	12.0489	16.2816	22.5663	28.871	29.5441
2.89	6.27325	6.8583	7.83794	9.46682	12.142	16.4218	22.7633	28.9622	29.5303
2.9	6.31496	6.90317	7.88983	9.5331	12.2358	16.5628	22.9605	29.0448	29.5163
2.91	6.35697	6.94835	7.94206	9.5998	12.3302	16.7048	23.1577	29.119	29.5022
2.92	6.39927	6.99383	7.99463	9.66695	12.4252	16.8478	23.3547	29.1851	29.488
2.93	6.44188	7.03962	8.04754	9.73454	12.5209	16.9917	23.5515	29.2435	29.4737
2.94	6.48479	7.08573	8.1008	9.80257	12.6173	17.1365	23.748	29.2944	29.4594
2.95	6.528	7.13214	8.15441	9.87104	12.7143	17.2823	23.9441	29.3385	29.445
2.96	6.57152	7.17887	8.20836	9.93996	12.812	17.4289	24.1395	29.3761	29.4305
2.97	6.61536	7.22592	8.26267	10.0093	12.9104	17.5765	24.3342	29.4078	29.416
2.98	6.6595	7.27329	8.31733	10.0792	13.0094	17.725	24.528	29.4339	29.4136
2.99	6.70396	7.32098	8.37235	10.1494	13.1091	17.8744	24.7207	29.4552	29.4208
3	6.74873	7.36899	8.42772	10.2202	13.2094	18.0247	24.9122	29.4719	29.436
3.01	6.79382	7.41733	8.48345	10.2913	13.3104	18.1758	25.1023	29.4847	29.4576
3.02	6.83924	7.46599	8.53955	10.363	13.4121	18.3279	25.2907	29.4939	29.4847
3.03	6.88497	7.51499	8.59601	10.4351	13.5145	18.4807	25.4774	29.5	29.5164
3.04	6.93103	7.56432	8.65283	10.5077	13.6176	18.6345	25.6621	29.5032	29.552
3.05	6.97741	7.61398	8.71003	10.5808	13.7213	18.789	25.8446	29.504	29.591
3.06	7.02413	7.66397	8.76759	10.6543	13.8257	18.9444	26.0246	29.5027	29.6328
3.07	7.07117	7.71431	8.82553	10.7282	13.9308	19.1006	26.2019	29.4995	29.677
3.08	7.11855	7.76498	8.88383	10.8027	14.0366	19.2576	26.3763	29.4947	29.7234
3.09	7.16626	7.81599	8.94252	10.8776	14.143	19.4153	26.5474	29.4886	29.7716
3.1	7.21431	7.86735	9.00158	10.9531	14.2502	19.5738	26.7152	29.4812	29.8215
3.11	7.2627	7.91906	9.06103	11.029	14.358	19.733	26.8792	29.4727	29.8727
3.12	7.31144	7.97112	9.12085	11.1053	14.4665	19.893	27.0392	29.4634	29.9251
3.13	7.36051	8.02352	9.18107	11.1822	14.5758	20.0536	27.1949	29.4533	29.9786
3.14	7.40993	8.07628	9.24166	11.2596	14.6857	20.2149	27.3461	29.4425	30.0331
3.15	7.4597	8.12939	9.30265	11.3374	14.7963	20.3768	27.4925	29.4312	30.0883
3.16	7.50982	8.18286	9.36403	11.4157	14.9075	20.5394	27.6338	29.4194	30.1442
3.17	7.5603	8.23669	9.4258	11.4946	15.0195	20.7025	27.7698	29.4071	30.2008
3.18	7.61113	8.29088	9.48796	11.5739	15.1322	20.8662	27.9002	29.3946	30.2579
3.19	7.66231	8.34543	9.55052	11.6537	15.2455	21.0304	28.0248	29.3817	30.3154
3.2	7.71386	8.40035	9.61349	11.734	15.3596	21.195	28.1434	29.3685	30.3734
3.21	7.76577	8.45564	9.67685	11.8148	15.4743	21.3602	28.2558	29.3552	30.4317
3.22	7.81804	8.5113	9.74062	11.8961	15.5898	21.5257	28.362	29.3416	30.4903
3.23	7.87068	8.56733	9.80479	11.9779	15.7059	21.6916	28.4616	29.3279	30.5492
3.24	7.92368	8.62373	9.86937	12.0603	15.8227	21.8578	28.5548	29.3141	30.6083
3.25	7.97706	8.68051	9.93436	12.1431	15.9402	22.0244	28.6415	29.3001	30.6676
3.26	8.03082	8.73767	9.99976	12.2264	16.0584	22.1911	28.7217	29.2861	30.7271
3.27	8.08494	8.79521	10.0656	12.3103	16.1772	22.358	28.7954	29.272	30.7867
3.28	8.13945	8.85314	10.1318	12.3947	16.2967	22.5251	28.8627	29.2578	30.8464
3.29	8.19434	8.91145	10.1984	12.4796	16.417	22.6922	28.9239	29.2435	30.9063
3.3	8.24961	8.97015	10.2655	12.565	16.5379	22.8593	28.979	29.2292	30.9662
3.31	8.30526	9.02924	10.333	12.6509	16.6594	23.0263	29.0284	29.2149	31.0262
3.32	8.36131	9.08872	10.4009	12.7373	16.7817	23.1933	29.0722	29.2005	31.0863
3.33	8.41774	9.14859	10.4693	12.8243	16.9046	23.36	29.1108	29.1861	31.1464
3.34	8.47456	9.20886	10.538	12.9118	17.0282	23.5265	29.1444	29.1823	31.2066
3.35	8.53178	9.26954	10.6072	12.9998	17.1524	23.6926	29.1733	29.1871	31.2667
3.36	8.5894	9.33061	10.6769	13.0883	17.2773	23.8583	29.1979	29.1992	31.3269
3.37	8.64742	9.39208	10.7469	13.1774	17.4029	24.0234	29.2186	29.2174	31.3871
3.38	8.70584	9.45397	10.8174	13.267	17.5291	24.188	29.2355	29.2408	31.4474
3.39	8.76466	9.51626	10.8884	13.3571	17.6559	24.3518	29.2491	29.2686	31.5076
3.4	8.82389	9.57896	10.9598	13.4478	17.7834	24.5148	29.2595	29.3003	31.5678
3.41	8.88353	9.64207	11.0316	13.539	17.9115	24.677	29.2672	29.3353	31.628
3.42	8.94358	9.7056	11.1039	13.6307	18.0402	24.8381	29.2724	29.3733	31.6882
3.43	9.00404	9.76955	11.1766	13.723	18.1695	24.998	29.2753	29.4138	31.7484
3.44	9.06492	9.83391	11.2498	13.8158	18.2995	25.1567	29.2762	29.4565	31.8086
3.45	9.12622	9.8987	11.3234	13.9091	18.43	25.314	29.2752	29.5013	31.8687
3.46	9.18794	9.96391	11.3974	14.003	18.5612	25.4698	29.2727	29.5478	31.9289
3.47	9.25009	10.0296	11.4719	14.0974	18.6929	25.6239	29.2687	29.5959	31.989
3.48	9.31266	10.0956	11.5469	14.1923	18.8252	25.7763	29.2634	29.6454	32.0491
3.49	9.37566	10.1621	11.6224	14.2878	18.9581	25.9267	29.257	29.6961	32.1091
3.5	9.43909	10.229	11.6983	14.3839	19.0915	26.075	29.2496	29.748	32.1692
3.51	9.50296	10.2964	11.7746	14.4804	19.2255	26.221	29.2413	29.8008	32.2292
3.52	9.56726	10.3642	11.8514	14.5776	19.36	26.3647	29.2322	29.8544	32.2891
3.53	9.632	10.4324	11.9287	14.6752	19.495	26.5057	29.2225	29.9089	32.3491
3.54	9.69718	10.5011	12.0065	14.7734	19.6306	26.6441	29.2122	29.9641	32.409
3.55	9.7628	10.5703	12.0847	14.8721	19.7666	26.7795	29.2013	30.0199	32.4689
3.56	9.82887	10.6398	12.1634	14.9714	19.9031	26.9119	29.19	30.0762	32.5287
3.57	9.89539	10.7099	12.2426	15.0713	20.0401	27.0411	29.1782	30.133	32.5885
3.58	9.96236	10.7804	12.3222	15.1716	20.1775	27.1668	29.1662	30.1903	32.6483
3.59	10.0298	10.8513	12.4024	15.2726	20.3153	27.289	29.1538	30.248	32.7081
3.6	10.0977	10.9227	12.4829	15.374	20.4535	27.4074	29.1411	30.306	32.7678
3.61	10.166	10.9945	12.564	15.476	20.5922	27.522	29.1282	30.3644	32.8275
3.62	10.2348	11.0668	12.6456	15.5785	20.7312	27.6325	29.1151	30.423	32.8871
3.63	10.3041	11.1396	12.7276	15.6816	20.8706	27.7388	29.1019	30.4818	32.9467
3.64	10.3738	11.2128	12.8101	15.7852	21.0102	27.8409	29.0884	30.5409	33.0063
3.65	10.444	11.2865	12.8932	15.8894	21.1502	27.9385	29.0749	30.6002	33.0659
3.66	10.5146	11.3606	12.9766	15.9941	21.2905	28.0316	29.0612	30.6596	33.1254
3.67	10.5858	11.4353	13.0606	16.0993	21.431	28.1201	29.0474	30.7192	33.1849
3.68	10.6574	11.5104	13.1451	16.2051	21.5718	28.204	29.0335	30.7789	33.2443
3.69	10.7295	11.586	13.2301	16.3114	21.7127	28.2831	29.0196	30.8388	33.3037
3.7	10.802	11.662	13.3155	16.4182	21.8539	28.3576	29.0056	30.8987	33.3631
3.71	10.8751	11.7386	13.4015	16.5255	21.9951	28.4273	28.9915	30.9587	33.4224
3.72	10.9486	11.8156	13.4879	16.6334	22.1365	28.4922	28.9774	31.0188	33.4817
3.73	11.0226	11.8931	13.5749	16.7418	22.278	28.5526	28.9633	31.0789	33.541
3.74	11.0971	11.9711	13.6623	16.8507	22.4195	28.6083	28.9491	31.1391	33.6003
3.75	11.1721	12.0495	13.7503	16.9602	22.561	28.6595	28.9349	31.1994	33.6595
3.76	11.2476	12.1285	13.8387	17.0702	22.7024	28.7064	28.9206	31.2596	33.7186
3.77	11.3236	12.208	13.9276	17.1806	22.8438	28.7489	28.9063	31.3199	33.7778
3.78	11.4001	12.2879	14.0171	17.2916	22.985	28.7874	28.8921	31.3803	33.8369
3.79	11.4771	12.3683	14.107	17.4031	23.1261	28.8219	28.8869	31.4406	33.8959
3.8	11.5546	12.4493	14.1975	17.5151	23.267	28.8527	28.8894	31.5009	33.955
3.81	11.6326	12.5307	14.2884	17.6276	23.4076	28.8798	28.8984	31.5613	34.014
3.82	11.7111	12.6127	14.3799	17.7406	23.5479	28.9036	28.913	31.6216	34.0729
3.83	11.7901	12.6951	14.4718	17.8541	23.6879	28.9241	28.9324	31.682	34.1319
3.84	11.8697	12.778	14.5643	17.9681	23.8274	28.9416	28.956	31.7423	34.1908
3.85	11.9497	12.8615	14.6573	18.0825	23.9665	28.9564	28.9834	31.8026	34.2496
3.86	12.0303	12.9454	14.7508	18.1974	24.105	28.9685	29.014	31.8629	34.3085
3.87	12.1113	13.0299	14.8447	18.3128	24.2429	28.9782	29.0476	31.9232	34.3672
3.88	12.1929	13.1149	14.9392	18.4287	24.3802	28.9856	29.0837	31.9835	34.426
3.89	12.2751	13.2003	15.0342	18.545	24.5167	28.991	29.1222	32.0437	34.4847
3.9	12.3577	13.2863	15.1297	18.6617	24.6524	28.9945	29.1627	32.104	34.5434
3.91	12.4409	13.3728	15.2258	18.7789	24.7873	28.9963	29.2052	32.1642	34.6021
3.92	12.5246	13.4599	15.3223	18.8966	24.9212	28.9964	29.2493	32.2244	34.6607
3.93	12.6088	13.5474	15.4193	19.0146	25.0541	28.9951	29.295	32.2845	34.7193
3.94	12.6936	13.6355	15.5168	19.1331	25.1858	28.9925	29.342	32.3446	34.7779
3.95	12.7789	13.7241	15.6149	19.252	25.3164	28.9887	29.3904	32.4047	34.8364
3.96	12.8647	13.8132	15.7134	19.3713	25.4457	28.9839	29.4398	32.4648	34.8949
3.97	12.9511	13.9028	15.8125	19.491	25.5737	28.978	29.4903	32.5248	34.9533
3.98	13.038	13.993	15.912	19.6111	25.7002	28.9713	29.5418	32.5849	35.0117
3.99	13.1254	14.0836	16.0121	19.7316	25.8251	28.9637	29.5941	32.6448	35.0701
4	13.2134	14.1748	16.1126	19.8524	25.9484	28.9555	29.6472	32.7048	35.1285
4.01	13.3019	14.2666	16.2137	19.9735	26.07	28.9466	29.701	32.7647	35.1868
4.02	13.391	14.3588	16.3153	20.095	26.1897	28.9371	29.7555	32.8246	35.2451
4.03	13.4807	14.4516	16.4173	20.2169	26.3075	28.9271	29.8105	32.8844	35.3034
4.04	13.5708	14.5449	16.5199	20.339	26.4232	28.9167	29.8662	32.9442	35.3616
4.05	13.6616	14.6387	16.6229	20.4614	26.5368	28.9058	29.9223	33.004	35.4198
4.06	13.7529	14.7331	16.7265	20.5842	26.6482	28.8945	29.9788	33.0637	35.4779
4.07	13.8447	14.828	16.8305	20.7072	26.7571	28.883	30.0358	33.1235	35.5361
4.08	13.9371	14.9235	16.935	20.8304	26.8637	28.8711	30.0931	33.1831	35.5941
4.09	14.03	15.0194	17.04	20.9539	26.9677	28.859	30.1508	33.2428	35.6522
4.1	14.1235	15.1159	17.1455	21.0776	27.069	28.8466	30.2088	33.3024	35.7102
4.11	14.2176	15.2129	17.2515	21.2015	27.1676	28.834	30.2671	33.362	35.7682
4.12	14.3122	15.3105	17.3579	21.3256	27.2633	28.8212	30.3256	33.4215	35.8262
4.13	14.4073	15.4086	17.4648	21.4499	27.3561	28.8082	30.3844	33.481	35.8841
4.14	14.5031	15.5072	17.5722	21.5743	27.4458	28.7951	30.4434	33.5405	35.942
4.15	14.5994	15.6063	17.6801	21.6988	27.5325	28.7819	30.5025	33.5999	35.9999
4.16	14.6962	15.706	17.7884	21.8234	27.616	28.7686	30.5619	33.6593	36.0577
4.17	14.7936	15.8062	17.8972	21.9481	27.6962	28.7551	30.6214	33.7186	36.1155
4.18	14.8916	15.907	18.0064	22.0729	27.7732	28.7416	30.681	33.778	36.1733
4.19	14.9901	16.0082	18.1161	22.1977	27.8468	28.7279	30.7408	33.8373	36.231
4.2	15.0892	16.11	18.2263	22.3225	27.917	28.7142	30.8007	33.8965	36.2887
4.21	15.1889	16.2123	18.3368	22.4473	27.9839	28.7005	30.8606	33.9558	36.3463
4.22	15.2891	16.3152	18.4478	22.572	28.0472	28.6867	30.9207	34.0149	36.404
4.23	15.3899	16.4185	18.5593	22.6967	28.1072	28.6728	30.9808	34.0741	36.4616
4.24	15.4912	16.5224	18.6712	22.8212	28.1637	28.6589	31.041	34.1332	36.5192
4.25	15.5931	16.6268	18.7834	22.9456	28.2168	28.6449	31.1013	34.1923	36.5767
4.26	15.6956	16.7318	18.8961	23.0698	28.2666	28.6309	31.1616	34.2513	36.6342
4.27	15.7986	16.8372	19.0092	23.1939	28.313	28.6169	31.222	34.3103	36.6917
4.28	15.9022	16.9431	19.1227	23.3176	28.3561	28.6029	31.2824	34.3693	36.7491
4.29	16.0064	17.0496	19.2366	23.4411	28.396	28.5888	31.3428	34.4282	36.8065
4.3	16.1111	17.1566	19.3509	23.5643	28.4328	28.5747	31.4033	34.4871	36.8639
4.31	16.2163	17.2641	19.4655	23.6871	28.4665	28.5606	31.4637	34.546	36.9212
4.32	16.3222	17.372	19.5805	23.8095	28.4973	28.5465	31.5242	34.6048	36.9785
4.33	16.4285	17.4805	19.6958	23.9315	28.5252	28.5324	31.5847	34.6636	37.0358
4.34	16.5354	17.5895	19.8115	24.053	28.5503	28.526	31.6452	34.7224	37.0931
4.35	16.6429	17.699	19.9275	24.174	28.5728	28.5263	31.7057	34.7811	37.1503
4.36	16.7509	17.8089	20.0439	24.2944	28.5928	28.5323	31.7662	34.8398	37.2075
4.37	16.8595	17.9194	20.1605	24.4141	28.6104	28.5433	31.8267	34.8985	37.2646
4.38	16.9686	18.0303	20.2775	24.5332	28.6256	28.5587	31.8872	34.9571	37.3217
4.39	17.0782	18.1417	20.3947	24.6515	28.6388	28.578	31.9477	35.0157	37.3788
4.4	17.1884	18.2535	20.5123	24.7691	28.6498	28.6008	32.0082	35.0743	37.4359
4.41	17.2991	18.3658	20.6301	24.8858	28.659	28.6267	32.0686	35.1328	37.4929
4.42	17.4103	18.4786	20.7481	25.0017	28.6663	28.6555	32.1291	35.1913	37.5499
4.43	17.5221	18.5919	20.8664	25.1165	28.672	28.6868	32.1895	35.2497	37.6068
4.44	17.6344	18.7055	20.9849	25.2304	28.676	28.7204	32.2499	35.3081	37.6638
4.45	17.7472	18.8197	21.1035	25.3432	28.6786	28.7562	32.3103	35.3665	37.7207
4.46	17.8605	18.9342	21.2224	25.4548	28.6798	28.7938	32.3706	35.4249	37.7775
4.47	17.9743	19.0492	21.3415	25.5652	28.6798	28.8332	32.4309	35.4832	37.8344
4.48	18.0887	19.1646	21.4607	25.6744	28.6785	28.8743	32.4912	35.5415	37.8912
4.49	18.2035	19.2804	21.58	25.7822	28.6762	28.9168	32.5515	35.5997	37.9479
4.5	18.3188	19.3966	21.6994	25.8886	28.6728	28.9608	32.6118	35.6579	38.0047
4.51	18.4346	19.5132	21.819	25.9935	28.6686	29.0059	32.672	35.7161	38.0614
4.52	18.5509	19.6302	21.9386	26.0969	28.6634	29.0523	32.7322	35.7743	38.1181
4.53	18.6677	19.7475	22.0583	26.1986	28.6575	29.0997	32.7923	35.8324	38.1747
4.54	18.7849	19.8652	22.1779	26.2987	28.6509	29.1481	32.8524	35.8905	38.2313
4.55	18.9026	19.9833	22.2976	26.397	28.6436	29.1975	32.9125	35.9485	38.2879
4.56	19.0207	20.1017	22.4173	26.4934	28.6356	29.2477	32.9726	36.0065	38.3445
4.57	19.1393	20.2204	22.5369	26.5879	28.6272	29.2987	33.0326	36.0645	38.401
4.58	19.2584	20.3394	22.6565	26.6805	28.6182	29.3504	33.0926	36.1225	38.4575
4.59	19.3778	20.4588	22.776	26.771	28.6087	29.4029	33.1526	36.1804	38.5139
4.6	19.4977	20.5784	22.8953	26.8594	28.5988	29.456	33.2125	36.2383	38.5704
4.61	19.6179	20.6983	23.0144	26.9456	28.5886	29.5096	33.2724	36.2961	38.6268
4.62	19.7386	20.8185	23.1334	27.0295	28.5779	29.5639	33.3323	36.3539	38.6831
4.63	19.8596	20.9389	23.2522	27.1111	28.567	29.6186	33.3921	36.4117	38.7395
4.64	19.981	21.0595	23.3707	27.1903	28.5557	29.6738	33.4519	36.4694	38.7958
4.65	20.1028	21.1803	23.4889	27.2671	28.5442	29.7295	33.5116	36.5271	38.852
4.66	20.2249	21.3013	23.6068	27.3414	28.5325	29.7856	33.5713	36.5848	38.9083
4.67	20.3473	21.4226	23.7243	27.4132	28.5205	29.842	33.631	36.6425	38.9645
4.68	20.4701	21.5439	23.8414	27.4824	28.5083	29.8989	33.6906	36.7001	39.0207
4.69	20.5932	21.6654	23.9581	27.549	28.496	29.956	33.7503	36.7576	39.0768
4.7	20.7165	21.787	24.0743	27.6129	28.4835	30.0135	33.8098	36.8152	39.133
4.71	20.8402	21.9087	24.19	27.6741	28.4708	30.0713	33.8693	36.8727	39.1891
4.72	20.9641	22.0305	24.3051	27.7327	28.458	30.1293	33.9288	36.9302	39.2451
4.73	21.0882	22.1523	24.4196	27.7885	28.445	30.1876	33.9883	36.9876	39.3011
4.74	21.2125	22.2741	24.5334	27.8416	28.432	30.2461	34.0477	37.0451	39.3571
4.75	21.3371	22.3959	24.6465	27.8921	28.4189	30.3048	34.1071	37.1024	39.4131
4.76	21.4618	22.5177	24.7588	27.9398	28.4056	30.3637	34.1665	37.1598	39.469
4.77	21.5867	22.6394	24.8704	27.9848	28.3923	30.4228	34.2258	37.2171	39.5249
4.78	21.7117	22.761	24.9811	28.0272	28.3789	30.482	34.2851	37.2744	39.5808
4.79	21.8368	22.8825	25.0908	28.0669	28.3655	30.5414	34.3443	37.3316	39.6367
4.8	21.962	23.0039	25.1996	28.1041	28.352	30.601	34.4035	37.3889	39.6925
4.81	22.0873	23.1251	25.3074	28.1387	28.3384	30.6607	34.4627	37.446	39.7483
4.82	22.2126	23.246	25.4141	28.1708	28.3248	30.7205	34.5218	37.5032	39.804
4.83	22.338	23.3667	25.5196	28.2005	28.3111	30.7804	34.5809	37.5603	39.8597
4.84	22.4633	23.4871	25.6239	28.2278	28.2974	30.8404	34.64	37.6174	39.9154
4.85	22.5885	23.6072	25.7269	28.2528	28.2837	30.9005	34.699	37.6745	39.9711
4.86	22.7137	23.7269	25.8286	28.2755	28.2699	30.9607	34.758	37.7315	40.0267
4.87	22.8388	23.8462	25.9289	28.2962	28.2561	31.021	34.817	37.7885	40.0823
4.88	22.9637	23.9651	26.0278	28.3147	28.2423	31.0813	34.8759	37.8454	40.1379
4.89	23.0885	24.0834	26.1251	28.3313	28.2285	31.1417	34.9348	37.9024	40.1934
4.9	23.213	24.2013	26.2208	28.3459	28.2146	31.2022	34.9936	37.9593	40.249
4.91	23.3373	24.3185	26.3149	28.3587	28.2008	31.2627	35.0524	38.0161	40.3044
4.92	23.4613	24.4351	26.4072	28.3698	28.1869	31.3232	35.1112	38.073	40.3599
4.93	23.585	24.551	26.4977	28.3792	28.173	31.3838	35.17	38.1298	40.4153
4.94	23.7083	24.6661	26.5864	28.387	28.1591	31.4444	35.2287	38.1865	40.4707
4.95	23.8312	24.7805	26.6732	28.3934	28.1452	31.505	35.2873	38.2433	40.5261
4.96	23.9536	24.8941	26.758	28.3983	28.1312	31.5657	35.346	38.3	40.5814
4.97	24.0756	25.0067	26.8407	28.4019	28.1173	31.6263	35.4045	38.3567	40.6367
4.98	24.1969	25.1184	26.9214	28.4043	28.1099	31.687	35.4631	38.4133	40.692
4.99	24.3177	25.229	26.9998	28.4054	28.1083	31.7477	35.5216	38.4699	40.7472
5	24.4378	25.3386	27.0761	28.4055	28.1116	31.8084	35.5801	38.5265	40.8024
5.01	24.5572	25.447	27.1501	28.4046	28.1194	31.8691	35.6386	38.583	40.8576
5.02	24.6758	25.5542	27.2218	28.4026	28.1312	31.9298	35.697	38.6395	40.9128
5.03	24.7936	25.6602	27.2911	28.3998	28.1466	31.9905	35.7554	38.696	40.9679
5.04	24.9105	25.7648	27.3581	28.3961	28.1651	32.0513	35.8137	38.7525	41.023
5.05	25.0265	25.868	27.4226	28.3916	28.1866	32.1119	35.872	38.8089	41.078
5.06	25.1415	25.9697	27.4846	28.3864	28.2108	32.1726	35.9303	38.8653	41.1331
5.07	25.2554	26.0699	27.5441	28.3806	28.2373	32.2333	35.9886	38.9216	41.1881
5.08	25.3681	26.1685	27.6011	28.3741	28.2662	32.294	36.0468	38.978	41.243
5.09	25.4797	26.2654	27.6556	28.367	28.2971	32.3546	36.1049	39.0343	41.298
5.1	25.59	26.3606	27.7076	28.3593	28.3299	32.4152	36.1631	39.0905	41.3529
5.11	25.6989	26.4539	27.757	28.3512	28.3644	32.4758	36.2212	39.1467	41.4078
5.12	25.8065	26.5453	27.804	28.3426	28.4006	32.5364	36.2792	39.2029	41.4626
5.13	25.9125	26.6348	27.8484	28.3335	28.4383	32.597	36.3373	39.2591	41.5175
5.14	26.017	26.7223	27.8903	28.3241	28.4774	32.6575	36.3953	39.3152	41.5723
5.15	26.1198	26.8076	27.9297	28.3143	28.5179	32.718	36.4532	39.3714	41.627
5.16	26.221	26.8909	27.9667	28.3042	28.5596	32.7785	36.5112	39.4274	41.6818
5.17	26.3204	26.9719	28.0013	28.2937	28.6024	32.839	36.5691	39.4835	41.7365
5.18	26.4179	27.0506	28.0335	28.283	28.6463	32.8994	36.6269	39.5395	41.7912
5.19	26.5134	27.127	28.0634	28.272	28.6913	32.9598	36.6848	39.5955	41.8458
5.2	26.607	27.201	28.091	28.2607	28.7372	33.0202	36.7426	39.6514	41.9004
5.21	26.6985	27.2725	28.1165	28.2493	28.784	33.0806	36.8003	39.7073	41.955
5.22	26.7878	27.3416	28.1398	28.2376	28.8316	33.1409	36.858	39.7632	42.0096
5.23	26.8749	27.4082	28.1611	28.2257	28.88	33.2012	36.9157	39.8191	42.0641
5.24	26.9597	27.4722	28.1803	28.2137	28.9292	33.2614	36.9734	39.8749	42.1186
5.25	27.0421	27.5336	28.1976	28.2015	28.9791	33.3216	37.031	39.9307	42.1731
5.26	27.1222	27.5925	28.2131	28.1891	29.0297	33.3818	37.0886	39.9865	42.2276
5.27	27.1997	27.6487	28.2268	28.1766	29.0809	33.442	37.1461	40.0422	42.282
5.28	27.2747	27.7023	28.2387	28.164	29.1326	33.5021	37.2037	40.0979	42.3364
5.29	27.3471	27.7532	28.2491	28.1513	29.185	33.5622	37.2612	40.1536	42.3907
5.3	27.4169	27.8015	28.2579	28.1385	29.2378	33.6222	37.3186	40.2092	42.4451
5.31	27.484	27.8473	28.2652	28.1256	29.2912	33.6823	37.376	40.2648	42.4994
5.32	27.5484	27.8904	28.2711	28.1126	29.3451	33.7422	37.4334	40.3204	42.5536
5.33	27.6101	27.9309	28.2757	28.0995	29.3993	33.8022	37.4908	40.376	42.6079
5.34	27.6691	27.9689	28.279	28.0864	29.4541	33.8621	37.5481	40.4315	42.6621
5.35	27.7252	28.0045	28.2812	28.0731	29.5092	33.922	37.6054	40.487	42.7163
5.36	27.7786	28.0375	28.2822	28.0599	29.5647	33.9818	37.6626	40.5424	42.7704
5.37	27.8293	28.0682	28.2822	28.0465	29.6205	34.0416	37.7199	40.5979	42.8246
5.38	27.8772	28.0965	28.2812	28.0331	29.6767	34.1013	37.777	40.6533	42.8787
5.39	27.9223	28.1226	28.2792	28.0197	29.7332	34.1611	37.8342	40.7086	42.9327
5.4	27.9647	28.1464	28.2764	28.0063	29.7901	34.2208	37.8913	40.764	42.9868
5.41	28.0045	28.1681	28.2728	27.9928	29.8471	34.2804	37.9484	40.8193	43.0408
5.42	28.0416	28.1877	28.2684	27.9792	29.9045	34.34	38.0055	40.8745	43.0948
5.43	28.0761	28.2053	28.2634	27.9657	29.9622	34.3996	38.0625	40.9298	43.1487
5.44	28.1082	28.2209	28.2576	27.9521	30.02	34.4591	38.1195	40.985	43.2026
5.45	28.1377	28.2348	28.2513	27.9384	30.0781	34.5186	38.1764	41.0402	43.2565
5.46	28.1648	28.2469	28.2443	27.9248	30.1364	34.5781	38.2333	41.0954	43.3104
5.47	28.1896	28.2573	28.2369	27.9111	30.1949	34.6375	38.2902	41.1505	43.3642
5.48	28.2121	28.2662	28.2289	27.8975	30.2536	34.6969	38.3471	41.2056	43.4181
5.49	28.2325	28.2735	28.2205	27.8838	30.3125	34.7562	38.4039	41.2606	43.4718
5.5	28.2508	28.2794	28.2117	27.8701	30.3716	34.8156	38.4607	41.3157	43.5256
5.51	28.267	28.2839	28.2025	27.8563	30.4308	34.8748	38.5174	41.3707	43.5793
5.52	28.2813	28.2871	28.1929	27.8426	30.4901	34.934	38.5742	41.4257	43.633
5.53	28.2938	28.2891	28.1829	27.8289	30.5496	34.9933	38.6309	41.4806	43.6867
5.54	28.3045	28.29	28.1727	27.8151	30.6092	35.0524	38.6875	41.5355	43.7403
5.55	28.3136	28.2899	28.1622	27.8014	30.669	35.1115	38.7441	41.5904	43.7939
5.56	28.3211	28.2887	28.1514	27.7876	30.7289	35.1706	38.8007	41.6453	43.8475
5.57	28.3271	28.2866	28.1403	27.7738	30.7888	35.2296	38.8573	41.7001	43.9011
5.58	28.3317	28.2836	28.129	27.7601	30.8489	35.2887	38.9138	41.7549	43.9546
5.59	28.335	28.2798	28.1176	27.7463	30.9091	35.3476	38.9703	41.8096	44.0081
5.6	28.337	28.2752	28.1059	27.7384	30.9693	35.4066	39.0268	41.8644	44.0616
5.61	28.3379	28.27	28.094	27.7355	31.0296	35.4655	39.0832	41.9191	44.115
5.62	28.3376	28.264	28.082	27.7372	31.09	35.5243	39.1396	41.9738	44.1684
5.63	28.3364	28.2575	28.0698	27.7429	31.1505	35.5831	39.196	42.0284	44.2218
5.64	28.3341	28.2504	28.0575	27.7523	31.211	35.6419	39.2523	42.083	44.2751
5.65	28.331	28.2427	28.0451	27.765	31.2716	35.7007	39.3086	42.1376	44.3285
5.66	28.3271	28.2346	28.0326	27.7807	31.3322	35.7594	39.3649	42.1922	44.3818
5.67	28.3223	28.226	28.0199	27.7992	31.3929	35.818	39.4211	42.2467	44.435
5.68	28.3169	28.217	28.0071	27.8202	31.4536	35.8767	39.4773	42.3012	44.4883
5.69	28.3108	28.2076	27.9943	27.8435	31.5144	35.9353	39.5335	42.3557	44.5415
5.7	28.304	28.1978	27.9813	27.8689	31.5752	35.9938	39.5897	42.4101	44.5947
5.71	28.2967	28.1877	27.9683	27.8963	31.636	36.0523	39.6458	42.4645	44.6479
5.72	28.2889	28.1773	27.9553	27.9256	31.6969	36.1108	39.7019	42.5189	44.701
5.73	28.2806	28.1666	27.9421	27.9566	31.7578	36.1693	39.7579	42.5733	44.7541
5.74	28.2718	28.1557	27.9289	27.9892	31.8187	36.2277	39.8139	42.6276	44.8072
5.75	28.2626	28.1445	27.9157	28.0234	31.8796	36.2861	39.8699	42.6819	44.8602
5.76	28.253	28.1331	27.9024	28.0589	31.9405	36.3444	39.9258	42.7361	44.9132
5.77	28.243	28.1215	27.889	28.0958	32.0014	36.4027	39.9818	42.7904	44.9662
5.78	28.2327	28.1097	27.8756	28.1339	32.0624	36.461	40.0377	42.8446	45.0192
5.79	28.2222	28.0977	27.8622	28.1732	32.1234	36.5192	40.0935	42.8988	45.0721
5.8	28.2113	28.0856	27.8487	28.2136	32.1843	36.5774	40.1493	42.9529	45.125
5.81	28.2002	28.0733	27.8353	28.2551	32.2452	36.6356	40.2051	43.007	45.1779
5.82	28.1888	28.0609	27.8217	28.2975	32.3062	36.6937	40.2609	43.0611	45.2308
5.83	28.1773	28.0484	27.8082	28.3409	32.3671	36.7518	40.3166	43.1152	45.2836
5.84	28.1655	28.0357	27.7946	28.3852	32.4281	36.8098	40.3723	43.1692	45.3364
5.85	28.1536	28.023	27.7811	28.4303	32.489	36.8678	40.428	43.2232	45.3891
5.86	28.1414	28.0102	27.7675	28.4763	32.5499	36.9258	40.4836	43.2772	45.4419
5.87	28.1292	27.9972	27.7538	28.5229	32.6108	36.9837	40.5393	43.3311	45.4946
5.88	28.1168	27.9842	27.7402	28.5704	32.6717	37.0416	40.5948	43.385	45.5473
5.89	28.1043	27.9711	27.7266	28.6184	32.7326	37.0995	40.6504	43.4389	45.5999
5.9	28.0916	27.958	27.7129	28.6672	32.7934	37.1574	40.7059	43.4928	45.6526
5.91	28.0788	27.9448	27.6993	28.7166	32.8543	37.2151	40.7614	43.5466	45.7052
5.92	28.066	27.9315	27.6856	28.7666	32.9151	37.2729	40.8168	43.6004	45.7577
5.93	28.053	27.9182	27.6719	28.8171	32.9759	37.3306	40.8723	43.6542	45.8103
5.94	28.04	27.9049	27.6582	28.8682	33.0367	37.3883	40.9276	43.7079	45.8628
5.95	28.0269	27.8915	27.6445	28.9198	33.0974	37.446	40.983	43.7616	45.9153
5.96	28.0137	27.8781	27.6308	28.9719	33.1581	37.5036	41.0383	43.8153	45.9678
5.97	28.0005	27.8646	27.6172	29.0244	33.2188	37.5612	41.0936	43.869	46.0202
5.98	27.9872	27.8511	27.6035	29.0774	33.2795	37.6187	41.1489	43.9226	46.0726
5.99	27.9739	27.8376	27.5954	29.1309	33.3401	37.6763	41.2041	43.9762	46.125
6	27.9605	27.824	27.5922	29.1847	33.4008	37.7337	41.2593	44.0297	46.1773
6.01	27.9471	27.8104	27.5935	29.239	33.4613	37.7912	41.3145	44.0833	46.2297
6.02	27.9336	27.7968	27.5988	29.2936	33.5219	37.8486	41.3697	44.1368	46.282
6.03	27.9201	27.7832	27.6075	29.3486	33.5824	37.906	41.4248	44.1903	46.3342
6.04	27.9065	27.7696	27.6196	29.4039	33.6429	37.9633	41.4798	44.2437	46.3865
6.05	27.893	27.756	27.6345	29.4595	33.7034	38.0206	41.5349	44.2972	46.4387
6.06	27.8794	27.7423	27.6522	29.5155	33.7638	38.0779	41.5899	44.3505	46.4909
6.07	27.8658	27.7286	27.6723	29.5717	33.8242	38.1351	41.6449	44.4039	46.543
6.08	27.8522	27.715	27.6948	29.6282	33.8845	38.1923	41.6999	44.4573	46.5952
6.09	27.8385	27.7013	27.7193	29.685	33.9449	38.2495	41.7548	44.5106	46.6473
6.1	27.8249	27.6876	27.7458	29.7421	34.0051	38.3066	41.8097	44.5639	46.6994
6.11	27.8112	27.6739	27.7742	29.7994	34.0654	38.3637	41.8646	44.6171	46.7514
6.12	27.7975	27.6602	27.8043	29.8569	34.1256	38.4208	41.9194	44.6703	46.8034
6.13	27.7838	27.6465	27.8359	29.9147	34.1858	38.4778	41.9742	44.7235	46.8554
6.14	27.7701	27.6328	27.8691	29.9726	34.2459	38.5348	42.029	44.7767	46.9074
6.15	27.7564	27.6248	27.9037	30.0308	34.306	38.5918	42.0837	44.8298	46.9593
6.16	27.7426	27.6219	27.9396	30.0892	34.3661	38.6487	42.1384	44.883	47.0113
6.17	27.7289	27.6234	27.9767	30.1478	34.4261	38.7056	42.1931	44.936	47.0632
6.18	27.7152	27.629	28.0151	30.2065	34.4861	38.7625	42.2478	44.9891	47.115
6.19	27.7014	27.6382	28.0545	30.2654	34.5461	38.8193	42.3024	45.0421	47.1668
6.2	27.6936	27.6507	28.095	30.3245	34.606	38.8761	42.357	45.0951	47.2186
6.21	27.6909	27.6661	28.1365	30.3837	34.6659	38.9328	42.4116	45.1481	47.2704
6.22	27.6928	27.6843	28.179	30.443	34.7257	38.9896	42.4661	45.201	47.3222
6.23	27.6988	27.705	28.2223	30.5025	34.7855	39.0462	42.5206	45.2539	47.3739
6.24	27.7085	27.7279	28.2665	30.5621	34.8453	39.1029	42.5751	45.3068	47.4256
6.25	27.7215	27.7531	28.3115	30.6219	34.905	39.1595	42.6296	45.3597	47.4773
6.26	27.7375	27.7802	28.3573	30.6818	34.9647	39.2161	42.684	45.4125	47.5289
6.27	27.7563	27.8091	28.4039	30.7417	35.0243	39.2727	42.7383	45.4653	47.5805
6.28	27.7777	27.8398	28.4511	30.8018	35.0839	39.3292	42.7927	45.5181	47.6321
6.29	27.8013	27.8721	28.499	30.862	35.1435	39.3857	42.847	45.5708	47.6837
6.3	27.8272	27.9059	28.5476	30.9223	35.203	39.4421	42.9013	45.6236	47.7352
6.31	27.855	27.9411	28.5967	30.9826	35.2625	39.4986	42.9556	45.6762	47.7867
6.32	27.8847	27.9776	28.6464	31.043	35.322	39.5549	43.0098	45.7289	47.8382
6.33	27.9162	28.0154	28.6967	31.1036	35.3814	39.6113	43.064	45.7815	47.8897
6.34	27.9492	28.0544	28.7476	31.1641	35.4408	39.6676	43.1182	45.8341	47.9411
6.35	27.9838	28.0945	28.7989	31.2248	35.5001	39.7239	43.1724	45.8867	47.9925
6.36	28.0197	28.1356	28.8507	31.2855	35.5594	39.7802	43.2265	45.9393	48.0439
6.37	28.0571	28.1777	28.903	31.3463	35.6186	39.8364	43.2806	45.9918	48.0952
6.38	28.0956	28.2208	28.9558	31.4071	35.6778	39.8926	43.3346	46.0443	48.1466
6.39	28.1353	28.2648	29.0089	31.468	35.737	39.9488	43.3887	46.0968	48.1979
6.4	28.1762	28.3096	29.0625	31.5289	35.7961	40.0049	43.4427	46.1492	48.2491
6.41	28.2181	28.3552	29.1165	31.5898	35.8552	40.061	43.4966	46.2016	48.3004
6.42	28.261	28.4016	29.1708	31.6508	35.9143	40.117	43.5506	46.254	48.3516
6.43	28.3048	28.4488	29.2255	31.7119	35.9733	40.1731	43.6045	46.3063	48.4028
6.44	28.3495	28.4966	29.2806	31.7729	36.0323	40.2291	43.6584	46.3587	48.4539
6.45	28.3951	28.5451	29.336	31.834	36.0912	40.285	43.7122	46.411	48.5051
6.46	28.4414	28.5942	29.3917	31.8951	36.1501	40.341	43.766	46.4632	48.5562
6.47	28.4886	28.6439	29.4477	31.9563	36.209	40.3969	43.8198	46.5155	48.6073
6.48	28.5364	28.6942	29.5039	32.0174	36.2678	40.4527	43.8736	46.5677	48.6583
6.49	28.5849	28.7451	29.5605	32.0786	36.3265	40.5085	43.9273	46.6199	48.7094
6.5	28.6341	28.7965	29.6173	32.1398	36.3853	40.5644	43.9811	46.672	48.7604
6.51	28.6839	28.8483	29.6744	32.201	36.444	40.6201	44.0347	46.7242	48.8113
6.52	28.7343	28.9007	29.7318	32.2622	36.5026	40.6759	44.0884	46.7763	48.8623
6.53	28.7853	28.9535	29.7893	32.3234	36.5613	40.7316	44.142	46.8284	48.9132
6.54	28.8367	29.0068	29.8471	32.3846	36.6198	40.7872	44.1956	46.8804	48.9641
6.55	28.8887	29.0604	29.9051	32.4458	36.6784	40.8429	44.2491	46.9324	49.015
6.56	28.9412	29.1145	29.9633	32.5071	36.7369	40.8985	44.3027	46.9844	49.0658
6.57	28.9942	29.169	30.0217	32.5683	36.7954	40.9541	44.3562	47.0364	49.1166
6.58	29.0476	29.2238	30.0803	32.6295	36.8538	41.0096	44.4096	47.0883	49.1674
6.59	29.1014	29.279	30.139	32.6907	36.9122	41.0651	44.4631	47.1403	49.2182
6.6	29.1556	29.3345	30.198	32.7519	36.9705	41.1206	44.5165	47.1921	49.2689
6.61	29.2102	29.3903	30.2571	32.8131	37.0288	41.176	44.5699	47.244	49.3196
6.62	29.2652	29.4464	30.3163	32.8742	37.0871	41.2315	44.6233	47.2958	49.3703
6.63	29.3206	29.5028	30.3757	32.9354	37.1454	41.2869	44.6766	47.3477	49.421
6.64	29.3762	29.5595	30.4352	32.9965	37.2035	41.3422	44.7299	47.3994	49.4716
6.65	29.4322	29.6165	30.4949	33.0577	37.2617	41.3975	44.7832	47.4512	49.5222
6.66	29.4885	29.6737	30.5547	33.1188	37.3198	41.4528	44.8364	47.5029	49.5728
6.67	29.5451	29.7312	30.6146	33.1799	37.3779	41.5081	44.8896	47.5546	49.6233
6.68	29.6019	29.7889	30.6746	33.2409	37.4359	41.5633	44.9428	47.6063	49.6739
6.69	29.6591	29.8468	30.7347	33.302	37.494	41.6185	44.996	47.6579	49.7244
6.7	29.7164	29.9049	30.7949	33.363	37.5519	41.6737	45.0491	47.7095	49.7749
6.71	29.774	29.9633	30.8553	33.424	37.6099	41.7288	45.1022	47.7611	49.8253
6.72	29.8319	30.0218	30.9157	33.485	37.6677	41.7839	45.1553	47.8127	49.8757
6.73	29.89	30.0805	30.9762	33.5459	37.7256	41.8389	45.2083	47.8642	49.9261
6.74	29.9482	30.1394	31.0368	33.6069	37.7834	41.894	45.2613	47.9157	49.9765
6.75	30.0067	30.1985	31.0974	33.6678	37.8412	41.949	45.3143	47.9672	50.0268
6.76	30.0654	30.2577	31.1582	33.7286	37.899	42.004	45.3672	48.0186	50.0772
6.77	30.1242	30.317	31.219	33.7895	37.9567	42.0589	45.4202	48.0701	50.1274
6.78	30.1832	30.3766	31.2798	33.8503	38.0143	42.1138	45.4731	48.1215	50.1777
6.79	30.2424	30.4362	31.3407	33.9111	38.072	42.1687	45.5259	48.1728	50.2279
6.8	30.3017	30.496	31.4017	33.9718	38.1296	42.2236	45.5788	48.2242	50.2782
6.81	30.3612	30.5559	31.4627	34.0325	38.1871	42.2784	45.6316	48.2755	50.3283
6.82	30.4208	30.6159	31.5238	34.0932	38.2447	42.3332	45.6844	48.3268	50.3785
6.83	30.4805	30.676	31.5849	34.1538	38.3021	42.3879	45.7371	48.378	50.4286
6.84	30.5404	30.7362	31.6461	34.2145	38.3596	42.4427	45.7899	48.4293	50.4787
6.85	30.6004	30.7966	31.7072	34.275	38.417	42.4973	45.8426	48.4805	50.5288
6.86	30.6605	30.857	31.7685	34.3356	38.4744	42.552	45.8952	48.5317	50.5789
6.87	30.7207	30.9175	31.8297	34.3961	38.5317	42.6067	45.9479	48.5828	50.6289
6.88	30.781	30.9781	31.891	34.4566	38.589	42.6613	46.0005	48.6339	50.6789
6.89	30.8414	31.0388	31.9523	34.517	38.6463	42.7158	46.0531	48.685	50.7289
6.9	30.9018	31.0995	32.0136	34.5774	38.7035	42.7704	46.1056	48.7361	50.7789
6.91	30.9624	31.1603	32.0749	34.6377	38.7607	42.8249	46.1582	48.7872	50.8288
6.92	31.023	31.2212	32.1363	34.6981	38.8179	42.8794	46.2107	48.8382	50.8787
6.93	31.0837	31.2821	32.1977	34.7584	38.875	42.9338	46.2632	48.8892	50.9286
6.94	31.1445	31.3431	32.259	34.8186	38.9321	42.9882	46.3156	48.9402	50.9784
6.95	31.2053	31.4041	32.3204	34.8788	38.9891	43.0426	46.368	48.9911	51.0282
6.96	31.2662	31.4652	32.3818	34.939	39.0461	43.097	46.4204	49.042	51.078
6.97	31.3271	31.5263	32.4432	34.9991	39.1031	43.1513	46.4728	49.0929	51.1278
6.98	31.3881	31.5875	32.5046	35.0592	39.1601	43.2056	46.5251	49.1438	51.1776
6.99	31.4491	31.6487	32.566	35.1192	39.217	43.2599	46.5774	49.1946	51.2273
7	31.5102	31.7099	32.6273	35.1792	39.2739	43.3141	46.6297	49.2454	51.277
7.01	31.5713	31.7711	32.6887	35.2392	39.3307	43.3683	46.6819	49.2962	51.3267
7.02	31.6324	31.8324	32.7501	35.2991	39.3875	43.4225	46.7341	49.3469	51.3763
7.03	31.6936	31.8937	32.8114	35.359	39.4442	43.4766	46.7863	49.3977	51.4259
7.04	31.7548	31.955	32.8728	35.4189	39.501	43.5307	46.8385	49.4484	51.4755
7.05	31.816	32.0164	32.9341	35.4787	39.5577	43.5848	46.8907	49.499	51.5251
7.06	31.8773	32.0777	32.9955	35.5384	39.6144	43.6389	46.9428	49.5497	51.5746
7.07	31.9385	32.1391	33.0568	35.5981	39.671	43.6929	46.9948	49.6003	51.6241
7.08	31.9998	32.2005	33.1181	35.6578	39.7276	43.7469	47.0469	49.6509	51.6736
7.09	32.0611	32.2618	33.1793	35.7175	39.7841	43.8009	47.0989	49.7015	51.7231
7.1	32.1224	32.3232	33.2406	35.7771	39.8406	43.8548	47.1509	49.752	51.7725
7.11	32.1837	32.3846	33.3018	35.8366	39.8971	43.9087	47.2029	49.8025	51.822
7.12	32.245	32.446	33.3631	35.8961	39.9536	43.9626	47.2548	49.853	51.8713
7.13	32.3063	32.5074	33.4242	35.9556	40.01	44.0164	47.3068	49.9035	51.9207
7.14	32.3676	32.5687	33.4854	36.0151	40.0664	44.0702	47.3586	49.9539	51.9701
7.15	32.4289	32.6301	33.5465	36.0744	40.1227	44.124	47.4105	50.0043	52.0194
7.16	32.4902	32.6915	33.6077	36.1338	40.179	44.1778	47.4623	50.0547	52.0686
7.17	32.5515	32.7528	33.6688	36.1931	40.2353	44.2315	47.5141	50.1051	52.1179
7.18	32.6128	32.8142	33.7298	36.2524	40.2916	44.2852	47.5659	50.1554	52.1671
7.19	32.674	32.8755	33.7908	36.3116	40.3478	44.3389	47.6177	50.2057	52.2164
7.2	32.7353	32.9368	33.8518	36.3708	40.404	44.3925	47.6694	50.256	52.2655
7.21	32.7965	32.9981	33.9128	36.4299	40.4601	44.4461	47.7211	50.3062	52.3147
7.22	32.8578	33.0594	33.9737	36.489	40.5162	44.4997	47.7728	50.3565	52.3638
7.23	32.919	33.1206	34.0346	36.5481	40.5723	44.5532	47.8244	50.4067	52.413
7.24	32.9802	33.1818	34.0955	36.6071	40.6283	44.6067	47.876	50.4569	52.462
7.25	33.0414	33.2431	34.1564	36.6661	40.6844	44.6602	47.9276	50.507	52.5111
7.26	33.1025	33.3043	34.2172	36.725	40.7403	44.7137	47.9791	50.5571	52.5601
7.27	33.1637	33.3654	34.2779	36.7839	40.7963	44.7671	48.0307	50.6072	52.6091
7.28	33.2248	33.4266	34.3387	36.8428	40.8522	44.8205	48.0822	50.6573	52.6581
7.29	33.2859	33.4877	34.3994	36.9016	40.908	44.8739	48.1337	50.7073	52.7071
7.3	33.3469	33.5488	34.46	36.9604	40.9639	44.9272	48.1851	50.7574	52.756
7.31	33.408	33.6098	34.5207	37.0191	41.0197	44.9805	48.2365	50.8073	52.8049
7.32	33.469	33.6709	34.5812	37.0778	41.0755	45.0338	48.2879	50.8573	52.8538
7.33	33.5299	33.7319	34.6418	37.1364	41.1312	45.0871	48.3393	50.9072	52.9027
7.34	33.5909	33.7928	34.7023	37.1951	41.1869	45.1403	48.3906	50.9572	52.9515
7.35	33.6518	33.8538	34.7628	37.2536	41.2426	45.1935	48.4419	51.0071	53.0003
7.36	33.7127	33.9147	34.8232	37.3122	41.2982	45.2466	48.4932	51.0569	53.0491
7.37	33.7736	33.9755	34.8836	37.3706	41.3538	45.2998	48.5445	51.1067	53.0978
7.38	33.8344	34.0364	34.944	37.4291	41.4094	45.3529	48.5957	51.1566	53.1466
7.39	33.8952	34.0972	35.0043	37.4875	41.4649	45.406	48.6469	51.2064	53.1953
7.4	33.956	34.1579	35.0645	37.5459	41.5204	45.459	48.6981	51.2561	53.2439
7.41	34.0167	34.2187	35.1248	37.6042	41.5759	45.512	48.7492	51.3058	53.2926
7.42	34.0774	34.2794	35.185	37.6625	41.6313	45.565	48.8004	51.3556	53.3412
7.43	34.138	34.34	35.2451	37.7207	41.6868	45.618	48.8514	51.4052	53.3898
7.44	34.1986	34.4007	35.3052	37.7789	41.7421	45.6709	48.9025	51.4549	53.4384
7.45	34.2592	34.4612	35.3653	37.8371	41.7975	45.7238	48.9536	51.5045	53.487
7.46	34.3198	34.5218	35.4253	37.8952	41.8528	45.7767	49.0046	51.5541	53.5355
7.47	34.3803	34.5823	35.4853	37.9533	41.9081	45.8295	49.0556	51.6037	53.584
7.48	34.4408	34.6428	35.5453	38.0113	41.9633	45.8823	49.1065	51.6532	53.6325
7.49	34.5012	34.7032	35.6052	38.0693	42.0185	45.9351	49.1575	51.7028	53.681
7.5	34.5616	34.7636	35.665	38.1273	42.0737	45.9879	49.2084	51.7523	53.7294
7.51	34.6219	34.824	35.7248	38.1852	42.1288	46.0406	49.2592	51.8017	53.7778
7.52	34.6823	34.8843	35.7846	38.2431	42.184	46.0933	49.3101	51.8512	53.8262
7.53	34.7425	34.9445	35.8443	38.301	42.239	46.146	49.3609	51.9006	53.8745
7.54	34.8028	35.0048	35.904	38.3588	42.2941	46.1986	49.4117	51.95	53.9229
7.55	34.863	35.065	35.9637	38.4165	42.3491	46.2512	49.4625	51.9994	53.9712
7.56	34.9231	35.1251	36.0233	38.4743	42.4041	46.3038	49.5132	52.0487	54.0194
7.57	34.9832	35.1852	36.0829	38.532	42.459	46.3564	49.5639	52.0981	54.0677
7.58	35.0433	35.2453	36.1424	38.5896	42.514	46.4089	49.6146	52.1474	54.1159
7.59	35.1033	35.3053	36.2019	38.6472	42.5688	46.4614	49.6653	52.1966	54.1641
7.6	35.1633	35.3653	36.2613	38.7048	42.6237	46.5139	49.7159	52.2459	54.2123
7.61	35.2233	35.4252	36.3207	38.7623	42.6785	46.5663	49.7666	52.2951	54.2605
7.62	35.2832	35.4851	36.38	38.8198	42.7333	46.6187	49.8171	52.3443	54.3086
7.63	35.3431	35.545	36.4393	38.8773	42.7881	46.6711	49.8677	52.3934	54.3567
7.64	35.4029	35.6048	36.4986	38.9347	42.8428	46.7235	49.9182	52.4426	54.4048
7.65	35.4627	35.6646	36.5578	38.9921	42.8975	46.7758	49.9687	52.4917	54.4529
7.66	35.5224	35.7243	36.617	39.0495	42.9522	46.8281	50.0192	52.5408	54.5009
7.67	35.5821	35.784	36.6761	39.1068	43.0068	46.8804	50.0697	52.5899	54.5489
7.68	35.6418	35.8437	36.7353	39.164	43.0614	46.9326	50.1201	52.6389	54.5969
7.69	35.7014	35.9033	36.7943	39.2213	43.116	46.9848	50.1705	52.6879	54.6449
7.7	35.761	35.9628	36.8533	39.2784	43.1705	47.037	50.2209	52.7369	54.6928
7.71	35.8205	36.0224	36.9123	39.3356	43.225	47.0892	50.2712	52.7859	54.7407
7.72	35.88	36.0818	36.9712	39.3927	43.2795	47.1413	50.3215	52.8348	54.7886
7.73	35.9395	36.1413	37.0301	39.4498	43.3339	47.1934	50.3718	52.8837	54.8365
7.74	35.9989	36.2007	37.0889	39.5069	43.3884	47.2455	50.4221	52.9326	54.8843
7.75	36.0583	36.26	37.1477	39.5639	43.4427	47.2975	50.4723	52.9815	54.9321
7.76	36.1176	36.3193	37.2065	39.6208	43.4971	47.3495	50.5225	53.0303	54.9799
7.77	36.1769	36.3786	37.2652	39.6778	43.5514	47.4015	50.5727	53.0791	55.0277
7.78	36.2361	36.4378	37.3239	39.7347	43.6057	47.4535	50.6229	53.1279	55.0754
7.79	36.2953	36.497	37.3825	39.7915	43.66	47.5054	50.673	53.1767	55.1231
7.8	36.3545	36.5561	37.4411	39.8483	43.7142	47.5573	50.7231	53.2254	55.1708
7.81	36.4136	36.6152	37.4997	39.9051	43.7684	47.6092	50.7732	53.2741	55.2185
7.82	36.4727	36.6743	37.5582	39.9619	43.8225	47.661	50.8233	53.3228	55.2661
7.83	36.5317	36.7333	37.6166	40.0186	43.8767	47.7129	50.8733	53.3715	55.3137
7.84	36.5907	36.7923	37.675	40.0753	43.9308	47.7646	50.9233	53.4201	55.3613
7.85	36.6497	36.8512	37.7334	40.1319	43.9848	47.8164	50.9733	53.4687	55.4089
7.86	36.7086	36.9101	37.7918	40.1885	44.0389	47.8681	51.0232	53.5173	55.4564
7.87	36.7675	36.9689	37.8501	40.2451	44.0929	47.9198	51.0731	53.5658	55.504
7.88	36.8263	37.0277	37.9083	40.3016	44.1468	47.9715	51.123	53.6144	55.5515
7.89	36.8851	37.0865	37.9665	40.3581	44.2008	48.0232	51.1729	53.6629	55.5989
7.9	36.9438	37.1452	38.0247	40.4145	44.2547	48.0748	51.2228	53.7114	55.6464
7.91	37.0025	37.2039	38.0829	40.471	44.3086	48.1264	51.2726	53.7598	55.6938
7.92	37.0612	37.2625	38.141	40.5274	44.3624	48.178	51.3224	53.8083	55.7412
7.93	37.1198	37.3211	38.199	40.5837	44.4163	48.2295	51.3721	53.8567	55.7886
7.94	37.1784	37.3796	38.257	40.64	44.4701	48.281	51.4219	53.9051	55.8359
7.95	37.2369	37.4382	38.315	40.6963	44.5238	48.3325	51.4716	53.9534	55.8832
7.96	37.2954	37.4966	38.373	40.7525	44.5775	48.384	51.5213	54.0018	55.9305
7.97	37.3539	37.5551	38.4308	40.8088	44.6312	48.4354	51.571	54.0501	55.9778
7.98	37.4123	37.6135	38.4887	40.8649	44.6849	48.4868	51.6206	54.0984	56.0251
7.99	37.4707	37.6718	38.5465	40.9211	44.7385	48.5382	51.6702	54.1466	56.0723
8	37.529	37.7301	38.6043	40.9772	44.7922	48.5895	51.7198	54.1949	56.1195
8.01	37.5873	37.7884	38.662	41.0332	44.8457	48.6408	51.7693	54.2431	56.1667
8.02	37.6456	37.8466	38.7197	41.0893	44.8993	48.6921	51.8189	54.2912	56.2138
8.03	37.7038	37.9048	38.7774	41.1452	44.9528	48.7434	51.8684	54.3394	56.261
8.04	37.762	37.9629	38.835	41.2012	45.0063	48.7946	51.9179	54.3875	56.3081
8.05	37.8201	38.021	38.8926	41.2571	45.0597	48.8458	51.9673	54.4357	56.3552
8.06	37.8782	38.0791	38.9501	41.313	45.1132	48.897	52.0167	54.4837	56.4022
8.07	37.9363	38.1371	39.0076	41.3689	45.1666	48.9482	52.0662	54.5318	56.4492
8.08	37.9943	38.1951	39.0651	41.4247	45.2199	48.9993	52.1155	54.5798	56.4963
8.09	38.0523	38.253	39.1225	41.4805	45.2733	49.0504	52.1649	54.6279	56.5433
8.1	38.1102	38.3109	39.1799	41.5362	45.3266	49.1015	52.2142	54.6758	56.5902
8.11	38.1681	38.3688	39.2372	41.592	45.3798	49.1525	52.2635	54.7238	56.6371
8.12	38.226	38.4266	39.2945	41.6476	45.4331	49.2035	52.3128	54.7717	56.6841
8.13	38.2838	38.4844	39.3518	41.7033	45.4863	49.2545	52.362	54.8197	56.731
8.14	38.3416	38.5421	39.409	41.7589	45.5395	49.3055	52.4113	54.8675	56.7778
8.15	38.3993	38.5999	39.4662	41.8145	45.5926	49.3564	52.4605	54.9154	56.8247
8.16	38.457	38.6575	39.5234	41.87	45.6458	49.4073	52.5096	54.9632	56.8715
8.17	38.5147	38.7151	39.5805	41.9255	45.6989	49.4582	52.5588	55.011	56.9183
8.18	38.5723	38.7727	39.6375	41.981	45.7519	49.5091	52.6079	55.0588	56.965
8.19	38.6299	38.8303	39.6946	42.0365	45.805	49.5599	52.657	55.1066	57.0118
8.2	38.6875	38.8878	39.7516	42.0919	45.858	49.6107	52.706	55.1544	57.0585
8.21	38.745	38.9453	39.8085	42.1472	45.911	49.6615	52.7551	55.2021	57.1052
8.22	38.8025	39.0027	39.8655	42.2026	45.9639	49.7122	52.8041	55.2497	57.1519
8.23	38.8599	39.0601	39.9223	42.2579	46.0168	49.7629	52.8531	55.2974	57.1985
8.24	38.9173	39.1174	39.9792	42.3132	46.0697	49.8136	52.9021	55.3451	57.2452
8.25	38.9746	39.1748	40.036	42.3684	46.1226	49.8643	52.951	55.3927	57.2918
8.26	39.032	39.232	40.0928	42.4236	46.1754	49.9149	52.9999	55.4403	57.3384
8.27	39.0892	39.2893	40.1495	42.4788	46.2282	49.9655	53.0488	55.4878	57.3849
8.28	39.1465	39.3465	40.2062	42.5339	46.281	50.0161	53.0977	55.5354	57.4314
8.29	39.2037	39.4036	40.2629	42.589	46.3337	50.0667	53.1465	55.5829	57.478
8.3	39.2609	39.4608	40.3195	42.6441	46.3864	50.1172	53.1953	55.6304	57.5244
8.31	39.318	39.5178	40.3761	42.6992	46.4391	50.1677	53.2441	55.6779	57.5709
8.32	39.3751	39.5749	40.4326	42.7542	46.4918	50.2182	53.2929	55.7253	57.6173
8.33	39.4322	39.6319	40.4891	42.8091	46.5444	50.2686	53.3416	55.7727	57.6638
8.34	39.4892	39.6889	40.5456	42.8641	46.597	50.319	53.3903	55.8201	57.7101
8.35	39.5461	39.7458	40.6021	42.919	46.6495	50.3694	53.439	55.8675	57.7565
8.36	39.6031	39.8027	40.6585	42.9738	46.7021	50.4198	53.4877	55.9149	57.8028
8.37	39.66	39.8596	40.7148	43.0287	46.7546	50.4701	53.5363	55.9622	57.8492
8.38	39.7169	39.9164	40.7712	43.0835	46.807	50.5204	53.5849	56.0095	57.8955
8.39	39.7737	39.9732	40.8275	43.1383	46.8595	50.5707	53.6335	56.0568	57.9417
8.4	39.8305	40.0299	40.8837	43.193	46.9119	50.621	53.6821	56.104	57.988
8.41	39.8873	40.0866	40.9399	43.2477	46.9643	50.6712	53.7306	56.1512	58.0342
8.42	39.944	40.1433	40.9961	43.3024	47.0167	50.7214	53.7791	56.1984	58.0804
8.43	40.0007	40.2	41.0523	43.357	47.069	50.7716	53.8276	56.2456	58.1266
8.44	40.0573	40.2566	41.1084	43.4117	47.1213	50.8218	53.8761	56.2928	58.1727
8.45	40.114	40.3131	41.1645	43.4662	47.1736	50.8719	53.9245	56.3399	58.2189
8.46	40.1705	40.3697	41.2205	43.5208	47.2258	50.922	53.9729	56.387	58.265
8.47	40.2271	40.4262	41.2765	43.5753	47.278	50.9721	54.0213	56.4341	58.3111
8.48	40.2836	40.4826	41.3325	43.6298	47.3302	51.0221	54.0697	56.4811	58.3571
8.49	40.3401	40.539	41.3884	43.6842	47.3824	51.0721	54.118	56.5282	58.4032
8.5	40.3965	40.5954	41.4443	43.7386	47.4345	51.1221	54.1663	56.5752	58.4492
8.51	40.4529	40.6518	41.5002	43.793	47.4866	51.1721	54.2146	56.6222	58.4952
8.52	40.5093	40.7081	41.556	43.8474	47.5387	51.2221	54.2628	56.6691	58.5411
8.53	40.5656	40.7644	41.6118	43.9017	47.5907	51.272	54.3111	56.7161	58.5871
8.54	40.6219	40.8206	41.6676	43.956	47.6427	51.3218	54.3593	56.763	58.633
8.55	40.6781	40.8768	41.7233	44.0102	47.6947	51.3717	54.4075	56.8098	58.6789
8.56	40.7343	40.933	41.779	44.0645	47.7467	51.4216	54.4556	56.8567	58.7248
8.57	40.7905	40.9891	41.8347	44.1186	47.7986	51.4714	54.5037	56.9036	58.7706
8.58	40.8467	41.0452	41.8903	44.1728	47.8505	51.5211	54.5519	56.9504	58.8164
8.59	40.9028	41.1013	41.9459	44.2269	47.9024	51.5709	54.5999	56.9972	58.8622
8.6	40.9589	41.1573	42.0014	44.281	47.9542	51.6206	54.648	57.0439	58.908
8.61	41.0149	41.2133	42.0569	44.3351	48.006	51.6703	54.696	57.0907	58.9537
8.62	41.0709	41.2692	42.1124	44.3891	48.0578	51.72	54.744	57.1374	58.9995
8.63	41.1269	41.3252	42.1679	44.4431	48.1095	51.7697	54.792	57.1841	59.0452
8.64	41.1829	41.3811	42.2233	44.4971	48.1613	51.8193	54.84	57.2308	59.0909
8.65	41.2388	41.4369	42.2787	44.551	48.213	51.8689	54.8879	57.2774	59.1365
8.66	41.2946	41.4927	42.334	44.6049	48.2647	51.9184	54.9358	57.324	59.1822
8.67	41.3505	41.5485	42.3893	44.6588	48.3163	51.968	54.9837	57.3706	59.2278
8.68	41.4063	41.6043	42.4446	44.7126	48.3679	52.0175	55.0316	57.4172	59.2734
8.69	41.462	41.66	42.4998	44.7664	48.4195	52.067	55.0794	57.4638	59.319
8.7	41.5178	41.7156	42.555	44.8202	48.471	52.1165	55.1272	57.5103	59.3645
8.71	41.5735	41.7713	42.6102	44.874	48.5226	52.1659	55.175	57.5568	59.41
8.72	41.6291	41.8269	42.6653	44.9277	48.5741	52.2153	55.2227	57.6033	59.4555
8.73	41.6848	41.8825	42.7205	44.9814	48.6255	52.2647	55.2705	57.6497	59.501
8.74	41.7403	41.938	42.7755	45.035	48.677	52.3141	55.3182	57.6962	59.5464
8.75	41.7959	41.9935	42.8306	45.0887	48.7284	52.3634	55.3659	57.7426	59.5919
8.76	41.8514	42.049	42.8856	45.1422	48.7798	52.4127	55.4135	57.7889	59.6373
8.77	41.9069	42.1044	42.9405	45.1958	48.8312	52.462	55.4612	57.8353	59.6827
8.78	41.9624	42.1598	42.9955	45.2493	48.8825	52.5113	55.5088	57.8817	59.728
8.79	42.0178	42.2152	43.0504	45.3028	48.9338	52.5605	55.5564	57.928	59.7734
8.8	42.0732	42.2705	43.1053	45.3563	48.9851	52.6097	55.6039	57.9743	59.8187
8.81	42.1285	42.3258	43.1601	45.4097	49.0363	52.6589	55.6515	58.0205	59.864
8.82	42.1839	42.3811	43.2149	45.4631	49.0875	52.7081	55.699	58.0668	59.9092
8.83	42.2392	42.4363	43.2697	45.5165	49.1387	52.7572	55.7465	58.113	59.9545
8.84	42.2944	42.4915	43.3244	45.5699	49.1899	52.8063	55.7939	58.1592	59.9997
8.85	42.3496	42.5467	43.3791	45.6232	49.241	52.8554	55.8414	58.2054	60.0449
8.86	42.4048	42.6018	43.4338	45.6765	49.2921	52.9044	55.8888	58.2515	60.0901
8.87	42.46	42.6569	43.4884	45.7297	49.3432	52.9534	55.9362	58.2976	60.1352
8.88	42.5151	42.712	43.543	45.7829	49.3943	53.0024	55.9836	58.3437	60.1803
8.89	42.5702	42.767	43.5976	45.8361	49.4453	53.0514	56.0309	58.3898	60.2255
8.9	42.6253	42.822	43.6521	45.8893	49.4963	53.1004	56.0782	58.4359	60.2705
8.91	42.6803	42.8769	43.7066	45.9424	49.5473	53.1493	56.1255	58.4819	60.3156
8.92	42.7353	42.9319	43.7611	45.9955	49.5982	53.1982	56.1728	58.5279	60.3606
8.93	42.7902	42.9868	43.8156	46.0486	49.6491	53.2471	56.22	58.5739	60.4056
8.94	42.8451	43.0416	43.87	46.1016	49.7	53.2959	56.2672	58.6198	60.4506
8.95	42.9	43.0964	43.9243	46.1546	49.7509	53.3447	56.3144	58.6658	60.4956
8.96	42.9549	43.1512	43.9787	46.2076	49.8017	53.3935	56.3616	58.7117	60.5406
8.97	43.0097	43.206	44.033	46.2605	49.8525	53.4423	56.4087	58.7576	60.5855
8.98	43.0645	43.2607	44.0873	46.3135	49.9033	53.491	56.4559	58.8034	60.6304
8.99	43.1193	43.3154	44.1415	46.3663	49.954	53.5397	56.5029	58.8493	60.6752
9	43.174	43.3701	44.1957	46.4192	50.0048	53.5884	56.55	58.8951	60.7201
9.01	43.2287	43.4247	44.2499	46.472	50.0554	53.6371	56.5971	58.9409	60.7649
9.02	43.2833	43.4793	44.3041	46.5248	50.1061	53.6857	56.6441	58.9866	60.8097
9.03	43.3379	43.5339	44.3582	46.5776	50.1568	53.7343	56.6911	59.0324	60.8545
9.04	43.3925	43.5884	44.4123	46.6303	50.2074	53.7829	56.7381	59.0781	60.8993
9.05	43.4471	43.6429	44.4663	46.683	50.2579	53.8315	56.785	59.1238	60.944
9.06	43.5016	43.6974	44.5203	46.7357	50.3085	53.88	56.8319	59.1695	60.9887
9.07	43.5561	43.7518	44.5743	46.7884	50.359	53.9286	56.8788	59.2152	61.0334
9.08	43.6106	43.8062	44.6283	46.841	50.4095	53.977	56.9257	59.2608	61.0781
9.09	43.665	43.8606	44.6822	46.8935	50.46	54.0255	56.9726	59.3064	61.1228
9.1	43.7194	43.9149	44.7361	46.9461	50.5104	54.0739	57.0194	59.352	61.1674
9.11	43.7738	43.9692	44.79	46.9986	50.5609	54.1223	57.0662	59.3975	61.212
9.12	43.8281	44.0235	44.8438	47.0511	50.6113	54.1707	57.113	59.4431	61.2566
9.13	43.8824	44.0778	44.8976	47.1036	50.6616	54.2191	57.1598	59.4886	61.3011
9.14	43.9367	44.132	44.9513	47.156	50.712	54.2674	57.2065	59.5341	61.3457
9.15	43.9909	44.1861	45.0051	47.2084	50.7623	54.3157	57.2532	59.5795	61.3902
9.16	44.0451	44.2403	45.0588	47.2608	50.8126	54.364	57.2999	59.625	61.4347
9.17	44.0993	44.2944	45.1125	47.3132	50.8628	54.4123	57.3466	59.6704	61.4791
9.18	44.1535	44.3485	45.1661	47.3655	50.913	54.4605	57.3932	59.7158	61.5236
9.19	44.2076	44.4025	45.2197	47.4178	50.9633	54.5087	57.4398	59.7612	61.568
9.2	44.2617	44.4565	45.2733	47.47	51.0134	54.5569	57.4864	59.8065	61.6124
9.21	44.3157	44.5105	45.3268	47.5222	51.0636	54.6051	57.5329	59.8519	61.6568
9.22	44.3697	44.5645	45.3803	47.5744	51.1137	54.6532	57.5795	59.8972	61.7011
9.23	44.4237	44.6184	45.4338	47.6266	51.1638	54.7013	57.626	59.9425	61.7455
9.24	44.4777	44.6723	45.4873	47.6788	51.2139	54.7494	57.6725	59.9877	61.7898
9.25	44.5316	44.7261	45.5407	47.7309	51.2639	54.7974	57.719	60.0329	61.834
9.26	44.5855	44.78	45.5941	47.783	51.3139	54.8455	57.7654	60.0782	61.8783
9.27	44.6393	44.8338	45.6474	47.835	51.3639	54.8935	57.8118	60.1234	61.9226
9.28	44.6932	44.8875	45.7008	47.887	51.4138	54.9415	57.8582	60.1685	61.9668
9.29	44.747	44.9412	45.7541	47.939	51.4638	54.9894	57.9046	60.2137	62.011
9.3	44.8007	44.995	45.8073	47.991	51.5137	55.0374	57.9509	60.2588	62.0551
9.31	44.8544	45.0486	45.8606	48.0429	51.5636	55.0853	57.9973	60.3039	62.0993
9.32	44.9082	45.1022	45.9138	48.0948	51.6134	55.1331	58.0436	60.349	62.1434
9.33	44.9618	45.1559	45.9669	48.1467	51.6632	55.181	58.0899	60.394	62.1875
9.34	45.0155	45.2094	46.0201	48.1986	51.7131	55.2288	58.1361	60.439	62.2316
9.35	45.0691	45.263	46.0732	48.2504	51.7628	55.2766	58.1823	60.484	62.2757
9.36	45.1227	45.3165	46.1263	48.3022	51.8126	55.3244	58.2285	60.529	62.3197
9.37	45.1762	45.37	46.1793	48.3539	51.8623	55.3722	58.2747	60.574	62.3637
9.38	45.2297	45.4234	46.2323	48.4057	51.912	55.4199	58.3209	60.6189	62.4077
9.39	45.2832	45.4768	46.2853	48.4574	51.9616	55.4676	58.367	60.6638	62.4517
9.4	45.3366	45.5302	46.3383	48.5091	52.0113	55.5153	58.4131	60.7087	62.4957
9.41	45.3901	45.5836	46.3912	48.5607	52.0609	55.563	58.4592	60.7536	62.5396
9.42	45.4435	45.6369	46.4441	48.6123	52.1105	55.6106	58.5053	60.7984	62.5835
9.43	45.4968	45.6902	46.497	48.6639	52.16	55.6582	58.5513	60.8432	62.6274
9.44	45.5502	45.7435	46.5498	48.7155	52.2096	55.7058	58.5973	60.888	62.6712
9.45	45.6035	45.7967	46.6026	48.767	52.2591	55.7533	58.6433	60.9328	62.7151
9.46	45.6567	45.8499	46.6554	48.8185	52.3085	55.8009	58.6893	60.9776	62.7589
9.47	45.71	45.9031	46.7081	48.87	52.358	55.8484	58.7353	61.0223	62.8027
9.48	45.7632	45.9562	46.7608	48.9214	52.4074	55.8959	58.7812	61.067	62.8464
9.49	45.8163	46.0093	46.8135	48.9728	52.4568	55.9433	58.8271	61.1117	62.8902
9.5	45.8695	46.0624	46.8662	49.0242	52.5062	55.9907	58.8729	61.1564	62.9339
9.51	45.9226	46.1155	46.9188	49.0756	52.5555	56.0382	58.9188	61.201	62.9776
9.52	45.9757	46.1685	46.9714	49.1269	52.6049	56.0855	58.9646	61.2456	63.0213
9.53	46.0288	46.2214	47.0239	49.1782	52.6542	56.1329	59.0104	61.2902	63.065
9.54	46.0818	46.2744	47.0765	49.2295	52.7034	56.1802	59.0562	61.3348	63.1086
9.55	46.1348	46.3273	47.129	49.2807	52.7527	56.2275	59.102	61.3793	63.1522
9.56	46.1877	46.3802	47.1814	49.3319	52.8019	56.2748	59.1477	61.4238	63.1958
9.57	46.2407	46.4331	47.2339	49.3831	52.8511	56.3221	59.1934	61.4683	63.2394
9.58	46.2936	46.4859	47.2863	49.4343	52.9002	56.3693	59.2391	61.5128	63.2829
9.59	46.3464	46.5387	47.3387	49.4854	52.9494	56.4165	59.2848	61.5573	63.3265
9.6	46.3993	46.5915	47.391	49.5365	52.9985	56.4637	59.3304	61.6017	63.37
9.61	46.4521	46.6443	47.4434	49.5876	53.0476	56.5109	59.376	61.6461	63.4135
9.62	46.5049	46.697	47.4957	49.6386	53.0966	56.558	59.4216	61.6905	63.4569
9.63	46.5576	46.7497	47.5479	49.6897	53.1457	56.6051	59.4672	61.7349	63.5004
9.64	46.6104	46.8023	47.6002	49.7407	53.1947	56.6522	59.5127	61.7792	63.5438
9.65	46.663	46.8549	47.6524	49.7916	53.2437	56.6993	59.5582	61.8235	63.5872
9.66	46.7157	46.9075	47.7045	49.8426	53.2926	56.7463	59.6037	61.8678	63.6305
9.67	46.7683	46.9601	47.7567	49.8935	53.3415	56.7933	59.6492	61.9121	63.6739
9.68	46.821	47.0126	47.8088	49.9443	53.3904	56.8403	59.6947	61.9564	63.7172
9.69	46.8735	47.0651	47.8609	49.9952	53.4393	56.8873	59.7401	62.0006	63.7605
9.7	46.9261	47.1176	47.9129	50.046	53.4882	56.9342	59.7855	62.0448	63.8038
9.71	46.9786	47.1701	47.965	50.0968	53.537	56.9812	59.8309	62.089	63.8471
9.72	47.0311	47.2225	48.017	50.1476	53.5858	57.0281	59.8762	62.1332	63.8903
9.73	47.0835	47.2749	48.0689	50.1983	53.6345	57.0749	59.9216	62.1773	63.9335
9.74	47.1359	47.3272	48.1209	50.249	53.6833	57.1218	59.9669	62.2214	63.9768
9.75	47.1883	47.3795	48.1728	50.2997	53.732	57.1686	60.0122	62.2655	64.0199
9.76	47.2407	47.4318	48.2247	50.3503	53.7807	57.2154	60.0574	62.3096	64.0631
9.77	47.293	47.4841	48.2765	50.401	53.8294	57.2621	60.1027	62.3536	64.1062
9.78	47.3454	47.5363	48.3283	50.4516	53.878	57.3089	60.1479	62.3977	64.1493
9.79	47.3976	47.5885	48.3801	50.5022	53.9266	57.3556	60.1931	62.4417	64.1924
9.8	47.4499	47.6407	48.4319	50.5527	53.9752	57.4023	60.2383	62.4856	64.2355
9.81	47.5021	47.6929	48.4836	50.6032	54.0238	57.449	60.2834	62.5296	64.2785
9.82	47.5543	47.745	48.5353	50.6537	54.0723	57.4956	60.3285	62.5735	64.3215
9.83	47.6064	47.7971	48.587	50.7041	54.1208	57.5423	60.3736	62.6175	64.3645
9.84	47.6586	47.8491	48.6386	50.7546	54.1693	57.5889	60.4187	62.6613	64.4075
9.85	47.7107	47.9012	48.6903	50.805	54.2178	57.6354	60.4638	62.7052	64.4505
9.86	47.7627	47.9532	48.7419	50.8554	54.2662	57.682	60.5088	62.7491	64.4934
9.87	47.8148	48.0051	48.7934	50.9057	54.3146	57.7285	60.5538	62.7929	64.5363
9.88	47.8668	48.0571	48.8449	50.956	54.363	57.775	60.5988	62.8367	64.5792
9.89	47.9188	48.109	48.8965	51.0063	54.4114	57.8215	60.6438	62.8805	64.6221
9.9	47.9707	48.1609	48.9479	51.0566	54.4597	57.868	60.6887	62.9242	64.6649
9.91	48.0227	48.2127	48.9994	51.1068	54.508	57.9144	60.7336	62.968	64.7078
9.92	48.0746	48.2646	49.0508	51.157	54.5563	57.9608	60.7785	63.0117	64.7506
9.93	48.1264	48.3164	49.1022	51.2072	54.6046	58.0072	60.8234	63.0554	64.7933
9.94	48.1783	48.3681	49.1535	51.2574	54.6528	58.0536	60.8682	63.0991	64.8361
9.95	48.2301	48.4199	49.2049	51.3075	54.701	58.0999	60.9131	63.1427	64.8788
9.96	48.2818	48.4716	49.2562	51.3576	54.7492	58.1462	60.9579	63.1863	64.9216
9.97	48.3336	48.5233	49.3074	51.4077	54.7973	58.1925	61.0027	63.2299	64.9643
9.98	48.3853	48.5749	49.3587	51.4577	54.8455	58.2388	61.0474	63.2735	65.0069
9.99	48.437	48.6265	49.4099	51.5078	54.8936	58.285	61.0921	63.3171	65.0496
10	48.4887	48.6781	49.4611	51.5577	54.9416	58.3312	61.1369	63.3606	65.0922
10.01	48.5403	48.7297	49.5122	51.6077	54.9897	58.3774	61.1815	63.4041	65.1348
10.02	48.5919	48.7812	49.5634	51.6577	55.0377	58.4236	61.2262	63.4476	65.1774
10.03	48.6435	48.8327	49.6145	51.7076	55.0857	58.4697	61.2709	63.4911	65.22
10.04	48.6951	48.8842	49.6655	51.7574	55.1337	58.5158	61.3155	63.5345	65.2625
10.05	48.7466	48.9357	49.7166	51.8073	55.1816	58.5619	61.3601	63.578	65.305
10.06	48.7981	48.9871	49.7676	51.8571	55.2296	58.608	61.4046	63.6214	65.3475
10.07	48.8495	49.0385	49.8186	51.9069	55.2775	58.654	61.4492	63.6647	65.39
10.08	48.901	49.0898	49.8695	51.9567	55.3254	58.7001	61.4937	63.7081	65.4325
10.09	48.9524	49.1412	49.9205	52.0065	55.3732	58.7461	61.5382	63.7514	65.4749
10.1	49.0037	49.1925	49.9714	52.0562	55.421	58.7921	61.5827	63.7948	65.5173
10.11	49.0551	49.2438	50.0222	52.1059	55.4688	58.838	61.6272	63.8381	65.5597
10.12	49.1064	49.295	50.0731	52.1555	55.5166	58.8839	61.6716	63.8813	65.6021
10.13	49.1577	49.3462	50.1239	52.2052	55.5643	58.9298	61.716	63.9246	65.6445
10.14	49.209	49.3974	50.1747	52.2548	55.6121	58.9757	61.7604	63.9678	65.6868
10.15	49.2602	49.4486	50.2255	52.3044	55.6598	59.0216	61.8048	64.011	65.7291
10.16	49.3114	49.4997	50.2762	52.3539	55.7074	59.0674	61.8491	64.0542	65.7714
10.17	49.3626	49.5508	50.3269	52.4035	55.7551	59.1132	61.8935	64.0974	65.8136
10.18	49.4138	49.6019	50.3776	52.453	55.8027	59.159	61.9378	64.1405	65.8559
10.19	49.4649	49.653	50.4282	52.5025	55.8503	59.2048	61.982	64.1836	65.8981
10.2	49.516	49.704	50.4789	52.5519	55.8979	59.2505	62.0263	64.2267	65.9403
10.21	49.567	49.755	50.5294	52.6013	55.9454	59.2962	62.0705	64.2698	65.9825
10.22	49.6181	49.806	50.58	52.6507	55.993	59.3419	62.1147	64.3128	66.0246
10.23	49.6691	49.8569	50.6305	52.7001	56.0404	59.3876	62.1589	64.3559	66.0668
10.24	49.7201	49.9078	50.6811	52.7495	56.0879	59.4332	62.2031	64.3989	66.1089
10.25	49.771	49.9587	50.7315	52.7988	56.1354	59.4789	62.2472	64.4419	66.151
10.26	49.822	50.0095	50.782	52.8481	56.1828	59.5245	62.2913	64.4848	66.1931
10.27	49.8728	50.0604	50.8324	52.8973	56.2302	59.57	62.3354	64.5278	66.2351
10.28	49.9237	50.1112	50.8828	52.9466	56.2776	59.6156	62.3795	64.5707	66.2772
10.29	49.9746	50.1619	50.9332	52.9958	56.3249	59.6611	62.4236	64.6136	66.3192
10.3	50.0254	50.2127	50.9835	53.045	56.3722	59.7066	62.4676	64.6565	66.3611
10.31	50.0761	50.2634	51.0338	53.0941	56.4195	59.7521	62.5116	64.6993	66.4031
10.32	50.1269	50.3141	51.0841	53.1433	56.4668	59.7976	62.5556	64.7422	66.4451
10.33	50.1776	50.3647	51.1344	53.1924	56.514	59.843	62.5996	64.785	66.487
10.34	50.2283	50.4153	51.1846	53.2415	56.5613	59.8884	62.6435	64.8278	66.5289
10.35	50.279	50.4659	51.2348	53.2905	56.6085	59.9338	62.6874	64.8705	66.5708
10.36	50.3297	50.5165	51.285	53.3395	56.6556	59.9791	62.7313	64.9133	66.6126
10.37	50.3803	50.5671	51.3351	53.3885	56.7028	60.0245	62.7752	64.956	66.6545
10.38	50.4309	50.6176	51.3853	53.4375	56.7499	60.0698	62.819	64.9987	66.6963
10.39	50.4814	50.6681	51.4354	53.4864	56.797	60.1151	62.8629	65.0414	66.7381
10.4	50.532	50.7185	51.4854	53.5354	56.8441	60.1604	62.9066	65.0841	66.7799
10.41	50.5825	50.769	51.5355	53.5843	56.8911	60.2056	62.9504	65.1267	66.8216
10.42	50.633	50.8194	51.5855	53.6331	56.9382	60.2508	62.9942	65.1693	66.8633
10.43	50.6834	50.8698	51.6355	53.682	56.9852	60.296	63.0379	65.2119	66.9051
10.44	50.7338	50.9201	51.6854	53.7308	57.0321	60.3412	63.0817	65.2545	66.9467
10.45	50.7842	50.9704	51.7354	53.7796	57.0791	60.3864	63.1253	65.297	66.9884
10.46	50.8346	51.0207	51.7853	53.8283	57.126	60.4315	63.169	65.3396	67.0301
10.47	50.8849	51.071	51.8351	53.8771	57.1729	60.4766	63.2127	65.3821	67.0717
10.48	50.9353	51.1212	51.885	53.9258	57.2198	60.5217	63.2563	65.4245	67.1133
10.49	50.9855	51.1715	51.9348	53.9745	57.2666	60.5667	63.2999	65.467	67.1549
10.5	51.0358	51.2216	51.9846	54.0231	57.3135	60.6118	63.3435	65.5095	67.1964
10.51	51.086	51.2718	52.0344	54.0718	57.3603	60.6568	63.387	65.5519	67.238
10.52	51.1362	51.3219	52.0841	54.1204	57.4071	60.7018	63.4306	65.5943	67.2795
10.53	51.1864	51.372	52.1338	54.169	57.4538	60.7467	63.4741	65.6367	67.321
10.54	51.2366	51.4221	52.1835	54.2175	57.5005	60.7917	63.5176	65.679	67.3625
10.55	51.2867	51.4722	52.2332	54.266	57.5472	60.8366	63.5611	65.7214	67.4039
10.56	51.3368	51.5222	52.2828	54.3145	57.5939	60.8815	63.6045	65.7637	67.4454
10.57	51.3868	51.5722	52.3324	54.363	57.6406	60.9264	63.6479	65.8059	67.4868
10.58	51.4369	51.6221	52.382	54.4115	57.6872	60.9712	63.6913	65.8482	67.5282
10.59	51.4869	51.6721	52.4315	54.4599	57.7338	61.0161	63.7347	65.8905	67.5696
10.6	51.5369	51.722	52.481	54.5083	57.7804	61.0609	63.7781	65.9327	67.6109
10.61	51.5868	51.7719	52.5305	54.5566	57.827	61.1056	63.8214	65.9749	67.6523
10.62	51.6368	51.8217	52.58	54.605	57.8735	61.1504	63.8647	66.0171	67.6936
10.63	51.6867	51.8716	52.6294	54.6533	57.92	61.1951	63.908	66.0593	67.7349
10.64	51.7366	51.9214	52.6789	54.7016	57.9665	61.2398	63.9513	66.1014	67.7761
10.65	51.7864	51.9712	52.7283	54.7499	58.013	61.2845	63.9945	66.1435	67.8174
10.66	51.8362	52.0209	52.7776	54.7981	58.0594	61.3292	64.0378	66.1856	67.8586
10.67	51.886	52.0706	52.8269	54.8463	58.1058	61.3738	64.081	66.2277	67.8998
10.68	51.9358	52.1203	52.8763	54.8945	58.1522	61.4185	64.1241	66.2698	67.941
10.69	51.9855	52.17	52.9255	54.9427	58.1986	61.4631	64.1673	66.3118	67.9822
10.7	52.0352	52.2196	52.9748	54.9908	58.2449	61.5076	64.2104	66.3538	68.0233
10.71	52.0849	52.2692	53.024	55.0389	58.2912	61.5522	64.2536	66.3958	68.0644
10.72	52.1346	52.3188	53.0732	55.087	58.3375	61.5967	64.2966	66.4378	68.1056
10.73	52.1842	52.3684	53.1224	55.1351	58.3838	61.6412	64.3397	66.4797	68.1466
10.74	52.2338	52.4179	53.1715	55.1831	58.43	61.6857	64.3828	66.5216	68.1877
10.75	52.2834	52.4674	53.2207	55.2311	58.4762	61.7302	64.4258	66.5636	68.2287
10.76	52.333	52.5169	53.2698	55.2791	58.5224	61.7746	64.4688	66.6055	68.2698
10.77	52.3825	52.5664	53.3188	55.3271	58.5686	61.819	64.5118	66.6473	68.3108
10.78	52.432	52.6158	53.3679	55.375	58.6148	61.8634	64.5548	66.6892	68.3517
10.79	52.4815	52.6652	53.4169	55.4229	58.6609	61.9078	64.5977	66.731	68.3927
10.8	52.5309	52.7146	53.4659	55.4708	58.707	61.9521	64.6406	66.7728	68.4336
10.81	52.5803	52.7639	53.5148	55.5187	58.7531	61.9964	64.6835	66.8146	68.4746
10.82	52.6297	52.8132	53.5638	55.5665	58.7991	62.0407	64.7264	66.8563	68.5155
10.83	52.6791	52.8625	53.6127	55.6143	58.8451	62.085	64.7692	66.8981	68.5563
10.84	52.7284	52.9118	53.6616	55.6621	58.8911	62.1293	64.8121	66.9398	68.5972
10.85	52.7777	52.961	53.7104	55.7099	58.9371	62.1735	64.8549	66.9815	68.638
10.86	52.827	53.0102	53.7592	55.7576	58.9831	62.2177	64.8977	67.0231	68.6788
10.87	52.8763	53.0594	53.808	55.8053	59.029	62.2619	64.9404	67.0648	68.7196
10.88	52.9255	53.1086	53.8568	55.853	59.0749	62.3061	64.9832	67.1064	68.7604
10.89	52.9747	53.1577	53.9056	55.9006	59.1208	62.3502	65.0259	67.148	68.8012
10.9	53.0239	53.2068	53.9543	55.9483	59.1666	62.3943	65.0686	67.1896	68.8419
10.91	53.0731	53.2559	54.003	55.9959	59.2125	62.4384	65.1113	67.2312	68.8826
10.92	53.1222	53.3049	54.0517	56.0434	59.2583	62.4825	65.1539	67.2728	68.9233
10.93	53.1713	53.354	54.1003	56.091	59.3041	62.5265	65.1966	67.3143	68.9639
10.94	53.2204	53.403	54.1489	56.1385	59.3498	62.5706	65.2392	67.3558	69.0046
10.95	53.2694	53.4519	54.1975	56.186	59.3956	62.6146	65.2818	67.3973	69.0452
10.96	53.3184	53.5009	54.2461	56.2335	59.4413	62.6585	65.3243	67.4387	69.0858
10.97	53.3674	53.5498	54.2946	56.2809	59.487	62.7025	65.3669	67.4802	69.1264
10.98	53.4164	53.5987	54.3431	56.3284	59.5326	62.7465	65.4094	67.5216	69.167
10.99	53.4653	53.6476	54.3916	56.3758	59.5783	62.7904	65.4519	67.563	69.2075
11	53.5142	53.6964	54.4401	56.4231	59.6239	62.8342	65.4944	67.6044	69.2481
11.01	53.5631	53.7452	54.4885	56.4705	59.6695	62.8781	65.5369	67.6457	69.2886
11.02	53.612	53.794	54.5369	56.5178	59.7151	62.922	65.5793	67.6871	69.329
11.03	53.6608	53.8428	54.5853	56.5651	59.7606	62.9658	65.6217	67.7284	69.3695
11.04	53.7097	53.8915	54.6337	56.6124	59.8062	63.0096	65.6641	67.7697	69.41
11.05	53.7584	53.9402	54.682	56.6597	59.8516	63.0534	65.7065	67.811	69.4504
11.06	53.8072	53.9889	54.7303	56.7069	59.8971	63.0971	65.7489	67.8522	69.4908
11.07	53.8559	54.0376	54.7786	56.7541	59.9426	63.1409	65.7912	67.8934	69.5312
11.08	53.9046	54.0862	54.8269	56.8013	59.988	63.1846	65.8335	67.9347	69.5715
11.09	53.9533	54.1348	54.8751	56.8484	60.0334	63.2283	65.8758	67.9758	69.6119
11.1	54.002	54.1834	54.9233	56.8955	60.0788	63.2719	65.9181	68.017	69.6522
11.11	54.0506	54.2319	54.9715	56.9426	60.1242	63.3156	65.9603	68.0582	69.6925
11.12	54.0992	54.2805	55.0196	56.9897	60.1695	63.3592	66.0025	68.0993	69.7328
11.13	54.1478	54.329	55.0677	57.0368	60.2148	63.4028	66.0447	68.1404	69.773
11.14	54.1963	54.3774	55.1158	57.0838	60.2601	63.4464	66.0869	68.1815	69.8133
11.15	54.2448	54.4259	55.1639	57.1308	60.3054	63.4899	66.1291	68.2225	69.8535
11.16	54.2933	54.4743	55.212	57.1778	60.3506	63.5335	66.1712	68.2636	69.8937
11.17	54.3418	54.5227	55.26	57.2247	60.3958	63.577	66.2133	68.3046	69.9339
11.18	54.3903	54.5711	55.308	57.2716	60.441	63.6204	66.2554	68.3456	69.974
11.19	54.4387	54.6194	55.3559	57.3185	60.4862	63.6639	66.2975	68.3866	70.0142
11.2	54.4871	54.6677	55.4039	57.3654	60.5313	63.7074	66.3396	68.4276	70.0543
11.21	54.5354	54.716	55.4518	57.4123	60.5765	63.7508	66.3816	68.4685	70.0944
11.22	54.5838	54.7643	55.4997	57.4591	60.6216	63.7942	66.4236	68.5094	70.1345
11.23	54.6321	54.8125	55.5476	57.5059	60.6666	63.8376	66.4656	68.5503	70.1745
11.24	54.6804	54.8608	55.5954	57.5527	60.7117	63.8809	66.5075	68.5912	70.2146
11.25	54.7286	54.9089	55.6432	57.5994	60.7567	63.9242	66.5495	68.6321	70.2546
11.26	54.7769	54.9571	55.691	57.6462	60.8017	63.9676	66.5914	68.6729	70.2946
11.27	54.8251	55.0052	55.7388	57.6929	60.8467	64.0108	66.6333	68.7137	70.3345
11.28	54.8733	55.0534	55.7865	57.7395	60.8917	64.0541	66.6752	68.7545	70.3745
11.29	54.9214	55.1014	55.8342	57.7862	60.9366	64.0973	66.7171	68.7953	70.4144
11.3	54.9696	55.1495	55.8819	57.8328	60.9815	64.1406	66.7589	68.836	70.4544
11.31	55.0177	55.1975	55.9296	57.8794	61.0264	64.1838	66.8007	68.8768	70.4942
11.32	55.0658	55.2455	55.9772	57.926	61.0713	64.2269	66.8425	68.9175	70.5341
11.33	55.1138	55.2935	56.0248	57.9726	61.1161	64.2701	66.8843	68.9582	70.574
11.34	55.1619	55.3415	56.0724	58.0191	61.1609	64.3132	66.926	68.9989	70.6138
11.35	55.2099	55.3894	56.12	58.0656	61.2057	64.3563	66.9678	69.0395	70.6536
11.36	55.2578	55.4373	56.1675	58.1121	61.2505	64.3994	67.0095	69.0801	70.6934
11.37	55.3058	55.4852	56.215	58.1585	61.2953	64.4425	67.0512	69.1208	70.7332
11.38	55.3537	55.5331	56.2625	58.205	61.34	64.4855	67.0928	69.1613	70.7729
11.39	55.4016	55.5809	56.31	58.2514	61.3847	64.5285	67.1345	69.2019	70.8127
11.4	55.4495	55.6287	56.3574	58.2978	61.4294	64.5716	67.1761	69.2425	70.8524
11.41	55.4974	55.6765	56.4048	58.3441	61.474	64.6145	67.2177	69.283	70.8921
11.42	55.5452	55.7242	56.4522	58.3905	61.5187	64.6575	67.2593	69.3235	70.9318
11.43	55.593	55.772	56.4996	58.4368	61.5633	64.7004	67.3009	69.364	70.9714
11.44	55.6408	55.8197	56.5469	58.4831	61.6079	64.7433	67.3424	69.4044	71.011
11.45	55.6885	55.8673	56.5942	58.5293	61.6524	64.7862	67.3839	69.4449	71.0507
11.46	55.7363	55.915	56.6415	58.5756	61.697	64.8291	67.4254	69.4853	71.0903
11.47	55.784	55.9626	56.6887	58.6218	61.7415	64.8719	67.4669	69.5257	71.1298
11.48	55.8316	56.0102	56.736	58.668	61.786	64.9148	67.5084	69.5661	71.1694
11.49	55.8793	56.0578	56.7832	58.7141	61.8305	64.9576	67.5498	69.6065	71.2089
11.5	55.9269	56.1053	56.8304	58.7603	61.8749	65.0003	67.5912	69.6468	71.2484
11.51	55.9745	56.1529	56.8775	58.8064	61.9193	65.0431	67.6326	69.6871	71.2879
11.52	56.0221	56.2004	56.9247	58.8525	61.9637	65.0858	67.674	69.7274	71.3274
11.53	56.0696	56.2478	56.9718	58.8985	62.0081	65.1286	67.7153	69.7677	71.3669
11.54	56.1172	56.2953	57.0189	58.9446	62.0525	65.1712	67.7567	69.808	71.4063
11.55	56.1647	56.3427	57.0659	58.9906	62.0968	65.2139	67.798	69.8482	71.4457
11.56	56.2121	56.3901	57.1129	59.0366	62.1411	65.2566	67.8393	69.8884	71.4851
11.57	56.2596	56.4375	57.16	59.0826	62.1854	65.2992	67.8805	69.9287	71.5245
11.58	56.307	56.4848	57.2069	59.1285	62.2297	65.3418	67.9218	69.9688	71.5638
11.59	56.3544	56.5322	57.2539	59.1744	62.2739	65.3844	67.963	70.009	71.6032
11.6	56.4018	56.5795	57.3008	59.2203	62.3182	65.4269	68.0042	70.0491	71.6425
11.61	56.4491	56.6267	57.3477	59.2662	62.3623	65.4695	68.0454	70.0892	71.6818
11.62	56.4964	56.674	57.3946	59.312	62.4065	65.512	68.0866	70.1293	71.7211
11.63	56.5437	56.7212	57.4415	59.3579	62.4507	65.5545	68.1277	70.1694	71.7603
11.64	56.591	56.7684	57.4883	59.4037	62.4948	65.597	68.1688	70.2095	71.7995
11.65	56.6383	56.8156	57.5351	59.4495	62.5389	65.6394	68.2099	70.2495	71.8388
11.66	56.6855	56.8627	57.5819	59.4952	62.583	65.6818	68.251	70.2895	71.8779
11.67	56.7327	56.9098	57.6287	59.5409	62.627	65.7242	68.2921	70.3295	71.9171
11.68	56.7799	56.9569	57.6754	59.5866	62.6711	65.7666	68.3331	70.3695	71.9563
11.69	56.827	57.004	57.7221	59.6323	62.7151	65.809	68.3741	70.4095	71.9954
11.7	56.8741	57.0511	57.7688	59.678	62.7591	65.8513	68.4151	70.4494	72.0345
11.71	56.9212	57.0981	57.8154	59.7236	62.8031	65.8937	68.4561	70.4893	72.0736
11.72	56.9683	57.1451	57.8621	59.7692	62.847	65.936	68.497	70.5292	72.1127
11.73	57.0153	57.1921	57.9087	59.8148	62.8909	65.9783	68.538	70.5691	72.1518
11.74	57.0624	57.239	57.9553	59.8604	62.9348	66.0205	68.5789	70.6089	72.1908
11.75	57.1094	57.2859	58.0018	59.9059	62.9787	66.0627	68.6198	70.6488	72.2298
11.76	57.1563	57.3328	58.0484	59.9514	63.0226	66.105	68.6607	70.6886	72.2688
11.77	57.2033	57.3797	58.0949	59.9969	63.0664	66.1471	68.7015	70.7284	72.3078
11.78	57.2502	57.4265	58.1414	60.0424	63.1102	66.1893	68.7423	70.7682	72.3468
11.79	57.2971	57.4734	58.1878	60.0878	63.154	66.2315	68.7831	70.8079	72.3857
11.8	57.344	57.5202	58.2343	60.1332	63.1978	66.2736	68.8239	70.8477	72.4246
11.81	57.3908	57.5669	58.2807	60.1786	63.2415	66.3157	68.8647	70.8874	72.4635
11.82	57.4376	57.6137	58.3271	60.224	63.2852	66.3578	68.9054	70.9271	72.5024
11.83	57.4845	57.6604	58.3734	60.2694	63.3289	66.3999	68.9462	70.9668	72.5413
11.84	57.5312	57.7071	58.4198	60.3147	63.3726	66.4419	68.9869	71.0064	72.5801
11.85	57.578	57.7538	58.4661	60.36	63.4162	66.4839	69.0276	71.046	72.6189
11.86	57.6247	57.8004	58.5124	60.4053	63.4599	66.5259	69.0682	71.0857	72.6577
11.87	57.6714	57.8471	58.5587	60.4505	63.5035	66.5679	69.1089	71.1252	72.6965
11.88	57.7181	57.8937	58.6049	60.4957	63.5471	66.6098	69.1495	71.1648	72.7353
11.89	57.7647	57.9402	58.6511	60.541	63.5906	66.6518	69.1901	71.2044	72.774
11.9	57.8113	57.9868	58.6973	60.5861	63.6342	66.6937	69.2307	71.2439	72.8127
11.91	57.858	58.0333	58.7435	60.6313	63.6777	66.7356	69.2712	71.2834	72.8514
11.92	57.9045	58.0798	58.7896	60.6764	63.7212	66.7775	69.3118	71.3229	72.8901
11.93	57.9511	58.1263	58.8357	60.7215	63.7647	66.8193	69.3523	71.3624	72.9288
11.94	57.9976	58.1728	58.8818	60.7666	63.8081	66.8611	69.3928	71.4018	72.9674
11.95	58.0441	58.2192	58.9279	60.8117	63.8515	66.9029	69.4333	71.4413	73.0061
11.96	58.0906	58.2656	58.974	60.8567	63.8949	66.9447	69.4737	71.4807	73.0447
11.97	58.1371	58.312	59.02	60.9017	63.9383	66.9865	69.5142	71.5201	73.0833
11.98	58.1835	58.3583	59.066	60.9467	63.9817	67.0282	69.5546	71.5595	73.1218
11.99	58.2299	58.4046	59.112	60.9917	64.025	67.0699	69.595	71.5988	73.1604
12	58.2763	58.451	59.1579	61.0367	64.0683	67.1116	69.6354	71.6382	73.1989
12.01	58.3226	58.4972	59.2038	61.0816	64.1116	67.1533	69.6757	71.6775	73.2374
12.02	58.369	58.5435	59.2497	61.1265	64.1549	67.195	69.716	71.7168	73.2759
12.03	58.4153	58.5897	59.2956	61.1713	64.1981	67.2366	69.7564	71.7561	73.3144
12.04	58.4616	58.6359	59.3415	61.2162	64.2414	67.2782	69.7966	71.7953	73.3528
12.05	58.5078	58.6821	59.3873	61.261	64.2846	67.3198	69.8369	71.8345	73.3913
12.06	58.554	58.7283	59.4331	61.3058	64.3278	67.3614	69.8772	71.8738	73.4297
12.07	58.6003	58.7744	59.4789	61.3506	64.3709	67.4029	69.9174	71.9129	73.4681
12.08	58.6465	58.8205	59.5246	61.3954	64.4141	67.4445	69.9576	71.9521	73.5064
12.09	58.6926	58.8666	59.5704	61.4401	64.4572	67.486	69.9978	71.9913	73.5448
12.1	58.7388	58.9127	59.6161	61.4848	64.5003	67.5275	70.038	72.0304	73.5831
12.11	58.7849	58.9587	59.6618	61.5295	64.5433	67.5689	70.0781	72.0695	73.6214
12.12	58.831	59.0047	59.7074	61.5742	64.5864	67.6104	70.1183	72.1086	73.6597
12.13	58.877	59.0507	59.7531	61.6188	64.6294	67.6518	70.1584	72.1477	73.698
12.14	58.9231	59.0967	59.7987	61.6634	64.6724	67.6932	70.1985	72.1868	73.7363
12.15	58.9691	59.1426	59.8443	61.708	64.7154	67.7346	70.2385	72.2258	73.7745
12.16	59.0151	59.1886	59.8898	61.7526	64.7583	67.7759	70.2786	72.2648	73.8127
12.17	59.061	59.2345	59.9354	61.7971	64.8013	67.8173	70.3186	72.3038	73.8509
12.18	59.107	59.2803	59.9809	61.8417	64.8442	67.8586	70.3586	72.3428	73.8891
12.19	59.1529	59.3262	60.0264	61.8862	64.8871	67.8999	70.3986	72.3818	73.9273
12.2	59.1988	59.372	60.0718	61.9306	64.93	67.9412	70.4386	72.4207	73.9654
12.21	59.2447	59.4178	60.1173	61.9751	64.9728	67.9824	70.4785	72.4596	74.0035
12.22	59.2905	59.4636	60.1627	62.0195	65.0156	68.0237	70.5185	72.4985	74.0416
12.23	59.3363	59.5093	60.2081	62.0639	65.0584	68.0649	70.5584	72.5374	74.0797
12.24	59.3821	59.555	60.2535	62.1083	65.1012	68.1061	70.5982	72.5763	74.1178
12.25	59.4279	59.6007	60.2988	62.1527	65.144	68.1472	70.6381	72.6151	74.1558
12.26	59.4737	59.6464	60.3442	62.197	65.1867	68.1884	70.678	72.6539	74.1939
12.27	59.5194	59.6921	60.3895	62.2413	65.2294	68.2295	70.7178	72.6927	74.2319
12.28	59.5651	59.7377	60.4348	62.2856	65.2721	68.2706	70.7576	72.7315	74.2699
12.29	59.6108	59.7833	60.48	62.3299	65.3148	68.3117	70.7974	72.7703	74.3078
12.3	59.6564	59.8289	60.5252	62.3742	65.3575	68.3528	70.8371	72.809	74.3458
12.31	59.7021	59.8744	60.5704	62.4184	65.4001	68.3938	70.8769	72.8477	74.3837
12.32	59.7477	59.92	60.6156	62.4626	65.4427	68.4348	70.9166	72.8864	74.4216
12.33	59.7933	59.9655	60.6608	62.5068	65.4853	68.4758	70.9563	72.9251	74.4595
12.34	59.8388	60.011	60.7059	62.5509	65.5279	68.5168	70.996	72.9638	74.4974
12.35	59.8844	60.0564	60.751	62.5951	65.5704	68.5578	71.0357	73.0024	74.5352
12.36	59.9299	60.1019	60.7961	62.6392	65.6129	68.5987	71.0753	73.0411	74.5731
12.37	59.9754	60.1473	60.8412	62.6833	65.6554	68.6396	71.1149	73.0797	74.6109
12.38	60.0208	60.1927	60.8862	62.7273	65.6979	68.6805	71.1545	73.1183	74.6487
12.39	60.0663	60.238	60.9312	62.7714	65.7403	68.7214	71.1941	73.1568	74.6865
12.4	60.1117	60.2834	60.9762	62.8154	65.7828	68.7623	71.2337	73.1954	74.7242
12.41	60.1571	60.3287	61.0212	62.8594	65.8252	68.8031	71.2732	73.2339	74.762
12.42	60.2024	60.374	61.0662	62.9033	65.8676	68.8439	71.3128	73.2724	74.7997
12.43	60.2478	60.4193	61.1111	62.9473	65.9099	68.8847	71.3523	73.3109	74.8374
12.44	60.2931	60.4645	61.156	62.9912	65.9523	68.9255	71.3918	73.3494	74.8751
12.45	60.3384	60.5097	61.2009	63.0351	65.9946	68.9662	71.4312	73.3878	74.9127
12.46	60.3837	60.5549	61.2457	63.079	66.0369	69.007	71.4707	73.4262	74.9504
12.47	60.4289	60.6001	61.2906	63.1229	66.0792	69.0477	71.5101	73.4647	74.988
12.48	60.4742	60.6453	61.3353	63.1667	66.1214	69.0884	71.5495	73.503	75.0256
12.49	60.5194	60.6904	61.3801	63.2105	66.1637	69.1291	71.5889	73.5414	75.0632
12.5	60.5645	60.7355	61.4249	63.2543	66.2059	69.1697	71.6282	73.5798	75.1008
12.51	60.6097	60.7806	61.4696	63.2981	66.2481	69.2103	71.6676	73.6181	75.1383
12.52	60.6548	60.8257	61.5143	63.3418	66.2903	69.2509	71.7069	73.6564	75.1758
12.53	60.7	60.8707	61.559	63.3855	66.3324	69.2915	71.7462	73.6947	75.2134
12.54	60.745	60.9157	61.6037	63.4292	66.3745	69.3321	71.7855	73.733	75.2508
12.55	60.7901	60.9607	61.6483	63.4729	66.4166	69.3726	71.8248	73.7712	75.2883
12.56	60.8351	61.0057	61.693	63.5166	66.4587	69.4132	71.864	73.8095	75.3258
12.57	60.8802	61.0506	61.7376	63.5602	66.5008	69.4537	71.9032	73.8477	75.3632
12.58	60.9252	61.0955	61.7821	63.6038	66.5428	69.4941	71.9424	73.8859	75.4006
12.59	60.9701	61.1404	61.8267	63.6474	66.5848	69.5346	71.9816	73.9241	75.438
12.6	61.0151	61.1853	61.8712	63.691	66.6268	69.575	72.0208	73.9622	75.4754
12.61	61.06	61.2301	61.9157	63.7345	66.6688	69.6155	72.0599	74.0004	75.5128
12.62	61.1049	61.2749	61.9602	63.778	66.7108	69.6559	72.0991	74.0385	75.5501
12.63	61.1498	61.3197	62.0046	63.8215	66.7527	69.6963	72.1382	74.0766	75.5874
12.64	61.1946	61.3645	62.0491	63.865	66.7946	69.7366	72.1772	74.1147	75.6247
12.65	61.2394	61.4093	62.0935	63.9084	66.8365	69.7769	72.2163	74.1527	75.662
12.66	61.2842	61.454	62.1379	63.9519	66.8784	69.8173	72.2554	74.1908	75.6993
12.67	61.329	61.4987	62.1822	63.9952	66.9202	69.8576	72.2944	74.2288	75.7365
12.68	61.3738	61.5434	62.2266	64.0386	66.9621	69.8978	72.3334	74.2668	75.7738
12.69	61.4185	61.5881	62.2709	64.082	67.0038	69.9381	72.3724	74.3048	75.811
12.7	61.4632	61.6327	62.3152	64.1253	67.0456	69.9783	72.4113	74.3428	75.8482
12.71	61.5079	61.6773	62.3595	64.1686	67.0874	70.0186	72.4503	74.3807	75.8854
12.72	61.5526	61.7219	62.4037	64.2119	67.1291	70.0587	72.4892	74.4186	75.9225
12.73	61.5972	61.7665	62.4479	64.2552	67.1709	70.0989	72.5281	74.4566	75.9596
12.74	61.6418	61.811	62.4921	64.2985	67.2125	70.1391	72.567	74.4945	75.9968
12.75	61.6864	61.8555	62.5363	64.3417	67.2542	70.1792	72.6059	74.5323	76.0339
12.76	61.731	61.9	62.5805	64.3849	67.2959	70.2193	72.6447	74.5702	76.0709
12.77	61.7756	61.9445	62.6246	64.4281	67.3375	70.2594	72.6836	74.608	76.108
12.78	61.8201	61.989	62.6687	64.4712	67.3791	70.2995	72.7224	74.6458	76.145
12.79	61.8646	62.0334	62.7128	64.5144	67.4207	70.3395	72.7612	74.6836	76.1821
12.8	61.9091	62.0778	62.7569	64.5575	67.4623	70.3796	72.7999	74.7214	76.2191
12.81	61.9535	62.1222	62.8009	64.6006	67.5038	70.4196	72.8387	74.7592	76.2561
12.82	61.9979	62.1665	62.8449	64.6436	67.5454	70.4596	72.8774	74.7969	76.293
12.83	62.0423	62.2109	62.8889	64.6867	67.5869	70.4995	72.9161	74.8346	76.33
12.84	62.0867	62.2552	62.9329	64.7297	67.6283	70.5395	72.9548	74.8723	76.3669
12.85	62.1311	62.2995	62.9768	64.7727	67.6698	70.5794	72.9935	74.91	76.4038
12.86	62.1754	62.3437	63.0208	64.8157	67.7113	70.6193	73.0321	74.9476	76.4407
12.87	62.2197	62.388	63.0647	64.8586	67.7527	70.6592	73.0708	74.9853	76.4776
12.88	62.264	62.4322	63.1086	64.9016	67.7941	70.6991	73.1094	75.0229	76.5144
12.89	62.3083	62.4764	63.1524	64.9445	67.8354	70.739	73.148	75.0605	76.5513
12.9	62.3526	62.5206	63.1962	64.9874	67.8768	70.7788	73.1865	75.0981	76.5881
12.91	62.3968	62.5647	63.24	65.0302	67.9181	70.8186	73.2251	75.1357	76.6249
12.92	62.441	62.6088	63.2838	65.0731	67.9595	70.8584	73.2636	75.1732	76.6617
12.93	62.4852	62.6529	63.3276	65.1159	68.0007	70.8981	73.3022	75.2108	76.6984
12.94	62.5293	62.697	63.3713	65.1587	68.042	70.9379	73.3407	75.2483	76.7352
12.95	62.5735	62.7411	63.4151	65.2015	68.0833	70.9776	73.3791	75.2857	76.7719
12.96	62.6176	62.7851	63.4588	65.2442	68.1245	71.0173	73.4176	75.3232	76.8086
12.97	62.6617	62.8291	63.5024	65.287	68.1657	71.057	73.456	75.3607	76.8453
12.98	62.7057	62.8731	63.5461	65.3297	68.2069	71.0967	73.4945	75.3981	76.882
12.99	62.7498	62.9171	63.5897	65.3724	68.2481	71.1363	73.5328	75.4355	76.9186
13	62.7938	62.961	63.6333	65.4151	68.2892	71.176	73.5712	75.4729	76.9553
13.01	62.8378	63.0049	63.6769	65.4577	68.3303	71.2156	73.6096	75.5103	76.9919
13.02	62.8817	63.0488	63.7205	65.5003	68.3714	71.2551	73.6479	75.5477	77.0285
13.03	62.9257	63.0927	63.764	65.5429	68.4125	71.2947	73.6863	75.585	77.065
13.04	62.9696	63.1366	63.8075	65.5855	68.4536	71.3343	73.7245	75.6223	77.1016
13.05	63.0135	63.1804	63.851	65.6281	68.4946	71.3738	73.7628	75.6596	77.1381
13.06	63.0574	63.2242	63.8945	65.6706	68.5356	71.4133	73.8011	75.6969	77.1747
13.07	63.1013	63.268	63.938	65.7131	68.5766	71.4528	73.8393	75.7342	77.2112
13.08	63.1451	63.3118	63.9814	65.7556	68.6176	71.4922	73.8776	75.7714	77.2477
13.09	63.1889	63.3555	64.0248	65.7981	68.6586	71.5317	73.9158	75.8086	77.2841
13.1	63.2327	63.3992	64.0682	65.8405	68.6995	71.5711	73.954	75.8458	77.3206
13.11	63.2765	63.4429	64.1115	65.883	68.7404	71.6105	73.9921	75.883	77.357
13.12	63.3202	63.4866	64.1548	65.9254	68.7813	71.6499	74.0303	75.9202	77.3934
13.13	63.3639	63.5302	64.1982	65.9677	68.8222	71.6893	74.0684	75.9574	77.4298
13.14	63.4076	63.5739	64.2415	66.0101	68.863	71.7286	74.1065	75.9945	77.4662
13.15	63.4513	63.6174	64.2847	66.0524	68.9038	71.7679	74.1446	76.0316	77.5025
13.16	63.495	63.661	64.328	66.0948	68.9446	71.8072	74.1827	76.0687	77.5389
13.17	63.5386	63.7046	64.3712	66.1371	68.9854	71.8465	74.2207	76.1058	77.5752
13.18	63.5822	63.7481	64.4144	66.1793	69.0262	71.8858	74.2587	76.1428	77.6115
13.19	63.6258	63.7916	64.4576	66.2216	69.067	71.925	74.2968	76.1799	77.6478
13.2	63.6694	63.8351	64.5007	66.2638	69.1077	71.9643	74.3347	76.2169	77.6841
13.21	63.7129	63.8786	64.5439	66.306	69.1484	72.0035	74.3727	76.2539	77.7203
13.22	63.7564	63.922	64.587	66.3482	69.1891	72.0427	74.4107	76.2909	77.7565
13.23	63.7999	63.9654	64.6301	66.3904	69.2297	72.0818	74.4486	76.3278	77.7927
13.24	63.8434	64.0088	64.6731	66.4325	69.2704	72.121	74.4865	76.3648	77.829
13.25	63.8868	64.0522	64.7162	66.4746	69.311	72.1601	74.5244	76.4017	77.8651
13.26	63.9303	64.0956	64.7592	66.5167	69.3516	72.1992	74.5623	76.4386	77.9013
13.27	63.9737	64.1389	64.8022	66.5588	69.3922	72.2383	74.6001	76.4755	77.9374
13.28	64.017	64.1822	64.8452	66.6009	69.4327	72.2774	74.638	76.5124	77.9735
13.29	64.0604	64.2255	64.8881	66.6429	69.4733	72.3164	74.6758	76.5492	78.0096
13.3	64.1037	64.2688	64.9311	66.6849	69.5138	72.3554	74.7136	76.5861	78.0457
13.31	64.1471	64.312	64.974	66.7269	69.5543	72.3944	74.7514	76.6229	78.0818
13.32	64.1903	64.3552	65.0169	66.7689	69.5948	72.4334	74.7892	76.6597	78.1178
13.33	64.2336	64.3984	65.0597	66.8108	69.6352	72.4724	74.8269	76.6965	78.1539
13.34	64.2769	64.4416	65.1026	66.8528	69.6756	72.5113	74.8646	76.7332	78.1899
13.35	64.3201	64.4848	65.1454	66.8947	69.7161	72.5503	74.9023	76.77	78.2259
13.36	64.3633	64.5279	65.1882	66.9365	69.7565	72.5892	74.94	76.8067	78.2618
13.37	64.4065	64.571	65.231	66.9784	69.7968	72.6281	74.9777	76.8434	78.2978
13.38	64.4496	64.6141	65.2737	67.0203	69.8372	72.6669	75.0153	76.8801	78.3337
13.39	64.4928	64.6572	65.3165	67.0621	69.8775	72.7058	75.053	76.9167	78.3697
13.4	64.5359	64.7002	65.3592	67.1039	69.9178	72.7446	75.0906	76.9534	78.4056
13.41	64.579	64.7432	65.4019	67.1456	69.9581	72.7834	75.1282	76.99	78.4415
13.42	64.6221	64.7862	65.4445	67.1874	69.9984	72.8222	75.1657	77.0266	78.4773
13.43	64.6651	64.8292	65.4872	67.2291	70.0386	72.861	75.2033	77.0632	78.5132
13.44	64.7081	64.8721	65.5298	67.2708	70.0789	72.8997	75.2408	77.0998	78.549
13.45	64.7511	64.9151	65.5724	67.3125	70.1191	72.9385	75.2783	77.1364	78.5848
13.46	64.7941	64.958	65.615	67.3542	70.1592	72.9772	75.3158	77.1729	78.6206
13.47	64.8371	65.0008	65.6575	67.3958	70.1994	73.0159	75.3533	77.2094	78.6564
13.48	64.88	65.0437	65.7001	67.4375	70.2396	73.0545	75.3908	77.2459	78.6921
13.49	64.9229	65.0866	65.7426	67.4791	70.2797	73.0932	75.4282	77.2824	78.7279
13.5	64.9658	65.1294	65.7851	67.5206	70.3198	73.1318	75.4656	77.3189	78.7636
13.51	65.0087	65.1722	65.8275	67.5622	70.3599	73.1704	75.503	77.3553	78.7993
13.52	65.0515	65.2149	65.87	67.6037	70.3999	73.209	75.5404	77.3917	78.835
13.53	65.0943	65.2577	65.9124	67.6453	70.44	73.2476	75.5778	77.4282	78.8707
13.54	65.1371	65.3004	65.9548	67.6868	70.48	73.2862	75.6151	77.4645	78.9063
13.55	65.1799	65.3431	65.9972	67.7282	70.52	73.3247	75.6525	77.5009	78.9419
13.56	65.2227	65.3858	66.0395	67.7697	70.56	73.3632	75.6898	77.5373	78.9776
13.57	65.2654	65.4285	66.0819	67.8111	70.6	73.4017	75.727	77.5736	79.0131
13.58	65.3081	65.4711	66.1242	67.8525	70.6399	73.4402	75.7643	77.6099	79.0487
13.59	65.3508	65.5137	66.1665	67.8939	70.6798	73.4786	75.8016	77.6462	79.0843
13.6	65.3935	65.5563	66.2087	67.9353	70.7197	73.5171	75.8388	77.6825	79.1198
13.61	65.4361	65.5989	66.251	67.9766	70.7596	73.5555	75.876	77.7188	79.1554
13.62	65.4788	65.6415	66.2932	68.0179	70.7994	73.5939	75.9132	77.755	79.1909
13.63	65.5214	65.684	66.3354	68.0593	70.8393	73.6322	75.9504	77.7912	79.2264
13.64	65.564	65.7265	66.3776	68.1005	70.8791	73.6706	75.9875	77.8274	79.2618
13.65	65.6065	65.769	66.4198	68.1418	70.9189	73.709	76.0247	77.8636	79.2973
13.66	65.6491	65.8114	66.4619	68.183	70.9587	73.7473	76.0618	77.8998	79.3327
13.67	65.6916	65.8539	66.504	68.2243	70.9984	73.7856	76.0989	77.936	79.3681
13.68	65.7341	65.8963	66.5461	68.2655	71.0382	73.8238	76.136	77.9721	79.4035
13.69	65.7765	65.9387	66.5882	68.3066	71.0779	73.8621	76.173	78.0082	79.4389
13.7	65.819	65.9811	66.6303	68.3478	71.1176	73.9004	76.2101	78.0443	79.4743
13.71	65.8614	66.0234	66.6723	68.3889	71.1573	73.9386	76.2471	78.0804	79.5096
13.72	65.9038	66.0658	66.7143	68.43	71.1969	73.9768	76.2841	78.1164	79.545
13.73	65.9462	66.1081	66.7563	68.4711	71.2366	74.015	76.3211	78.1525	79.5803
13.74	65.9886	66.1504	66.7983	68.5122	71.2762	74.0531	76.3581	78.1885	79.6156
13.75	66.0309	66.1927	66.8402	68.5533	71.3158	74.0913	76.395	78.2245	79.6508
13.76	66.0732	66.2349	66.8821	68.5943	71.3554	74.1294	76.4319	78.2605	79.6861
13.77	66.1155	66.2771	66.924	68.6353	71.3949	74.1675	76.4689	78.2965	79.7213
13.78	66.1578	66.3193	66.9659	68.6763	71.4344	74.2056	76.5058	78.3324	79.7566
13.79	66.2001	66.3615	67.0078	68.7172	71.474	74.2437	76.5426	78.3684	79.7918
13.8	66.2423	66.4037	67.0496	68.7582	71.5135	74.2817	76.5795	78.4043	79.8269
13.81	66.2845	66.4458	67.0914	68.7991	71.5529	74.3197	76.6163	78.4402	79.8621
13.82	66.3267	66.4879	67.1332	68.84	71.5924	74.3577	76.6531	78.4761	79.8973
13.83	66.3688	66.53	67.175	68.8809	71.6318	74.3957	76.6899	78.5119	79.9324
13.84	66.411	66.5721	67.2167	68.9218	71.6712	74.4337	76.7267	78.5478	79.9675
13.85	66.4531	66.6141	67.2584	68.9626	71.7106	74.4716	76.7635	78.5836	80.0026
13.86	66.4952	66.6562	67.3002	69.0034	71.75	74.5096	76.8002	78.6194	80.0377
13.87	66.5373	66.6982	67.3418	69.0442	71.7893	74.5475	76.837	78.6552	80.0727
13.88	66.5794	66.7401	67.3835	69.085	71.8287	74.5854	76.8737	78.691	80.1078
13.89	66.6214	66.7821	67.4252	69.1257	71.868	74.6233	76.9104	78.7267	80.1428
13.9	66.6634	66.8241	67.4668	69.1665	71.9073	74.6611	76.947	78.7625	80.1778
13.91	66.7054	66.866	67.5084	69.2072	71.9466	74.699	76.9837	78.7982	80.2128
13.92	66.7474	66.9079	67.5499	69.2479	71.9858	74.7368	77.0203	78.8339	80.2478
13.93	66.7893	66.9497	67.5915	69.2886	72.0251	74.7746	77.0569	78.8696	80.2828
13.94	66.8312	66.9916	67.633	69.3292	72.0643	74.8123	77.0935	78.9052	80.3177
13.95	66.8731	67.0334	67.6745	69.3698	72.1035	74.8501	77.1301	78.9409	80.3526
13.96	66.915	67.0752	67.716	69.4104	72.1426	74.8879	77.1667	78.9765	80.3875
13.97	66.9569	67.117	67.7575	69.451	72.1818	74.9256	77.2032	79.0121	80.4224
13.98	66.9987	67.1588	67.799	69.4916	72.2209	74.9633	77.2397	79.0477	80.4573
13.99	67.0405	67.2006	67.8404	69.5321	72.26	75.001	77.2762	79.0833	80.4921
14	67.0824	67.2423	67.8818	69.5727	72.2991	75.0386	77.3127	79.1188	80.527
14.01	67.1241	67.284	67.9232	69.6132	72.3382	75.0763	77.3492	79.1544	80.5618
14.02	67.1659	67.3257	67.9646	69.6537	72.3773	75.1139	77.3856	79.1899	80.5966
14.03	67.2076	67.3673	68.0059	69.6941	72.4163	75.1515	77.4221	79.2254	80.6314
14.04	67.2493	67.409	68.0472	69.7346	72.4553	75.1891	77.4585	79.2609	80.6661
14.05	67.291	67.4506	68.0885	69.775	72.4943	75.2267	77.4949	79.2963	80.7009
14.06	67.3327	67.4922	68.1298	69.8154	72.5333	75.2642	77.5312	79.3318	80.7356
14.07	67.3743	67.5338	68.171	69.8558	72.5722	75.3017	77.5676	79.3672	80.7703
14.08	67.416	67.5753	68.2123	69.8961	72.6112	75.3393	77.6039	79.4026	80.805
14.09	67.4576	67.6168	68.2535	69.9365	72.6501	75.3767	77.6403	79.438	80.8397
14.1	67.4992	67.6584	68.2947	69.9768	72.689	75.4142	77.6766	79.4734	80.8743
14.11	67.5407	67.6998	68.3359	70.0171	72.7279	75.4517	77.7129	79.5088	80.909
14.12	67.5823	67.7413	68.377	70.0573	72.7667	75.4891	77.7491	79.5441	80.9436
14.13	67.6238	67.7828	68.4181	70.0976	72.8055	75.5265	77.7854	79.5794	80.9782
14.14	67.6653	67.8242	68.4593	70.1379	72.8444	75.5639	77.8216	79.6147	81.0128
14.15	67.7067	67.8656	68.5003	70.1781	72.8832	75.6013	77.8578	79.65	81.0474
14.16	67.7482	67.907	68.5414	70.2182	72.9219	75.6387	77.894	79.6853	81.0819
14.17	67.7896	67.9483	68.5825	70.2584	72.9607	75.676	77.9302	79.7206	81.1165
14.18	67.8311	67.9897	68.6235	70.2986	72.9994	75.7133	77.9663	79.7558	81.151
14.19	67.8724	68.031	68.6645	70.3387	73.0381	75.7506	78.0025	79.791	81.1855
14.2	67.9138	68.0723	68.7055	70.3788	73.0768	75.7879	78.0386	79.8262	81.22
14.21	67.9552	68.1136	68.7464	70.4189	73.1155	75.8252	78.0747	79.8614	81.2545
14.22	67.9965	68.1548	68.7874	70.459	73.1542	75.8624	78.1108	79.8966	81.2889
14.23	68.0378	68.1961	68.8283	70.499	73.1928	75.8996	78.1468	79.9317	81.3233
14.24	68.0791	68.2373	68.8692	70.5391	73.2314	75.9369	78.1829	79.9668	81.3577
14.25	68.1203	68.2785	68.9101	70.5791	73.27	75.974	78.2189	80.0019	81.3921
14.26	68.1616	68.3196	68.9509	70.6191	73.3086	76.0112	78.2549	80.037	81.4265
14.27	68.2028	68.3608	68.9917	70.659	73.3472	76.0484	78.2909	80.0721	81.4609
14.28	68.244	68.4019	69.0326	70.699	73.3857	76.0855	78.3269	80.1072	81.4952
14.29	68.2852	68.443	69.0734	70.7389	73.4242	76.1226	78.3628	80.1422	81.5296
14.3	68.3263	68.4841	69.1141	70.7788	73.4627	76.1597	78.3988	80.1772	81.5639
14.31	68.3675	68.5252	69.1549	70.8187	73.5012	76.1968	78.4347	80.2122	81.5982
14.32	68.4086	68.5662	69.1956	70.8586	73.5397	76.2338	78.4706	80.2472	81.6325
14.33	68.4497	68.6072	69.2363	70.8984	73.5781	76.2709	78.5065	80.2822	81.6667
14.34	68.4908	68.6483	69.277	70.9382	73.6165	76.3079	78.5423	80.3171	81.701
14.35	68.5318	68.6892	69.3177	70.978	73.6549	76.3449	78.5782	80.3521	81.7352
14.36	68.5728	68.7302	69.3583	71.0178	73.6933	76.3819	78.614	80.387	81.7694
14.37	68.6138	68.7711	69.3989	71.0576	73.7317	76.4189	78.6498	80.4219	81.8036
14.38	68.6548	68.812	69.4395	71.0973	73.77	76.4558	78.6856	80.4568	81.8377
14.39	68.6958	68.8529	69.4801	71.1371	73.8084	76.4927	78.7214	80.4916	81.8719
14.4	68.7368	68.8938	69.5207	71.1767	73.8466	76.5296	78.7571	80.5265	81.906
14.41	68.7777	68.9347	69.5612	71.2164	73.8849	76.5665	78.7929	80.5613	81.9402
14.42	68.8186	68.9755	69.6017	71.2561	73.9232	76.6034	78.8286	80.5961	81.9743
14.43	68.8595	69.0163	69.6423	71.2957	73.9614	76.6402	78.8643	80.6309	82.0084
14.44	68.9003	69.0571	69.6827	71.3354	73.9997	76.6771	78.9	80.6657	82.0424
14.45	68.9412	69.0979	69.7232	71.375	74.0379	76.7139	78.9357	80.7005	82.0765
14.46	68.982	69.1386	69.7636	71.4145	74.0761	76.7507	78.9713	80.7352	82.1105
14.47	69.0228	69.1793	69.804	71.4541	74.1142	76.7875	79.0069	80.7699	82.1445
14.48	69.0636	69.2201	69.8444	71.4936	74.1524	76.8242	79.0426	80.8046	82.1786
14.49	69.1043	69.2607	69.8848	71.5332	74.1905	76.861	79.0781	80.8393	82.2125
14.5	69.1451	69.3014	69.9252	71.5727	74.2286	76.8977	79.1137	80.874	82.2465
14.51	69.1858	69.3421	69.9655	71.6121	74.2667	76.9344	79.1493	80.9086	82.2805
14.52	69.2265	69.3827	70.0058	71.6516	74.3048	76.9711	79.1848	80.9433	82.3144
14.53	69.2672	69.4233	70.0461	71.691	74.3428	77.0077	79.2203	80.9779	82.3483
14.54	69.3078	69.4639	70.0864	71.7305	74.3809	77.0444	79.2558	81.0125	82.3822
14.55	69.3484	69.5044	70.1266	71.7699	74.4189	77.081	79.2913	81.0471	82.4161
14.56	69.389	69.545	70.1669	71.8092	74.4569	77.1176	79.3268	81.0816	82.45
14.57	69.4296	69.5855	70.2071	71.8486	74.4949	77.1542	79.3623	81.1162	82.4838
14.58	69.4702	69.626	70.2473	71.8879	74.5328	77.1908	79.3977	81.1507	82.5176
14.59	69.5108	69.6665	70.2874	71.9273	74.5708	77.2273	79.4331	81.1852	82.5515
14.6	69.5513	69.7069	70.3276	71.9665	74.6087	77.2639	79.4685	81.2197	82.5853
14.61	69.5918	69.7473	70.3677	72.0058	74.6466	77.3004	79.5039	81.2542	82.619
14.62	69.6323	69.7878	70.4078	72.0451	74.6844	77.3369	79.5392	81.2887	82.6528
14.63	69.6727	69.8282	70.4479	72.0843	74.7223	77.3734	79.5746	81.3231	82.6865
14.64	69.7132	69.8685	70.488	72.1235	74.7601	77.4098	79.6099	81.3576	82.7203
14.65	69.7536	69.9089	70.528	72.1627	74.798	77.4463	79.6452	81.392	82.754
14.66	69.794	69.9492	70.568	72.2019	74.8358	77.4827	79.6805	81.4263	82.7877
14.67	69.8344	69.9895	70.608	72.2411	74.8735	77.5191	79.7158	81.4607	82.8214
14.68	69.8748	70.0298	70.648	72.2802	74.9113	77.5555	79.751	81.4951	82.855
14.69	69.9151	70.0701	70.688	72.3193	74.949	77.5919	79.7863	81.5294	82.8887
14.7	69.9554	70.1103	70.7279	72.3584	74.9868	77.6282	79.8215	81.5637	82.9223
14.71	69.9957	70.1506	70.7678	72.3975	75.0245	77.6646	79.8567	81.5981	82.9559
14.72	70.036	70.1908	70.8077	72.4365	75.0622	77.7009	79.8919	81.6323	82.9895
14.73	70.0763	70.231	70.8476	72.4756	75.0998	77.7372	79.927	81.6666	83.0231
14.74	70.1165	70.2711	70.8875	72.5146	75.1375	77.7734	79.9622	81.7009	83.0566
14.75	70.1567	70.3113	70.9273	72.5536	75.1751	77.8097	79.9973	81.7351	83.0902
14.76	70.1969	70.3514	70.9671	72.5926	75.2127	77.8459	80.0324	81.7693	83.1237
14.77	70.2371	70.3915	71.0069	72.6315	75.2503	77.8822	80.0675	81.8035	83.1572
14.78	70.2772	70.4316	71.0467	72.6705	75.2879	77.9184	80.1026	81.8377	83.1907
14.79	70.3174	70.4717	71.0865	72.7094	75.3254	77.9545	80.1376	81.8719	83.2242
14.8	70.3575	70.5117	71.1262	72.7483	75.363	77.9907	80.1727	81.906	83.2576
14.81	70.3976	70.5517	71.1659	72.7872	75.4005	78.0269	80.2077	81.9402	83.2911
14.82	70.4377	70.5917	71.2056	72.826	75.438	78.063	80.2427	81.9743	83.3245
14.83	70.4777	70.6317	71.2453	72.8649	75.4754	78.0991	80.2777	82.0084	83.3579
14.84	70.5177	70.6717	71.285	72.9037	75.5129	78.1352	80.3127	82.0425	83.3913
14.85	70.5577	70.7116	71.3246	72.9425	75.5503	78.1713	80.3476	82.0765	83.4247
14.86	70.5977	70.7515	71.3642	72.9813	75.5878	78.2073	80.3826	82.1106	83.4581
14.87	70.6377	70.7914	71.4038	73.02	75.6252	78.2434	80.4175	82.1446	83.4914
14.88	70.6777	70.8313	71.4434	73.0588	75.6625	78.2794	80.4524	82.1786	83.5247
14.89	70.7176	70.8712	71.4829	73.0975	75.6999	78.3154	80.4873	82.2126	83.558
14.9	70.7575	70.911	71.5225	73.1362	75.7372	78.3514	80.5221	82.2466	83.5913
14.91	70.7974	70.9508	71.562	73.1749	75.7746	78.3874	80.557	82.2806	83.6246
14.92	70.8373	70.9906	71.6015	73.2135	75.8119	78.4233	80.5918	82.3145	83.6578
14.93	70.8771	71.0304	71.641	73.2522	75.8492	78.4592	80.6266	82.3484	83.6911
14.94	70.9169	71.0702	71.6804	73.2908	75.8864	78.4951	80.6614	82.3824	83.7243
14.95	70.9567	71.1099	71.7198	73.3294	75.9237	78.531	80.6962	82.4163	83.7575
14.96	70.9965	71.1496	71.7592	73.3679	75.9609	78.5669	80.731	82.4501	83.7907
14.97	71.0363	71.1893	71.7986	73.4065	75.9981	78.6028	80.7657	82.484	83.8239
14.98	71.076	71.229	71.838	73.4451	76.0353	78.6386	80.8004	82.5178	83.8571
14.99	71.1158	71.2686	71.8774	73.4836	76.0725	78.6744	80.8351	82.5516	83.8902
15	71.1555	71.3083	71.9167	73.5221	76.1096	78.7102	80.8698	82.5855	83.9233
15.01	71.1952	71.3479	71.956	73.5606	76.1468	78.746	80.9045	82.6192	83.9564
15.02	71.2348	71.3875	71.9953	73.599	76.1839	78.7818	80.9391	82.653	83.9895
15.03	71.2745	71.4271	72.0346	73.6375	76.221	78.8175	80.9738	82.6868	84.0226
15.04	71.3141	71.4666	72.0738	73.6759	76.258	78.8533	81.0084	82.7205	84.0556
15.05	71.3537	71.5062	72.1131	73.7143	76.2951	78.889	81.043	82.7542	84.0887
15.06	71.3933	71.5457	72.1523	73.7527	76.3321	78.9247	81.0776	82.788	84.1217
15.07	71.4328	71.5852	72.1915	73.791	76.3692	78.9604	81.1121	82.8217	84.1547
15.08	71.4724	71.6246	72.2306	73.8294	76.4062	78.996	81.1467	82.8553	84.1877
15.09	71.5119	71.6641	72.2698	73.8677	76.4432	79.0317	81.1812	82.889	84.2207
15.1	71.5514	71.7035	72.3089	73.906	76.4801	79.0673	81.2157	82.9226	84.2536
15.11	71.5909	71.7429	72.348	73.9443	76.5171	79.1029	81.2502	82.9562	84.2866
15.12	71.6304	71.7823	72.3871	73.9826	76.554	79.1385	81.2847	82.9898	84.3195
15.13	71.6698	71.8217	72.4262	74.0208	76.5909	79.174	81.3192	83.0234	84.3524
15.14	71.7092	71.8611	72.4652	74.059	76.6278	79.2096	81.3536	83.057	84.3853
15.15	71.7486	71.9004	72.5043	74.0973	76.6647	79.2451	81.3881	83.0906	84.4182
15.16	71.788	71.9397	72.5433	74.1354	76.7015	79.2806	81.4225	83.1241	84.451
15.17	71.8274	71.979	72.5823	74.1736	76.7383	79.3161	81.4569	83.1576	84.4839
15.18	71.8667	72.0183	72.6212	74.2118	76.7752	79.3516	81.4912	83.1911	84.5167
15.19	71.906	72.0575	72.6602	74.2499	76.812	79.3871	81.5256	83.2246	84.5495
15.2	71.9453	72.0967	72.6991	74.288	76.8487	79.4225	81.5599	83.2581	84.5823
15.21	71.9846	72.1359	72.738	74.3261	76.8855	79.4579	81.5943	83.2915	84.6151
15.22	72.0239	72.1751	72.7769	74.3642	76.9222	79.4934	81.6286	83.325	84.6479
15.23	72.0631	72.2143	72.8158	74.4022	76.959	79.5287	81.6629	83.3584	84.6806
15.24	72.1023	72.2535	72.8546	74.4403	76.9957	79.5641	81.6971	83.3918	84.7133
15.25	72.1415	72.2926	72.8935	74.4783	77.0323	79.5995	81.7314	83.4252	84.746
15.26	72.1807	72.3317	72.9323	74.5163	77.069	79.6348	81.7656	83.4585	84.7787
15.27	72.2199	72.3708	72.9711	74.5542	77.1056	79.6701	81.7999	83.4919	84.8114
15.28	72.259	72.4099	73.0099	74.5922	77.1423	79.7054	81.8341	83.5252	84.8441
15.29	72.2981	72.4489	73.0486	74.6301	77.1789	79.7407	81.8682	83.5585	84.8767
15.3	72.3372	72.4879	73.0873	74.668	77.2155	79.776	81.9024	83.5918	84.9093
15.31	72.3763	72.527	73.1261	74.7059	77.252	79.8112	81.9365	83.6251	84.942
15.32	72.4154	72.566	73.1647	74.7438	77.2886	79.8464	81.9707	83.6584	84.9745
15.33	72.4544	72.6049	73.2034	74.7817	77.3251	79.8816	82.0048	83.6917	85.0071
15.34	72.4934	72.6439	73.2421	74.8195	77.3617	79.9168	82.0389	83.7249	85.0397
15.35	72.5324	72.6828	73.2807	74.8573	77.3982	79.952	82.073	83.7581	85.0722
15.36	72.5714	72.7217	73.3193	74.8951	77.4346	79.9872	82.1071	83.7913	85.1048
15.37	72.6104	72.7606	73.3579	74.9329	77.4711	80.0223	82.1411	83.8245	85.1373
15.38	72.6493	72.7995	73.3965	74.9707	77.5075	80.0574	82.1751	83.8577	85.1698
15.39	72.6882	72.8383	73.435	75.0084	77.544	80.0925	82.2091	83.8908	85.2023
15.4	72.7271	72.8772	73.4736	75.0461	77.5804	80.1276	82.2431	83.924	85.2347
15.41	72.766	72.916	73.5121	75.0838	77.6168	80.1627	82.2771	83.9571	85.2672
15.42	72.8049	72.9548	73.5506	75.1215	77.6531	80.1977	82.3111	83.9902	85.2996
15.43	72.8437	72.9935	73.5891	75.1592	77.6895	80.2328	82.345	84.0233	85.332
15.44	72.8825	73.0323	73.6275	75.1968	77.7258	80.2678	82.379	84.0563	85.3644
15.45	72.9213	73.071	73.6659	75.2345	77.7621	80.3028	82.4129	84.0894	85.3968
15.46	72.9601	73.1097	73.7044	75.2721	77.7984	80.3378	82.4468	84.1224	85.4292
15.47	72.9989	73.1484	73.7428	75.3097	77.8347	80.3727	82.4806	84.1554	85.4615
15.48	73.0376	73.1871	73.7811	75.3472	77.8709	80.4077	82.5145	84.1884	85.4939
15.49	73.0764	73.2258	73.8195	75.3848	77.9072	80.4426	82.5483	84.2214	85.5262
15.5	73.115	73.2644	73.8578	75.4223	77.9434	80.4775	82.5822	84.2544	85.5585
15.51	73.1537	73.303	73.8962	75.4598	77.9796	80.5124	82.616	84.2873	85.5908
15.52	73.1924	73.3416	73.9344	75.4973	78.0158	80.5473	82.6498	84.3203	85.623
15.53	73.231	73.3802	73.9727	75.5348	78.052	80.5821	82.6835	84.3532	85.6553
15.54	73.2697	73.4187	74.011	75.5722	78.0881	80.617	82.7173	84.3861	85.6875
15.55	73.3083	73.4573	74.0492	75.6097	78.1242	80.6518	82.751	84.419	85.7198
15.56	73.3469	73.4958	74.0875	75.6471	78.1603	80.6866	82.7848	84.4518	85.7519
15.57	73.3854	73.5343	74.1256	75.6845	78.1964	80.7214	82.8185	84.4847	85.7841
15.58	73.424	73.5727	74.1638	75.7219	78.2325	80.7562	82.8521	84.5175	85.8163
15.59	73.4625	73.6112	74.202	75.7592	78.2686	80.7909	82.8858	84.5504	85.8485
15.6	73.501	73.6496	74.2401	75.7966	78.3046	80.8256	82.9195	84.5832	85.8806
15.61	73.5395	73.6881	74.2783	75.8339	78.3406	80.8603	82.9531	84.6159	85.9127
15.62	73.5779	73.7264	74.3164	75.8712	78.3766	80.895	82.9867	84.6487	85.9448
15.63	73.6164	73.7648	74.3544	75.9085	78.4126	80.9297	83.0203	84.6815	85.9769
15.64	73.6548	73.8032	74.3925	75.9458	78.4486	80.9644	83.0539	84.7142	86.009
15.65	73.6932	73.8415	74.4306	75.983	78.4845	80.999	83.0875	84.7469	86.0411
15.66	73.7316	73.8799	74.4686	76.0202	78.5205	81.0337	83.1211	84.7796	86.0731
15.67	73.77	73.9181	74.5066	76.0574	78.5564	81.0683	83.1546	84.8123	86.1051
15.68	73.8083	73.9564	74.5446	76.0946	78.5923	81.1029	83.1881	84.845	86.1372
15.69	73.8467	73.9947	74.5825	76.1318	78.6281	81.1374	83.2216	84.8776	86.1692
15.7	73.885	74.0329	74.6205	76.1689	78.664	81.172	83.2551	84.9103	86.2011
15.71	73.9233	74.0712	74.6584	76.2061	78.6998	81.2065	83.2886	84.9429	86.2331
15.72	73.9615	74.1094	74.6963	76.2432	78.7357	81.2411	83.322	84.9755	86.265
15.73	73.9998	74.1475	74.7342	76.2803	78.7715	81.2756	83.3555	85.0081	86.297
15.74	74.038	74.1857	74.7721	76.3174	78.8072	81.3101	83.3889	85.0407	86.3289
15.75	74.0762	74.2238	74.81	76.3544	78.843	81.3445	83.4223	85.0732	86.3608
15.76	74.1144	74.262	74.8478	76.3915	78.8787	81.379	83.4557	85.1058	86.3927
15.77	74.1526	74.3001	74.8856	76.4285	78.9145	81.4134	83.489	85.1383	86.4245
15.78	74.1907	74.3381	74.9234	76.4655	78.9502	81.4478	83.5224	85.1708	86.4564
15.79	74.2289	74.3762	74.9612	76.5024	78.9859	81.4822	83.5557	85.2033	86.4882
15.8	74.267	74.4143	74.9989	76.5394	79.0216	81.5166	83.589	85.2358	86.52
15.81	74.3051	74.4523	75.0366	76.5764	79.0572	81.551	83.6223	85.2682	86.5518
15.82	74.3431	74.4903	75.0744	76.6133	79.0928	81.5853	83.6556	85.3007	86.5836
15.83	74.3812	74.5283	75.1121	76.6502	79.1285	81.6197	83.6889	85.3331	86.6154
15.84	74.4193	74.5662	75.1497	76.6871	79.1641	81.654	83.7221	85.3655	86.6471
15.85	74.4573	74.6042	75.1874	76.7239	79.1996	81.6883	83.7554	85.3979	86.6789
15.86	74.4953	74.6421	75.225	76.7608	79.2352	81.7226	83.7886	85.4303	86.7106
15.87	74.5332	74.68	75.2627	76.7976	79.2708	81.7568	83.8218	85.4626	86.7423
15.88	74.5712	74.7179	75.3003	76.8344	79.3063	81.7911	83.855	85.495	86.774
15.89	74.6091	74.7558	75.3378	76.8712	79.3418	81.8253	83.8881	85.5273	86.8057
15.9	74.6471	74.7936	75.3754	76.908	79.3773	81.8595	83.9213	85.5596	86.8373
15.91	74.685	74.8315	75.4129	76.9448	79.4128	81.8937	83.9544	85.5919	86.869
15.92	74.7228	74.8693	75.4505	76.9815	79.4482	81.9279	83.9875	85.6242	86.9006
15.93	74.7607	74.9071	75.488	77.0182	79.4837	81.962	84.0206	85.6564	86.9322
15.94	74.7985	74.9449	75.5255	77.0549	79.5191	81.9962	84.0537	85.6887	86.9638
15.95	74.8364	74.9826	75.5629	77.0916	79.5545	82.0303	84.0868	85.7209	86.9954
15.96	74.8742	75.0204	75.6004	77.1282	79.5899	82.0644	84.1198	85.7531	87.027
15.97	74.912	75.0581	75.6378	77.1649	79.6252	82.0985	84.1529	85.7853	87.0585
15.98	74.9497	75.0958	75.6752	77.2015	79.6606	82.1326	84.1859	85.8175	87.09
15.99	74.9875	75.1335	75.7126	77.2381	79.6959	82.1666	84.2189	85.8497	87.1216
16	75.0252	75.1711	75.75	77.2747	79.7312	82.2007	84.2519	85.8818	87.1531
16.01	75.0629	75.2087	75.7873	77.3113	79.7665	82.2347	84.2849	85.914	87.1845
16.02	75.1006	75.2464	75.8247	77.3478	79.8018	82.2687	84.3178	85.9461	87.216
16.03	75.1383	75.284	75.862	77.3844	79.8371	82.3027	84.3507	85.9782	87.2475
16.04	75.1759	75.3216	75.8993	77.4209	79.8723	82.3366	84.3837	86.0103	87.2789
16.05	75.2135	75.3591	75.9365	77.4574	79.9075	82.3706	84.4166	86.0423	87.3103
16.06	75.2512	75.3967	75.9738	77.4938	79.9428	82.4045	84.4494	86.0744	87.3417
16.07	75.2887	75.4342	76.011	77.5303	79.9779	82.4385	84.4823	86.1064	87.3731
16.08	75.3263	75.4717	76.0483	77.5667	80.0131	82.4724	84.5152	86.1384	87.4045
16.09	75.3639	75.5092	76.0855	77.6032	80.0483	82.5062	84.548	86.1705	87.4359
16.1	75.4014	75.5466	76.1226	77.6396	80.0834	82.5401	84.5808	86.2024	87.4672
16.11	75.4389	75.5841	76.1598	77.676	80.1185	82.5739	84.6136	86.2344	87.4985
16.12	75.4764	75.6215	76.197	77.7123	80.1536	82.6078	84.6464	86.2664	87.5298
16.13	75.5139	75.6589	76.2341	77.7487	80.1887	82.6416	84.6792	86.2983	87.5611
16.14	75.5514	75.6963	76.2712	77.785	80.2238	82.6754	84.7119	86.3302	87.5924
16.15	75.5888	75.7337	76.3083	77.8213	80.2588	82.7092	84.7446	86.3621	87.6237
16.16	75.6262	75.7711	76.3453	77.8576	80.2938	82.7429	84.7774	86.394	87.6549
16.17	75.6636	75.8084	76.3824	77.8939	80.3289	82.7767	84.8101	86.4259	87.6861
16.18	75.701	75.8457	76.4194	77.9301	80.3638	82.8104	84.8427	86.4578	87.7174
16.19	75.7384	75.883	76.4564	77.9664	80.3988	82.8441	84.8754	86.4896	87.7486
16.2	75.7757	75.9203	76.4934	78.0026	80.4338	82.8778	84.9081	86.5214	87.7798
16.21	75.813	75.9575	76.5304	78.0388	80.4687	82.9115	84.9407	86.5532	87.8109
16.22	75.8504	75.9948	76.5674	78.0749	80.5036	82.9452	84.9733	86.585	87.8421
16.23	75.8876	76.032	76.6043	78.1111	80.5385	82.9788	85.0059	86.6168	87.8732
16.24	75.9249	76.0692	76.6412	78.1472	80.5734	83.0124	85.0385	86.6486	87.9043
16.25	75.9621	76.1064	76.6781	78.1834	80.6083	83.046	85.0711	86.6803	87.9354
16.26	75.9994	76.1436	76.715	78.2195	80.6432	83.0797	85.1036	86.7121	87.9665
16.27	76.0366	76.1807	76.7518	78.2556	80.678	83.1132	85.1362	86.7438	87.9976
16.28	76.0738	76.2178	76.7887	78.2916	80.7128	83.1468	85.1687	86.7755	88.0287
16.29	76.111	76.2549	76.8255	78.3277	80.7476	83.1803	85.2012	86.8072	88.0597
16.3	76.1481	76.292	76.8623	78.3637	80.7824	83.2138	85.2337	86.8388	88.0907
16.31	76.1852	76.3291	76.8991	78.3997	80.8171	83.2474	85.2662	86.8705	88.1218
16.32	76.2224	76.3661	76.9359	78.4357	80.8519	83.2809	85.2986	86.9021	88.1527
16.33	76.2595	76.4032	76.9726	78.4717	80.8866	83.3143	85.3311	86.9337	88.1837
16.34	76.2965	76.4402	77.0093	78.5077	80.9213	83.3478	85.3635	86.9653	88.2147
16.35	76.3336	76.4772	77.046	78.5436	80.956	83.3812	85.3959	86.9969	88.2456
16.36	76.3706	76.5141	77.0827	78.5795	80.9907	83.4146	85.4283	87.0285	88.2766
16.37	76.4077	76.5511	77.1194	78.6154	81.0254	83.4481	85.4607	87.0601	88.3075
16.38	76.4447	76.588	77.1561	78.6513	81.06	83.4814	85.493	87.0916	88.3384
16.39	76.4817	76.625	77.1927	78.6872	81.0946	83.5148	85.5254	87.1231	88.3693
16.4	76.5186	76.6619	77.2293	78.7231	81.1292	83.5482	85.5577	87.1546	88.4002
16.41	76.5556	76.6987	77.2659	78.7589	81.1638	83.5815	85.59	87.1861	88.431
16.42	76.5925	76.7356	77.3025	78.7947	81.1984	83.6149	85.6223	87.2176	88.4619
16.43	76.6294	76.7724	77.3391	78.8305	81.2329	83.6482	85.6546	87.2491	88.4927
16.44	76.6663	76.8093	77.3756	78.8663	81.2675	83.6814	85.6868	87.2805	88.5235
16.45	76.7032	76.8461	77.4121	78.902	81.302	83.7147	85.7191	87.3119	88.5543
16.46	76.74	76.8829	77.4486	78.9378	81.3365	83.748	85.7513	87.3433	88.5851
16.47	76.7769	76.9196	77.4851	78.9735	81.371	83.7812	85.7835	87.3747	88.6159
16.48	76.8137	76.9564	77.5216	79.0092	81.4054	83.8144	85.8157	87.4061	88.6466
16.49	76.8505	76.9931	77.558	79.0449	81.4399	83.8476	85.8479	87.4375	88.6773
16.5	76.8872	77.0298	77.5945	79.0806	81.4743	83.8808	85.88	87.4688	88.7081
16.51	76.924	77.0665	77.6309	79.1162	81.5087	83.914	85.9122	87.5002	88.7388
16.52	76.9608	77.1032	77.6673	79.1518	81.5431	83.9472	85.9443	87.5315	88.7695
16.53	76.9975	77.1398	77.7036	79.1874	81.5775	83.9803	85.9764	87.5628	88.8001
16.54	77.0342	77.1765	77.74	79.223	81.6119	84.0134	86.0085	87.5941	88.8308
16.55	77.0709	77.2131	77.7763	79.2586	81.6462	84.0465	86.0406	87.6254	88.8614
16.56	77.1075	77.2497	77.8127	79.2942	81.6805	84.0796	86.0727	87.6566	88.892
16.57	77.1442	77.2863	77.849	79.3297	81.7148	84.1127	86.1047	87.6879	88.9227
16.58	77.1808	77.3228	77.8852	79.3652	81.7491	84.1458	86.1368	87.7191	88.9532
16.59	77.2174	77.3594	77.9215	79.4008	81.7834	84.1788	86.1688	87.7503	88.9838
16.6	77.254	77.3959	77.9578	79.4362	81.8177	84.2118	86.2008	87.7815	89.0144
16.61	77.2906	77.4324	77.994	79.4717	81.8519	84.2448	86.2328	87.8127	89.045
16.62	77.3271	77.4689	78.0302	79.5072	81.8861	84.2778	86.2647	87.8438	89.0755
16.63	77.3637	77.5054	78.0664	79.5426	81.9203	84.3108	86.2967	87.875	89.106
16.64	77.4002	77.5418	78.1025	79.578	81.9545	84.3437	86.3286	87.9061	89.1365
16.65	77.4367	77.5782	78.1387	79.6134	81.9887	84.3767	86.3606	87.9372	89.167
16.66	77.4732	77.6147	78.1748	79.6488	82.0228	84.4096	86.3925	87.9683	89.1975
16.67	77.5096	77.6511	78.211	79.6842	82.057	84.4425	86.4244	87.9994	89.2279
16.68	77.5461	77.6874	78.2471	79.7195	82.0911	84.4754	86.4562	88.0305	89.2584
16.69	77.5825	77.7238	78.2831	79.7548	82.1252	84.5083	86.4881	88.0615	89.2888
16.7	77.6189	77.7601	78.3192	79.7901	82.1593	84.5411	86.5199	88.0926	89.3192
16.71	77.6553	77.7965	78.3552	79.8254	82.1933	84.574	86.5517	88.1236	89.3496
16.72	77.6917	77.8328	78.3913	79.8607	82.2274	84.6068	86.5836	88.1546	89.38
16.73	77.728	77.8691	78.4273	79.8959	82.2614	84.6396	86.6153	88.1856	89.4103
16.74	77.7643	77.9053	78.4633	79.9312	82.2954	84.6724	86.6471	88.2165	89.4407
16.75	77.8007	77.9416	78.4992	79.9664	82.3294	84.7052	86.6789	88.2475	89.471
16.76	77.837	77.9778	78.5352	80.0016	82.3634	84.7379	86.7106	88.2785	89.5014
16.77	77.8732	78.014	78.5711	80.0368	82.3974	84.7707	86.7424	88.3094	89.5317
16.78	77.9095	78.0502	78.607	80.0719	82.4313	84.8034	86.7741	88.3403	89.5619
16.79	77.9457	78.0864	78.6429	80.1071	82.4652	84.8361	86.8058	88.3712	89.5922
16.8	77.9819	78.1225	78.6788	80.1422	82.4992	84.8688	86.8374	88.4021	89.6225
16.81	78.0182	78.1587	78.7147	80.1773	82.5331	84.9014	86.8691	88.4329	89.6527
16.82	78.0543	78.1948	78.7505	80.2124	82.5669	84.9341	86.9008	88.4638	89.683
16.83	78.0905	78.2309	78.7863	80.2475	82.6008	84.9667	86.9324	88.4946	89.7132
16.84	78.1266	78.267	78.8221	80.2826	82.6346	84.9994	86.964	88.5254	89.7434
16.85	78.1628	78.303	78.8579	80.3176	82.6685	85.032	86.9956	88.5562	89.7736
16.86	78.1989	78.3391	78.8937	80.3526	82.7023	85.0646	87.0272	88.587	89.8037
16.87	78.235	78.3751	78.9295	80.3876	82.7361	85.0971	87.0588	88.6178	89.8339
16.88	78.2711	78.4111	78.9652	80.4226	82.7698	85.1297	87.0903	88.6486	89.864
16.89	78.3071	78.4471	79.0009	80.4576	82.8036	85.1622	87.1218	88.6793	89.8941
16.9	78.3431	78.4831	79.0366	80.4925	82.8373	85.1948	87.1534	88.71	89.9242
16.91	78.3792	78.519	79.0723	80.5275	82.8711	85.2273	87.1849	88.7407	89.9543
16.92	78.4152	78.555	79.1079	80.5624	82.9048	85.2598	87.2164	88.7714	89.9844
16.93	78.4511	78.5909	79.1436	80.5973	82.9385	85.2922	87.2478	88.8021	90.0145
16.94	78.4871	78.6268	79.1792	80.6321	82.9721	85.3247	87.2793	88.8328	90.0445
16.95	78.5231	78.6626	79.2148	80.667	83.0058	85.3572	87.3107	88.8634	90.0746
16.96	78.559	78.6985	79.2504	80.7019	83.0394	85.3896	87.3422	88.8941	90.1046
16.97	78.5949	78.7344	79.286	80.7367	83.073	85.422	87.3736	88.9247	90.1346
16.98	78.6308	78.7702	79.3215	80.7715	83.1066	85.4544	87.405	88.9553	90.1646
16.99	78.6667	78.806	79.3571	80.8063	83.1402	85.4868	87.4364	88.9859	90.1945
17	78.7025	78.8418	79.3926	80.8411	83.1738	85.5191	87.4677	89.0164	90.2245
17.01	78.7383	78.8775	79.4281	80.8758	83.2074	85.5515	87.4991	89.047	90.2544
17.02	78.7742	78.9133	79.4635	80.9106	83.2409	85.5838	87.5304	89.0775	90.2844
17.03	78.81	78.949	79.499	80.9453	83.2744	85.6161	87.5617	89.1081	90.3143
17.04	78.8457	78.9848	79.5345	80.98	83.3079	85.6484	87.593	89.1386	90.3442
17.05	78.8815	79.0205	79.5699	81.0147	83.3414	85.6807	87.6243	89.1691	90.374
17.06	78.9173	79.0561	79.6053	81.0493	83.3749	85.713	87.6556	89.1996	90.4039
17.07	78.953	79.0918	79.6407	81.084	83.4083	85.7452	87.6868	89.23	90.4338
17.08	78.9887	79.1274	79.676	81.1186	83.4417	85.7774	87.7181	89.2605	90.4636
17.09	79.0244	79.1631	79.7114	81.1532	83.4752	85.8097	87.7493	89.2909	90.4934
17.1	79.0601	79.1987	79.7467	81.1878	83.5086	85.8419	87.7805	89.3213	90.5232
17.11	79.0957	79.2343	79.782	81.2224	83.5419	85.874	87.8117	89.3517	90.553
17.12	79.1313	79.2698	79.8174	81.257	83.5753	85.9062	87.8428	89.3821	90.5828
17.13	79.167	79.3054	79.8526	81.2915	83.6087	85.9384	87.874	89.4125	90.6125
17.14	79.2026	79.3409	79.8879	81.326	83.642	85.9705	87.9052	89.4429	90.6423
17.15	79.2382	79.3764	79.9231	81.3606	83.6753	86.0026	87.9363	89.4732	90.672
17.16	79.2737	79.4119	79.9584	81.395	83.7086	86.0347	87.9674	89.5035	90.7018
17.17	79.3093	79.4474	79.9936	81.4295	83.7419	86.0668	87.9985	89.5338	90.7314
17.18	79.3448	79.4829	80.0288	81.464	83.7752	86.0989	88.0296	89.5641	90.7611
17.19	79.3803	79.5183	80.0639	81.4984	83.8084	86.1309	88.0606	89.5944	90.7908
17.2	79.4158	79.5538	80.0991	81.5328	83.8417	86.163	88.0917	89.6247	90.8205
17.21	79.4513	79.5892	80.1342	81.5673	83.8749	86.195	88.1227	89.6549	90.8501
17.22	79.4867	79.6246	80.1694	81.6016	83.9081	86.227	88.1537	89.6852	90.8797
17.23	79.5222	79.6599	80.2045	81.636	83.9412	86.259	88.1847	89.7154	90.9094
17.24	79.5576	79.6953	80.2395	81.6704	83.9744	86.2909	88.2157	89.7456	90.939
17.25	79.593	79.7306	80.2746	81.7047	84.0075	86.3229	88.2467	89.7758	90.9685
17.26	79.6284	79.766	80.3097	81.739	84.0407	86.3548	88.2776	89.8059	90.9981
17.27	79.6637	79.8012	80.3447	81.7733	84.0738	86.3868	88.3086	89.8361	91.0276
17.28	79.6991	79.8365	80.3797	81.8076	84.1069	86.4187	88.3395	89.8663	91.0572
17.29	79.7344	79.8718	80.4147	81.8419	84.14	86.4506	88.3704	89.8964	91.0867
17.3	79.7697	79.907	80.4497	81.8761	84.173	86.4825	88.4013	89.9265	91.1162
17.31	79.805	79.9423	80.4846	81.9103	84.2061	86.5143	88.4322	89.9566	91.1457
17.32	79.8403	79.9775	80.5196	81.9446	84.2391	86.5461	88.4631	89.9867	91.1752
17.33	79.8756	80.0127	80.5545	81.9788	84.2721	86.578	88.4939	90.0168	91.2047
17.34	79.9108	80.0479	80.5894	82.0129	84.3051	86.6098	88.5247	90.0468	91.2341
17.35	79.946	80.083	80.6243	82.0471	84.3381	86.6416	88.5555	90.0768	91.2635
17.36	79.9812	80.1182	80.6592	82.0812	84.3711	86.6734	88.5863	90.1069	91.293
17.37	80.0164	80.1533	80.694	82.1154	84.404	86.7051	88.6171	90.1369	91.3224
17.38	80.0516	80.1884	80.7289	82.1495	84.437	86.7369	88.6479	90.1669	91.3518
17.39	80.0867	80.2235	80.7637	82.1836	84.4699	86.7686	88.6787	90.1968	91.3811
17.4	80.1219	80.2585	80.7985	82.2176	84.5028	86.8003	88.7094	90.2268	91.4105
17.41	80.157	80.2936	80.8333	82.2517	84.5357	86.832	88.7401	90.2568	91.4398
17.42	80.1921	80.3286	80.868	82.2857	84.5685	86.8637	88.7708	90.2867	91.4692
17.43	80.2272	80.3636	80.9028	82.3198	84.6014	86.8954	88.8015	90.3166	91.4985
17.44	80.2622	80.3986	80.9375	82.3538	84.6342	86.927	88.8322	90.3465	91.5278
17.45	80.2973	80.4336	80.9722	82.3878	84.667	86.9587	88.8629	90.3764	91.5571
17.46	80.3323	80.4686	81.0069	82.4217	84.6998	86.9903	88.8935	90.4063	91.5863
17.47	80.3673	80.5035	81.0416	82.4557	84.7326	87.0219	88.9241	90.4361	91.6156
17.48	80.4023	80.5385	81.0763	82.4896	84.7653	87.0535	88.9548	90.466	91.6449
17.49	80.4373	80.5734	81.1109	82.5235	84.7981	87.0851	88.9853	90.4958	91.6741
17.5	80.4722	80.6083	81.1455	82.5574	84.8308	87.1166	89.0159	90.5256	91.7033
17.51	80.5072	80.6431	81.1801	82.5913	84.8636	87.1482	89.0465	90.5554	91.7325
17.52	80.5421	80.678	81.2147	82.6252	84.8962	87.1797	89.077	90.5852	91.7617
17.53	80.577	80.7128	81.2493	82.659	84.9289	87.2112	89.1076	90.615	91.7909
17.54	80.6119	80.7476	81.2839	82.6929	84.9616	87.2427	89.1381	90.6447	91.82
17.55	80.6467	80.7824	81.3184	82.7267	84.9942	87.2742	89.1686	90.6745	91.8491
17.56	80.6816	80.8172	81.3529	82.7605	85.0269	87.3056	89.1991	90.7042	91.8783
17.57	80.7164	80.852	81.3874	82.7943	85.0595	87.3371	89.2296	90.7339	91.9074
17.58	80.7512	80.8868	81.4219	82.8281	85.0921	87.3685	89.2601	90.7636	91.9365
17.59	80.786	80.9215	81.4564	82.8618	85.1247	87.3999	89.2905	90.7933	91.9656
17.6	80.8208	80.9562	81.4908	82.8955	85.1572	87.4313	89.3209	90.8229	91.9946
17.61	80.8556	80.9909	81.5252	82.9292	85.1898	87.4627	89.3513	90.8526	92.0237
17.62	80.8903	81.0256	81.5597	82.9629	85.2223	87.4941	89.3817	90.8822	92.0527
17.63	80.925	81.0602	81.594	82.9966	85.2548	87.5254	89.4121	90.9118	92.0817
17.64	80.9597	81.0949	81.6284	83.0303	85.2873	87.5567	89.4425	90.9414	92.1107
17.65	80.9944	81.1295	81.6628	83.0639	85.3198	87.5881	89.4728	90.971	92.1397
17.66	81.0291	81.1641	81.6971	83.0976	85.3523	87.6194	89.5032	91.0006	92.1687
17.67	81.0638	81.1987	81.7315	83.1312	85.3847	87.6506	89.5335	91.0302	92.1977
17.68	81.0984	81.2333	81.7658	83.1648	85.4172	87.6819	89.5638	91.0597	92.2266
17.69	81.133	81.2678	81.8001	83.1983	85.4496	87.7132	89.5941	91.0892	92.2556
17.7	81.1676	81.3024	81.8343	83.2319	85.482	87.7444	89.6244	91.1188	92.2845
17.71	81.2022	81.3369	81.8686	83.2654	85.5144	87.7756	89.6547	91.1483	92.3134
17.72	81.2368	81.3714	81.9028	83.299	85.5468	87.8068	89.6849	91.1777	92.3423
17.73	81.2713	81.4059	81.9371	83.3325	85.5791	87.838	89.7151	91.2072	92.3712
17.74	81.3059	81.4404	81.9713	83.366	85.6115	87.8692	89.7453	91.2367	92.4
17.75	81.3404	81.4748	82.0054	83.3995	85.6438	87.9004	89.7755	91.2661	92.4289
17.76	81.3749	81.5092	82.0396	83.4329	85.6761	87.9315	89.8057	91.2955	92.4577
17.77	81.4094	81.5437	82.0738	83.4664	85.7084	87.9626	89.8359	91.325	92.4865
17.78	81.4438	81.5781	82.1079	83.4998	85.7406	87.9938	89.8661	91.3543	92.5153
17.79	81.4783	81.6124	82.142	83.5332	85.7729	88.0249	89.8962	91.3837	92.5441
17.8	81.5127	81.6468	82.1761	83.5666	85.8051	88.0559	89.9263	91.4131	92.5729
17.81	81.5471	81.6812	82.2102	83.6	85.8374	88.087	89.9564	91.4424	92.6017
17.82	81.5815	81.7155	82.2443	83.6333	85.8696	88.1181	89.9865	91.4718	92.6304
17.83	81.6159	81.7498	82.2783	83.6667	85.9018	88.1491	90.0166	91.5011	92.6592
17.84	81.6502	81.7841	82.3124	83.7	85.9339	88.1801	90.0467	91.5304	92.6879
17.85	81.6846	81.8184	82.3464	83.7333	85.9661	88.2111	90.0767	91.5597	92.7166
17.86	81.7189	81.8526	82.3804	83.7666	85.9982	88.2421	90.1068	91.589	92.7453
17.87	81.7532	81.8869	82.4143	83.7998	86.0303	88.2731	90.1368	91.6183	92.774
17.88	81.7875	81.9211	82.4483	83.8331	86.0624	88.3041	90.1668	91.6475	92.8026
17.89	81.8217	81.9553	82.4823	83.8663	86.0945	88.335	90.1968	91.6767	92.8313
17.9	81.856	81.9895	82.5162	83.8996	86.1266	88.3659	90.2267	91.706	92.8599
17.91	81.8902	82.0237	82.5501	83.9328	86.1587	88.3968	90.2567	91.7352	92.8885
17.92	81.9244	82.0578	82.584	83.966	86.1907	88.4277	90.2866	91.7643	92.9171
17.93	81.9587	82.092	82.6179	83.9991	86.2228	88.4586	90.3166	91.7935	92.9457
17.94	81.9928	82.1261	82.6517	84.0323	86.2548	88.4895	90.3465	91.8227	92.9743
17.95	82.027	82.1602	82.6856	84.0654	86.2868	88.5203	90.3764	91.8518	93.0028
17.96	82.0611	82.1943	82.7194	84.0985	86.3187	88.5512	90.4063	91.881	93.0314
17.97	82.0953	82.2283	82.7532	84.1316	86.3507	88.582	90.4361	91.9101	93.0599
17.98	82.1294	82.2624	82.787	84.1647	86.3826	88.6128	90.466	91.9392	93.0884
17.99	82.1635	82.2964	82.8208	84.1978	86.4146	88.6436	90.4958	91.9683	93.117
18	82.1976	82.3304	82.8545	84.2309	86.4465	88.6743	90.5257	91.9973	93.1454
18.01	82.2316	82.3645	82.8883	84.2639	86.4784	88.7051	90.5555	92.0264	93.1739
18.02	82.2657	82.3984	82.922	84.2969	86.5103	88.7358	90.5853	92.0555	93.2024
18.03	82.2997	82.4324	82.9557	84.3299	86.5422	88.7665	90.615	92.0845	93.2308
18.04	82.3337	82.4663	82.9894	84.3629	86.574	88.7973	90.6448	92.1135	93.2592
18.05	82.3677	82.5003	83.0231	84.3959	86.6058	88.828	90.6746	92.1425	93.2877
18.06	82.4017	82.5342	83.0567	84.4288	86.6376	88.8586	90.7043	92.1715	93.3161
18.07	82.4356	82.5681	83.0904	84.4618	86.6694	88.8893	90.734	92.2005	93.3445
18.08	82.4696	82.602	83.124	84.4947	86.7012	88.9199	90.7637	92.2294	93.3728
18.09	82.5035	82.6358	83.1576	84.5276	86.733	88.9506	90.7934	92.2584	93.4012
18.1	82.5374	82.6697	83.1912	84.5605	86.7648	88.9812	90.8231	92.2873	93.4296
18.11	82.5713	82.7035	83.2247	84.5934	86.7965	89.0118	90.8527	92.3162	93.4579
18.12	82.6052	82.7373	83.2583	84.6262	86.8282	89.0424	90.8824	92.3451	93.4862
18.13	82.639	82.7711	83.2918	84.659	86.8599	89.073	90.912	92.374	93.5145
18.14	82.6729	82.8049	83.3253	84.6919	86.8916	89.1035	90.9416	92.4029	93.5428
18.15	82.7067	82.8386	83.3588	84.7247	86.9233	89.134	90.9712	92.4317	93.5711
18.16	82.7405	82.8724	83.3923	84.7575	86.9549	89.1646	91.0008	92.4605	93.5993
18.17	82.7743	82.9061	83.4258	84.7902	86.9866	89.1951	91.0304	92.4894	93.6276
18.18	82.8081	82.9398	83.4592	84.823	87.0182	89.2256	91.0599	92.5182	93.6558
18.19	82.8418	82.9735	83.4927	84.8557	87.0498	89.256	91.0895	92.547	93.684
18.2	82.8756	83.0072	83.5261	84.8884	87.0814	89.2865	91.119	92.5758	93.7122
18.21	82.9093	83.0408	83.5595	84.9211	87.113	89.317	91.1485	92.6045	93.7404
18.22	82.943	83.0745	83.5929	84.9538	87.1446	89.3474	91.178	92.6333	93.7686
18.23	82.9767	83.1081	83.6262	84.9865	87.1761	89.3778	91.2075	92.662	93.7968
18.24	83.0103	83.1417	83.6596	85.0192	87.2076	89.4082	91.237	92.6907	93.8249
18.25	83.044	83.1753	83.6929	85.0518	87.2391	89.4386	91.2664	92.7195	93.853
18.26	83.0776	83.2089	83.7262	85.0844	87.2707	89.469	91.2959	92.7482	93.8812
18.27	83.1112	83.2424	83.7595	85.117	87.3021	89.4993	91.3253	92.7768	93.9093
18.28	83.1448	83.276	83.7928	85.1496	87.3336	89.5297	91.3547	92.8055	93.9374
18.29	83.1784	83.3095	83.8261	85.1822	87.365	89.56	91.3841	92.8342	93.9654
18.3	83.212	83.343	83.8593	85.2147	87.3965	89.5903	91.4134	92.8628	93.9935
18.31	83.2455	83.3765	83.8925	85.2473	87.4279	89.6206	91.4428	92.8914	94.0216
18.32	83.2791	83.4099	83.9258	85.2798	87.4593	89.6509	91.4722	92.92	94.0496
18.33	83.3126	83.4434	83.959	85.3123	87.4907	89.6811	91.5015	92.9486	94.0776
18.34	83.3461	83.4768	83.9921	85.3448	87.5221	89.7114	91.5308	92.9772	94.1056
18.35	83.3796	83.5102	84.0253	85.3773	87.5534	89.7416	91.5601	93.0058	94.1336
18.36	83.413	83.5436	84.0584	85.4097	87.5848	89.7718	91.5894	93.0343	94.1616
18.37	83.4465	83.577	84.0916	85.4422	87.6161	89.802	91.6187	93.0629	94.1895
18.38	83.4799	83.6104	84.1247	85.4746	87.6474	89.8322	91.6479	93.0914	94.2175
18.39	83.5133	83.6438	84.1578	85.507	87.6787	89.8624	91.6772	93.1199	94.2454
18.4	83.5467	83.6771	84.1909	85.5394	87.71	89.8925	91.7064	93.1484	94.2734
18.41	83.5801	83.7104	84.2239	85.5718	87.7412	89.9227	91.7356	93.1769	94.3013
18.42	83.6135	83.7437	84.257	85.6041	87.7725	89.9528	91.7648	93.2053	94.3292
18.43	83.6468	83.777	84.29	85.6365	87.8037	89.9829	91.794	93.2338	94.3571
18.44	83.6801	83.8103	84.323	85.6688	87.8349	90.013	91.8232	93.2622	94.3849
18.45	83.7134	83.8435	84.356	85.7011	87.8661	90.0431	91.8523	93.2907	94.4128
18.46	83.7467	83.8767	84.389	85.7334	87.8973	90.0732	91.8815	93.3191	94.4406
18.47	83.78	83.91	84.4219	85.7657	87.9285	90.1032	91.9106	93.3475	94.4684
18.48	83.8133	83.9432	84.4549	85.7979	87.9596	90.1333	91.9397	93.3758	94.4963
18.49	83.8465	83.9763	84.4878	85.8302	87.9908	90.1633	91.9688	93.4042	94.524
18.5	83.8797	84.0095	84.5207	85.8624	88.0219	90.1933	91.9979	93.4326	94.5518
18.51	83.9129	84.0427	84.5536	85.8946	88.053	90.2233	92.027	93.4609	94.5796
18.52	83.9461	84.0758	84.5865	85.9268	88.0841	90.2532	92.056	93.4892	94.6073
18.53	83.9793	84.1089	84.6194	85.959	88.1151	90.2832	92.0851	93.5175	94.6351
18.54	84.0125	84.142	84.6522	85.9912	88.1462	90.3132	92.1141	93.5458	94.6628
18.55	84.0456	84.1751	84.6851	86.0233	88.1772	90.3431	92.1431	93.5741	94.6905
18.56	84.0787	84.2082	84.7179	86.0554	88.2083	90.373	92.1721	93.6024	94.7182
18.57	84.1119	84.2412	84.7506	86.0875	88.2393	90.4029	92.2011	93.6306	94.7459
18.58	84.1449	84.2742	84.7834	86.1196	88.2703	90.4328	92.23	93.6589	94.7736
18.59	84.178	84.3072	84.8162	86.1517	88.3012	90.4627	92.259	93.6871	94.8012
18.6	84.2111	84.3402	84.8489	86.1838	88.3322	90.4925	92.2879	93.7153	94.8289
18.61	84.2441	84.3732	84.8817	86.2158	88.3631	90.5224	92.3169	93.7435	94.8565
18.62	84.2772	84.4062	84.9144	86.2479	88.3941	90.5522	92.3458	93.7717	94.8841
18.63	84.3102	84.4391	84.9471	86.2799	88.425	90.582	92.3747	93.7999	94.9117
18.64	84.3432	84.4721	84.9798	86.3119	88.4559	90.6118	92.4035	93.828	94.9393
18.65	84.3761	84.505	85.0124	86.3439	88.4868	90.6416	92.4324	93.8561	94.9669
18.66	84.4091	84.5379	85.0451	86.3758	88.5176	90.6713	92.4613	93.8843	94.9945
18.67	84.442	84.5708	85.0777	86.4078	88.5485	90.7011	92.4901	93.9124	95.022
18.68	84.475	84.6036	85.1103	86.4397	88.5793	90.7308	92.5189	93.9405	95.0495
18.69	84.5079	84.6365	85.1429	86.4716	88.6102	90.7605	92.5477	93.9686	95.0771
18.7	84.5408	84.6693	85.1755	86.5036	88.641	90.7902	92.5765	93.9966	95.1046
18.71	84.5736	84.7021	85.2081	86.5354	88.6718	90.8199	92.6053	94.0247	95.1321
18.72	84.6065	84.7349	85.2406	86.5673	88.7025	90.8496	92.6341	94.0527	95.1595
18.73	84.6393	84.7677	85.2731	86.5992	88.7333	90.8793	92.6628	94.0808	95.187
18.74	84.6722	84.8005	85.3056	86.631	88.764	90.9089	92.6915	94.1088	95.2145
18.75	84.705	84.8332	85.3381	86.6628	88.7948	90.9385	92.7202	94.1368	95.2419
18.76	84.7378	84.8659	85.3706	86.6946	88.8255	90.9681	92.749	94.1647	95.2693
18.77	84.7706	84.8987	85.4031	86.7264	88.8562	90.9977	92.7776	94.1927	95.2967
18.78	84.8033	84.9314	85.4355	86.7582	88.8868	91.0273	92.8063	94.2207	95.3241
18.79	84.8361	84.9641	85.468	86.79	88.9175	91.0569	92.835	94.2486	95.3515
18.8	84.8688	84.9967	85.5004	86.8217	88.9482	91.0865	92.8636	94.2766	95.3789
18.81	84.9015	85.0294	85.5328	86.8534	88.9788	91.116	92.8923	94.3045	95.4062
18.82	84.9342	85.062	85.5652	86.8851	89.0094	91.1455	92.9209	94.3324	95.4336
18.83	84.9669	85.0946	85.5975	86.9168	89.04	91.175	92.9495	94.3602	95.4609
18.84	84.9995	85.1272	85.6299	86.9485	89.0706	91.2045	92.9781	94.3881	95.4882
18.85	85.0322	85.1598	85.6622	86.9802	89.1012	91.234	93.0067	94.416	95.5155
18.86	85.0648	85.1924	85.6945	87.0118	89.1317	91.2635	93.0352	94.4438	95.5428
18.87	85.0974	85.2249	85.7268	87.0435	89.1623	91.2929	93.0638	94.4716	95.5701
18.88	85.13	85.2574	85.7591	87.0751	89.1928	91.3224	93.0923	94.4995	95.5973
18.89	85.1626	85.29	85.7914	87.1067	89.2233	91.3518	93.1208	94.5273	95.6246
18.9	85.1951	85.3225	85.8236	87.1382	89.2538	91.3812	93.1493	94.5551	95.6518
18.91	85.2277	85.355	85.8559	87.1698	89.2843	91.4106	93.1778	94.5828	95.679
18.92	85.2602	85.3874	85.8881	87.2014	89.3148	91.44	93.2063	94.6106	95.7062
18.93	85.2927	85.4199	85.9203	87.2329	89.3452	91.4693	93.2348	94.6383	95.7334
18.94	85.3252	85.4523	85.9525	87.2644	89.3757	91.4987	93.2632	94.6661	95.7606
18.95	85.3577	85.4847	85.9847	87.2959	89.4061	91.528	93.2916	94.6938	95.7878
18.96	85.3902	85.5171	86.0168	87.3274	89.4365	91.5573	93.32	94.7215	95.8149
18.97	85.4226	85.5495	86.0489	87.3589	89.4669	91.5866	93.3485	94.7492	95.842
18.98	85.455	85.5819	86.0811	87.3903	89.4973	91.6159	93.3769	94.7769	95.8692
18.99	85.4874	85.6142	86.1132	87.4218	89.5276	91.6452	93.4052	94.8045	95.8963
19	85.5198	85.6466	86.1453	87.4532	89.558	91.6745	93.4336	94.8322	95.9234
19.01	85.5522	85.6789	86.1773	87.4846	89.5883	91.7037	93.4619	94.8598	95.9504
19.02	85.5846	85.7112	86.2094	87.516	89.6186	91.7329	93.4903	94.8874	95.9775
19.03	85.6169	85.7435	86.2414	87.5474	89.6489	91.7622	93.5186	94.915	96.0046
19.04	85.6493	85.7758	86.2734	87.5787	89.6792	91.7914	93.5469	94.9426	96.0316
19.05	85.6816	85.808	86.3055	87.6101	89.7095	91.8205	93.5752	94.9702	96.0586
19.06	85.7139	85.8402	86.3375	87.6414	89.7397	91.8497	93.6034	94.9978	96.0856
19.07	85.7462	85.8725	86.3694	87.6727	89.7699	91.8789	93.6317	95.0253	96.1126
19.08	85.7784	85.9047	86.4014	87.704	89.8002	91.908	93.66	95.0529	96.1396
19.09	85.8107	85.9369	86.4333	87.7353	89.8304	91.9371	93.6882	95.0804	96.1666
19.1	85.8429	85.969	86.4652	87.7665	89.8606	91.9663	93.7164	95.1079	96.1936
19.11	85.8751	86.0012	86.4972	87.7978	89.8907	91.9954	93.7446	95.1354	96.2205
19.12	85.9073	86.0333	86.5291	87.829	89.9209	92.0244	93.7728	95.1629	96.2474
19.13	85.9395	86.0655	86.5609	87.8602	89.951	92.0535	93.801	95.1904	96.2744
19.14	85.9717	86.0976	86.5928	87.8915	89.9812	92.0826	93.8291	95.2178	96.3013
19.15	86.0038	86.1297	86.6246	87.9226	90.0113	92.1116	93.8573	95.2453	96.3281
19.16	86.036	86.1617	86.6565	87.9538	90.0414	92.1406	93.8854	95.2727	96.355
19.17	86.0681	86.1938	86.6883	87.985	90.0715	92.1696	93.9136	95.3001	96.3819
19.18	86.1002	86.2258	86.7201	88.0161	90.1015	92.1986	93.9417	95.3275	96.4087
19.19	86.1323	86.2579	86.7519	88.0472	90.1316	92.2276	93.9698	95.3549	96.4356
19.2	86.1643	86.2899	86.7836	88.0783	90.1616	92.2566	93.9978	95.3823	96.4624
19.21	86.1964	86.3219	86.8154	88.1094	90.1916	92.2855	94.0259	95.4096	96.4892
19.22	86.2284	86.3538	86.8471	88.1405	90.2217	92.3145	94.0539	95.437	96.516
19.23	86.2605	86.3858	86.8788	88.1716	90.2517	92.3434	94.082	95.4643	96.5428
19.24	86.2925	86.4178	86.9105	88.2026	90.2816	92.3723	94.11	95.4916	96.5696
19.25	86.3244	86.4497	86.9422	88.2336	90.3116	92.4012	94.138	95.5189	96.5963
19.26	86.3564	86.4816	86.9739	88.2646	90.3415	92.4301	94.166	95.5462	96.6231
19.27	86.3884	86.5135	87.0055	88.2956	90.3715	92.4589	94.194	95.5735	96.6498
19.28	86.4203	86.5454	87.0372	88.3266	90.4014	92.4878	94.2219	95.6008	96.6765
19.29	86.4523	86.5773	87.0688	88.3576	90.4313	92.5166	94.2499	95.628	96.7032
19.3	86.4842	86.6091	87.1004	88.3885	90.4612	92.5454	94.2778	95.6552	96.7299
19.31	86.5161	86.6409	87.132	88.4195	90.4911	92.5742	94.3058	95.6825	96.7566
19.32	86.5479	86.6727	87.1636	88.4504	90.5209	92.603	94.3337	95.7097	96.7832
19.33	86.5798	86.7045	87.1951	88.4813	90.5508	92.6318	94.3615	95.7369	96.8099
19.34	86.6116	86.7363	87.2267	88.5122	90.5806	92.6606	94.3894	95.764	96.8365
19.35	86.6435	86.7681	87.2582	88.543	90.6104	92.6893	94.4173	95.7912	96.8632
19.36	86.6753	86.7999	87.2897	88.5739	90.6402	92.7181	94.4451	95.8184	96.8898
19.37	86.7071	86.8316	87.3212	88.6047	90.67	92.7468	94.473	95.8455	96.9164
19.38	86.7388	86.8633	87.3527	88.6356	90.6997	92.7755	94.5008	95.8726	96.9429
19.39	86.7706	86.895	87.3841	88.6664	90.7295	92.8042	94.5286	95.8997	96.9695
19.4	86.8024	86.9267	87.4156	88.6972	90.7592	92.8328	94.5564	95.9268	96.9961
19.41	86.8341	86.9584	87.447	88.728	90.789	92.8615	94.5842	95.9539	97.0226
19.42	86.8658	86.99	87.4784	88.7587	90.8187	92.8902	94.612	95.981	97.0491
19.43	86.8975	87.0217	87.5098	88.7895	90.8484	92.9188	94.6397	96.0081	97.0757
19.44	86.9292	87.0533	87.5412	88.8202	90.878	92.9474	94.6675	96.0351	97.1022
19.45	86.9609	87.0849	87.5726	88.8509	90.9077	92.976	94.6952	96.0621	97.1286
19.46	86.9925	87.1165	87.6039	88.8816	90.9373	93.0046	94.7229	96.0892	97.1551
19.47	87.0242	87.1481	87.6353	88.9123	90.967	93.0332	94.7506	96.1162	97.1816
19.48	87.0558	87.1796	87.6666	88.943	90.9966	93.0617	94.7783	96.1431	97.208
19.49	87.0874	87.2112	87.6979	88.9736	91.0262	93.0903	94.806	96.1701	97.2345
19.5	87.119	87.2427	87.7292	89.0043	91.0558	93.1188	94.8336	96.1971	97.2609
19.51	87.1505	87.2742	87.7604	89.0349	91.0854	93.1473	94.8613	96.224	97.2873
19.52	87.1821	87.3057	87.7917	89.0655	91.1149	93.1758	94.8889	96.251	97.3137
19.53	87.2136	87.3372	87.8229	89.0961	91.1445	93.2043	94.9165	96.2779	97.3401
19.54	87.2451	87.3687	87.8542	89.1267	91.174	93.2328	94.9441	96.3048	97.3665
19.55	87.2767	87.4001	87.8854	89.1572	91.2035	93.2613	94.9717	96.3317	97.3928
19.56	87.3081	87.4316	87.9166	89.1878	91.233	93.2897	94.9993	96.3586	97.4192
19.57	87.3396	87.463	87.9477	89.2183	91.2625	93.3182	95.0268	96.3855	97.4455
19.58	87.3711	87.4944	87.9789	89.2488	91.292	93.3466	95.0544	96.4123	97.4718
19.59	87.4025	87.5258	88.01	89.2793	91.3214	93.375	95.0819	96.4391	97.4981
19.6	87.434	87.5571	88.0412	89.3098	91.3508	93.4034	95.1094	96.466	97.5244
19.61	87.4654	87.5885	88.0723	89.3403	91.3803	93.4317	95.1369	96.4928	97.5507
19.62	87.4968	87.6198	88.1034	89.3707	91.4097	93.4601	95.1644	96.5196	97.5769
19.63	87.5281	87.6511	88.1345	89.4012	91.4391	93.4884	95.1919	96.5464	97.6032
19.64	87.5595	87.6825	88.1655	89.4316	91.4685	93.5168	95.2194	96.5732	97.6294
19.65	87.5909	87.7137	88.1966	89.462	91.4978	93.5451	95.2468	96.5999	97.6557
19.66	87.6222	87.745	88.2276	89.4924	91.5272	93.5734	95.2743	96.6267	97.6819
19.67	87.6535	87.7763	88.2586	89.5228	91.5565	93.6017	95.3017	96.6534	97.7081
19.68	87.6848	87.8075	88.2896	89.5531	91.5858	93.63	95.3291	96.6801	97.7343
19.69	87.7161	87.8387	88.3206	89.5835	91.6151	93.6582	95.3565	96.7068	97.7604
19.7	87.7474	87.87	88.3516	89.6138	91.6444	93.6865	95.3839	96.7335	97.7866
19.71	87.7786	87.9012	88.3826	89.6441	91.6737	93.7147	95.4112	96.7602	97.8127
19.72	87.8099	87.9323	88.4135	89.6744	91.703	93.7429	95.4386	96.7869	97.8389
19.73	87.8411	87.9635	88.4444	89.7047	91.7322	93.7711	95.4659	96.8135	97.865
19.74	87.8723	87.9946	88.4753	89.735	91.7614	93.7993	95.4933	96.8402	97.8911
19.75	87.9035	88.0258	88.5062	89.7652	91.7907	93.8275	95.5206	96.8668	97.9172
19.76	87.9347	88.0569	88.5371	89.7955	91.8199	93.8556	95.5479	96.8934	97.9433
19.77	87.9658	88.088	88.568	89.8257	91.8491	93.8838	95.5751	96.92	97.9693
19.78	87.997	88.1191	88.5988	89.8559	91.8782	93.9119	95.6024	96.9466	97.9954
19.79	88.0281	88.1501	88.6296	89.8861	91.9074	93.94	95.6297	96.9732	98.0214
19.8	88.0592	88.1812	88.6605	89.9163	91.9365	93.9681	95.6569	96.9997	98.0475
19.81	88.0903	88.2122	88.6913	89.9464	91.9656	93.9962	95.6841	97.0263	98.0735
19.82	88.1214	88.2433	88.722	89.9766	91.9948	94.0243	95.7114	97.0528	98.0995
19.83	88.1524	88.2743	88.7528	90.0067	92.0239	94.0524	95.7386	97.0793	98.1255
19.84	88.1835	88.3053	88.7836	90.0368	92.0529	94.0804	95.7657	97.1058	98.1514
19.85	88.2145	88.3362	88.8143	90.0669	92.082	94.1085	95.7929	97.1323	98.1774
19.86	88.2455	88.3672	88.845	90.097	92.1111	94.1365	95.8201	97.1588	98.2034
19.87	88.2766	88.3981	88.8757	90.1271	92.1401	94.1645	95.8472	97.1853	98.2293
19.88	88.3075	88.4291	88.9064	90.1571	92.1691	94.1925	95.8744	97.2117	98.2552
19.89	88.3385	88.46	88.9371	90.1872	92.1982	94.2205	95.9015	97.2382	98.2811
19.9	88.3695	88.4909	88.9678	90.2172	92.2271	94.2484	95.9286	97.2646	98.307
19.91	88.4004	88.5218	88.9984	90.2472	92.2561	94.2764	95.9557	97.291	98.3329
19.92	88.4313	88.5526	89.029	90.2772	92.2851	94.3043	95.9828	97.3174	98.3588
19.93	88.4622	88.5835	89.0597	90.3072	92.3141	94.3322	96.0098	97.3438	98.3847
19.94	88.4931	88.6143	89.0903	90.3371	92.343	94.3601	96.0369	97.3702	98.4105
19.95	88.524	88.6451	89.1208	90.3671	92.3719	94.388	96.0639	97.3965	98.4363
19.96	88.5549	88.6759	89.1514	90.397	92.4008	94.4159	96.091	97.4229	98.4622
19.97	88.5857	88.7067	89.182	90.427	92.4297	94.4438	96.118	97.4492	98.488
[truncated: 8,003 more rows]

## Sheet: Fig.2 A3
Time	X1%	X1%	X1%	X1%	X1%	X1%	X1%	X1%	X1%
h
Time	μm2=0.2	μm2=0.4	μm2=0.6	μm2=0.8	μm2=1.0	μm2=1.2	μm2=1.4	μm2=1.6	μm2=1.8
0.01	0.50158	0.50113	0.50068	0.50023	0.49977	0.49932	0.49887	0.49843	0.49798
0.02	0.50317	0.50226	0.50136	0.50045	0.49955	0.49865	0.49775	0.49685	0.49596
0.03	0.50475	0.50339	0.50203	0.50068	0.49932	0.49797	0.49662	0.49528	0.49394
0.04	0.50633	0.50452	0.50271	0.5009	0.4991	0.4973	0.4955	0.49371	0.49191
0.05	0.50792	0.50565	0.50339	0.50113	0.49887	0.49662	0.49437	0.49213	0.48989
0.06	0.5095	0.50678	0.50406	0.50135	0.49865	0.49595	0.49325	0.49056	0.48787
0.07	0.51108	0.50791	0.50474	0.50158	0.49842	0.49527	0.49213	0.48899	0.48585
0.08	0.51267	0.50904	0.50542	0.5018	0.4982	0.4946	0.491	0.48741	0.48383
0.09	0.51425	0.51017	0.5061	0.50203	0.49797	0.49392	0.48988	0.48584	0.48182
0.1	0.51583	0.5113	0.50677	0.50226	0.49775	0.49324	0.48875	0.48427	0.4798
0.11	0.51741	0.51243	0.50745	0.50248	0.49752	0.49257	0.48763	0.4827	0.47778
0.12	0.51899	0.51356	0.50813	0.50271	0.4973	0.49189	0.4865	0.48113	0.47577
0.13	0.52058	0.51469	0.50881	0.50293	0.49707	0.49122	0.48538	0.47956	0.47375
0.14	0.52216	0.51582	0.50948	0.50316	0.49684	0.49054	0.48426	0.47799	0.47174
0.15	0.52374	0.51694	0.51016	0.50338	0.49662	0.48987	0.48313	0.47642	0.46972
0.16	0.52532	0.51807	0.51084	0.50361	0.49639	0.48919	0.48201	0.47485	0.46771
0.17	0.52689	0.5192	0.51151	0.50383	0.49617	0.48852	0.48089	0.47328	0.4657
0.18	0.52847	0.52033	0.51219	0.50406	0.49594	0.48784	0.47976	0.47171	0.46369
0.19	0.53005	0.52146	0.51287	0.50429	0.49572	0.48717	0.47864	0.47014	0.46168
0.2	0.53163	0.52258	0.51354	0.50451	0.49549	0.48649	0.47752	0.46858	0.45967
0.21	0.5332	0.52371	0.51422	0.50474	0.49527	0.48582	0.4764	0.46701	0.45767
0.22	0.53478	0.52484	0.5149	0.50496	0.49504	0.48514	0.47528	0.46545	0.45566
0.23	0.53636	0.52597	0.51557	0.50519	0.49482	0.48447	0.47416	0.46388	0.45366
0.24	0.53793	0.52709	0.51625	0.50541	0.49459	0.4838	0.47303	0.46232	0.45166
0.25	0.5395	0.52822	0.51693	0.50564	0.49437	0.48312	0.47191	0.46076	0.44966
0.26	0.54108	0.52934	0.5176	0.50586	0.49414	0.48245	0.47079	0.45919	0.44766
0.27	0.54265	0.53047	0.51828	0.50609	0.49392	0.48177	0.46967	0.45763	0.44567
0.28	0.54422	0.5316	0.51896	0.50632	0.49369	0.4811	0.46855	0.45607	0.44367
0.29	0.54579	0.53272	0.51963	0.50654	0.49347	0.48042	0.46744	0.45451	0.44168
0.3	0.54736	0.53384	0.52031	0.50677	0.49324	0.47975	0.46632	0.45296	0.43969
0.31	0.54893	0.53497	0.52098	0.50699	0.49302	0.47908	0.4652	0.4514	0.4377
0.32	0.55049	0.53609	0.52166	0.50722	0.49279	0.4784	0.46408	0.44984	0.43572
0.33	0.55206	0.53722	0.52233	0.50744	0.49257	0.47773	0.46296	0.44829	0.43373
0.34	0.55362	0.53834	0.52301	0.50767	0.49234	0.47706	0.46185	0.44673	0.43175
0.35	0.55519	0.53946	0.52369	0.50789	0.49211	0.47638	0.46073	0.44518	0.42977
0.36	0.55675	0.54058	0.52436	0.50812	0.49189	0.47571	0.45961	0.44363	0.42779
0.37	0.55831	0.5417	0.52504	0.50834	0.49166	0.47504	0.4585	0.44208	0.42582
0.38	0.55987	0.54283	0.52571	0.50857	0.49144	0.47436	0.45738	0.44053	0.42385
0.39	0.56143	0.54395	0.52639	0.50879	0.49121	0.47369	0.45627	0.43898	0.42188
0.4	0.56299	0.54507	0.52706	0.50902	0.49099	0.47302	0.45515	0.43744	0.41991
0.41	0.56455	0.54619	0.52774	0.50924	0.49076	0.47235	0.45404	0.43589	0.41795
0.42	0.5661	0.54731	0.52841	0.50947	0.49054	0.47167	0.45293	0.43435	0.41599
0.43	0.56766	0.54842	0.52908	0.5097	0.49031	0.471	0.45181	0.4328	0.41403
0.44	0.56921	0.54954	0.52976	0.50992	0.49009	0.47033	0.4507	0.43126	0.41207
0.45	0.57076	0.55066	0.53043	0.51015	0.48986	0.46966	0.44959	0.42972	0.41012
0.46	0.57231	0.55178	0.53111	0.51037	0.48964	0.46899	0.44848	0.42819	0.40817
0.47	0.57386	0.55289	0.53178	0.5106	0.48941	0.46831	0.44737	0.42665	0.40623
0.48	0.57541	0.55401	0.53246	0.51082	0.48919	0.46764	0.44626	0.42511	0.40428
0.49	0.57695	0.55513	0.53313	0.51105	0.48896	0.46697	0.44515	0.42358	0.40234
0.5	0.5785	0.55624	0.5338	0.51127	0.48874	0.4663	0.44404	0.42205	0.40041
0.51	0.58004	0.55735	0.53448	0.5115	0.48852	0.46563	0.44293	0.42052	0.39847
0.52	0.58158	0.55847	0.53515	0.51172	0.48829	0.46496	0.44182	0.41899	0.39654
0.53	0.58312	0.55958	0.53582	0.51195	0.48807	0.46429	0.44072	0.41746	0.39461
0.54	0.58465	0.56069	0.53649	0.51217	0.48784	0.46362	0.43961	0.41594	0.39269
0.55	0.58619	0.56181	0.53717	0.5124	0.48762	0.46295	0.43851	0.41441	0.39077
0.56	0.58772	0.56292	0.53784	0.51262	0.48739	0.46228	0.4374	0.41289	0.38885
0.57	0.58926	0.56403	0.53851	0.51285	0.48717	0.46161	0.4363	0.41137	0.38694
0.58	0.59079	0.56514	0.53919	0.51307	0.48694	0.46094	0.43519	0.40985	0.38503
0.59	0.59232	0.56625	0.53986	0.5133	0.48672	0.46027	0.43409	0.40834	0.38313
0.6	0.59384	0.56735	0.54053	0.51352	0.48649	0.4596	0.43299	0.40682	0.38123
0.61	0.59537	0.56846	0.5412	0.51375	0.48627	0.45893	0.43189	0.40531	0.37933
0.62	0.59689	0.56957	0.54187	0.51397	0.48604	0.45826	0.43079	0.4038	0.37743
0.63	0.59841	0.57068	0.54254	0.5142	0.48582	0.45759	0.42969	0.40229	0.37554
0.64	0.59993	0.57178	0.54322	0.51442	0.48559	0.45692	0.42859	0.40078	0.37366
0.65	0.60145	0.57289	0.54389	0.51465	0.48537	0.45625	0.42749	0.39928	0.37178
0.66	0.60296	0.57399	0.54456	0.51487	0.48514	0.45558	0.4264	0.39777	0.3699
0.67	0.60448	0.57509	0.54523	0.5151	0.48492	0.45492	0.4253	0.39627	0.36802
0.68	0.60599	0.57619	0.5459	0.51532	0.48469	0.45425	0.4242	0.39478	0.36616
0.69	0.6075	0.5773	0.54657	0.51555	0.48447	0.45358	0.42311	0.39328	0.36429
0.7	0.60901	0.5784	0.54724	0.51577	0.48425	0.45291	0.42201	0.39178	0.36243
0.71	0.61051	0.5795	0.54791	0.516	0.48402	0.45224	0.42092	0.39029	0.36057
0.72	0.61201	0.5806	0.54858	0.51622	0.4838	0.45158	0.41983	0.3888	0.35872
0.73	0.61351	0.58169	0.54925	0.51645	0.48357	0.45091	0.41874	0.38731	0.35687
0.74	0.61501	0.58279	0.54992	0.51667	0.48335	0.45024	0.41765	0.38583	0.35503
0.75	0.61651	0.58389	0.55059	0.5169	0.48312	0.44958	0.41656	0.38435	0.35319
0.76	0.618	0.58498	0.55126	0.51712	0.4829	0.44891	0.41547	0.38287	0.35136
0.77	0.61949	0.58608	0.55192	0.51734	0.48267	0.44825	0.41438	0.38139	0.34953
0.78	0.62098	0.58717	0.55259	0.51757	0.48245	0.44758	0.4133	0.37991	0.3477
0.79	0.62247	0.58827	0.55326	0.51779	0.48223	0.44691	0.41221	0.37844	0.34588
0.8	0.62396	0.58936	0.55393	0.51802	0.482	0.44625	0.41113	0.37697	0.34407
0.81	0.62544	0.59045	0.5546	0.51824	0.48178	0.44558	0.41004	0.3755	0.34226
0.82	0.62692	0.59154	0.55526	0.51847	0.48155	0.44492	0.40896	0.37403	0.34045
0.83	0.6284	0.59263	0.55593	0.51869	0.48133	0.44425	0.40788	0.37257	0.33865
0.84	0.62987	0.59372	0.5566	0.51892	0.4811	0.44359	0.4068	0.3711	0.33685
0.85	0.63134	0.5948	0.55726	0.51914	0.48088	0.44293	0.40572	0.36965	0.33506
0.86	0.63281	0.59589	0.55793	0.51937	0.48066	0.44226	0.40464	0.36819	0.33328
0.87	0.63428	0.59698	0.5586	0.51959	0.48043	0.4416	0.40356	0.36674	0.3315
0.88	0.63575	0.59806	0.55926	0.51982	0.48021	0.44094	0.40248	0.36528	0.32972
0.89	0.63721	0.59914	0.55993	0.52004	0.47998	0.44027	0.40141	0.36384	0.32795
0.9	0.63867	0.60023	0.5606	0.52026	0.47976	0.43961	0.40033	0.36239	0.32618
0.91	0.64013	0.60131	0.56126	0.52049	0.47953	0.43895	0.39926	0.36095	0.32442
0.92	0.64158	0.60239	0.56193	0.52071	0.47931	0.43829	0.39819	0.35951	0.32267
0.93	0.64303	0.60347	0.56259	0.52094	0.47909	0.43762	0.39711	0.35807	0.32092
0.94	0.64448	0.60455	0.56326	0.52116	0.47886	0.43696	0.39604	0.35663	0.31918
0.95	0.64593	0.60562	0.56392	0.52139	0.47864	0.4363	0.39498	0.3552	0.31744
0.96	0.64737	0.6067	0.56458	0.52161	0.47841	0.43564	0.39391	0.35377	0.3157
0.97	0.64881	0.60778	0.56525	0.52184	0.47819	0.43498	0.39284	0.35235	0.31397
0.98	0.65025	0.60885	0.56591	0.52206	0.47797	0.43432	0.39177	0.35092	0.31225
0.99	0.65169	0.60992	0.56657	0.52228	0.47774	0.43366	0.39071	0.3495	0.31054
1	0.65312	0.61099	0.56724	0.52251	0.47752	0.433	0.38965	0.34808	0.30882
1.01	0.65455	0.61207	0.5679	0.52273	0.47729	0.43234	0.38858	0.34667	0.30712
1.02	0.65598	0.61313	0.56856	0.52296	0.47707	0.43168	0.38752	0.34526	0.30542
1.03	0.6574	0.6142	0.56923	0.52318	0.47685	0.43102	0.38646	0.34385	0.30372
1.04	0.65883	0.61527	0.56989	0.5234	0.47662	0.43036	0.3854	0.34244	0.30203
1.05	0.66024	0.61634	0.57055	0.52363	0.4764	0.42971	0.38435	0.34104	0.30035
1.06	0.66166	0.6174	0.57121	0.52385	0.47618	0.42905	0.38329	0.33964	0.29867
1.07	0.66307	0.61847	0.57187	0.52408	0.47595	0.42839	0.38224	0.33824	0.297
1.08	0.66448	0.61953	0.57253	0.5243	0.47573	0.42773	0.38118	0.33685	0.29534
1.09	0.66589	0.62059	0.57319	0.52453	0.47551	0.42708	0.38013	0.33545	0.29368
1.1	0.66729	0.62165	0.57385	0.52475	0.47528	0.42642	0.37908	0.33407	0.29202
1.11	0.66869	0.62271	0.57451	0.52497	0.47506	0.42576	0.37803	0.33268	0.29037
1.12	0.67009	0.62377	0.57517	0.5252	0.47483	0.42511	0.37698	0.3313	0.28873
1.13	0.67149	0.62482	0.57583	0.52542	0.47461	0.42445	0.37593	0.32992	0.28709
1.14	0.67288	0.62588	0.57649	0.52564	0.47439	0.4238	0.37489	0.32855	0.28546
1.15	0.67427	0.62693	0.57715	0.52587	0.47416	0.42314	0.37384	0.32717	0.28384
1.16	0.67565	0.62799	0.57781	0.52609	0.47394	0.42249	0.3728	0.32581	0.28222
1.17	0.67703	0.62904	0.57847	0.52632	0.47372	0.42183	0.37176	0.32444	0.28061
1.18	0.67841	0.63009	0.57912	0.52654	0.47349	0.42118	0.37072	0.32308	0.279
1.19	0.67979	0.63114	0.57978	0.52676	0.47327	0.42052	0.36968	0.32172	0.2774
1.2	0.68116	0.63218	0.58044	0.52699	0.47305	0.41987	0.36864	0.32036	0.27581
1.21	0.68253	0.63323	0.58109	0.52721	0.47282	0.41922	0.3676	0.31901	0.27422
1.22	0.6839	0.63428	0.58175	0.52744	0.4726	0.41857	0.36657	0.31766	0.27264
1.23	0.68526	0.63532	0.58241	0.52766	0.47238	0.41791	0.36553	0.31632	0.27106
1.24	0.68662	0.63636	0.58306	0.52788	0.47215	0.41726	0.3645	0.31497	0.26949
1.25	0.68798	0.6374	0.58372	0.52811	0.47193	0.41661	0.36347	0.31363	0.26793
1.26	0.68933	0.63844	0.58437	0.52833	0.47171	0.41596	0.36244	0.3123	0.26637
1.27	0.69068	0.63948	0.58503	0.52855	0.47148	0.41531	0.36141	0.31097	0.26482
1.28	0.69203	0.64052	0.58568	0.52878	0.47126	0.41466	0.36039	0.30964	0.26328
1.29	0.69337	0.64155	0.58634	0.529	0.47104	0.41401	0.35936	0.30831	0.26174
1.3	0.69471	0.64259	0.58699	0.52922	0.47082	0.41336	0.35834	0.30699	0.26021
1.31	0.69605	0.64362	0.58764	0.52945	0.47059	0.41271	0.35732	0.30567	0.25868
1.32	0.69738	0.64465	0.5883	0.52967	0.47037	0.41206	0.3563	0.30436	0.25717
1.33	0.69871	0.64568	0.58895	0.52989	0.47015	0.41141	0.35528	0.30305	0.25565
1.34	0.70004	0.64671	0.5896	0.53012	0.46992	0.41076	0.35426	0.30174	0.25415
1.35	0.70136	0.64774	0.59025	0.53034	0.4697	0.41012	0.35324	0.30043	0.25265
1.36	0.70268	0.64877	0.59091	0.53056	0.46948	0.40947	0.35223	0.29913	0.25116
1.37	0.704	0.64979	0.59156	0.53079	0.46926	0.40882	0.35121	0.29784	0.24967
1.38	0.70531	0.65081	0.59221	0.53101	0.46903	0.40818	0.3502	0.29654	0.24819
1.39	0.70662	0.65183	0.59286	0.53123	0.46881	0.40753	0.34919	0.29525	0.24672
1.4	0.70792	0.65285	0.59351	0.53146	0.46859	0.40689	0.34818	0.29397	0.24525
1.41	0.70923	0.65387	0.59416	0.53168	0.46837	0.40624	0.34718	0.29269	0.24379
1.42	0.71053	0.65489	0.59481	0.5319	0.46814	0.4056	0.34617	0.29141	0.24233
1.43	0.71182	0.65591	0.59546	0.53213	0.46792	0.40495	0.34517	0.29013	0.24089
1.44	0.71311	0.65692	0.5961	0.53235	0.4677	0.40431	0.34417	0.28886	0.23945
1.45	0.7144	0.65793	0.59675	0.53257	0.46748	0.40366	0.34317	0.28759	0.23801
1.46	0.71569	0.65894	0.5974	0.5328	0.46725	0.40302	0.34217	0.28633	0.23659
1.47	0.71697	0.65995	0.59805	0.53302	0.46703	0.40238	0.34117	0.28507	0.23516
1.48	0.71825	0.66096	0.5987	0.53324	0.46681	0.40174	0.34017	0.28381	0.23375
1.49	0.71952	0.66197	0.59934	0.53346	0.46659	0.4011	0.33918	0.28256	0.23234
1.5	0.72079	0.66297	0.59999	0.53369	0.46636	0.40045	0.33819	0.28131	0.23094
1.51	0.72206	0.66398	0.60063	0.53391	0.46614	0.39981	0.3372	0.28007	0.22955
1.52	0.72332	0.66498	0.60128	0.53413	0.46592	0.39917	0.33621	0.27883	0.22816
1.53	0.72458	0.66598	0.60193	0.53435	0.4657	0.39853	0.33522	0.27759	0.22678
1.54	0.72584	0.66698	0.60257	0.53458	0.46548	0.39789	0.33424	0.27636	0.22541
1.55	0.72709	0.66798	0.60321	0.5348	0.46525	0.39726	0.33325	0.27513	0.22404
1.56	0.72834	0.66897	0.60386	0.53502	0.46503	0.39662	0.33227	0.2739	0.22268
1.57	0.72958	0.66997	0.6045	0.53525	0.46481	0.39598	0.33129	0.27268	0.22133
1.58	0.73082	0.67096	0.60514	0.53547	0.46459	0.39534	0.33031	0.27146	0.21998
1.59	0.73206	0.67195	0.60579	0.53569	0.46437	0.39471	0.32933	0.27025	0.21864
1.6	0.7333	0.67294	0.60643	0.53591	0.46414	0.39407	0.32836	0.26904	0.21731
1.61	0.73453	0.67393	0.60707	0.53614	0.46392	0.39343	0.32739	0.26783	0.21598
1.62	0.73575	0.67492	0.60771	0.53636	0.4637	0.3928	0.32641	0.26663	0.21466
1.63	0.73698	0.6759	0.60835	0.53658	0.46348	0.39216	0.32544	0.26543	0.21335
1.64	0.7382	0.67688	0.60899	0.5368	0.46326	0.39153	0.32448	0.26424	0.21204
1.65	0.73941	0.67787	0.60963	0.53702	0.46304	0.39089	0.32351	0.26305	0.21075
1.66	0.74062	0.67885	0.61027	0.53725	0.46281	0.39026	0.32254	0.26186	0.20945
1.67	0.74183	0.67982	0.61091	0.53747	0.46259	0.38963	0.32158	0.26068	0.20817
1.68	0.74303	0.6808	0.61155	0.53769	0.46237	0.38899	0.32062	0.25951	0.20689
1.69	0.74424	0.68177	0.61219	0.53791	0.46215	0.38836	0.31966	0.25833	0.20562
1.7	0.74543	0.68275	0.61283	0.53814	0.46193	0.38773	0.31871	0.25716	0.20435
1.71	0.74663	0.68372	0.61347	0.53836	0.46171	0.3871	0.31775	0.256	0.2031
1.72	0.74781	0.68469	0.6141	0.53858	0.46149	0.38647	0.3168	0.25484	0.20185
1.73	0.749	0.68566	0.61474	0.5388	0.46127	0.38584	0.31584	0.25368	0.2006
1.74	0.75018	0.68662	0.61538	0.53902	0.46104	0.38521	0.31489	0.25253	0.19937
1.75	0.75136	0.68759	0.61601	0.53925	0.46082	0.38458	0.31395	0.25138	0.19814
1.76	0.75253	0.68855	0.61665	0.53947	0.4606	0.38395	0.313	0.25023	0.19692
1.77	0.7537	0.68951	0.61728	0.53969	0.46038	0.38333	0.31206	0.24909	0.1957
1.78	0.75487	0.69047	0.61792	0.53991	0.46016	0.3827	0.31112	0.24795	0.19449
1.79	0.75603	0.69143	0.61855	0.54013	0.45994	0.38207	0.31017	0.24682	0.19329
1.8	0.75719	0.69239	0.61918	0.54035	0.45972	0.38145	0.30924	0.24569	0.1921
1.81	0.75835	0.69334	0.61982	0.54058	0.4595	0.38082	0.3083	0.24457	0.19091
1.82	0.7595	0.69429	0.62045	0.5408	0.45928	0.3802	0.30737	0.24345	0.18973
1.83	0.76064	0.69525	0.62108	0.54102	0.45906	0.37957	0.30643	0.24234	0.18856
1.84	0.76179	0.6962	0.62171	0.54124	0.45884	0.37895	0.3055	0.24123	0.18739
1.85	0.76293	0.69714	0.62234	0.54146	0.45862	0.37832	0.30457	0.24012	0.18623
1.86	0.76406	0.69809	0.62297	0.54168	0.45839	0.3777	0.30365	0.23902	0.18508
1.87	0.7652	0.69903	0.6236	0.5419	0.45817	0.37708	0.30272	0.23792	0.18394
1.88	0.76632	0.69998	0.62423	0.54213	0.45795	0.37646	0.3018	0.23683	0.1828
1.89	0.76745	0.70092	0.62486	0.54235	0.45773	0.37584	0.30088	0.23574	0.18167
1.9	0.76857	0.70185	0.62549	0.54257	0.45751	0.37522	0.29996	0.23465	0.18055
1.91	0.76968	0.70279	0.62612	0.54279	0.45729	0.3746	0.29905	0.23357	0.17943
1.92	0.7708	0.70373	0.62675	0.54301	0.45707	0.37398	0.29813	0.23249	0.17832
1.93	0.77191	0.70466	0.62737	0.54323	0.45685	0.37336	0.29722	0.23142	0.17722
1.94	0.77301	0.70559	0.628	0.54345	0.45663	0.37274	0.29631	0.23036	0.17613
1.95	0.77411	0.70652	0.62863	0.54367	0.45641	0.37212	0.2954	0.22929	0.17504
1.96	0.77521	0.70745	0.62925	0.54389	0.45619	0.37151	0.2945	0.22823	0.17397
1.97	0.7763	0.70838	0.62988	0.54412	0.45597	0.37089	0.29359	0.22718	0.17289
1.98	0.77739	0.7093	0.6305	0.54434	0.45575	0.37027	0.29269	0.22613	0.17183
1.99	0.77848	0.71022	0.63112	0.54456	0.45553	0.36966	0.29179	0.22509	0.17078
2	0.77956	0.71114	0.63175	0.54478	0.45531	0.36904	0.29089	0.22405	0.16973
2.01	0.78064	0.71206	0.63237	0.545	0.4551	0.36843	0.29	0.22301	0.16869
2.02	0.78171	0.71298	0.63299	0.54522	0.45488	0.36782	0.2891	0.22198	0.16765
2.03	0.78278	0.71389	0.63362	0.54544	0.45466	0.36721	0.28821	0.22095	0.16663
2.04	0.78385	0.71481	0.63424	0.54566	0.45444	0.36659	0.28732	0.21993	0.16561
2.05	0.78491	0.71572	0.63486	0.54588	0.45422	0.36598	0.28644	0.21891	0.1646
2.06	0.78597	0.71663	0.63548	0.5461	0.454	0.36537	0.28555	0.2179	0.1636
2.07	0.78702	0.71754	0.6361	0.54632	0.45378	0.36476	0.28467	0.21689	0.1626
2.08	0.78807	0.71844	0.63672	0.54654	0.45356	0.36415	0.28379	0.21589	0.16162
2.09	0.78912	0.71935	0.63734	0.54676	0.45334	0.36354	0.28291	0.21489	0.16064
2.1	0.79016	0.72025	0.63796	0.54698	0.45312	0.36294	0.28204	0.2139	0.15967
2.11	0.7912	0.72115	0.63857	0.5472	0.4529	0.36233	0.28116	0.21291	0.15871
2.12	0.79223	0.72205	0.63919	0.54742	0.45268	0.36172	0.28029	0.21192	0.15775
2.13	0.79327	0.72295	0.63981	0.54764	0.45247	0.36112	0.27943	0.21094	0.15681
2.14	0.79429	0.72384	0.64042	0.54786	0.45225	0.36051	0.27856	0.20997	0.15587
2.15	0.79532	0.72473	0.64104	0.54808	0.45203	0.35991	0.27769	0.209	0.15494
2.16	0.79634	0.72562	0.64165	0.5483	0.45181	0.3593	0.27683	0.20803	0.15402
2.17	0.79735	0.72651	0.64227	0.54852	0.45159	0.3587	0.27597	0.20707	0.15311
2.18	0.79836	0.7274	0.64288	0.54874	0.45137	0.3581	0.27512	0.20612	0.15221
2.19	0.79937	0.72829	0.6435	0.54896	0.45116	0.3575	0.27426	0.20517	0.15132
2.2	0.80037	0.72917	0.64411	0.54918	0.45094	0.3569	0.27341	0.20422	0.15044
2.21	0.80137	0.73005	0.64472	0.5494	0.45072	0.3563	0.27256	0.20328	0.14956
2.22	0.80237	0.73093	0.64533	0.54962	0.4505	0.3557	0.27171	0.20235	0.1487
2.23	0.80336	0.73181	0.64595	0.54984	0.45028	0.3551	0.27087	0.20142	0.14784
2.24	0.80435	0.73268	0.64656	0.55006	0.45006	0.3545	0.27002	0.20049	0.147
2.25	0.80534	0.73356	0.64717	0.55028	0.44985	0.3539	0.26918	0.19957	0.14616
2.26	0.80632	0.73443	0.64778	0.5505	0.44963	0.35331	0.26835	0.19866	0.14534
2.27	0.80729	0.7353	0.64838	0.55072	0.44941	0.35271	0.26751	0.19775	0.14452
2.28	0.80827	0.73617	0.64899	0.55093	0.44919	0.35212	0.26668	0.19685	0.14372
2.29	0.80924	0.73703	0.6496	0.55115	0.44898	0.35152	0.26585	0.19595	0.14292
2.3	0.8102	0.7379	0.65021	0.55137	0.44876	0.35093	0.26502	0.19506	0.14214
2.31	0.81116	0.73876	0.65081	0.55159	0.44854	0.35034	0.26419	0.19417	0.14137
2.32	0.81212	0.73962	0.65142	0.55181	0.44833	0.34975	0.26337	0.19329	0.14061
2.33	0.81307	0.74048	0.65203	0.55203	0.44811	0.34915	0.26255	0.19241	0.13987
2.34	0.81402	0.74134	0.65263	0.55225	0.44789	0.34856	0.26173	0.19154	0.13914
2.35	0.81497	0.74219	0.65324	0.55247	0.44767	0.34797	0.26092	0.19068	0.13842
2.36	0.81591	0.74304	0.65384	0.55269	0.44746	0.34739	0.26011	0.18982	0.13771
2.37	0.81685	0.74389	0.65444	0.5529	0.44724	0.3468	0.2593	0.18897	0.13702
2.38	0.81778	0.74474	0.65504	0.55312	0.44702	0.34621	0.25849	0.18812	0.13634
2.39	0.81872	0.74559	0.65565	0.55334	0.44681	0.34563	0.25769	0.18728	0.13567
2.4	0.81964	0.74643	0.65625	0.55356	0.44659	0.34504	0.25689	0.18644	0.13503
2.41	0.82057	0.74728	0.65685	0.55378	0.44637	0.34446	0.25609	0.18562	0.1344
2.42	0.82148	0.74812	0.65745	0.554	0.44616	0.34387	0.25529	0.18479	0.13378
2.43	0.8224	0.74895	0.65805	0.55421	0.44594	0.34329	0.2545	0.18398	0.13318
2.44	0.82331	0.74979	0.65865	0.55443	0.44573	0.34271	0.25371	0.18317	0.1326
2.45	0.82422	0.75063	0.65925	0.55465	0.44551	0.34213	0.25292	0.18237	0.13204
2.46	0.82512	0.75146	0.65984	0.55487	0.44529	0.34155	0.25214	0.18157	0.1315
2.47	0.82602	0.75229	0.66044	0.55509	0.44508	0.34097	0.25135	0.18078	0.13098
2.48	0.82692	0.75312	0.66104	0.5553	0.44486	0.34039	0.25058	0.18	0.13049
2.49	0.82781	0.75395	0.66163	0.55552	0.44465	0.33981	0.2498	0.17923	0.13001
2.5	0.8287	0.75477	0.66223	0.55574	0.44443	0.33924	0.24903	0.17846	0.12955
2.51	0.82959	0.75559	0.66282	0.55596	0.44422	0.33866	0.24826	0.1777	0.12912
2.52	0.83047	0.75641	0.66342	0.55617	0.444	0.33809	0.24749	0.17695	0.12872
2.53	0.83135	0.75723	0.66401	0.55639	0.44379	0.33751	0.24673	0.1762	0.12833
2.54	0.83222	0.75805	0.6646	0.55661	0.44357	0.33694	0.24597	0.17547	0.12798
2.55	0.83309	0.75886	0.66519	0.55682	0.44336	0.33637	0.24521	0.17474	0.12764
2.56	0.83396	0.75968	0.66579	0.55704	0.44314	0.3358	0.24446	0.17402	0.12734
2.57	0.83482	0.76049	0.66638	0.55726	0.44293	0.33523	0.2437	0.17331	0.12705
2.58	0.83568	0.7613	0.66697	0.55748	0.44271	0.33466	0.24296	0.17261	0.1268
2.59	0.83653	0.7621	0.66756	0.55769	0.4425	0.33409	0.24221	0.17191	0.12656
2.6	0.83739	0.76291	0.66815	0.55791	0.44228	0.33352	0.24147	0.17123	0.12635
2.61	0.83823	0.76371	0.66873	0.55813	0.44207	0.33296	0.24073	0.17056	0.12617
2.62	0.83908	0.76451	0.66932	0.55834	0.44186	0.33239	0.24	0.16989	0.126
2.63	0.83992	0.76531	0.66991	0.55856	0.44164	0.33183	0.23927	0.16924	0.12585
2.64	0.84076	0.76611	0.67049	0.55878	0.44143	0.33127	0.23854	0.1686	0.12572
2.65	0.84159	0.7669	0.67108	0.55899	0.44122	0.33071	0.23782	0.16796	0.12561
2.66	0.84242	0.7677	0.67167	0.55921	0.441	0.33015	0.2371	0.16734	0.12551
2.67	0.84324	0.76849	0.67225	0.55942	0.44079	0.32959	0.23638	0.16674	0.12543
2.68	0.84407	0.76927	0.67283	0.55964	0.44058	0.32903	0.23567	0.16614	0.12535
2.69	0.84489	0.77006	0.67342	0.55986	0.44036	0.32847	0.23496	0.16556	0.12529
2.7	0.8457	0.77085	0.674	0.56007	0.44015	0.32792	0.23426	0.16499	0.12524
2.71	0.84651	0.77163	0.67458	0.56029	0.43994	0.32736	0.23356	0.16443	0.12519
2.72	0.84732	0.77241	0.67516	0.5605	0.43972	0.32681	0.23286	0.16389	0.12516
2.73	0.84812	0.77319	0.67574	0.56072	0.43951	0.32625	0.23217	0.16336	0.12513
2.74	0.84892	0.77396	0.67632	0.56093	0.4393	0.3257	0.23148	0.16285	0.1251
2.75	0.84972	0.77474	0.6769	0.56115	0.43909	0.32515	0.23079	0.16236	0.12508
2.76	0.85051	0.77551	0.67748	0.56137	0.43887	0.3246	0.23011	0.16188	0.12506
2.77	0.8513	0.77628	0.67806	0.56158	0.43866	0.32406	0.22944	0.16141	0.12504
2.78	0.85209	0.77705	0.67863	0.5618	0.43845	0.32351	0.22877	0.16097	0.12503
2.79	0.85287	0.77782	0.67921	0.56201	0.43824	0.32296	0.2281	0.16054	0.12502
2.8	0.85365	0.77858	0.67979	0.56223	0.43803	0.32242	0.22744	0.16014	0.12501
2.81	0.85443	0.77934	0.68036	0.56244	0.43782	0.32188	0.22678	0.15975	0.125
2.82	0.8552	0.7801	0.68093	0.56266	0.43761	0.32133	0.22613	0.15938	0.12499
2.83	0.85597	0.78086	0.68151	0.56287	0.43739	0.32079	0.22548	0.15903	0.12499
2.84	0.85673	0.78162	0.68208	0.56308	0.43718	0.32026	0.22484	0.1587	0.12498
2.85	0.85749	0.78237	0.68265	0.5633	0.43697	0.31972	0.2242	0.15839	0.12498
2.86	0.85825	0.78312	0.68322	0.56351	0.43676	0.31918	0.22357	0.15811	0.12497
2.87	0.859	0.78387	0.68379	0.56373	0.43655	0.31865	0.22295	0.15784	0.12497
2.88	0.85975	0.78462	0.68436	0.56394	0.43634	0.31811	0.22233	0.15759	0.12497
2.89	0.8605	0.78537	0.68493	0.56416	0.43613	0.31758	0.22171	0.15736	0.12497
2.9	0.86125	0.78611	0.6855	0.56437	0.43592	0.31705	0.22111	0.15715	0.12497
2.91	0.86199	0.78685	0.68607	0.56458	0.43571	0.31652	0.2205	0.15697	0.12497
2.92	0.86272	0.78759	0.68664	0.5648	0.4355	0.316	0.21991	0.15679	0.12496
2.93	0.86346	0.78833	0.6872	0.56501	0.43529	0.31547	0.21932	0.15664	0.12496
2.94	0.86419	0.78907	0.68777	0.56522	0.43508	0.31494	0.21874	0.1565	0.12496
2.95	0.86491	0.7898	0.68833	0.56544	0.43488	0.31442	0.21816	0.15638	0.12496
2.96	0.86563	0.79053	0.6889	0.56565	0.43467	0.3139	0.2176	0.15627	0.12496
2.97	0.86635	0.79126	0.68946	0.56586	0.43446	0.31338	0.21704	0.15617	0.12496
2.98	0.86707	0.79199	0.69002	0.56608	0.43425	0.31286	0.21648	0.15608	0.12494
2.99	0.86778	0.79272	0.69059	0.56629	0.43404	0.31235	0.21594	0.15601	0.12489
3	0.86849	0.79344	0.69115	0.5665	0.43383	0.31183	0.2154	0.15594	0.12483
3.01	0.8692	0.79416	0.69171	0.56671	0.43363	0.31132	0.21488	0.15588	0.12476
3.02	0.8699	0.79488	0.69227	0.56693	0.43342	0.31081	0.21436	0.15583	0.12468
3.03	0.8706	0.7956	0.69283	0.56714	0.43321	0.3103	0.21385	0.15579	0.12459
3.04	0.8713	0.79631	0.69339	0.56735	0.43301	0.30979	0.21335	0.15575	0.12449
3.05	0.87199	0.79703	0.69394	0.56756	0.4328	0.30929	0.21286	0.15572	0.12438
3.06	0.87268	0.79774	0.6945	0.56777	0.43259	0.30878	0.21238	0.15569	0.12427
3.07	0.87336	0.79845	0.69506	0.56799	0.43239	0.30828	0.21191	0.15567	0.12416
3.08	0.87405	0.79915	0.69561	0.5682	0.43218	0.30778	0.21145	0.15565	0.12404
3.09	0.87472	0.79986	0.69617	0.56841	0.43197	0.30729	0.211	0.15563	0.12391
3.1	0.8754	0.80056	0.69672	0.56862	0.43177	0.30679	0.21057	0.15561	0.12379
3.11	0.87607	0.80126	0.69727	0.56883	0.43156	0.3063	0.21014	0.1556	0.12366
3.12	0.87674	0.80196	0.69782	0.56904	0.43136	0.30581	0.20973	0.15559	0.12353
3.13	0.87741	0.80266	0.69838	0.56925	0.43115	0.30532	0.20933	0.15558	0.1234
3.14	0.87807	0.80335	0.69893	0.56946	0.43095	0.30483	0.20895	0.15557	0.12327
3.15	0.87873	0.80404	0.69948	0.56968	0.43074	0.30435	0.20858	0.15556	0.12313
3.16	0.87939	0.80473	0.70003	0.56989	0.43054	0.30386	0.20822	0.15556	0.123
3.17	0.88004	0.80542	0.70057	0.5701	0.43034	0.30339	0.20788	0.15555	0.12286
3.18	0.88069	0.80611	0.70112	0.57031	0.43013	0.30291	0.20755	0.15555	0.12272
3.19	0.88134	0.80679	0.70167	0.57052	0.42993	0.30243	0.20723	0.15554	0.12259
3.2	0.88198	0.80748	0.70221	0.57073	0.42973	0.30196	0.20693	0.15554	0.12245
3.21	0.88262	0.80816	0.70276	0.57094	0.42952	0.30149	0.20665	0.15554	0.12231
3.22	0.88326	0.80884	0.7033	0.57115	0.42932	0.30103	0.20638	0.15553	0.12217
3.23	0.88389	0.80951	0.70385	0.57135	0.42912	0.30056	0.20613	0.15553	0.12203
3.24	0.88452	0.81019	0.70439	0.57156	0.42892	0.3001	0.20589	0.15553	0.12189
3.25	0.88515	0.81086	0.70493	0.57177	0.42872	0.29965	0.20567	0.15553	0.12175
3.26	0.88577	0.81153	0.70547	0.57198	0.42852	0.29919	0.20546	0.15553	0.12162
3.27	0.88639	0.8122	0.70601	0.57219	0.42832	0.29874	0.20527	0.15553	0.12148
3.28	0.88701	0.81286	0.70655	0.5724	0.42812	0.29829	0.20509	0.15553	0.12134
3.29	0.88763	0.81353	0.70709	0.57261	0.42792	0.29785	0.20493	0.15553	0.1212
3.3	0.88824	0.81419	0.70763	0.57282	0.42772	0.29741	0.20478	0.15552	0.12106
3.31	0.88885	0.81485	0.70817	0.57302	0.42752	0.29697	0.20464	0.15552	0.12093
3.32	0.88945	0.81551	0.7087	0.57323	0.42732	0.29654	0.20451	0.15552	0.12079
3.33	0.89005	0.81616	0.70924	0.57344	0.42712	0.29611	0.2044	0.15552	0.12065
3.34	0.89065	0.81682	0.70977	0.57365	0.42692	0.29568	0.2043	0.1555	0.12051
3.35	0.89125	0.81747	0.71031	0.57385	0.42672	0.29526	0.2042	0.15546	0.12038
3.36	0.89184	0.81812	0.71084	0.57406	0.42653	0.29484	0.20412	0.1554	0.12024
3.37	0.89243	0.81876	0.71137	0.57427	0.42633	0.29443	0.20404	0.15533	0.1201
3.38	0.89302	0.81941	0.7119	0.57448	0.42613	0.29402	0.20398	0.15525	0.11997
3.39	0.89361	0.82005	0.71243	0.57468	0.42594	0.29361	0.20392	0.15516	0.11983
3.4	0.89419	0.8207	0.71296	0.57489	0.42574	0.29321	0.20386	0.15507	0.1197
3.41	0.89476	0.82133	0.71349	0.57509	0.42554	0.29282	0.20381	0.15496	0.11956
3.42	0.89534	0.82197	0.71402	0.5753	0.42535	0.29243	0.20377	0.15485	0.11943
3.43	0.89591	0.82261	0.71454	0.57551	0.42516	0.29204	0.20374	0.15474	0.1193
3.44	0.89648	0.82324	0.71507	0.57571	0.42496	0.29166	0.2037	0.15462	0.11916
3.45	0.89705	0.82387	0.7156	0.57592	0.42477	0.29129	0.20367	0.15449	0.11903
3.46	0.89761	0.8245	0.71612	0.57612	0.42458	0.29092	0.20365	0.15437	0.1189
3.47	0.89817	0.82513	0.71664	0.57633	0.42438	0.29056	0.20362	0.15424	0.11876
3.48	0.89873	0.82575	0.71717	0.57653	0.42419	0.2902	0.2036	0.1541	0.11863
3.49	0.89928	0.82638	0.71769	0.57674	0.424	0.28985	0.20359	0.15397	0.1185
3.5	0.89983	0.827	0.71821	0.57694	0.42381	0.28951	0.20357	0.15383	0.11837
3.51	0.90038	0.82762	0.71873	0.57714	0.42362	0.28917	0.20356	0.15369	0.11824
3.52	0.90093	0.82823	0.71925	0.57735	0.42343	0.28884	0.20355	0.15355	0.11811
3.53	0.90147	0.82885	0.71977	0.57755	0.42324	0.28852	0.20354	0.15341	0.11798
3.54	0.90201	0.82946	0.72028	0.57775	0.42305	0.28821	0.20353	0.15327	0.11785
3.55	0.90255	0.83007	0.7208	0.57796	0.42286	0.2879	0.20352	0.15313	0.11772
3.56	0.90308	0.83068	0.72131	0.57816	0.42267	0.2876	0.20351	0.15298	0.11759
3.57	0.90362	0.83129	0.72183	0.57836	0.42249	0.28731	0.20351	0.15284	0.11746
3.58	0.90414	0.83189	0.72234	0.57856	0.4223	0.28703	0.2035	0.15269	0.11733
3.59	0.90467	0.8325	0.72285	0.57877	0.42212	0.28675	0.2035	0.15255	0.1172
3.6	0.90519	0.8331	0.72337	0.57897	0.42193	0.28649	0.20349	0.1524	0.11708
3.61	0.90571	0.83369	0.72388	0.57917	0.42175	0.28623	0.20349	0.15225	0.11695
3.62	0.90623	0.83429	0.72439	0.57937	0.42156	0.28598	0.20348	0.15211	0.11682
3.63	0.90674	0.83489	0.7249	0.57957	0.42138	0.28575	0.20348	0.15196	0.1167
3.64	0.90726	0.83548	0.7254	0.57977	0.4212	0.28552	0.20348	0.15181	0.11657
3.65	0.90777	0.83607	0.72591	0.57997	0.42102	0.2853	0.20348	0.15167	0.11644
3.66	0.90827	0.83666	0.72642	0.58017	0.42084	0.28509	0.20348	0.15152	0.11632
3.67	0.90878	0.83724	0.72692	0.58037	0.42066	0.28489	0.20347	0.15137	0.11619
3.68	0.90928	0.83783	0.72742	0.58057	0.42048	0.2847	0.20347	0.15122	0.11607
3.69	0.90977	0.83841	0.72793	0.58077	0.4203	0.28452	0.20347	0.15108	0.11594
3.7	0.91027	0.83899	0.72843	0.58097	0.42013	0.28435	0.20347	0.15093	0.11582
3.71	0.91076	0.83957	0.72893	0.58117	0.41995	0.28418	0.20347	0.15079	0.1157
3.72	0.91125	0.84015	0.72943	0.58137	0.41977	0.28403	0.20347	0.15064	0.11557
3.73	0.91174	0.84072	0.72993	0.58156	0.4196	0.28389	0.20347	0.15049	0.11545
3.74	0.91222	0.84129	0.73043	0.58176	0.41943	0.28376	0.20347	0.15035	0.11533
3.75	0.91271	0.84186	0.73092	0.58196	0.41926	0.28363	0.20347	0.1502	0.11521
3.76	0.91319	0.84243	0.73142	0.58215	0.41908	0.28351	0.20347	0.15006	0.11508
3.77	0.91366	0.843	0.73192	0.58235	0.41891	0.28341	0.20347	0.14991	0.11496
3.78	0.91414	0.84356	0.73241	0.58255	0.41875	0.28331	0.20346	0.14977	0.11484
3.79	0.91461	0.84412	0.7329	0.58274	0.41858	0.28321	0.20344	0.14962	0.11472
3.8	0.91508	0.84468	0.73339	0.58294	0.41841	0.28313	0.20341	0.14948	0.1146
3.81	0.91554	0.84524	0.73389	0.58313	0.41825	0.28305	0.20336	0.14934	0.11448
3.82	0.91601	0.8458	0.73438	0.58333	0.41808	0.28298	0.20329	0.14919	0.11436
3.83	0.91647	0.84635	0.73486	0.58352	0.41792	0.28291	0.20322	0.14905	0.11424
3.84	0.91692	0.8469	0.73535	0.58371	0.41776	0.28285	0.20314	0.14891	0.11412
3.85	0.91738	0.84745	0.73584	0.58391	0.4176	0.2828	0.20305	0.14877	0.114
3.86	0.91783	0.848	0.73632	0.5841	0.41744	0.28275	0.20295	0.14862	0.11388
3.87	0.91828	0.84855	0.73681	0.58429	0.41728	0.2827	0.20285	0.14848	0.11376
3.88	0.91873	0.84909	0.73729	0.58448	0.41713	0.28266	0.20274	0.14834	0.11365
3.89	0.91918	0.84963	0.73777	0.58468	0.41697	0.28262	0.20263	0.1482	0.11353
3.9	0.91962	0.85017	0.73826	0.58487	0.41682	0.28259	0.20251	0.14806	0.11341
3.91	0.92006	0.85071	0.73874	0.58506	0.41667	0.28256	0.20239	0.14792	0.1133
3.92	0.9205	0.85125	0.73921	0.58525	0.41652	0.28253	0.20226	0.14778	0.11318
3.93	0.92093	0.85178	0.73969	0.58544	0.41638	0.2825	0.20214	0.14764	0.11306
3.94	0.92137	0.85231	0.74017	0.58563	0.41623	0.28248	0.20201	0.1475	0.11295
3.95	0.9218	0.85284	0.74064	0.58581	0.41609	0.28246	0.20187	0.14737	0.11283
3.96	0.92223	0.85337	0.74112	0.586	0.41595	0.28244	0.20174	0.14723	0.11272
3.97	0.92265	0.85389	0.74159	0.58619	0.41581	0.28243	0.2016	0.14709	0.1126
3.98	0.92307	0.85442	0.74206	0.58638	0.41567	0.28241	0.20146	0.14695	0.11249
3.99	0.9235	0.85494	0.74253	0.58656	0.41553	0.2824	0.20132	0.14682	0.11237
4	0.92391	0.85546	0.743	0.58675	0.4154	0.28239	0.20118	0.14668	0.11226
4.01	0.92433	0.85597	0.74347	0.58694	0.41527	0.28238	0.20104	0.14654	0.11214
4.02	0.92474	0.85649	0.74394	0.58712	0.41514	0.28237	0.20089	0.14641	0.11203
4.03	0.92515	0.857	0.74441	0.5873	0.41501	0.28236	0.20075	0.14627	0.11192
4.04	0.92556	0.85751	0.74487	0.58749	0.41489	0.28235	0.2006	0.14614	0.1118
4.05	0.92597	0.85802	0.74533	0.58767	0.41477	0.28235	0.20046	0.146	0.11169
4.06	0.92637	0.85853	0.7458	0.58785	0.41465	0.28234	0.20031	0.14587	0.11158
4.07	0.92677	0.85904	0.74626	0.58803	0.41454	0.28233	0.20016	0.14573	0.11147
4.08	0.92717	0.85954	0.74672	0.58822	0.41442	0.28233	0.20001	0.1456	0.11135
4.09	0.92757	0.86004	0.74718	0.5884	0.41431	0.28232	0.19986	0.14547	0.11124
4.1	0.92796	0.86054	0.74763	0.58858	0.41421	0.28232	0.19972	0.14533	0.11113
4.11	0.92835	0.86104	0.74809	0.58875	0.4141	0.28232	0.19957	0.1452	0.11102
4.12	0.92874	0.86153	0.74854	0.58893	0.414	0.28231	0.19942	0.14507	0.11091
4.13	0.92913	0.86202	0.749	0.58911	0.4139	0.28231	0.19927	0.14494	0.1108
4.14	0.92951	0.86251	0.74945	0.58929	0.41381	0.28231	0.19912	0.1448	0.11069
4.15	0.9299	0.863	0.7499	0.58946	0.41371	0.28231	0.19897	0.14467	0.11058
4.16	0.93028	0.86349	0.75035	0.58964	0.41362	0.2823	0.19882	0.14454	0.11047
4.17	0.93065	0.86397	0.7508	0.58981	0.41354	0.2823	0.19867	0.14441	0.11036
4.18	0.93103	0.86446	0.75124	0.58998	0.41346	0.2823	0.19852	0.14428	0.11025
4.19	0.9314	0.86494	0.75169	0.59016	0.41338	0.2823	0.19837	0.14415	0.11014
4.2	0.93177	0.86541	0.75213	0.59033	0.4133	0.2823	0.19822	0.14402	0.11004
4.21	0.93214	0.86589	0.75257	0.5905	0.41323	0.2823	0.19807	0.14389	0.10993
4.22	0.93251	0.86636	0.75302	0.59067	0.41316	0.2823	0.19792	0.14376	0.10982
4.23	0.93287	0.86684	0.75345	0.59084	0.41309	0.2823	0.19777	0.14364	0.10971
4.24	0.93323	0.86731	0.75389	0.591	0.41303	0.28229	0.19763	0.14351	0.1096
4.25	0.93359	0.86777	0.75433	0.59117	0.41297	0.28229	0.19748	0.14338	0.1095
4.26	0.93395	0.86824	0.75476	0.59134	0.41291	0.28229	0.19733	0.14325	0.10939
4.27	0.93431	0.8687	0.7552	0.5915	0.41286	0.28229	0.19718	0.14313	0.10928
4.28	0.93466	0.86916	0.75563	0.59166	0.4128	0.28229	0.19703	0.143	0.10918
4.29	0.93501	0.86962	0.75606	0.59183	0.41276	0.28229	0.19689	0.14287	0.10907
4.3	0.93536	0.87008	0.75649	0.59199	0.41271	0.28229	0.19674	0.14275	0.10897
4.31	0.9357	0.87054	0.75691	0.59215	0.41267	0.28229	0.19659	0.14262	0.10886
4.32	0.93605	0.87099	0.75734	0.5923	0.41263	0.28229	0.19645	0.1425	0.10876
4.33	0.93639	0.87144	0.75776	0.59246	0.41259	0.28229	0.1963	0.14237	0.10865
4.34	0.93673	0.87189	0.75818	0.59262	0.41256	0.28228	0.19615	0.14225	0.10855
4.35	0.93707	0.87233	0.7586	0.59277	0.41252	0.28225	0.19601	0.14212	0.10844
4.36	0.9374	0.87278	0.75902	0.59293	0.41249	0.28221	0.19586	0.142	0.10834
4.37	0.93773	0.87322	0.75944	0.59308	0.41247	0.28216	0.19572	0.14187	0.10823
4.38	0.93806	0.87366	0.75985	0.59323	0.41244	0.2821	0.19557	0.14175	0.10813
4.39	0.93839	0.8741	0.76027	0.59338	0.41242	0.28204	0.19543	0.14163	0.10803
4.4	0.93872	0.87453	0.76068	0.59352	0.41239	0.28197	0.19528	0.1415	0.10792
4.41	0.93904	0.87497	0.76109	0.59367	0.41237	0.28189	0.19514	0.14138	0.10782
4.42	0.93936	0.8754	0.76149	0.59381	0.41235	0.28181	0.195	0.14126	0.10772
4.43	0.93968	0.87583	0.7619	0.59396	0.41234	0.28172	0.19485	0.14114	0.10762
4.44	0.94	0.87625	0.7623	0.5941	0.41232	0.28163	0.19471	0.14101	0.10752
4.45	0.94032	0.87668	0.7627	0.59423	0.4123	0.28154	0.19457	0.14089	0.10741
4.46	0.94063	0.8771	0.7631	0.59437	0.41229	0.28144	0.19442	0.14077	0.10731
4.47	0.94094	0.87752	0.7635	0.59451	0.41228	0.28134	0.19428	0.14065	0.10721
4.48	0.94125	0.87794	0.7639	0.59464	0.41227	0.28123	0.19414	0.14053	0.10711
4.49	0.94156	0.87835	0.76429	0.59477	0.41226	0.28113	0.194	0.14041	0.10701
4.5	0.94186	0.87877	0.76468	0.5949	0.41225	0.28102	0.19386	0.14029	0.10691
4.51	0.94216	0.87918	0.76507	0.59503	0.41224	0.28091	0.19372	0.14017	0.10681
4.52	0.94246	0.87959	0.76546	0.59515	0.41223	0.28079	0.19358	0.14005	0.10671
4.53	0.94276	0.87999	0.76584	0.59528	0.41222	0.28068	0.19344	0.13993	0.10661
4.54	0.94306	0.88039	0.76622	0.5954	0.41221	0.28056	0.1933	0.13981	0.10651
4.55	0.94335	0.8808	0.7666	0.59551	0.41221	0.28044	0.19316	0.13969	0.10641
4.56	0.94364	0.8812	0.76698	0.59563	0.4122	0.28032	0.19302	0.13958	0.10631
4.57	0.94393	0.88159	0.76736	0.59574	0.4122	0.2802	0.19288	0.13946	0.10621
4.58	0.94422	0.88199	0.76773	0.59586	0.41219	0.28008	0.19275	0.13934	0.10611
4.59	0.94451	0.88238	0.7681	0.59596	0.41219	0.27995	0.19261	0.13922	0.10601
4.6	0.94479	0.88277	0.76847	0.59607	0.41219	0.27983	0.19247	0.13911	0.10592
4.61	0.94507	0.88315	0.76883	0.59617	0.41218	0.2797	0.19233	0.13899	0.10582
4.62	0.94535	0.88354	0.76919	0.59627	0.41218	0.27958	0.1922	0.13887	0.10572
4.63	0.94562	0.88392	0.76955	0.59637	0.41218	0.27945	0.19206	0.13876	0.10562
4.64	0.9459	0.8843	0.76991	0.59647	0.41217	0.27932	0.19192	0.13864	0.10553
4.65	0.94617	0.88468	0.77026	0.59656	0.41217	0.27919	0.19179	0.13853	0.10543
4.66	0.94644	0.88505	0.77061	0.59665	0.41217	0.27906	0.19165	0.13841	0.10533
4.67	0.94671	0.88542	0.77096	0.59674	0.41217	0.27893	0.19152	0.1383	0.10523
4.68	0.94698	0.88579	0.77131	0.59682	0.41216	0.27881	0.19138	0.13818	0.10514
4.69	0.94724	0.88616	0.77165	0.5969	0.41216	0.27868	0.19125	0.13807	0.10504
4.7	0.9475	0.88652	0.77199	0.59698	0.41216	0.27854	0.19112	0.13795	0.10495
4.71	0.94776	0.88688	0.77232	0.59706	0.41216	0.27841	0.19098	0.13784	0.10485
4.72	0.94802	0.88724	0.77265	0.59713	0.41216	0.27828	0.19085	0.13772	0.10476
4.73	0.94827	0.8876	0.77298	0.5972	0.41216	0.27815	0.19071	0.13761	0.10466
4.74	0.94852	0.88795	0.77331	0.59727	0.41216	0.27802	0.19058	0.1375	0.10456
4.75	0.94878	0.8883	0.77363	0.59733	0.41216	0.27789	0.19045	0.13738	0.10447
4.76	0.94902	0.88865	0.77395	0.5974	0.41215	0.27776	0.19032	0.13727	0.10438
4.77	0.94927	0.88899	0.77426	0.59746	0.41215	0.27763	0.19019	0.13716	0.10428
4.78	0.94951	0.88933	0.77457	0.59751	0.41215	0.27749	0.19005	0.13705	0.10419
4.79	0.94976	0.88967	0.77488	0.59756	0.41215	0.27736	0.18992	0.13693	0.10409
4.8	0.94999	0.89	0.77518	0.59762	0.41215	0.27723	0.18979	0.13682	0.104
4.81	0.95023	0.89034	0.77548	0.59766	0.41215	0.2771	0.18966	0.13671	0.10391
4.82	0.95047	0.89067	0.77577	0.59771	0.41215	0.27697	0.18953	0.1366	0.10381
4.83	0.9507	0.89099	0.77606	0.59775	0.41215	0.27684	0.1894	0.13649	0.10372
4.84	0.95093	0.89132	0.77635	0.59779	0.41215	0.27671	0.18927	0.13638	0.10363
4.85	0.95116	0.89164	0.77663	0.59783	0.41215	0.27657	0.18914	0.13627	0.10353
4.86	0.95138	0.89195	0.77691	0.59787	0.41215	0.27644	0.18901	0.13616	0.10344
4.87	0.95161	0.89227	0.77718	0.5979	0.41215	0.27631	0.18888	0.13605	0.10335
4.88	0.95183	0.89258	0.77745	0.59794	0.41215	0.27618	0.18876	0.13594	0.10326
4.89	0.95205	0.89288	0.77771	0.59797	0.41215	0.27605	0.18863	0.13583	0.10317
4.9	0.95226	0.89318	0.77797	0.598	0.41215	0.27592	0.1885	0.13572	0.10307
4.91	0.95248	0.89348	0.77822	0.59802	0.41215	0.27579	0.18837	0.13561	0.10298
4.92	0.95269	0.89378	0.77847	0.59805	0.41215	0.27566	0.18825	0.1355	0.10289
4.93	0.9529	0.89407	0.77871	0.59807	0.41215	0.27553	0.18812	0.1354	0.1028
4.94	0.9531	0.89436	0.77895	0.59809	0.41215	0.2754	0.18799	0.13529	0.10271
4.95	0.95331	0.89465	0.77918	0.59811	0.41215	0.27527	0.18787	0.13518	0.10262
4.96	0.95351	0.89493	0.77941	0.59813	0.41215	0.27514	0.18774	0.13507	0.10253
4.97	0.95371	0.89521	0.77963	0.59815	0.41215	0.27501	0.18761	0.13496	0.10244
4.98	0.9539	0.89548	0.77985	0.59816	0.41214	0.27488	0.18749	0.13486	0.10235
4.99	0.9541	0.89575	0.78006	0.59818	0.41213	0.27475	0.18736	0.13475	0.10226
5	0.95429	0.89601	0.78026	0.59819	0.41211	0.27462	0.18724	0.13464	0.10217
5.01	0.95448	0.89628	0.78046	0.59821	0.41209	0.27449	0.18711	0.13454	0.10208
5.02	0.95466	0.89653	0.78066	0.59822	0.41207	0.27436	0.18699	0.13443	0.10199
5.03	0.95485	0.89679	0.78084	0.59823	0.41204	0.27424	0.18687	0.13433	0.1019
5.04	0.95503	0.89704	0.78102	0.59824	0.41202	0.27411	0.18674	0.13422	0.10181
5.05	0.9552	0.89728	0.7812	0.59825	0.41198	0.27398	0.18662	0.13411	0.10172
5.06	0.95538	0.89752	0.78137	0.59826	0.41195	0.27385	0.1865	0.13401	0.10163
5.07	0.95555	0.89775	0.78153	0.59827	0.41191	0.27373	0.18637	0.1339	0.10155
5.08	0.95572	0.89798	0.78169	0.59827	0.41187	0.2736	0.18625	0.1338	0.10146
5.09	0.95589	0.89821	0.78184	0.59828	0.41183	0.27347	0.18613	0.13369	0.10137
5.1	0.95605	0.89843	0.78199	0.59829	0.41179	0.27335	0.18601	0.13359	0.10128
5.11	0.95621	0.89865	0.78213	0.59829	0.41175	0.27322	0.18588	0.13349	0.1012
5.12	0.95637	0.89886	0.78226	0.5983	0.4117	0.2731	0.18576	0.13338	0.10111
5.13	0.95652	0.89907	0.78239	0.5983	0.41166	0.27297	0.18564	0.13328	0.10102
5.14	0.95667	0.89927	0.78251	0.59831	0.41161	0.27284	0.18552	0.13317	0.10093
5.15	0.95682	0.89946	0.78263	0.59831	0.41156	0.27272	0.1854	0.13307	0.10085
5.16	0.95697	0.89966	0.78274	0.59832	0.41151	0.27259	0.18528	0.13297	0.10076
5.17	0.95711	0.89984	0.78285	0.59832	0.41146	0.27247	0.18516	0.13287	0.10067
5.18	0.95725	0.90002	0.78295	0.59832	0.41141	0.27235	0.18504	0.13276	0.10059
5.19	0.95738	0.9002	0.78304	0.59833	0.41136	0.27222	0.18492	0.13266	0.1005
5.2	0.95751	0.90037	0.78313	0.59833	0.41131	0.2721	0.1848	0.13256	0.10042
5.21	0.95764	0.90053	0.78322	0.59833	0.41125	0.27197	0.18468	0.13246	0.10033
5.22	0.95777	0.90069	0.7833	0.59834	0.4112	0.27185	0.18456	0.13236	0.10025
5.23	0.95789	0.90085	0.78338	0.59834	0.41114	0.27173	0.18444	0.13225	0.10016
5.24	0.95801	0.90099	0.78345	0.59834	0.41109	0.27161	0.18432	0.13215	0.10008
5.25	0.95812	0.90114	0.78352	0.59834	0.41103	0.27148	0.18421	0.13205	0.09999
5.26	0.95823	0.90127	0.78358	0.59834	0.41097	0.27136	0.18409	0.13195	0.09991
5.27	0.95834	0.90141	0.78364	0.59834	0.41092	0.27124	0.18397	0.13185	0.09982
5.28	0.95844	0.90153	0.7837	0.59835	0.41086	0.27112	0.18385	0.13175	0.09974
5.29	0.95854	0.90166	0.78375	0.59835	0.4108	0.271	0.18374	0.13165	0.09965
5.3	0.95864	0.90177	0.7838	0.59835	0.41074	0.27088	0.18362	0.13155	0.09957
5.31	0.95874	0.90188	0.78384	0.59835	0.41069	0.27075	0.1835	0.13145	0.09948
5.32	0.95883	0.90199	0.78389	0.59835	0.41063	0.27063	0.18339	0.13135	0.0994
5.33	0.95891	0.90209	0.78393	0.59835	0.41057	0.27051	0.18327	0.13125	0.09932
5.34	0.959	0.90219	0.78396	0.59835	0.41051	0.27039	0.18315	0.13115	0.09923
5.35	0.95908	0.90228	0.784	0.59835	0.41045	0.27027	0.18304	0.13105	0.09915
5.36	0.95915	0.90237	0.78403	0.59835	0.41039	0.27015	0.18292	0.13095	0.09907
5.37	0.95923	0.90245	0.78406	0.59836	0.41033	0.27004	0.18281	0.13086	0.09899
5.38	0.95929	0.90253	0.78409	0.59836	0.41027	0.26992	0.18269	0.13076	0.0989
5.39	0.95936	0.9026	0.78412	0.59836	0.41021	0.2698	0.18258	0.13066	0.09882
5.4	0.95942	0.90267	0.78414	0.59836	0.41015	0.26968	0.18246	0.13056	0.09874
5.41	0.95948	0.90274	0.78416	0.59836	0.41009	0.26956	0.18235	0.13046	0.09866
5.42	0.95954	0.9028	0.78419	0.59836	0.41002	0.26944	0.18224	0.13037	0.09857
5.43	0.9596	0.90286	0.7842	0.59836	0.40996	0.26933	0.18212	0.13027	0.09849
5.44	0.95965	0.90291	0.78422	0.59836	0.4099	0.26921	0.18201	0.13017	0.09841
5.45	0.95969	0.90296	0.78424	0.59836	0.40984	0.26909	0.18189	0.13008	0.09833
5.46	0.95974	0.90301	0.78425	0.59836	0.40978	0.26897	0.18178	0.12998	0.09825
5.47	0.95978	0.90305	0.78427	0.59836	0.40972	0.26886	0.18167	0.12988	0.09817
5.48	0.95982	0.9031	0.78428	0.59836	0.40966	0.26874	0.18156	0.12979	0.09809
5.49	0.95986	0.90313	0.78429	0.59836	0.4096	0.26862	0.18144	0.12969	0.09801
5.5	0.9599	0.90317	0.78431	0.59836	0.40953	0.26851	0.18133	0.12959	0.09792
5.51	0.95993	0.9032	0.78432	0.59836	0.40947	0.26839	0.18122	0.1295	0.09784
5.52	0.95996	0.90324	0.78433	0.59836	0.40941	0.26828	0.18111	0.1294	0.09776
5.53	0.95999	0.90327	0.78434	0.59836	0.40935	0.26816	0.181	0.12931	0.09768
5.54	0.96002	0.90329	0.78434	0.59836	0.40929	0.26805	0.18089	0.12921	0.0976
5.55	0.96004	0.90332	0.78435	0.59836	0.40923	0.26793	0.18078	0.12912	0.09752
5.56	0.96007	0.90334	0.78436	0.59836	0.40916	0.26782	0.18066	0.12902	0.09744
5.57	0.96009	0.90336	0.78436	0.59836	0.4091	0.2677	0.18055	0.12893	0.09736
5.58	0.96011	0.90338	0.78437	0.59836	0.40904	0.26759	0.18044	0.12883	0.09729
5.59	0.96013	0.9034	0.78438	0.59836	0.40898	0.26748	0.18033	0.12874	0.09721
5.6	0.96014	0.90342	0.78438	0.59837	0.40892	0.26736	0.18022	0.12865	0.09713
5.61	0.96016	0.90344	0.78439	0.59838	0.40886	0.26725	0.18011	0.12855	0.09705
5.62	0.96018	0.90345	0.78439	0.59839	0.40879	0.26714	0.18001	0.12846	0.09697
5.63	0.96019	0.90346	0.78439	0.59841	0.40873	0.26702	0.1799	0.12837	0.09689
5.64	0.9602	0.90348	0.7844	0.59844	0.40867	0.26691	0.17979	0.12827	0.09681
5.65	0.96021	0.90349	0.7844	0.59846	0.40861	0.2668	0.17968	0.12818	0.09673
5.66	0.96023	0.9035	0.78441	0.59849	0.40855	0.26669	0.17957	0.12809	0.09666
5.67	0.96024	0.90351	0.78441	0.59853	0.40849	0.26657	0.17946	0.12799	0.09658
5.68	0.96024	0.90352	0.78441	0.59856	0.40843	0.26646	0.17935	0.1279	0.0965
5.69	0.96025	0.90353	0.78441	0.5986	0.40836	0.26635	0.17925	0.12781	0.09642
5.7	0.96026	0.90354	0.78442	0.59864	0.4083	0.26624	0.17914	0.12772	0.09635
5.71	0.96027	0.90354	0.78442	0.59868	0.40824	0.26613	0.17903	0.12762	0.09627
5.72	0.96028	0.90355	0.78442	0.59872	0.40818	0.26602	0.17892	0.12753	0.09619
5.73	0.96028	0.90356	0.78442	0.59877	0.40812	0.26591	0.17882	0.12744	0.09611
5.74	0.96029	0.90356	0.78442	0.59882	0.40806	0.2658	0.17871	0.12735	0.09604
5.75	0.96029	0.90357	0.78442	0.59886	0.408	0.26569	0.1786	0.12726	0.09596
5.76	0.9603	0.90357	0.78443	0.59891	0.40794	0.26558	0.1785	0.12717	0.09588
5.77	0.9603	0.90358	0.78443	0.59896	0.40788	0.26547	0.17839	0.12708	0.09581
5.78	0.96031	0.90358	0.78443	0.59901	0.40782	0.26536	0.17828	0.12699	0.09573
5.79	0.96031	0.90358	0.78443	0.59907	0.40776	0.26525	0.17818	0.1269	0.09566
5.8	0.96031	0.90359	0.78443	0.59912	0.4077	0.26514	0.17807	0.12681	0.09558
5.81	0.96032	0.90359	0.78443	0.59918	0.40764	0.26503	0.17797	0.12672	0.0955
5.82	0.96032	0.90359	0.78443	0.59923	0.40758	0.26492	0.17786	0.12663	0.09543
5.83	0.96032	0.9036	0.78443	0.59929	0.40752	0.26481	0.17776	0.12654	0.09535
5.84	0.96033	0.9036	0.78443	0.59935	0.40746	0.2647	0.17765	0.12645	0.09528
5.85	0.96033	0.9036	0.78444	0.5994	0.4074	0.2646	0.17755	0.12636	0.0952
5.86	0.96033	0.9036	0.78444	0.59946	0.40734	0.26449	0.17744	0.12627	0.09513
5.87	0.96033	0.9036	0.78444	0.59952	0.40728	0.26438	0.17734	0.12618	0.09505
5.88	0.96033	0.90361	0.78444	0.59958	0.40722	0.26427	0.17724	0.12609	0.09498
5.89	0.96034	0.90361	0.78444	0.59964	0.40716	0.26417	0.17713	0.126	0.0949
5.9	0.96034	0.90361	0.78444	0.59971	0.4071	0.26406	0.17703	0.12591	0.09483
5.91	0.96034	0.90361	0.78444	0.59977	0.40704	0.26395	0.17693	0.12582	0.09475
5.92	0.96034	0.90361	0.78444	0.59983	0.40698	0.26385	0.17682	0.12574	0.09468
5.93	0.96034	0.90361	0.78444	0.59989	0.40692	0.26374	0.17672	0.12565	0.09461
5.94	0.96034	0.90361	0.78444	0.59996	0.40686	0.26363	0.17662	0.12556	0.09453
5.95	0.96034	0.90362	0.78444	0.60002	0.40681	0.26353	0.17651	0.12547	0.09446
5.96	0.96034	0.90362	0.78444	0.60008	0.40675	0.26342	0.17641	0.12538	0.09438
5.97	0.96034	0.90362	0.78444	0.60015	0.40669	0.26332	0.17631	0.1253	0.09431
5.98	0.96035	0.90362	0.78444	0.60021	0.40663	0.26321	0.17621	0.12521	0.09424
5.99	0.96035	0.90362	0.78445	0.60028	0.40657	0.26311	0.17611	0.12512	0.09416
6	0.96035	0.90362	0.78448	0.60034	0.40651	0.263	0.176	0.12504	0.09409
6.01	0.96035	0.90362	0.78451	0.60041	0.40646	0.2629	0.1759	0.12495	0.09402
6.02	0.96035	0.90362	0.78455	0.60048	0.4064	0.26279	0.1758	0.12486	0.09395
6.03	0.96035	0.90362	0.7846	0.60054	0.40634	0.26269	0.1757	0.12478	0.09387
6.04	0.96035	0.90362	0.78466	0.60061	0.40628	0.26258	0.1756	0.12469	0.0938
6.05	0.96035	0.90362	0.78472	0.60067	0.40622	0.26248	0.1755	0.1246	0.09373
6.06	0.96035	0.90362	0.78479	0.60074	0.40617	0.26238	0.1754	0.12452	0.09366
6.07	0.96035	0.90362	0.78486	0.60081	0.40611	0.26227	0.1753	0.12443	0.09358
6.08	0.96035	0.90362	0.78494	0.60088	0.40605	0.26217	0.1752	0.12435	0.09351
6.09	0.96035	0.90362	0.78503	0.60094	0.40599	0.26207	0.1751	0.12426	0.09344
6.1	0.96035	0.90362	0.78512	0.60101	0.40594	0.26196	0.175	0.12417	0.09337
6.11	0.96035	0.90362	0.78521	0.60108	0.40588	0.26186	0.1749	0.12409	0.0933
6.12	0.96035	0.90362	0.7853	0.60115	0.40582	0.26176	0.1748	0.124	0.09322
6.13	0.96035	0.90363	0.7854	0.60121	0.40577	0.26165	0.1747	0.12392	0.09315
6.14	0.96035	0.90363	0.78551	0.60128	0.40571	0.26155	0.1746	0.12383	0.09308
6.15	0.96035	0.90364	0.78561	0.60135	0.40565	0.26145	0.1745	0.12375	0.09301
6.16	0.96035	0.90366	0.78572	0.60142	0.4056	0.26135	0.1744	0.12367	0.09294
6.17	0.96035	0.90368	0.78583	0.60149	0.40554	0.26125	0.17431	0.12358	0.09287
6.18	0.96035	0.90372	0.78594	0.60155	0.40548	0.26115	0.17421	0.1235	0.0928
6.19	0.96035	0.90376	0.78606	0.60162	0.40543	0.26104	0.17411	0.12341	0.09273
6.2	0.96036	0.90381	0.78617	0.60169	0.40537	0.26094	0.17401	0.12333	0.09266
6.21	0.96037	0.90387	0.78629	0.60176	0.40532	0.26084	0.17391	0.12325	0.09259
6.22	0.96039	0.90392	0.78641	0.60183	0.40526	0.26074	0.17382	0.12316	0.09252
6.23	0.96041	0.90399	0.78654	0.60189	0.4052	0.26064	0.17372	0.12308	0.09245
6.24	0.96044	0.90406	0.78666	0.60196	0.40515	0.26054	0.17362	0.123	0.09238
6.25	0.96047	0.90413	0.78679	0.60203	0.40509	0.26044	0.17352	0.12291	0.09231
6.26	0.9605	0.9042	0.78691	0.6021	0.40504	0.26034	0.17343	0.12283	0.09224
6.27	0.96054	0.90428	0.78704	0.60217	0.40498	0.26024	0.17333	0.12275	0.09217
6.28	0.96057	0.90436	0.78717	0.60224	0.40493	0.26014	0.17323	0.12266	0.0921
6.29	0.96061	0.90445	0.7873	0.6023	0.40487	0.26004	0.17314	0.12258	0.09203
6.3	0.96066	0.90453	0.78744	0.60237	0.40482	0.25994	0.17304	0.1225	0.09196
6.31	0.9607	0.90462	0.78757	0.60244	0.40476	0.25984	0.17295	0.12242	0.09189
6.32	0.96075	0.90471	0.7877	0.60251	0.40471	0.25974	0.17285	0.12234	0.09182
6.33	0.9608	0.90481	0.78784	0.60258	0.40465	0.25964	0.17275	0.12225	0.09175
6.34	0.96085	0.9049	0.78797	0.60264	0.4046	0.25955	0.17266	0.12217	0.09168
6.35	0.9609	0.905	0.78811	0.60271	0.40454	0.25945	0.17256	0.12209	0.09162
6.36	0.96096	0.9051	0.78825	0.60278	0.40449	0.25935	0.17247	0.12201	0.09155
6.37	0.96101	0.9052	0.78839	0.60285	0.40444	0.25925	0.17237	0.12193	0.09148
6.38	0.96107	0.9053	0.78853	0.60292	0.40438	0.25915	0.17228	0.12185	0.09141
6.39	0.96113	0.9054	0.78866	0.60298	0.40433	0.25906	0.17218	0.12177	0.09134
6.4	0.96118	0.90551	0.7888	0.60305	0.40427	0.25896	0.17209	0.12169	0.09128
6.41	0.96124	0.90561	0.78895	0.60312	0.40422	0.25886	0.17199	0.1216	0.09121
6.42	0.9613	0.90572	0.78909	0.60319	0.40417	0.25876	0.1719	0.12152	0.09114
6.43	0.96136	0.90583	0.78923	0.60325	0.40411	0.25867	0.17181	0.12144	0.09107
6.44	0.96143	0.90594	0.78937	0.60332	0.40406	0.25857	0.17171	0.12136	0.091
6.45	0.96149	0.90605	0.78951	0.60339	0.404	0.25847	0.17162	0.12128	0.09094
6.46	0.96155	0.90616	0.78965	0.60346	0.40395	0.25838	0.17153	0.1212	0.09087
6.47	0.96162	0.90627	0.7898	0.60352	0.4039	0.25828	0.17143	0.12112	0.0908
6.48	0.96168	0.90638	0.78994	0.60359	0.40384	0.25818	0.17134	0.12104	0.09074
6.49	0.96175	0.90649	0.79008	0.60366	0.40379	0.25809	0.17125	0.12096	0.09067
6.5	0.96181	0.90661	0.79023	0.60372	0.40374	0.25799	0.17115	0.12088	0.0906
6.51	0.96188	0.90672	0.79037	0.60379	0.40369	0.25789	0.17106	0.12081	0.09054
6.52	0.96194	0.90684	0.79052	0.60386	0.40363	0.2578	0.17097	0.12073	0.09047
6.53	0.96201	0.90695	0.79066	0.60392	0.40358	0.2577	0.17088	0.12065	0.0904
6.54	0.96208	0.90707	0.7908	0.60399	0.40353	0.25761	0.17078	0.12057	0.09034
6.55	0.96214	0.90718	0.79095	0.60406	0.40347	0.25751	0.17069	0.12049	0.09027
6.56	0.96221	0.9073	0.79109	0.60412	0.40342	0.25742	0.1706	0.12041	0.0902
6.57	0.96228	0.90742	0.79124	0.60419	0.40337	0.25732	0.17051	0.12033	0.09014
6.58	0.96235	0.90753	0.79138	0.60425	0.40332	0.25723	0.17042	0.12025	0.09007
6.59	0.96242	0.90765	0.79153	0.60432	0.40327	0.25713	0.17032	0.12018	0.09001
6.6	0.96248	0.90777	0.79167	0.60439	0.40321	0.25704	0.17023	0.1201	0.08994
6.61	0.96255	0.90788	0.79182	0.60445	0.40316	0.25695	0.17014	0.12002	0.08988
6.62	0.96262	0.908	0.79196	0.60452	0.40311	0.25685	0.17005	0.11994	0.08981
6.63	0.96269	0.90812	0.79211	0.60458	0.40306	0.25676	0.16996	0.11986	0.08975
6.64	0.96276	0.90824	0.79225	0.60465	0.40301	0.25666	0.16987	0.11979	0.08968
6.65	0.96283	0.90836	0.7924	0.60471	0.40295	0.25657	0.16978	0.11971	0.08962
6.66	0.9629	0.90847	0.79254	0.60478	0.4029	0.25648	0.16969	0.11963	0.08955
6.67	0.96297	0.90859	0.79269	0.60484	0.40285	0.25638	0.1696	0.11956	0.08949
6.68	0.96303	0.90871	0.79283	0.60491	0.4028	0.25629	0.16951	0.11948	0.08942
6.69	0.9631	0.90883	0.79298	0.60497	0.40275	0.2562	0.16942	0.1194	0.08936
6.7	0.96317	0.90895	0.79312	0.60504	0.4027	0.25611	0.16933	0.11932	0.08929
6.71	0.96324	0.90907	0.79326	0.6051	0.40265	0.25601	0.16924	0.11925	0.08923
6.72	0.96331	0.90919	0.79341	0.60517	0.4026	0.25592	0.16915	0.11917	0.08916
6.73	0.96338	0.9093	0.79355	0.60523	0.40254	0.25583	0.16906	0.1191	0.0891
6.74	0.96345	0.90942	0.7937	0.60529	0.40249	0.25574	0.16897	0.11902	0.08904
6.75	0.96352	0.90954	0.79384	0.60536	0.40244	0.25564	0.16888	0.11894	0.08897
6.76	0.96359	0.90966	0.79398	0.60542	0.40239	0.25555	0.16879	0.11887	0.08891
6.77	0.96366	0.90978	0.79413	0.60549	0.40234	0.25546	0.1687	0.11879	0.08884
6.78	0.96372	0.90989	0.79427	0.60555	0.40229	0.25537	0.16861	0.11872	0.08878
6.79	0.96379	0.91001	0.79441	0.60561	0.40224	0.25528	0.16853	0.11864	0.08872
6.8	0.96386	0.91013	0.79455	0.60568	0.40219	0.25519	0.16844	0.11856	0.08865
6.81	0.96393	0.91025	0.7947	0.60574	0.40214	0.25509	0.16835	0.11849	0.08859
6.82	0.964	0.91037	0.79484	0.6058	0.40209	0.255	0.16826	0.11841	0.08853
6.83	0.96407	0.91048	0.79498	0.60587	0.40204	0.25491	0.16817	0.11834	0.08846
6.84	0.96414	0.9106	0.79512	0.60593	0.40199	0.25482	0.16809	0.11826	0.0884
6.85	0.9642	0.91072	0.79526	0.60599	0.40194	0.25473	0.168	0.11819	0.08834
6.86	0.96427	0.91083	0.79541	0.60606	0.40189	0.25464	0.16791	0.11811	0.08828
6.87	0.96434	0.91095	0.79555	0.60612	0.40184	0.25455	0.16782	0.11804	0.08821
6.88	0.96441	0.91107	0.79569	0.60618	0.40179	0.25446	0.16774	0.11796	0.08815
6.89	0.96447	0.91118	0.79583	0.60624	0.40174	0.25437	0.16765	0.11789	0.08809
6.9	0.96454	0.9113	0.79597	0.60631	0.40169	0.25428	0.16756	0.11782	0.08803
6.91	0.96461	0.91141	0.79611	0.60637	0.40164	0.25419	0.16748	0.11774	0.08796
6.92	0.96468	0.91153	0.79625	0.60643	0.40159	0.2541	0.16739	0.11767	0.0879
6.93	0.96474	0.91165	0.79639	0.60649	0.40154	0.25401	0.1673	0.11759	0.08784
6.94	0.96481	0.91176	0.79653	0.60655	0.40149	0.25392	0.16722	0.11752	0.08778
6.95	0.96488	0.91188	0.79667	0.60662	0.40144	0.25383	0.16713	0.11745	0.08772
6.96	0.96494	0.91199	0.7968	0.60668	0.4014	0.25374	0.16704	0.11737	0.08765
6.97	0.96501	0.9121	0.79694	0.60674	0.40135	0.25366	0.16696	0.1173	0.08759
6.98	0.96507	0.91222	0.79708	0.6068	0.4013	0.25357	0.16687	0.11723	0.08753
6.99	0.96514	0.91233	0.79722	0.60686	0.40125	0.25348	0.16679	0.11715	0.08747
7	0.96521	0.91245	0.79736	0.60692	0.4012	0.25339	0.1667	0.11708	0.08741
7.01	0.96527	0.91256	0.79749	0.60698	0.40115	0.2533	0.16662	0.11701	0.08735
7.02	0.96534	0.91267	0.79763	0.60704	0.4011	0.25321	0.16653	0.11693	0.08729
7.03	0.9654	0.91278	0.79777	0.6071	0.40105	0.25313	0.16645	0.11686	0.08722
7.04	0.96547	0.9129	0.7979	0.60717	0.40101	0.25304	0.16636	0.11679	0.08716
7.05	0.96553	0.91301	0.79804	0.60723	0.40096	0.25295	0.16628	0.11672	0.0871
7.06	0.96559	0.91312	0.79818	0.60729	0.40091	0.25286	0.16619	0.11664	0.08704
7.07	0.96566	0.91323	0.79831	0.60735	0.40086	0.25277	0.16611	0.11657	0.08698
7.08	0.96572	0.91334	0.79845	0.60741	0.40081	0.25269	0.16602	0.1165	0.08692
7.09	0.96579	0.91345	0.79858	0.60747	0.40076	0.2526	0.16594	0.11643	0.08686
7.1	0.96585	0.91356	0.79872	0.60753	0.40072	0.25251	0.16585	0.11636	0.0868
7.11	0.96591	0.91368	0.79885	0.60759	0.40067	0.25243	0.16577	0.11628	0.08674
7.12	0.96598	0.91379	0.79898	0.60765	0.40062	0.25234	0.16569	0.11621	0.08668
7.13	0.96604	0.9139	0.79912	0.60771	0.40057	0.25225	0.1656	0.11614	0.08662
7.14	0.9661	0.914	0.79925	0.60777	0.40053	0.25217	0.16552	0.11607	0.08656
7.15	0.96616	0.91411	0.79938	0.60783	0.40048	0.25208	0.16543	0.116	0.0865
7.16	0.96623	0.91422	0.79952	0.60788	0.40043	0.25199	0.16535	0.11593	0.08644
7.17	0.96629	0.91433	0.79965	0.60794	0.40038	0.25191	0.16527	0.11586	0.08638
7.18	0.96635	0.91444	0.79978	0.608	0.40034	0.25182	0.16518	0.11579	0.08632
7.19	0.96641	0.91455	0.79991	0.60806	0.40029	0.25173	0.1651	0.11572	0.08626
7.2	0.96647	0.91465	0.80005	0.60812	0.40024	0.25165	0.16502	0.11564	0.0862
7.21	0.96654	0.91476	0.80018	0.60818	0.40019	0.25156	0.16494	0.11557	0.08614
7.22	0.9666	0.91487	0.80031	0.60824	0.40015	0.25148	0.16485	0.1155	0.08608
7.23	0.96666	0.91498	0.80044	0.6083	0.4001	0.25139	0.16477	0.11543	0.08603
7.24	0.96672	0.91508	0.80057	0.60836	0.40005	0.25131	0.16469	0.11536	0.08597
7.25	0.96678	0.91519	0.8007	0.60841	0.40001	0.25122	0.16461	0.11529	0.08591
7.26	0.96684	0.91529	0.80083	0.60847	0.39996	0.25114	0.16452	0.11522	0.08585
7.27	0.9669	0.9154	0.80096	0.60853	0.39991	0.25105	0.16444	0.11515	0.08579
7.28	0.96696	0.9155	0.80109	0.60859	0.39987	0.25097	0.16436	0.11508	0.08573
7.29	0.96702	0.91561	0.80122	0.60865	0.39982	0.25088	0.16428	0.11501	0.08567
7.3	0.96708	0.91571	0.80134	0.6087	0.39977	0.2508	0.1642	0.11494	0.08561
7.31	0.96714	0.91582	0.80147	0.60876	0.39973	0.25071	0.16412	0.11487	0.08556
7.32	0.96719	0.91592	0.8016	0.60882	0.39968	0.25063	0.16403	0.1148	0.0855
7.33	0.96725	0.91603	0.80173	0.60888	0.39963	0.25054	0.16395	0.11473	0.08544
7.34	0.96731	0.91613	0.80185	0.60893	0.39959	0.25046	0.16387	0.11467	0.08538
7.35	0.96737	0.91623	0.80198	0.60899	0.39954	0.25038	0.16379	0.1146	0.08532
7.36	0.96743	0.91633	0.80211	0.60905	0.39949	0.25029	0.16371	0.11453	0.08527
7.37	0.96749	0.91644	0.80223	0.60911	0.39945	0.25021	0.16363	0.11446	0.08521
7.38	0.96754	0.91654	0.80236	0.60916	0.3994	0.25013	0.16355	0.11439	0.08515
7.39	0.9676	0.91664	0.80249	0.60922	0.39936	0.25004	0.16347	0.11432	0.08509
7.4	0.96766	0.91674	0.80261	0.60928	0.39931	0.24996	0.16339	0.11425	0.08504
7.41	0.96772	0.91684	0.80274	0.60933	0.39926	0.24988	0.16331	0.11418	0.08498
7.42	0.96777	0.91694	0.80286	0.60939	0.39922	0.24979	0.16323	0.11412	0.08492
7.43	0.96783	0.91704	0.80299	0.60945	0.39917	0.24971	0.16315	0.11405	0.08486
7.44	0.96789	0.91714	0.80311	0.6095	0.39913	0.24963	0.16307	0.11398	0.08481
7.45	0.96794	0.91724	0.80323	0.60956	0.39908	0.24954	0.16299	0.11391	0.08475
7.46	0.968	0.91734	0.80336	0.60961	0.39904	0.24946	0.16291	0.11384	0.08469
7.47	0.96805	0.91744	0.80348	0.60967	0.39899	0.24938	0.16283	0.11378	0.08464
7.48	0.96811	0.91754	0.8036	0.60973	0.39895	0.2493	0.16275	0.11371	0.08458
7.49	0.96816	0.91764	0.80373	0.60978	0.3989	0.24921	0.16267	0.11364	0.08452
7.5	0.96822	0.91774	0.80385	0.60984	0.39886	0.24913	0.16259	0.11357	0.08447
7.51	0.96827	0.91784	0.80397	0.60989	0.39881	0.24905	0.16251	0.11351	0.08441
7.52	0.96833	0.91793	0.80409	0.60995	0.39877	0.24897	0.16243	0.11344	0.08435
7.53	0.96838	0.91803	0.80422	0.61001	0.39872	0.24889	0.16235	0.11337	0.0843
7.54	0.96844	0.91813	0.80434	0.61006	0.39868	0.2488	0.16227	0.1133	0.08424
7.55	0.96849	0.91823	0.80446	0.61012	0.39863	0.24872	0.1622	0.11324	0.08418
7.56	0.96855	0.91832	0.80458	0.61017	0.39859	0.24864	0.16212	0.11317	0.08413
7.57	0.9686	0.91842	0.8047	0.61023	0.39854	0.24856	0.16204	0.1131	0.08407
7.58	0.96865	0.91852	0.80482	0.61028	0.3985	0.24848	0.16196	0.11304	0.08402
7.59	0.96871	0.91861	0.80494	0.61034	0.39845	0.2484	0.16188	0.11297	0.08396
7.6	0.96876	0.91871	0.80506	0.61039	0.39841	0.24832	0.1618	0.1129	0.0839
7.61	0.96881	0.9188	0.80518	0.61045	0.39836	0.24824	0.16173	0.11284	0.08385
7.62	0.96887	0.9189	0.8053	0.6105	0.39832	0.24816	0.16165	0.11277	0.08379
7.63	0.96892	0.91899	0.80542	0.61056	0.39827	0.24807	0.16157	0.1127	0.08374
7.64	0.96897	0.91909	0.80554	0.61061	0.39823	0.24799	0.16149	0.11264	0.08368
7.65	0.96902	0.91918	0.80565	0.61066	0.39818	0.24791	0.16142	0.11257	0.08363
7.66	0.96908	0.91927	0.80577	0.61072	0.39814	0.24783	0.16134	0.11251	0.08357
7.67	0.96913	0.91937	0.80589	0.61077	0.3981	0.24775	0.16126	0.11244	0.08352
7.68	0.96918	0.91946	0.80601	0.61083	0.39805	0.24767	0.16118	0.11237	0.08346
7.69	0.96923	0.91955	0.80612	0.61088	0.39801	0.24759	0.16111	0.11231	0.08341
7.7	0.96928	0.91965	0.80624	0.61094	0.39796	0.24751	0.16103	0.11224	0.08335
7.71	0.96934	0.91974	0.80636	0.61099	0.39792	0.24743	0.16095	0.11218	0.0833
7.72	0.96939	0.91983	0.80647	0.61104	0.39788	0.24735	0.16088	0.11211	0.08324
7.73	0.96944	0.91992	0.80659	0.6111	0.39783	0.24727	0.1608	0.11205	0.08319
7.74	0.96949	0.92001	0.80671	0.61115	0.39779	0.24719	0.16072	0.11198	0.08313
7.75	0.96954	0.92011	0.80682	0.6112	0.39775	0.24712	0.16065	0.11192	0.08308
7.76	0.96959	0.9202	0.80694	0.61126	0.3977	0.24704	0.16057	0.11185	0.08302
7.77	0.96964	0.92029	0.80705	0.61131	0.39766	0.24696	0.16049	0.11179	0.08297
7.78	0.96969	0.92038	0.80717	0.61136	0.39761	0.24688	0.16042	0.11172	0.08292
7.79	0.96974	0.92047	0.80728	0.61142	0.39757	0.2468	0.16034	0.11166	0.08286
7.8	0.96979	0.92056	0.8074	0.61147	0.39753	0.24672	0.16027	0.11159	0.08281
7.81	0.96984	0.92065	0.80751	0.61152	0.39748	0.24664	0.16019	0.11153	0.08275
7.82	0.96989	0.92074	0.80763	0.61158	0.39744	0.24656	0.16011	0.11146	0.0827
7.83	0.96994	0.92083	0.80774	0.61163	0.3974	0.24648	0.16004	0.1114	0.08265
7.84	0.96999	0.92092	0.80785	0.61168	0.39735	0.24641	0.15996	0.11134	0.08259
7.85	0.97003	0.92101	0.80797	0.61173	0.39731	0.24633	0.15989	0.11127	0.08254
7.86	0.97008	0.92109	0.80808	0.61179	0.39727	0.24625	0.15981	0.11121	0.08249
7.87	0.97013	0.92118	0.80819	0.61184	0.39723	0.24617	0.15974	0.11114	0.08243
7.88	0.97018	0.92127	0.8083	0.61189	0.39718	0.24609	0.15966	0.11108	0.08238
7.89	0.97023	0.92136	0.80842	0.61194	0.39714	0.24602	0.15959	0.11102	0.08232
7.9	0.97028	0.92145	0.80853	0.612	0.3971	0.24594	0.15951	0.11095	0.08227
7.91	0.97032	0.92153	0.80864	0.61205	0.39705	0.24586	0.15944	0.11089	0.08222
7.92	0.97037	0.92162	0.80875	0.6121	0.39701	0.24578	0.15936	0.11083	0.08217
7.93	0.97042	0.92171	0.80886	0.61215	0.39697	0.24571	0.15929	0.11076	0.08211
7.94	0.97047	0.92179	0.80897	0.61221	0.39693	0.24563	0.15921	0.1107	0.08206
7.95	0.97051	0.92188	0.80908	0.61226	0.39688	0.24555	0.15914	0.11064	0.08201
7.96	0.97056	0.92197	0.80919	0.61231	0.39684	0.24547	0.15907	0.11057	0.08195
7.97	0.97061	0.92205	0.8093	0.61236	0.3968	0.2454	0.15899	0.11051	0.0819
7.98	0.97066	0.92214	0.80941	0.61241	0.39676	0.24532	0.15892	0.11045	0.08185
7.99	0.9707	0.92222	0.80952	0.61246	0.39671	0.24524	0.15884	0.11038	0.0818
8	0.97075	0.92231	0.80963	0.61252	0.39667	0.24517	0.15877	0.11032	0.08174
8.01	0.97079	0.92239	0.80974	0.61257	0.39663	0.24509	0.1587	0.11026	0.08169
8.02	0.97084	0.92248	0.80985	0.61262	0.39659	0.24501	0.15862	0.1102	0.08164
8.03	0.97089	0.92256	0.80996	0.61267	0.39655	0.24494	0.15855	0.11013	0.08159
8.04	0.97093	0.92265	0.81007	0.61272	0.3965	0.24486	0.15848	0.11007	0.08153
8.05	0.97098	0.92273	0.81018	0.61277	0.39646	0.24478	0.1584	0.11001	0.08148
8.06	0.97102	0.92281	0.81029	0.61282	0.39642	0.24471	0.15833	0.10995	0.08143
8.07	0.97107	0.9229	0.81039	0.61287	0.39638	0.24463	0.15826	0.10989	0.08138
8.08	0.97112	0.92298	0.8105	0.61292	0.39634	0.24456	0.15818	0.10982	0.08133
8.09	0.97116	0.92306	0.81061	0.61298	0.39629	0.24448	0.15811	0.10976	0.08127
8.1	0.97121	0.92315	0.81072	0.61303	0.39625	0.2444	0.15804	0.1097	0.08122
8.11	0.97125	0.92323	0.81082	0.61308	0.39621	0.24433	0.15797	0.10964	0.08117
8.12	0.97129	0.92331	0.81093	0.61313	0.39617	0.24425	0.15789	0.10958	0.08112
8.13	0.97134	0.92339	0.81104	0.61318	0.39613	0.24418	0.15782	0.10951	0.08107
8.14	0.97138	0.92348	0.81114	0.61323	0.39609	0.2441	0.15775	0.10945	0.08102
8.15	0.97143	0.92356	0.81125	0.61328	0.39604	0.24403	0.15768	0.10939	0.08096
8.16	0.97147	0.92364	0.81136	0.61333	0.396	0.24395	0.1576	0.10933	0.08091
8.17	0.97152	0.92372	0.81146	0.61338	0.39596	0.24388	0.15753	0.10927	0.08086
8.18	0.97156	0.9238	0.81157	0.61343	0.39592	0.2438	0.15746	0.10921	0.08081
8.19	0.9716	0.92388	0.81167	0.61348	0.39588	0.24373	0.15739	0.10915	0.08076
8.2	0.97165	0.92396	0.81178	0.61353	0.39584	0.24365	0.15732	0.10909	0.08071
8.21	0.97169	0.92404	0.81188	0.61358	0.3958	0.24358	0.15724	0.10902	0.08066
8.22	0.97173	0.92412	0.81199	0.61363	0.39576	0.2435	0.15717	0.10896	0.08061
8.23	0.97178	0.9242	0.81209	0.61368	0.39571	0.24343	0.1571	0.1089	0.08056
8.24	0.97182	0.92428	0.8122	0.61373	0.39567	0.24335	0.15703	0.10884	0.08051
8.25	0.97186	0.92436	0.8123	0.61378	0.39563	0.24328	0.15696	0.10878	0.08046
8.26	0.97191	0.92444	0.8124	0.61383	0.39559	0.24321	0.15689	0.10872	0.0804
8.27	0.97195	0.92452	0.81251	0.61388	0.39555	0.24313	0.15682	0.10866	0.08035
8.28	0.97199	0.9246	0.81261	0.61393	0.39551	0.24306	0.15675	0.1086	0.0803
8.29	0.97203	0.92468	0.81271	0.61398	0.39547	0.24298	0.15667	0.10854	0.08025
8.3	0.97208	0.92476	0.81282	0.61403	0.39543	0.24291	0.1566	0.10848	0.0802
8.31	0.97212	0.92484	0.81292	0.61407	0.39539	0.24284	0.15653	0.10842	0.08015
8.32	0.97216	0.92492	0.81302	0.61412	0.39535	0.24276	0.15646	0.10836	0.0801
8.33	0.9722	0.92499	0.81312	0.61417	0.39531	0.24269	0.15639	0.1083	0.08005
8.34	0.97224	0.92507	0.81323	0.61422	0.39527	0.24262	0.15632	0.10824	0.08
8.35	0.97229	0.92515	0.81333	0.61427	0.39523	0.24254	0.15625	0.10818	0.07995
8.36	0.97233	0.92523	0.81343	0.61432	0.39518	0.24247	0.15618	0.10812	0.0799
8.37	0.97237	0.9253	0.81353	0.61437	0.39514	0.2424	0.15611	0.10806	0.07985
8.38	0.97241	0.92538	0.81363	0.61442	0.3951	0.24232	0.15604	0.108	0.0798
8.39	0.97245	0.92546	0.81373	0.61447	0.39506	0.24225	0.15597	0.10794	0.07975
8.4	0.97249	0.92553	0.81384	0.61451	0.39502	0.24218	0.1559	0.10788	0.0797
8.41	0.97253	0.92561	0.81394	0.61456	0.39498	0.2421	0.15583	0.10782	0.07965
8.42	0.97257	0.92569	0.81404	0.61461	0.39494	0.24203	0.15576	0.10777	0.07961
8.43	0.97261	0.92576	0.81414	0.61466	0.3949	0.24196	0.15569	0.10771	0.07956
8.44	0.97265	0.92584	0.81424	0.61471	0.39486	0.24189	0.15562	0.10765	0.07951
8.45	0.97269	0.92591	0.81434	0.61476	0.39482	0.24181	0.15555	0.10759	0.07946
8.46	0.97274	0.92599	0.81444	0.6148	0.39478	0.24174	0.15548	0.10753	0.07941
8.47	0.97278	0.92607	0.81454	0.61485	0.39474	0.24167	0.15541	0.10747	0.07936
8.48	0.97282	0.92614	0.81464	0.6149	0.3947	0.2416	0.15534	0.10741	0.07931
8.49	0.97286	0.92622	0.81474	0.61495	0.39466	0.24153	0.15528	0.10735	0.07926
8.5	0.97289	0.92629	0.81484	0.615	0.39462	0.24145	0.15521	0.10729	0.07921
8.51	0.97293	0.92636	0.81493	0.61504	0.39458	0.24138	0.15514	0.10724	0.07916
8.52	0.97297	0.92644	0.81503	0.61509	0.39454	0.24131	0.15507	0.10718	0.07911
8.53	0.97301	0.92651	0.81513	0.61514	0.3945	0.24124	0.155	0.10712	0.07907
8.54	0.97305	0.92659	0.81523	0.61519	0.39447	0.24117	0.15493	0.10706	0.07902
8.55	0.97309	0.92666	0.81533	0.61523	0.39443	0.24109	0.15486	0.107	0.07897
8.56	0.97313	0.92673	0.81543	0.61528	0.39439	0.24102	0.15479	0.10695	0.07892
8.57	0.97317	0.92681	0.81552	0.61533	0.39435	0.24095	0.15473	0.10689	0.07887
8.58	0.97321	0.92688	0.81562	0.61538	0.39431	0.24088	0.15466	0.10683	0.07882
8.59	0.97325	0.92695	0.81572	0.61542	0.39427	0.24081	0.15459	0.10677	0.07878
8.6	0.97329	0.92703	0.81582	0.61547	0.39423	0.24074	0.15452	0.10671	0.07873
8.61	0.97333	0.9271	0.81591	0.61552	0.39419	0.24067	0.15445	0.10666	0.07868
8.62	0.97336	0.92717	0.81601	0.61557	0.39415	0.2406	0.15438	0.1066	0.07863
8.63	0.9734	0.92725	0.81611	0.61561	0.39411	0.24053	0.15432	0.10654	0.07858
8.64	0.97344	0.92732	0.8162	0.61566	0.39407	0.24045	0.15425	0.10648	0.07853
8.65	0.97348	0.92739	0.8163	0.61571	0.39403	0.24038	0.15418	0.10643	0.07849
8.66	0.97352	0.92746	0.8164	0.61575	0.39399	0.24031	0.15411	0.10637	0.07844
8.67	0.97355	0.92753	0.81649	0.6158	0.39395	0.24024	0.15405	0.10631	0.07839
8.68	0.97359	0.92761	0.81659	0.61585	0.39392	0.24017	0.15398	0.10625	0.07834
8.69	0.97363	0.92768	0.81668	0.61589	0.39388	0.2401	0.15391	0.1062	0.0783
8.7	0.97367	0.92775	0.81678	0.61594	0.39384	0.24003	0.15384	0.10614	0.07825
8.71	0.9737	0.92782	0.81687	0.61599	0.3938	0.23996	0.15378	0.10608	0.0782
8.72	0.97374	0.92789	0.81697	0.61603	0.39376	0.23989	0.15371	0.10603	0.07815
8.73	0.97378	0.92796	0.81706	0.61608	0.39372	0.23982	0.15364	0.10597	0.07811
8.74	0.97382	0.92803	0.81716	0.61613	0.39368	0.23975	0.15358	0.10591	0.07806
8.75	0.97385	0.9281	0.81725	0.61617	0.39364	0.23968	0.15351	0.10586	0.07801
8.76	0.97389	0.92817	0.81735	0.61622	0.39361	0.23961	0.15344	0.1058	0.07796
8.77	0.97393	0.92824	0.81744	0.61627	0.39357	0.23954	0.15338	0.10574	0.07792
8.78	0.97396	0.92831	0.81754	0.61631	0.39353	0.23947	0.15331	0.10569	0.07787
8.79	0.974	0.92838	0.81763	0.61636	0.39349	0.2394	0.15324	0.10563	0.07782
8.8	0.97404	0.92845	0.81772	0.6164	0.39345	0.23933	0.15318	0.10557	0.07778
8.81	0.97407	0.92852	0.81782	0.61645	0.39341	0.23926	0.15311	0.10552	0.07773
8.82	0.97411	0.92859	0.81791	0.6165	0.39338	0.23919	0.15304	0.10546	0.07768
8.83	0.97415	0.92866	0.818	0.61654	0.39334	0.23912	0.15298	0.10541	0.07764
8.84	0.97418	0.92873	0.8181	0.61659	0.3933	0.23906	0.15291	0.10535	0.07759
8.85	0.97422	0.9288	0.81819	0.61663	0.39326	0.23899	0.15285	0.10529	0.07754
8.86	0.97425	0.92886	0.81828	0.61668	0.39322	0.23892	0.15278	0.10524	0.0775
8.87	0.97429	0.92893	0.81838	0.61673	0.39318	0.23885	0.15271	0.10518	0.07745
8.88	0.97432	0.929	0.81847	0.61677	0.39315	0.23878	0.15265	0.10513	0.0774
8.89	0.97436	0.92907	0.81856	0.61682	0.39311	0.23871	0.15258	0.10507	0.07736
8.9	0.9744	0.92914	0.81865	0.61686	0.39307	0.23864	0.15252	0.10502	0.07731
8.91	0.97443	0.92921	0.81875	0.61691	0.39303	0.23857	0.15245	0.10496	0.07726
8.92	0.97447	0.92927	0.81884	0.61695	0.39299	0.23851	0.15239	0.10491	0.07722
8.93	0.9745	0.92934	0.81893	0.617	0.39296	0.23844	0.15232	0.10485	0.07717
8.94	0.97454	0.92941	0.81902	0.61704	0.39292	0.23837	0.15225	0.10479	0.07713
8.95	0.97457	0.92948	0.81911	0.61709	0.39288	0.2383	0.15219	0.10474	0.07708
8.96	0.97461	0.92954	0.8192	0.61713	0.39284	0.23823	0.15212	0.10468	0.07703
8.97	0.97464	0.92961	0.81929	0.61718	0.39281	0.23816	0.15206	0.10463	0.07699
8.98	0.97468	0.92968	0.81938	0.61722	0.39277	0.2381	0.15199	0.10457	0.07694
8.99	0.97471	0.92974	0.81948	0.61727	0.39273	0.23803	0.15193	0.10452	0.0769
9	0.97475	0.92981	0.81957	0.61731	0.39269	0.23796	0.15186	0.10446	0.07685
9.01	0.97478	0.92988	0.81966	0.61736	0.39266	0.23789	0.1518	0.10441	0.0768
9.02	0.97481	0.92994	0.81975	0.6174	0.39262	0.23782	0.15174	0.10436	0.07676
9.03	0.97485	0.93001	0.81984	0.61745	0.39258	0.23776	0.15167	0.1043	0.07671
9.04	0.97488	0.93007	0.81993	0.61749	0.39254	0.23769	0.15161	0.10425	0.07667
9.05	0.97492	0.93014	0.82002	0.61754	0.39251	0.23762	0.15154	0.10419	0.07662
9.06	0.97495	0.9302	0.82011	0.61758	0.39247	0.23755	0.15148	0.10414	0.07658
9.07	0.97499	0.93027	0.8202	0.61763	0.39243	0.23749	0.15141	0.10408	0.07653
9.08	0.97502	0.93034	0.82028	0.61767	0.39239	0.23742	0.15135	0.10403	0.07649
9.09	0.97505	0.9304	0.82037	0.61772	0.39236	0.23735	0.15129	0.10397	0.07644
9.1	0.97509	0.93047	0.82046	0.61776	0.39232	0.23729	0.15122	0.10392	0.0764
9.11	0.97512	0.93053	0.82055	0.6178	0.39228	0.23722	0.15116	0.10387	0.07635
9.12	0.97515	0.9306	0.82064	0.61785	0.39224	0.23715	0.15109	0.10381	0.07631
9.13	0.97519	0.93066	0.82073	0.61789	0.39221	0.23708	0.15103	0.10376	0.07626
9.14	0.97522	0.93072	0.82082	0.61794	0.39217	0.23702	0.15097	0.1037	0.07622
9.15	0.97525	0.93079	0.82091	0.61798	0.39213	0.23695	0.1509	0.10365	0.07617
9.16	0.97529	0.93085	0.82099	0.61802	0.3921	0.23688	0.15084	0.1036	0.07613
9.17	0.97532	0.93092	0.82108	0.61807	0.39206	0.23682	0.15078	0.10354	0.07608
9.18	0.97535	0.93098	0.82117	0.61811	0.39202	0.23675	0.15071	0.10349	0.07604
9.19	0.97539	0.93104	0.82126	0.61816	0.39199	0.23668	0.15065	0.10344	0.07599
9.2	0.97542	0.93111	0.82135	0.6182	0.39195	0.23662	0.15059	0.10338	0.07595
9.21	0.97545	0.93117	0.82143	0.61824	0.39191	0.23655	0.15052	0.10333	0.0759
9.22	0.97548	0.93123	0.82152	0.61829	0.39188	0.23649	0.15046	0.10328	0.07586
9.23	0.97552	0.9313	0.82161	0.61833	0.39184	0.23642	0.1504	0.10322	0.07582
9.24	0.97555	0.93136	0.82169	0.61838	0.3918	0.23635	0.15033	0.10317	0.07577
9.25	0.97558	0.93142	0.82178	0.61842	0.39177	0.23629	0.15027	0.10312	0.07573
9.26	0.97561	0.93149	0.82187	0.61846	0.39173	0.23622	0.15021	0.10306	0.07568
9.27	0.97564	0.93155	0.82195	0.61851	0.39169	0.23616	0.15014	0.10301	0.07564
9.28	0.97568	0.93161	0.82204	0.61855	0.39166	0.23609	0.15008	0.10296	0.07559
9.29	0.97571	0.93167	0.82213	0.61859	0.39162	0.23602	0.15002	0.1029	0.07555
9.3	0.97574	0.93174	0.82221	0.61864	0.39158	0.23596	0.14996	0.10285	0.07551
9.31	0.97577	0.9318	0.8223	0.61868	0.39155	0.23589	0.14989	0.1028	0.07546
9.32	0.9758	0.93186	0.82238	0.61872	0.39151	0.23583	0.14983	0.10275	0.07542
9.33	0.97584	0.93192	0.82247	0.61877	0.39147	0.23576	0.14977	0.10269	0.07537
9.34	0.97587	0.93198	0.82256	0.61881	0.39144	0.2357	0.14971	0.10264	0.07533
9.35	0.9759	0.93205	0.82264	0.61885	0.3914	0.23563	0.14964	0.10259	0.07529
9.36	0.97593	0.93211	0.82273	0.61889	0.39137	0.23557	0.14958	0.10254	0.07524
9.37	0.97596	0.93217	0.82281	0.61894	0.39133	0.2355	0.14952	0.10248	0.0752
9.38	0.97599	0.93223	0.8229	0.61898	0.39129	0.23544	0.14946	0.10243	0.07516
9.39	0.97602	0.93229	0.82298	0.61902	0.39126	0.23537	0.1494	0.10238	0.07511
9.4	0.97606	0.93235	0.82307	0.61907	0.39122	0.23531	0.14934	0.10233	0.07507
9.41	0.97609	0.93241	0.82315	0.61911	0.39119	0.23524	0.14927	0.10228	0.07503
9.42	0.97612	0.93247	0.82324	0.61915	0.39115	0.23518	0.14921	0.10222	0.07498
9.43	0.97615	0.93253	0.82332	0.61919	0.39111	0.23511	0.14915	0.10217	0.07494
9.44	0.97618	0.93259	0.8234	0.61924	0.39108	0.23505	0.14909	0.10212	0.0749
9.45	0.97621	0.93265	0.82349	0.61928	0.39104	0.23498	0.14903	0.10207	0.07485
9.46	0.97624	0.93271	0.82357	0.61932	0.39101	0.23492	0.14897	0.10202	0.07481
9.47	0.97627	0.93277	0.82366	0.61936	0.39097	0.23485	0.1489	0.10196	0.07477
9.48	0.9763	0.93283	0.82374	0.61941	0.39093	0.23479	0.14884	0.10191	0.07472
9.49	0.97633	0.93289	0.82382	0.61945	0.3909	0.23472	0.14878	0.10186	0.07468
9.5	0.97636	0.93295	0.82391	0.61949	0.39086	0.23466	0.14872	0.10181	0.07464
9.51	0.97639	0.93301	0.82399	0.61953	0.39083	0.2346	0.14866	0.10176	0.0746
9.52	0.97642	0.93307	0.82407	0.61958	0.39079	0.23453	0.1486	0.10171	0.07455
9.53	0.97645	0.93313	0.82416	0.61962	0.39076	0.23447	0.14854	0.10165	0.07451
9.54	0.97648	0.93319	0.82424	0.61966	0.39072	0.2344	0.14848	0.1016	0.07447
9.55	0.97651	0.93325	0.82432	0.6197	0.39069	0.23434	0.14842	0.10155	0.07443
9.56	0.97654	0.93331	0.8244	0.61974	0.39065	0.23428	0.14836	0.1015	0.07438
9.57	0.97657	0.93337	0.82449	0.61979	0.39061	0.23421	0.1483	0.10145	0.07434
9.58	0.9766	0.93343	0.82457	0.61983	0.39058	0.23415	0.14823	0.1014	0.0743
9.59	0.97663	0.93348	0.82465	0.61987	0.39054	0.23408	0.14817	0.10135	0.07426
9.6	0.97666	0.93354	0.82473	0.61991	0.39051	0.23402	0.14811	0.1013	0.07421
9.61	0.97669	0.9336	0.82482	0.61995	0.39047	0.23396	0.14805	0.10125	0.07417
9.62	0.97672	0.93366	0.8249	0.62	0.39044	0.23389	0.14799	0.1012	0.07413
9.63	0.97675	0.93372	0.82498	0.62004	0.3904	0.23383	0.14793	0.10114	0.07409
9.64	0.97678	0.93378	0.82506	0.62008	0.39037	0.23377	0.14787	0.10109	0.07404
9.65	0.97681	0.93383	0.82514	0.62012	0.39033	0.2337	0.14781	0.10104	0.074
9.66	0.97684	0.93389	0.82522	0.62016	0.3903	0.23364	0.14775	0.10099	0.07396
9.67	0.97687	0.93395	0.82531	0.6202	0.39026	0.23358	0.14769	0.10094	0.07392
9.68	0.9769	0.93401	0.82539	0.62025	0.39023	0.23352	0.14763	0.10089	0.07388
9.69	0.97693	0.93406	0.82547	0.62029	0.39019	0.23345	0.14757	0.10084	0.07383
9.7	0.97695	0.93412	0.82555	0.62033	0.39016	0.23339	0.14751	0.10079	0.07379
9.71	0.97698	0.93418	0.82563	0.62037	0.39012	0.23333	0.14745	0.10074	0.07375
9.72	0.97701	0.93424	0.82571	0.62041	0.39009	0.23326	0.14739	0.10069	0.07371
9.73	0.97704	0.93429	0.82579	0.62045	0.39005	0.2332	0.14734	0.10064	0.07367
9.74	0.97707	0.93435	0.82587	0.62049	0.39002	0.23314	0.14728	0.10059	0.07363
9.75	0.9771	0.93441	0.82595	0.62053	0.38998	0.23308	0.14722	0.10054	0.07358
9.76	0.97713	0.93446	0.82603	0.62058	0.38995	0.23301	0.14716	0.10049	0.07354
9.77	0.97716	0.93452	0.82611	0.62062	0.38991	0.23295	0.1471	0.10044	0.0735
9.78	0.97718	0.93458	0.82619	0.62066	0.38988	0.23289	0.14704	0.10039	0.07346
9.79	0.97721	0.93463	0.82627	0.6207	0.38984	0.23283	0.14698	0.10034	0.07342
9.8	0.97724	0.93469	0.82635	0.62074	0.38981	0.23276	0.14692	0.10029	0.07338
9.81	0.97727	0.93474	0.82643	0.62078	0.38977	0.2327	0.14686	0.10024	0.07334
9.82	0.9773	0.9348	0.82651	0.62082	0.38974	0.23264	0.1468	0.10019	0.07329
9.83	0.97732	0.93486	0.82659	0.62086	0.38971	0.23258	0.14674	0.10014	0.07325
9.84	0.97735	0.93491	0.82667	0.6209	0.38967	0.23252	0.14668	0.10009	0.07321
9.85	0.97738	0.93497	0.82675	0.62094	0.38964	0.23245	0.14663	0.10004	0.07317
9.86	0.97741	0.93502	0.82683	0.62098	0.3896	0.23239	0.14657	0.09999	0.07313
9.87	0.97744	0.93508	0.8269	0.62103	0.38957	0.23233	0.14651	0.09995	0.07309
9.88	0.97746	0.93513	0.82698	0.62107	0.38953	0.23227	0.14645	0.0999	0.07305
9.89	0.97749	0.93519	0.82706	0.62111	0.3895	0.23221	0.14639	0.09985	0.07301
9.9	0.97752	0.93524	0.82714	0.62115	0.38946	0.23214	0.14633	0.0998	0.07297
9.91	0.97755	0.9353	0.82722	0.62119	0.38943	0.23208	0.14628	0.09975	0.07293
9.92	0.97757	0.93535	0.8273	0.62123	0.3894	0.23202	0.14622	0.0997	0.07288
9.93	0.9776	0.93541	0.82737	0.62127	0.38936	0.23196	0.14616	0.09965	0.07284
9.94	0.97763	0.93546	0.82745	0.62131	0.38933	0.2319	0.1461	0.0996	0.0728
9.95	0.97766	0.93552	0.82753	0.62135	0.38929	0.23184	0.14604	0.09955	0.07276
9.96	0.97768	0.93557	0.82761	0.62139	0.38926	0.23178	0.14598	0.0995	0.07272
9.97	0.97771	0.93563	0.82769	0.62143	0.38923	0.23172	0.14593	0.09946	0.07268
9.98	0.97774	0.93568	0.82776	0.62147	0.38919	0.23165	0.14587	0.09941	0.07264
9.99	0.97776	0.93573	0.82784	0.62151	0.38916	0.23159	0.14581	0.09936	0.0726
10	0.97779	0.93579	0.82792	0.62155	0.38912	0.23153	0.14575	0.09931	0.07256
10.01	0.97782	0.93584	0.828	0.62159	0.38909	0.23147	0.1457	0.09926	0.07252
10.02	0.97784	0.9359	0.82807	0.62163	0.38906	0.23141	0.14564	0.09921	0.07248
10.03	0.97787	0.93595	0.82815	0.62167	0.38902	0.23135	0.14558	0.09916	0.07244
10.04	0.9779	0.936	0.82823	0.62171	0.38899	0.23129	0.14552	0.09912	0.0724
10.05	0.97792	0.93606	0.8283	0.62175	0.38895	0.23123	0.14547	0.09907	0.07236
10.06	0.97795	0.93611	0.82838	0.62179	0.38892	0.23117	0.14541	0.09902	0.07232
10.07	0.97798	0.93616	0.82846	0.62183	0.38889	0.23111	0.14535	0.09897	0.07228
10.08	0.978	0.93622	0.82853	0.62187	0.38885	0.23105	0.14529	0.09892	0.07224
10.09	0.97803	0.93627	0.82861	0.62191	0.38882	0.23099	0.14524	0.09887	0.0722
10.1	0.97806	0.93632	0.82869	0.62195	0.38878	0.23093	0.14518	0.09883	0.07216
10.11	0.97808	0.93638	0.82876	0.62199	0.38875	0.23086	0.14512	0.09878	0.07212
10.12	0.97811	0.93643	0.82884	0.62203	0.38872	0.2308	0.14506	0.09873	0.07208
10.13	0.97814	0.93648	0.82891	0.62207	0.38868	0.23074	0.14501	0.09868	0.07204
10.14	0.97816	0.93653	0.82899	0.62211	0.38865	0.23068	0.14495	0.09864	0.072
10.15	0.97819	0.93659	0.82907	0.62215	0.38862	0.23062	0.14489	0.09859	0.07196
10.16	0.97821	0.93664	0.82914	0.62219	0.38858	0.23056	0.14484	0.09854	0.07192
10.17	0.97824	0.93669	0.82922	0.62222	0.38855	0.2305	0.14478	0.09849	0.07188
10.18	0.97826	0.93674	0.82929	0.62226	0.38852	0.23044	0.14472	0.09844	0.07184
10.19	0.97829	0.9368	0.82937	0.6223	0.38848	0.23038	0.14467	0.0984	0.0718
10.2	0.97832	0.93685	0.82944	0.62234	0.38845	0.23032	0.14461	0.09835	0.07176
10.21	0.97834	0.9369	0.82952	0.62238	0.38842	0.23026	0.14455	0.0983	0.07172
10.22	0.97837	0.93695	0.82959	0.62242	0.38838	0.2302	0.1445	0.09825	0.07169
10.23	0.97839	0.937	0.82967	0.62246	0.38835	0.23015	0.14444	0.09821	0.07165
10.24	0.97842	0.93706	0.82974	0.6225	0.38832	0.23009	0.14439	0.09816	0.07161
10.25	0.97844	0.93711	0.82982	0.62254	0.38828	0.23003	0.14433	0.09811	0.07157
10.26	0.97847	0.93716	0.82989	0.62258	0.38825	0.22997	0.14427	0.09807	0.07153
10.27	0.97849	0.93721	0.82996	0.62262	0.38822	0.22991	0.14422	0.09802	0.07149
10.28	0.97852	0.93726	0.83004	0.62266	0.38818	0.22985	0.14416	0.09797	0.07145
10.29	0.97855	0.93731	0.83011	0.62269	0.38815	0.22979	0.1441	0.09792	0.07141
10.3	0.97857	0.93736	0.83019	0.62273	0.38812	0.22973	0.14405	0.09788	0.07137
10.31	0.9786	0.93741	0.83026	0.62277	0.38808	0.22967	0.14399	0.09783	0.07133
10.32	0.97862	0.93746	0.83034	0.62281	0.38805	0.22961	0.14394	0.09778	0.07129
10.33	0.97865	0.93752	0.83041	0.62285	0.38802	0.22955	0.14388	0.09774	0.07126
10.34	0.97867	0.93757	0.83048	0.62289	0.38799	0.22949	0.14383	0.09769	0.07122
10.35	0.9787	0.93762	0.83056	0.62293	0.38795	0.22943	0.14377	0.09764	0.07118
10.36	0.97872	0.93767	0.83063	0.62297	0.38792	0.22938	0.14371	0.0976	0.07114
10.37	0.97875	0.93772	0.8307	0.623	0.38789	0.22932	0.14366	0.09755	0.0711
10.38	0.97877	0.93777	0.83078	0.62304	0.38785	0.22926	0.1436	0.0975	0.07106
10.39	0.97879	0.93782	0.83085	0.62308	0.38782	0.2292	0.14355	0.09746	0.07102
10.4	0.97882	0.93787	0.83092	0.62312	0.38779	0.22914	0.14349	0.09741	0.07099
10.41	0.97884	0.93792	0.831	0.62316	0.38776	0.22908	0.14344	0.09736	0.07095
10.42	0.97887	0.93797	0.83107	0.6232	0.38772	0.22902	0.14338	0.09732	0.07091
10.43	0.97889	0.93802	0.83114	0.62324	0.38769	0.22896	0.14333	0.09727	0.07087
10.44	0.97892	0.93807	0.83121	0.62327	0.38766	0.22891	0.14327	0.09723	0.07083
10.45	0.97894	0.93812	0.83129	0.62331	0.38762	0.22885	0.14322	0.09718	0.07079
10.46	0.97897	0.93817	0.83136	0.62335	0.38759	0.22879	0.14316	0.09713	0.07076
10.47	0.97899	0.93822	0.83143	0.62339	0.38756	0.22873	0.14311	0.09709	0.07072
10.48	0.97901	0.93827	0.8315	0.62343	0.38753	0.22867	0.14305	0.09704	0.07068
10.49	0.97904	0.93832	0.83158	0.62346	0.38749	0.22861	0.143	0.097	0.07064
10.5	0.97906	0.93837	0.83165	0.6235	0.38746	0.22856	0.14294	0.09695	0.0706
10.51	0.97909	0.93841	0.83172	0.62354	0.38743	0.2285	0.14289	0.0969	0.07057
10.52	0.97911	0.93846	0.83179	0.62358	0.3874	0.22844	0.14283	0.09686	0.07053
10.53	0.97913	0.93851	0.83186	0.62362	0.38736	0.22838	0.14278	0.09681	0.07049
10.54	0.97916	0.93856	0.83194	0.62365	0.38733	0.22832	0.14272	0.09677	0.07045
10.55	0.97918	0.93861	0.83201	0.62369	0.3873	0.22827	0.14267	0.09672	0.07041
10.56	0.97921	0.93866	0.83208	0.62373	0.38727	0.22821	0.14261	0.09668	0.07038
10.57	0.97923	0.93871	0.83215	0.62377	0.38724	0.22815	0.14256	0.09663	0.07034
10.58	0.97925	0.93876	0.83222	0.62381	0.3872	0.22809	0.14251	0.09658	0.0703
10.59	0.97928	0.9388	0.83229	0.62384	0.38717	0.22804	0.14245	0.09654	0.07026
10.6	0.9793	0.93885	0.83236	0.62388	0.38714	0.22798	0.1424	0.09649	0.07023
10.61	0.97932	0.9389	0.83243	0.62392	0.38711	0.22792	0.14234	0.09645	0.07019
10.62	0.97935	0.93895	0.83251	0.62396	0.38707	0.22786	0.14229	0.0964	0.07015
10.63	0.97937	0.939	0.83258	0.62399	0.38704	0.22781	0.14224	0.09636	0.07011
10.64	0.97939	0.93905	0.83265	0.62403	0.38701	0.22775	0.14218	0.09631	0.07008
10.65	0.97942	0.93909	0.83272	0.62407	0.38698	0.22769	0.14213	0.09627	0.07004
10.66	0.97944	0.93914	0.83279	0.62411	0.38695	0.22763	0.14207	0.09622	0.07
10.67	0.97946	0.93919	0.83286	0.62415	0.38691	0.22758	0.14202	0.09618	0.06996
10.68	0.97949	0.93924	0.83293	0.62418	0.38688	0.22752	0.14197	0.09613	0.06993
10.69	0.97951	0.93928	0.833	0.62422	0.38685	0.22746	0.14191	0.09609	0.06989
10.7	0.97953	0.93933	0.83307	0.62426	0.38682	0.22741	0.14186	0.09604	0.06985
10.71	0.97956	0.93938	0.83314	0.62429	0.38679	0.22735	0.1418	0.096	0.06981
10.72	0.97958	0.93943	0.83321	0.62433	0.38675	0.22729	0.14175	0.09595	0.06978
10.73	0.9796	0.93947	0.83328	0.62437	0.38672	0.22724	0.1417	0.09591	0.06974
10.74	0.97963	0.93952	0.83335	0.62441	0.38669	0.22718	0.14164	0.09586	0.0697
10.75	0.97965	0.93957	0.83342	0.62444	0.38666	0.22712	0.14159	0.09582	0.06967
10.76	0.97967	0.93962	0.83349	0.62448	0.38663	0.22706	0.14154	0.09577	0.06963
10.77	0.97969	0.93966	0.83356	0.62452	0.38659	0.22701	0.14148	0.09573	0.06959
10.78	0.97972	0.93971	0.83363	0.62456	0.38656	0.22695	0.14143	0.09568	0.06956
10.79	0.97974	0.93976	0.8337	0.62459	0.38653	0.2269	0.14138	0.09564	0.06952
10.8	0.97976	0.9398	0.83377	0.62463	0.3865	0.22684	0.14132	0.09559	0.06948
10.81	0.97978	0.93985	0.83384	0.62467	0.38647	0.22678	0.14127	0.09555	0.06944
10.82	0.97981	0.9399	0.8339	0.6247	0.38644	0.22673	0.14122	0.09551	0.06941
10.83	0.97983	0.93994	0.83397	0.62474	0.3864	0.22667	0.14117	0.09546	0.06937
10.84	0.97985	0.93999	0.83404	0.62478	0.38637	0.22661	0.14111	0.09542	0.06933
10.85	0.97987	0.94004	0.83411	0.62481	0.38634	0.22656	0.14106	0.09537	0.0693
10.86	0.9799	0.94008	0.83418	0.62485	0.38631	0.2265	0.14101	0.09533	0.06926
10.87	0.97992	0.94013	0.83425	0.62489	0.38628	0.22644	0.14095	0.09528	0.06923
10.88	0.97994	0.94017	0.83432	0.62492	0.38625	0.22639	0.1409	0.09524	0.06919
10.89	0.97996	0.94022	0.83439	0.62496	0.38622	0.22633	0.14085	0.0952	0.06915
10.9	0.97999	0.94027	0.83445	0.625	0.38618	0.22628	0.1408	0.09515	0.06912
10.91	0.98001	0.94031	0.83452	0.62503	0.38615	0.22622	0.14074	0.09511	0.06908
10.92	0.98003	0.94036	0.83459	0.62507	0.38612	0.22616	0.14069	0.09506	0.06904
10.93	0.98005	0.9404	0.83466	0.62511	0.38609	0.22611	0.14064	0.09502	0.06901
10.94	0.98007	0.94045	0.83473	0.62514	0.38606	0.22605	0.14059	0.09498	0.06897
10.95	0.9801	0.94049	0.83479	0.62518	0.38603	0.226	0.14053	0.09493	0.06893
10.96	0.98012	0.94054	0.83486	0.62522	0.386	0.22594	0.14048	0.09489	0.0689
10.97	0.98014	0.94059	0.83493	0.62525	0.38596	0.22589	0.14043	0.09485	0.06886
10.98	0.98016	0.94063	0.835	0.62529	0.38593	0.22583	0.14038	0.0948	0.06883
10.99	0.98018	0.94068	0.83507	0.62533	0.3859	0.22577	0.14033	0.09476	0.06879
11	0.9802	0.94072	0.83513	0.62536	0.38587	0.22572	0.14027	0.09472	0.06875
11.01	0.98023	0.94077	0.8352	0.6254	0.38584	0.22566	0.14022	0.09467	0.06872
11.02	0.98025	0.94081	0.83527	0.62544	0.38581	0.22561	0.14017	0.09463	0.06868
11.03	0.98027	0.94086	0.83534	0.62547	0.38578	0.22555	0.14012	0.09459	0.06865
11.04	0.98029	0.9409	0.8354	0.62551	0.38575	0.2255	0.14007	0.09454	0.06861
11.05	0.98031	0.94095	0.83547	0.62554	0.38572	0.22544	0.14001	0.0945	0.06857
11.06	0.98033	0.94099	0.83554	0.62558	0.38568	0.22539	0.13996	0.09446	0.06854
11.07	0.98035	0.94104	0.8356	0.62562	0.38565	0.22533	0.13991	0.09441	0.0685
11.08	0.98038	0.94108	0.83567	0.62565	0.38562	0.22528	0.13986	0.09437	0.06847
11.09	0.9804	0.94112	0.83574	0.62569	0.38559	0.22522	0.13981	0.09433	0.06843
11.1	0.98042	0.94117	0.8358	0.62573	0.38556	0.22517	0.13976	0.09428	0.0684
11.11	0.98044	0.94121	0.83587	0.62576	0.38553	0.22511	0.1397	0.09424	0.06836
11.12	0.98046	0.94126	0.83594	0.6258	0.3855	0.22506	0.13965	0.0942	0.06833
11.13	0.98048	0.9413	0.836	0.62583	0.38547	0.225	0.1396	0.09415	0.06829
11.14	0.9805	0.94135	0.83607	0.62587	0.38544	0.22495	0.13955	0.09411	0.06825
11.15	0.98052	0.94139	0.83614	0.62591	0.38541	0.22489	0.1395	0.09407	0.06822
11.16	0.98055	0.94143	0.8362	0.62594	0.38538	0.22484	0.13945	0.09403	0.06818
11.17	0.98057	0.94148	0.83627	0.62598	0.38534	0.22478	0.1394	0.09398	0.06815
11.18	0.98059	0.94152	0.83633	0.62601	0.38531	0.22473	0.13934	0.09394	0.06811
11.19	0.98061	0.94157	0.8364	0.62605	0.38528	0.22467	0.13929	0.0939	0.06808
11.2	0.98063	0.94161	0.83647	0.62608	0.38525	0.22462	0.13924	0.09385	0.06804
11.21	0.98065	0.94165	0.83653	0.62612	0.38522	0.22457	0.13919	0.09381	0.06801
11.22	0.98067	0.9417	0.8366	0.62616	0.38519	0.22451	0.13914	0.09377	0.06797
11.23	0.98069	0.94174	0.83666	0.62619	0.38516	0.22446	0.13909	0.09373	0.06794
11.24	0.98071	0.94178	0.83673	0.62623	0.38513	0.2244	0.13904	0.09368	0.0679
11.25	0.98073	0.94183	0.83679	0.62626	0.3851	0.22435	0.13899	0.09364	0.06787
11.26	0.98075	0.94187	0.83686	0.6263	0.38507	0.22429	0.13894	0.0936	0.06783
11.27	0.98077	0.94191	0.83692	0.62633	0.38504	0.22424	0.13889	0.09356	0.0678
11.28	0.98079	0.94196	0.83699	0.62637	0.38501	0.22419	0.13884	0.09351	0.06776
11.29	0.98081	0.942	0.83705	0.6264	0.38498	0.22413	0.13878	0.09347	0.06773
11.3	0.98083	0.94204	0.83712	0.62644	0.38495	0.22408	0.13873	0.09343	0.06769
11.31	0.98086	0.94209	0.83718	0.62648	0.38492	0.22402	0.13868	0.09339	0.06766
11.32	0.98088	0.94213	0.83725	0.62651	0.38489	0.22397	0.13863	0.09335	0.06762
11.33	0.9809	0.94217	0.83731	0.62655	0.38486	0.22392	0.13858	0.0933	0.06759
11.34	0.98092	0.94221	0.83738	0.62658	0.38483	0.22386	0.13853	0.09326	0.06755
11.35	0.98094	0.94226	0.83744	0.62662	0.3848	0.22381	0.13848	0.09322	0.06752
11.36	0.98096	0.9423	0.83751	0.62665	0.38477	0.22375	0.13843	0.09318	0.06748
11.37	0.98098	0.94234	0.83757	0.62669	0.38473	0.2237	0.13838	0.09314	0.06745
11.38	0.981	0.94238	0.83764	0.62672	0.3847	0.22365	0.13833	0.09309	0.06742
11.39	0.98102	0.94243	0.8377	0.62676	0.38467	0.22359	0.13828	0.09305	0.06738
11.4	0.98104	0.94247	0.83777	0.62679	0.38464	0.22354	0.13823	0.09301	0.06735
11.41	0.98106	0.94251	0.83783	0.62683	0.38461	0.22349	0.13818	0.09297	0.06731
11.42	0.98108	0.94255	0.83789	0.62686	0.38458	0.22343	0.13813	0.09293	0.06728
11.43	0.9811	0.9426	0.83796	0.6269	0.38455	0.22338	0.13808	0.09289	0.06724
11.44	0.98112	0.94264	0.83802	0.62693	0.38452	0.22333	0.13803	0.09284	0.06721
11.45	0.98114	0.94268	0.83809	0.62697	0.38449	0.22327	0.13798	0.0928	0.06717
11.46	0.98116	0.94272	0.83815	0.627	0.38446	0.22322	0.13793	0.09276	0.06714
11.47	0.98118	0.94276	0.83821	0.62704	0.38443	0.22317	0.13788	0.09272	0.06711
11.48	0.9812	0.9428	0.83828	0.62707	0.3844	0.22311	0.13783	0.09268	0.06707
11.49	0.98122	0.94285	0.83834	0.62711	0.38437	0.22306	0.13778	0.09264	0.06704
11.5	0.98124	0.94289	0.8384	0.62714	0.38434	0.22301	0.13773	0.0926	0.067
11.51	0.98125	0.94293	0.83847	0.62718	0.38431	0.22295	0.13768	0.09255	0.06697
11.52	0.98127	0.94297	0.83853	0.62721	0.38428	0.2229	0.13763	0.09251	0.06694
11.53	0.98129	0.94301	0.83859	0.62725	0.38425	0.22285	0.13758	0.09247	0.0669
11.54	0.98131	0.94305	0.83866	0.62728	0.38422	0.22279	0.13753	0.09243	0.06687
11.55	0.98133	0.9431	0.83872	0.62732	0.38419	0.22274	0.13748	0.09239	0.06683
11.56	0.98135	0.94314	0.83878	0.62735	0.38416	0.22269	0.13744	0.09235	0.0668
11.57	0.98137	0.94318	0.83885	0.62738	0.38413	0.22264	0.13739	0.09231	0.06677
11.58	0.98139	0.94322	0.83891	0.62742	0.3841	0.22258	0.13734	0.09227	0.06673
11.59	0.98141	0.94326	0.83897	0.62745	0.38407	0.22253	0.13729	0.09223	0.0667
11.6	0.98143	0.9433	0.83904	0.62749	0.38404	0.22248	0.13724	0.09218	0.06666
11.61	0.98145	0.94334	0.8391	0.62752	0.38402	0.22242	0.13719	0.09214	0.06663
11.62	0.98147	0.94338	0.83916	0.62756	0.38399	0.22237	0.13714	0.0921	0.0666
11.63	0.98149	0.94342	0.83922	0.62759	0.38396	0.22232	0.13709	0.09206	0.06656
11.64	0.98151	0.94346	0.83929	0.62763	0.38393	0.22227	0.13704	0.09202	0.06653
11.65	0.98153	0.94351	0.83935	0.62766	0.3839	0.22221	0.13699	0.09198	0.0665
11.66	0.98154	0.94355	0.83941	0.6277	0.38387	0.22216	0.13694	0.09194	0.06646
11.67	0.98156	0.94359	0.83947	0.62773	0.38384	0.22211	0.1369	0.0919	0.06643
11.68	0.98158	0.94363	0.83953	0.62776	0.38381	0.22206	0.13685	0.09186	0.0664
11.69	0.9816	0.94367	0.8396	0.6278	0.38378	0.222	0.1368	0.09182	0.06636
11.7	0.98162	0.94371	0.83966	0.62783	0.38375	0.22195	0.13675	0.09178	0.06633
11.71	0.98164	0.94375	0.83972	0.62787	0.38372	0.2219	0.1367	0.09174	0.0663
11.72	0.98166	0.94379	0.83978	0.6279	0.38369	0.22185	0.13665	0.0917	0.06626
11.73	0.98168	0.94383	0.83984	0.62794	0.38366	0.2218	0.1366	0.09166	0.06623
11.74	0.9817	0.94387	0.83991	0.62797	0.38363	0.22174	0.13655	0.09162	0.0662
11.75	0.98171	0.94391	0.83997	0.628	0.3836	0.22169	0.13651	0.09157	0.06616
11.76	0.98173	0.94395	0.84003	0.62804	0.38357	0.22164	0.13646	0.09153	0.06613
11.77	0.98175	0.94399	0.84009	0.62807	0.38354	0.22159	0.13641	0.09149	0.0661
11.78	0.98177	0.94403	0.84015	0.62811	0.38351	0.22154	0.13636	0.09145	0.06606
11.79	0.98179	0.94407	0.84021	0.62814	0.38348	0.22148	0.13631	0.09141	0.06603
11.8	0.98181	0.94411	0.84028	0.62817	0.38345	0.22143	0.13626	0.09137	0.066
11.81	0.98183	0.94415	0.84034	0.62821	0.38343	0.22138	0.13622	0.09133	0.06596
11.82	0.98185	0.94419	0.8404	0.62824	0.3834	0.22133	0.13617	0.09129	0.06593
11.83	0.98186	0.94423	0.84046	0.62828	0.38337	0.22128	0.13612	0.09125	0.0659
11.84	0.98188	0.94427	0.84052	0.62831	0.38334	0.22123	0.13607	0.09121	0.06586
11.85	0.9819	0.94431	0.84058	0.62834	0.38331	0.22117	0.13602	0.09117	0.06583
11.86	0.98192	0.94435	0.84064	0.62838	0.38328	0.22112	0.13598	0.09113	0.0658
11.87	0.98194	0.94438	0.8407	0.62841	0.38325	0.22107	0.13593	0.09109	0.06577
11.88	0.98196	0.94442	0.84076	0.62844	0.38322	0.22102	0.13588	0.09105	0.06573
11.89	0.98197	0.94446	0.84082	0.62848	0.38319	0.22097	0.13583	0.09101	0.0657
11.9	0.98199	0.9445	0.84088	0.62851	0.38316	0.22092	0.13578	0.09097	0.06567
11.91	0.98201	0.94454	0.84094	0.62855	0.38313	0.22087	0.13574	0.09093	0.06563
11.92	0.98203	0.94458	0.84101	0.62858	0.3831	0.22081	0.13569	0.09089	0.0656
11.93	0.98205	0.94462	0.84107	0.62861	0.38308	0.22076	0.13564	0.09086	0.06557
11.94	0.98206	0.94466	0.84113	0.62865	0.38305	0.22071	0.13559	0.09082	0.06554
11.95	0.98208	0.9447	0.84119	0.62868	0.38302	0.22066	0.13555	0.09078	0.0655
11.96	0.9821	0.94474	0.84125	0.62871	0.38299	0.22061	0.1355	0.09074	0.06547
11.97	0.98212	0.94477	0.84131	0.62875	0.38296	0.22056	0.13545	0.0907	0.06544
11.98	0.98214	0.94481	0.84137	0.62878	0.38293	0.22051	0.1354	0.09066	0.06541
11.99	0.98215	0.94485	0.84143	0.62881	0.3829	0.22046	0.13536	0.09062	0.06537
12	0.98217	0.94489	0.84149	0.62885	0.38287	0.22041	0.13531	0.09058	0.06534
12.01	0.98219	0.94493	0.84155	0.62888	0.38284	0.22035	0.13526	0.09054	0.06531
12.02	0.98221	0.94497	0.84161	0.62891	0.38282	0.2203	0.13521	0.0905	0.06528
12.03	0.98223	0.94501	0.84167	0.62895	0.38279	0.22025	0.13517	0.09046	0.06524
12.04	0.98224	0.94504	0.84173	0.62898	0.38276	0.2202	0.13512	0.09042	0.06521
12.05	0.98226	0.94508	0.84179	0.62901	0.38273	0.22015	0.13507	0.09038	0.06518
12.06	0.98228	0.94512	0.84185	0.62905	0.3827	0.2201	0.13502	0.09034	0.06515
12.07	0.9823	0.94516	0.8419	0.62908	0.38267	0.22005	0.13498	0.0903	0.06512
12.08	0.98231	0.9452	0.84196	0.62911	0.38264	0.22	0.13493	0.09027	0.06508
12.09	0.98233	0.94524	0.84202	0.62915	0.38261	0.21995	0.13488	0.09023	0.06505
12.1	0.98235	0.94527	0.84208	0.62918	0.38259	0.2199	0.13484	0.09019	0.06502
12.11	0.98237	0.94531	0.84214	0.62921	0.38256	0.21985	0.13479	0.09015	0.06499
12.12	0.98238	0.94535	0.8422	0.62925	0.38253	0.2198	0.13474	0.09011	0.06496
12.13	0.9824	0.94539	0.84226	0.62928	0.3825	0.21975	0.1347	0.09007	0.06492
12.14	0.98242	0.94542	0.84232	0.62931	0.38247	0.2197	0.13465	0.09003	0.06489
12.15	0.98244	0.94546	0.84238	0.62935	0.38244	0.21965	0.1346	0.08999	0.06486
12.16	0.98245	0.9455	0.84244	0.62938	0.38241	0.2196	0.13455	0.08995	0.06483
12.17	0.98247	0.94554	0.8425	0.62941	0.38238	0.21954	0.13451	0.08992	0.0648
12.18	0.98249	0.94558	0.84255	0.62944	0.38236	0.21949	0.13446	0.08988	0.06476
12.19	0.98251	0.94561	0.84261	0.62948	0.38233	0.21944	0.13441	0.08984	0.06473
12.2	0.98252	0.94565	0.84267	0.62951	0.3823	0.21939	0.13437	0.0898	0.0647
12.21	0.98254	0.94569	0.84273	0.62954	0.38227	0.21934	0.13432	0.08976	0.06467
12.22	0.98256	0.94573	0.84279	0.62958	0.38224	0.21929	0.13428	0.08972	0.06464
12.23	0.98258	0.94576	0.84285	0.62961	0.38221	0.21924	0.13423	0.08968	0.06461
12.24	0.98259	0.9458	0.84291	0.62964	0.38219	0.21919	0.13418	0.08965	0.06457
12.25	0.98261	0.94584	0.84296	0.62967	0.38216	0.21914	0.13414	0.08961	0.06454
12.26	0.98263	0.94587	0.84302	0.62971	0.38213	0.21909	0.13409	0.08957	0.06451
12.27	0.98264	0.94591	0.84308	0.62974	0.3821	0.21904	0.13404	0.08953	0.06448
12.28	0.98266	0.94595	0.84314	0.62977	0.38207	0.21899	0.134	0.08949	0.06445
12.29	0.98268	0.94599	0.8432	0.62981	0.38204	0.21894	0.13395	0.08945	0.06442
12.3	0.9827	0.94602	0.84325	0.62984	0.38202	0.21889	0.1339	0.08941	0.06438
12.31	0.98271	0.94606	0.84331	0.62987	0.38199	0.21885	0.13386	0.08938	0.06435
12.32	0.98273	0.9461	0.84337	0.6299	0.38196	0.2188	0.13381	0.08934	0.06432
12.33	0.98275	0.94613	0.84343	0.62994	0.38193	0.21875	0.13377	0.0893	0.06429
12.34	0.98276	0.94617	0.84349	0.62997	0.3819	0.2187	0.13372	0.08926	0.06426
12.35	0.98278	0.94621	0.84354	0.63	0.38187	0.21865	0.13367	0.08922	0.06423
12.36	0.9828	0.94624	0.8436	0.63003	0.38185	0.2186	0.13363	0.08919	0.0642
12.37	0.98281	0.94628	0.84366	0.63007	0.38182	0.21855	0.13358	0.08915	0.06417
12.38	0.98283	0.94632	0.84372	0.6301	0.38179	0.2185	0.13354	0.08911	0.06413
12.39	0.98285	0.94635	0.84377	0.63013	0.38176	0.21845	0.13349	0.08907	0.0641
12.4	0.98286	0.94639	0.84383	0.63016	0.38173	0.2184	0.13345	0.08903	0.06407
12.41	0.98288	0.94642	0.84389	0.6302	0.38171	0.21835	0.1334	0.089	0.06404
12.42	0.9829	0.94646	0.84395	0.63023	0.38168	0.2183	0.13335	0.08896	0.06401
12.43	0.98291	0.9465	0.844	0.63026	0.38165	0.21825	0.13331	0.08892	0.06398
12.44	0.98293	0.94653	0.84406	0.63029	0.38162	0.2182	0.13326	0.08888	0.06395
12.45	0.98295	0.94657	0.84412	0.63033	0.38159	0.21815	0.13322	0.08885	0.06392
12.46	0.98296	0.94661	0.84417	0.63036	0.38157	0.2181	0.13317	0.08881	0.06389
12.47	0.98298	0.94664	0.84423	0.63039	0.38154	0.21805	0.13313	0.08877	0.06385
12.48	0.983	0.94668	0.84429	0.63042	0.38151	0.21801	0.13308	0.08873	0.06382
12.49	0.98301	0.94671	0.84434	0.63045	0.38148	0.21796	0.13304	0.08869	0.06379
12.5	0.98303	0.94675	0.8444	0.63049	0.38145	0.21791	0.13299	0.08866	0.06376
12.51	0.98304	0.94679	0.84446	0.63052	0.38143	0.21786	0.13294	0.08862	0.06373
12.52	0.98306	0.94682	0.84451	0.63055	0.3814	0.21781	0.1329	0.08858	0.0637
12.53	0.98308	0.94686	0.84457	0.63058	0.38137	0.21776	0.13285	0.08854	0.06367
12.54	0.98309	0.94689	0.84463	0.63061	0.38134	0.21771	0.13281	0.08851	0.06364
12.55	0.98311	0.94693	0.84468	0.63065	0.38131	0.21766	0.13276	0.08847	0.06361
12.56	0.98313	0.94696	0.84474	0.63068	0.38129	0.21761	0.13272	0.08843	0.06358
12.57	0.98314	0.947	0.8448	0.63071	0.38126	0.21757	0.13267	0.0884	0.06355
12.58	0.98316	0.94703	0.84485	0.63074	0.38123	0.21752	0.13263	0.08836	0.06352
12.59	0.98317	0.94707	0.84491	0.63077	0.3812	0.21747	0.13258	0.08832	0.06349
12.6	0.98319	0.94711	0.84497	0.63081	0.38118	0.21742	0.13254	0.08828	0.06346
12.61	0.98321	0.94714	0.84502	0.63084	0.38115	0.21737	0.13249	0.08825	0.06342
12.62	0.98322	0.94718	0.84508	0.63087	0.38112	0.21732	0.13245	0.08821	0.06339
12.63	0.98324	0.94721	0.84513	0.6309	0.38109	0.21727	0.1324	0.08817	0.06336
12.64	0.98326	0.94725	0.84519	0.63093	0.38107	0.21723	0.13236	0.08813	0.06333
12.65	0.98327	0.94728	0.84525	0.63097	0.38104	0.21718	0.13231	0.0881	0.0633
12.66	0.98329	0.94732	0.8453	0.631	0.38101	0.21713	0.13227	0.08806	0.06327
12.67	0.9833	0.94735	0.84536	0.63103	0.38098	0.21708	0.13222	0.08802	0.06324
12.68	0.98332	0.94739	0.84541	0.63106	0.38096	0.21703	0.13218	0.08799	0.06321
12.69	0.98333	0.94742	0.84547	0.63109	0.38093	0.21698	0.13213	0.08795	0.06318
12.7	0.98335	0.94746	0.84552	0.63112	0.3809	0.21694	0.13209	0.08791	0.06315
12.71	0.98337	0.94749	0.84558	0.63116	0.38087	0.21689	0.13205	0.08788	0.06312
12.72	0.98338	0.94753	0.84563	0.63119	0.38084	0.21684	0.132	0.08784	0.06309
12.73	0.9834	0.94756	0.84569	0.63122	0.38082	0.21679	0.13196	0.0878	0.06306
12.74	0.98341	0.9476	0.84575	0.63125	0.38079	0.21674	0.13191	0.08777	0.06303
12.75	0.98343	0.94763	0.8458	0.63128	0.38076	0.21669	0.13187	0.08773	0.063
12.76	0.98345	0.94766	0.84586	0.63131	0.38074	0.21665	0.13182	0.08769	0.06297
12.77	0.98346	0.9477	0.84591	0.63135	0.38071	0.2166	0.13178	0.08766	0.06294
12.78	0.98348	0.94773	0.84597	0.63138	0.38068	0.21655	0.13173	0.08762	0.06291
12.79	0.98349	0.94777	0.84602	0.63141	0.38065	0.2165	0.13169	0.08758	0.06288
12.8	0.98351	0.9478	0.84608	0.63144	0.38063	0.21645	0.13165	0.08755	0.06285
12.81	0.98352	0.94784	0.84613	0.63147	0.3806	0.21641	0.1316	0.08751	0.06282
12.82	0.98354	0.94787	0.84619	0.6315	0.38057	0.21636	0.13156	0.08747	0.06279
12.83	0.98355	0.94791	0.84624	0.63153	0.38054	0.21631	0.13151	0.08744	0.06276
12.84	0.98357	0.94794	0.8463	0.63157	0.38052	0.21626	0.13147	0.0874	0.06273
12.85	0.98359	0.94797	0.84635	0.6316	0.38049	0.21622	0.13143	0.08736	0.0627
12.86	0.9836	0.94801	0.84641	0.63163	0.38046	0.21617	0.13138	0.08733	0.06267
12.87	0.98362	0.94804	0.84646	0.63166	0.38043	0.21612	0.13134	0.08729	0.06264
12.88	0.98363	0.94808	0.84651	0.63169	0.38041	0.21607	0.13129	0.08725	0.06261
12.89	0.98365	0.94811	0.84657	0.63172	0.38038	0.21602	0.13125	0.08722	0.06258
12.9	0.98366	0.94814	0.84662	0.63175	0.38035	0.21598	0.13121	0.08718	0.06255
12.91	0.98368	0.94818	0.84668	0.63179	0.38033	0.21593	0.13116	0.08715	0.06252
12.92	0.98369	0.94821	0.84673	0.63182	0.3803	0.21588	0.13112	0.08711	0.06249
12.93	0.98371	0.94825	0.84679	0.63185	0.38027	0.21583	0.13107	0.08707	0.06246
12.94	0.98372	0.94828	0.84684	0.63188	0.38024	0.21579	0.13103	0.08704	0.06243
12.95	0.98374	0.94831	0.84689	0.63191	0.38022	0.21574	0.13099	0.087	0.0624
12.96	0.98375	0.94835	0.84695	0.63194	0.38019	0.21569	0.13094	0.08697	0.06237
12.97	0.98377	0.94838	0.847	0.63197	0.38016	0.21565	0.1309	0.08693	0.06235
12.98	0.98378	0.94841	0.84706	0.632	0.38014	0.2156	0.13086	0.08689	0.06232
12.99	0.9838	0.94845	0.84711	0.63203	0.38011	0.21555	0.13081	0.08686	0.06229
13	0.98381	0.94848	0.84716	0.63207	0.38008	0.2155	0.13077	0.08682	0.06226
13.01	0.98383	0.94851	0.84722	0.6321	0.38006	0.21546	0.13073	0.08679	0.06223
13.02	0.98384	0.94855	0.84727	0.63213	0.38003	0.21541	0.13068	0.08675	0.0622
13.03	0.98386	0.94858	0.84733	0.63216	0.38	0.21536	0.13064	0.08671	0.06217
13.04	0.98387	0.94861	0.84738	0.63219	0.37997	0.21532	0.1306	0.08668	0.06214
13.05	0.98389	0.94865	0.84743	0.63222	0.37995	0.21527	0.13055	0.08664	0.06211
13.06	0.9839	0.94868	0.84749	0.63225	0.37992	0.21522	0.13051	0.08661	0.06208
13.07	0.98392	0.94871	0.84754	0.63228	0.37989	0.21517	0.13047	0.08657	0.06205
13.08	0.98393	0.94875	0.84759	0.63231	0.37987	0.21513	0.13042	0.08654	0.06202
13.09	0.98395	0.94878	0.84765	0.63234	0.37984	0.21508	0.13038	0.0865	0.06199
13.1	0.98396	0.94881	0.8477	0.63237	0.37981	0.21503	0.13034	0.08646	0.06196
13.11	0.98398	0.94885	0.84775	0.63241	0.37979	0.21499	0.13029	0.08643	0.06194
13.12	0.98399	0.94888	0.84781	0.63244	0.37976	0.21494	0.13025	0.08639	0.06191
13.13	0.98401	0.94891	0.84786	0.63247	0.37973	0.21489	0.13021	0.08636	0.06188
13.14	0.98402	0.94895	0.84791	0.6325	0.37971	0.21485	0.13016	0.08632	0.06185
13.15	0.98404	0.94898	0.84797	0.63253	0.37968	0.2148	0.13012	0.08629	0.06182
13.16	0.98405	0.94901	0.84802	0.63256	0.37965	0.21475	0.13008	0.08625	0.06179
13.17	0.98407	0.94904	0.84807	0.63259	0.37963	0.21471	0.13003	0.08622	0.06176
13.18	0.98408	0.94908	0.84813	0.63262	0.3796	0.21466	0.12999	0.08618	0.06173
13.19	0.9841	0.94911	0.84818	0.63265	0.37957	0.21461	0.12995	0.08615	0.0617
13.2	0.98411	0.94914	0.84823	0.63268	0.37955	0.21457	0.12991	0.08611	0.06167
13.21	0.98412	0.94917	0.84828	0.63271	0.37952	0.21452	0.12986	0.08608	0.06165
13.22	0.98414	0.94921	0.84834	0.63274	0.37949	0.21447	0.12982	0.08604	0.06162
13.23	0.98415	0.94924	0.84839	0.63277	0.37947	0.21443	0.12978	0.08601	0.06159
13.24	0.98417	0.94927	0.84844	0.6328	0.37944	0.21438	0.12974	0.08597	0.06156
13.25	0.98418	0.9493	0.8485	0.63283	0.37941	0.21433	0.12969	0.08593	0.06153
13.26	0.9842	0.94934	0.84855	0.63287	0.37939	0.21429	0.12965	0.0859	0.0615
13.27	0.98421	0.94937	0.8486	0.6329	0.37936	0.21424	0.12961	0.08586	0.06147
13.28	0.98423	0.9494	0.84865	0.63293	0.37933	0.2142	0.12957	0.08583	0.06144
13.29	0.98424	0.94943	0.8487	0.63296	0.37931	0.21415	0.12952	0.08579	0.06142
13.3	0.98425	0.94947	0.84876	0.63299	0.37928	0.2141	0.12948	0.08576	0.06139
13.31	0.98427	0.9495	0.84881	0.63302	0.37925	0.21406	0.12944	0.08572	0.06136
13.32	0.98428	0.94953	0.84886	0.63305	0.37923	0.21401	0.1294	0.08569	0.06133
13.33	0.9843	0.94956	0.84891	0.63308	0.3792	0.21397	0.12935	0.08565	0.0613
13.34	0.98431	0.94959	0.84897	0.63311	0.37917	0.21392	0.12931	0.08562	0.06127
13.35	0.98433	0.94963	0.84902	0.63314	0.37915	0.21387	0.12927	0.08559	0.06124
13.36	0.98434	0.94966	0.84907	0.63317	0.37912	0.21383	0.12923	0.08555	0.06122
13.37	0.98435	0.94969	0.84912	0.6332	0.3791	0.21378	0.12918	0.08552	0.06119
13.38	0.98437	0.94972	0.84917	0.63323	0.37907	0.21374	0.12914	0.08548	0.06116
13.39	0.98438	0.94975	0.84923	0.63326	0.37904	0.21369	0.1291	0.08545	0.06113
13.4	0.9844	0.94979	0.84928	0.63329	0.37902	0.21364	0.12906	0.08541	0.0611
13.41	0.98441	0.94982	0.84933	0.63332	0.37899	0.2136	0.12902	0.08538	0.06107
13.42	0.98443	0.94985	0.84938	0.63335	0.37896	0.21355	0.12897	0.08534	0.06105
13.43	0.98444	0.94988	0.84943	0.63338	0.37894	0.21351	0.12893	0.08531	0.06102
13.44	0.98445	0.94991	0.84948	0.63341	0.37891	0.21346	0.12889	0.08527	0.06099
13.45	0.98447	0.94994	0.84954	0.63344	0.37888	0.21341	0.12885	0.08524	0.06096
13.46	0.98448	0.94997	0.84959	0.63347	0.37886	0.21337	0.12881	0.0852	0.06093
13.47	0.9845	0.95001	0.84964	0.6335	0.37883	0.21332	0.12876	0.08517	0.0609
13.48	0.98451	0.95004	0.84969	0.63353	0.37881	0.21328	0.12872	0.08514	0.06088
13.49	0.98452	0.95007	0.84974	0.63356	0.37878	0.21323	0.12868	0.0851	0.06085
13.5	0.98454	0.9501	0.84979	0.63359	0.37875	0.21319	0.12864	0.08507	0.06082
13.51	0.98455	0.95013	0.84984	0.63362	0.37873	0.21314	0.1286	0.08503	0.06079
13.52	0.98457	0.95016	0.8499	0.63365	0.3787	0.2131	0.12855	0.085	0.06076
13.53	0.98458	0.95019	0.84995	0.63368	0.37868	0.21305	0.12851	0.08496	0.06074
13.54	0.98459	0.95023	0.85	0.63371	0.37865	0.213	0.12847	0.08493	0.06071
13.55	0.98461	0.95026	0.85005	0.63374	0.37862	0.21296	0.12843	0.0849	0.06068
13.56	0.98462	0.95029	0.8501	0.63377	0.3786	0.21291	0.12839	0.08486	0.06065
13.57	0.98463	0.95032	0.85015	0.6338	0.37857	0.21287	0.12835	0.08483	0.06062
13.58	0.98465	0.95035	0.8502	0.63383	0.37855	0.21282	0.12831	0.08479	0.0606
13.59	0.98466	0.95038	0.85025	0.63386	0.37852	0.21278	0.12826	0.08476	0.06057
13.6	0.98468	0.95041	0.8503	0.63389	0.37849	0.21273	0.12822	0.08472	0.06054
13.61	0.98469	0.95044	0.85035	0.63392	0.37847	0.21269	0.12818	0.08469	0.06051
13.62	0.9847	0.95047	0.85041	0.63395	0.37844	0.21264	0.12814	0.08466	0.06049
13.63	0.98472	0.9505	0.85046	0.63398	0.37842	0.2126	0.1281	0.08462	0.06046
13.64	0.98473	0.95054	0.85051	0.63401	0.37839	0.21255	0.12806	0.08459	0.06043
13.65	0.98474	0.95057	0.85056	0.63404	0.37836	0.21251	0.12802	0.08455	0.0604
13.66	0.98476	0.9506	0.85061	0.63407	0.37834	0.21246	0.12797	0.08452	0.06037
13.67	0.98477	0.95063	0.85066	0.6341	0.37831	0.21242	0.12793	0.08449	0.06035
13.68	0.98478	0.95066	0.85071	0.63413	0.37829	0.21237	0.12789	0.08445	0.06032
13.69	0.9848	0.95069	0.85076	0.63416	0.37826	0.21233	0.12785	0.08442	0.06029
13.7	0.98481	0.95072	0.85081	0.63419	0.37823	0.21228	0.12781	0.08439	0.06026
13.71	0.98482	0.95075	0.85086	0.63422	0.37821	0.21224	0.12777	0.08435	0.06024
13.72	0.98484	0.95078	0.85091	0.63425	0.37818	0.21219	0.12773	0.08432	0.06021
13.73	0.98485	0.95081	0.85096	0.63428	0.37816	0.21215	0.12769	0.08428	0.06018
13.74	0.98486	0.95084	0.85101	0.6343	0.37813	0.2121	0.12765	0.08425	0.06015
13.75	0.98488	0.95087	0.85106	0.63433	0.3781	0.21206	0.1276	0.08422	0.06013
13.76	0.98489	0.9509	0.85111	0.63436	0.37808	0.21201	0.12756	0.08418	0.0601
13.77	0.9849	0.95093	0.85116	0.63439	0.37805	0.21197	0.12752	0.08415	0.06007
13.78	0.98492	0.95096	0.85121	0.63442	0.37803	0.21192	0.12748	0.08412	0.06004
13.79	0.98493	0.95099	0.85126	0.63445	0.378	0.21188	0.12744	0.08408	0.06002
13.8	0.98494	0.95102	0.85131	0.63448	0.37798	0.21183	0.1274	0.08405	0.05999
13.81	0.98496	0.95105	0.85136	0.63451	0.37795	0.21179	0.12736	0.08402	0.05996
13.82	0.98497	0.95108	0.85141	0.63454	0.37792	0.21175	0.12732	0.08398	0.05993
13.83	0.98498	0.95111	0.85146	0.63457	0.3779	0.2117	0.12728	0.08395	0.05991
13.84	0.985	0.95114	0.85151	0.6346	0.37787	0.21166	0.12724	0.08392	0.05988
13.85	0.98501	0.95117	0.85156	0.63463	0.37785	0.21161	0.1272	0.08388	0.05985
13.86	0.98502	0.9512	0.85161	0.63466	0.37782	0.21157	0.12716	0.08385	0.05983
13.87	0.98504	0.95123	0.85166	0.63469	0.3778	0.21152	0.12711	0.08382	0.0598
13.88	0.98505	0.95126	0.85171	0.63472	0.37777	0.21148	0.12707	0.08378	0.05977
13.89	0.98506	0.95129	0.85176	0.63475	0.37775	0.21143	0.12703	0.08375	0.05974
13.9	0.98508	0.95132	0.85181	0.63477	0.37772	0.21139	0.12699	0.08372	0.05972
13.91	0.98509	0.95135	0.85186	0.6348	0.37769	0.21135	0.12695	0.08368	0.05969
13.92	0.9851	0.95138	0.85191	0.63483	0.37767	0.2113	0.12691	0.08365	0.05966
13.93	0.98512	0.95141	0.85196	0.63486	0.37764	0.21126	0.12687	0.08362	0.05964
13.94	0.98513	0.95144	0.852	0.63489	0.37762	0.21121	0.12683	0.08358	0.05961
13.95	0.98514	0.95147	0.85205	0.63492	0.37759	0.21117	0.12679	0.08355	0.05958
13.96	0.98515	0.9515	0.8521	0.63495	0.37757	0.21113	0.12675	0.08352	0.05955
13.97	0.98517	0.95153	0.85215	0.63498	0.37754	0.21108	0.12671	0.08348	0.05953
13.98	0.98518	0.95156	0.8522	0.63501	0.37752	0.21104	0.12667	0.08345	0.0595
13.99	0.98519	0.95159	0.85225	0.63504	0.37749	0.21099	0.12663	0.08342	0.05947
14	0.98521	0.95162	0.8523	0.63507	0.37747	0.21095	0.12659	0.08338	0.05945
14.01	0.98522	0.95165	0.85235	0.63509	0.37744	0.21091	0.12655	0.08335	0.05942
14.02	0.98523	0.95168	0.8524	0.63512	0.37741	0.21086	0.12651	0.08332	0.05939
14.03	0.98524	0.95171	0.85245	0.63515	0.37739	0.21082	0.12647	0.08329	0.05937
14.04	0.98526	0.95174	0.85249	0.63518	0.37736	0.21077	0.12643	0.08325	0.05934
14.05	0.98527	0.95177	0.85254	0.63521	0.37734	0.21073	0.12639	0.08322	0.05931
14.06	0.98528	0.9518	0.85259	0.63524	0.37731	0.21069	0.12635	0.08319	0.05929
14.07	0.9853	0.95182	0.85264	0.63527	0.37729	0.21064	0.12631	0.08315	0.05926
14.08	0.98531	0.95185	0.85269	0.6353	0.37726	0.2106	0.12627	0.08312	0.05923
14.09	0.98532	0.95188	0.85274	0.63533	0.37724	0.21055	0.12623	0.08309	0.05921
14.1	0.98533	0.95191	0.85279	0.63536	0.37721	0.21051	0.12619	0.08306	0.05918
14.11	0.98535	0.95194	0.85283	0.63538	0.37719	0.21047	0.12615	0.08302	0.05915
14.12	0.98536	0.95197	0.85288	0.63541	0.37716	0.21042	0.12611	0.08299	0.05913
14.13	0.98537	0.952	0.85293	0.63544	0.37714	0.21038	0.12607	0.08296	0.0591
14.14	0.98538	0.95203	0.85298	0.63547	0.37711	0.21034	0.12603	0.08293	0.05907
14.15	0.9854	0.95206	0.85303	0.6355	0.37709	0.21029	0.12599	0.08289	0.05905
14.16	0.98541	0.95209	0.85308	0.63553	0.37706	0.21025	0.12595	0.08286	0.05902
14.17	0.98542	0.95211	0.85313	0.63556	0.37704	0.21021	0.12591	0.08283	0.05899
14.18	0.98544	0.95214	0.85317	0.63559	0.37701	0.21016	0.12587	0.0828	0.05897
14.19	0.98545	0.95217	0.85322	0.63561	0.37699	0.21012	0.12583	0.08276	0.05894
14.2	0.98546	0.9522	0.85327	0.63564	0.37696	0.21007	0.12579	0.08273	0.05891
14.21	0.98547	0.95223	0.85332	0.63567	0.37693	0.21003	0.12575	0.0827	0.05889
14.22	0.98549	0.95226	0.85337	0.6357	0.37691	0.20999	0.12571	0.08267	0.05886
14.23	0.9855	0.95229	0.85341	0.63573	0.37688	0.20994	0.12567	0.08263	0.05884
14.24	0.98551	0.95232	0.85346	0.63576	0.37686	0.2099	0.12563	0.0826	0.05881
14.25	0.98552	0.95234	0.85351	0.63579	0.37683	0.20986	0.12559	0.08257	0.05878
14.26	0.98553	0.95237	0.85356	0.63581	0.37681	0.20981	0.12556	0.08254	0.05876
14.27	0.98555	0.9524	0.85361	0.63584	0.37678	0.20977	0.12552	0.08251	0.05873
14.28	0.98556	0.95243	0.85365	0.63587	0.37676	0.20973	0.12548	0.08247	0.0587
14.29	0.98557	0.95246	0.8537	0.6359	0.37673	0.20969	0.12544	0.08244	0.05868
14.3	0.98558	0.95249	0.85375	0.63593	0.37671	0.20964	0.1254	0.08241	0.05865
14.31	0.9856	0.95252	0.8538	0.63596	0.37668	0.2096	0.12536	0.08238	0.05863
14.32	0.98561	0.95254	0.85384	0.63599	0.37666	0.20956	0.12532	0.08234	0.0586
14.33	0.98562	0.95257	0.85389	0.63601	0.37663	0.20951	0.12528	0.08231	0.05857
14.34	0.98563	0.9526	0.85394	0.63604	0.37661	0.20947	0.12524	0.08228	0.05855
14.35	0.98565	0.95263	0.85399	0.63607	0.37658	0.20943	0.1252	0.08225	0.05852
14.36	0.98566	0.95266	0.85403	0.6361	0.37656	0.20938	0.12516	0.08222	0.05849
14.37	0.98567	0.95268	0.85408	0.63613	0.37654	0.20934	0.12512	0.08218	0.05847
14.38	0.98568	0.95271	0.85413	0.63616	0.37651	0.2093	0.12508	0.08215	0.05844
14.39	0.98569	0.95274	0.85418	0.63618	0.37649	0.20926	0.12505	0.08212	0.05842
14.4	0.98571	0.95277	0.85422	0.63621	0.37646	0.20921	0.12501	0.08209	0.05839
14.41	0.98572	0.9528	0.85427	0.63624	0.37644	0.20917	0.12497	0.08206	0.05836
14.42	0.98573	0.95283	0.85432	0.63627	0.37641	0.20913	0.12493	0.08202	0.05834
14.43	0.98574	0.95285	0.85436	0.6363	0.37639	0.20908	0.12489	0.08199	0.05831
14.44	0.98575	0.95288	0.85441	0.63633	0.37636	0.20904	0.12485	0.08196	0.05829
14.45	0.98577	0.95291	0.85446	0.63635	0.37634	0.209	0.12481	0.08193	0.05826
14.46	0.98578	0.95294	0.85451	0.63638	0.37631	0.20896	0.12477	0.0819	0.05824
14.47	0.98579	0.95296	0.85455	0.63641	0.37629	0.20891	0.12473	0.08187	0.05821
14.48	0.9858	0.95299	0.8546	0.63644	0.37626	0.20887	0.1247	0.08183	0.05818
14.49	0.98581	0.95302	0.85465	0.63647	0.37624	0.20883	0.12466	0.0818	0.05816
14.5	0.98583	0.95305	0.85469	0.6365	0.37621	0.20879	0.12462	0.08177	0.05813
14.51	0.98584	0.95308	0.85474	0.63652	0.37619	0.20874	0.12458	0.08174	0.05811
14.52	0.98585	0.9531	0.85479	0.63655	0.37616	0.2087	0.12454	0.08171	0.05808
14.53	0.98586	0.95313	0.85483	0.63658	0.37614	0.20866	0.1245	0.08168	0.05806
14.54	0.98587	0.95316	0.85488	0.63661	0.37611	0.20862	0.12446	0.08164	0.05803
14.55	0.98589	0.95319	0.85493	0.63664	0.37609	0.20857	0.12442	0.08161	0.058
14.56	0.9859	0.95321	0.85497	0.63666	0.37606	0.20853	0.12439	0.08158	0.05798
14.57	0.98591	0.95324	0.85502	0.63669	0.37604	0.20849	0.12435	0.08155	0.05795
14.58	0.98592	0.95327	0.85507	0.63672	0.37602	0.20845	0.12431	0.08152	0.05793
14.59	0.98593	0.9533	0.85511	0.63675	0.37599	0.2084	0.12427	0.08149	0.0579
14.6	0.98595	0.95332	0.85516	0.63678	0.37597	0.20836	0.12423	0.08146	0.05788
14.61	0.98596	0.95335	0.85521	0.6368	0.37594	0.20832	0.12419	0.08142	0.05785
14.62	0.98597	0.95338	0.85525	0.63683	0.37592	0.20828	0.12416	0.08139	0.05782
14.63	0.98598	0.95341	0.8553	0.63686	0.37589	0.20823	0.12412	0.08136	0.0578
14.64	0.98599	0.95343	0.85535	0.63689	0.37587	0.20819	0.12408	0.08133	0.05777
14.65	0.986	0.95346	0.85539	0.63692	0.37584	0.20815	0.12404	0.0813	0.05775
14.66	0.98602	0.95349	0.85544	0.63694	0.37582	0.20811	0.124	0.08127	0.05772
14.67	0.98603	0.95351	0.85548	0.63697	0.37579	0.20807	0.12396	0.08124	0.0577
14.68	0.98604	0.95354	0.85553	0.637	0.37577	0.20802	0.12393	0.08121	0.05767
14.69	0.98605	0.95357	0.85558	0.63703	0.37575	0.20798	0.12389	0.08117	0.05765
14.7	0.98606	0.9536	0.85562	0.63706	0.37572	0.20794	0.12385	0.08114	0.05762
14.71	0.98607	0.95362	0.85567	0.63708	0.3757	0.2079	0.12381	0.08111	0.0576
14.72	0.98609	0.95365	0.85571	0.63711	0.37567	0.20786	0.12377	0.08108	0.05757
14.73	0.9861	0.95368	0.85576	0.63714	0.37565	0.20781	0.12374	0.08105	0.05755
14.74	0.98611	0.9537	0.85581	0.63717	0.37562	0.20777	0.1237	0.08102	0.05752
14.75	0.98612	0.95373	0.85585	0.63719	0.3756	0.20773	0.12366	0.08099	0.0575
14.76	0.98613	0.95376	0.8559	0.63722	0.37558	0.20769	0.12362	0.08096	0.05747
14.77	0.98614	0.95379	0.85594	0.63725	0.37555	0.20765	0.12358	0.08093	0.05745
14.78	0.98616	0.95381	0.85599	0.63728	0.37553	0.2076	0.12355	0.08089	0.05742
14.79	0.98617	0.95384	0.85603	0.63731	0.3755	0.20756	0.12351	0.08086	0.05739
14.8	0.98618	0.95387	0.85608	0.63733	0.37548	0.20752	0.12347	0.08083	0.05737
14.81	0.98619	0.95389	0.85613	0.63736	0.37545	0.20748	0.12343	0.0808	0.05734
14.82	0.9862	0.95392	0.85617	0.63739	0.37543	0.20744	0.12339	0.08077	0.05732
14.83	0.98621	0.95395	0.85622	0.63742	0.3754	0.20739	0.12336	0.08074	0.05729
14.84	0.98622	0.95397	0.85626	0.63744	0.37538	0.20735	0.12332	0.08071	0.05727
14.85	0.98624	0.954	0.85631	0.63747	0.37536	0.20731	0.12328	0.08068	0.05724
14.86	0.98625	0.95403	0.85635	0.6375	0.37533	0.20727	0.12324	0.08065	0.05722
14.87	0.98626	0.95405	0.8564	0.63753	0.37531	0.20723	0.1232	0.08062	0.05719
14.88	0.98627	0.95408	0.85644	0.63755	0.37528	0.20719	0.12317	0.08059	0.05717
14.89	0.98628	0.95411	0.85649	0.63758	0.37526	0.20715	0.12313	0.08056	0.05714
14.9	0.98629	0.95413	0.85654	0.63761	0.37524	0.2071	0.12309	0.08053	0.05712
14.91	0.9863	0.95416	0.85658	0.63764	0.37521	0.20706	0.12305	0.08049	0.05709
14.92	0.98631	0.95418	0.85663	0.63766	0.37519	0.20702	0.12302	0.08046	0.05707
14.93	0.98633	0.95421	0.85667	0.63769	0.37516	0.20698	0.12298	0.08043	0.05705
14.94	0.98634	0.95424	0.85672	0.63772	0.37514	0.20694	0.12294	0.0804	0.05702
14.95	0.98635	0.95426	0.85676	0.63775	0.37511	0.2069	0.1229	0.08037	0.057
14.96	0.98636	0.95429	0.85681	0.63777	0.37509	0.20685	0.12287	0.08034	0.05697
14.97	0.98637	0.95432	0.85685	0.6378	0.37507	0.20681	0.12283	0.08031	0.05695
14.98	0.98638	0.95434	0.8569	0.63783	0.37504	0.20677	0.12279	0.08028	0.05692
14.99	0.98639	0.95437	0.85694	0.63786	0.37502	0.20673	0.12275	0.08025	0.0569
15	0.9864	0.9544	0.85699	0.63788	0.37499	0.20669	0.12272	0.08022	0.05687
15.01	0.98642	0.95442	0.85703	0.63791	0.37497	0.20665	0.12268	0.08019	0.05685
15.02	0.98643	0.95445	0.85708	0.63794	0.37495	0.20661	0.12264	0.08016	0.05682
15.03	0.98644	0.95447	0.85712	0.63797	0.37492	0.20657	0.12261	0.08013	0.0568
15.04	0.98645	0.9545	0.85717	0.63799	0.3749	0.20652	0.12257	0.0801	0.05677
15.05	0.98646	0.95453	0.85721	0.63802	0.37487	0.20648	0.12253	0.08007	0.05675
15.06	0.98647	0.95455	0.85725	0.63805	0.37485	0.20644	0.12249	0.08004	0.05672
15.07	0.98648	0.95458	0.8573	0.63807	0.37483	0.2064	0.12246	0.08001	0.0567
15.08	0.98649	0.9546	0.85734	0.6381	0.3748	0.20636	0.12242	0.07998	0.05667
15.09	0.9865	0.95463	0.85739	0.63813	0.37478	0.20632	0.12238	0.07995	0.05665
15.1	0.98652	0.95466	0.85743	0.63816	0.37475	0.20628	0.12234	0.07992	0.05663
15.11	0.98653	0.95468	0.85748	0.63818	0.37473	0.20624	0.12231	0.07989	0.0566
15.12	0.98654	0.95471	0.85752	0.63821	0.37471	0.2062	0.12227	0.07986	0.05658
15.13	0.98655	0.95473	0.85757	0.63824	0.37468	0.20616	0.12223	0.07983	0.05655
15.14	0.98656	0.95476	0.85761	0.63826	0.37466	0.20611	0.1222	0.0798	0.05653
15.15	0.98657	0.95478	0.85766	0.63829	0.37463	0.20607	0.12216	0.07977	0.0565
15.16	0.98658	0.95481	0.8577	0.63832	0.37461	0.20603	0.12212	0.07974	0.05648
15.17	0.98659	0.95484	0.85774	0.63835	0.37459	0.20599	0.12209	0.07971	0.05645
15.18	0.9866	0.95486	0.85779	0.63837	0.37456	0.20595	0.12205	0.07968	0.05643
15.19	0.98661	0.95489	0.85783	0.6384	0.37454	0.20591	0.12201	0.07965	0.05641
15.2	0.98662	0.95491	0.85788	0.63843	0.37452	0.20587	0.12198	0.07962	0.05638
15.21	0.98664	0.95494	0.85792	0.63845	0.37449	0.20583	0.12194	0.07959	0.05636
15.22	0.98665	0.95496	0.85796	0.63848	0.37447	0.20579	0.1219	0.07956	0.05633
15.23	0.98666	0.95499	0.85801	0.63851	0.37444	0.20575	0.12187	0.07953	0.05631
15.24	0.98667	0.95502	0.85805	0.63854	0.37442	0.20571	0.12183	0.0795	0.05629
15.25	0.98668	0.95504	0.8581	0.63856	0.3744	0.20567	0.12179	0.07947	0.05626
15.26	0.98669	0.95507	0.85814	0.63859	0.37437	0.20563	0.12175	0.07944	0.05624
15.27	0.9867	0.95509	0.85818	0.63862	0.37435	0.20558	0.12172	0.07941	0.05621
15.28	0.98671	0.95512	0.85823	0.63864	0.37433	0.20554	0.12168	0.07938	0.05619
15.29	0.98672	0.95514	0.85827	0.63867	0.3743	0.2055	0.12165	0.07935	0.05616
15.3	0.98673	0.95517	0.85832	0.6387	0.37428	0.20546	0.12161	0.07932	0.05614
15.31	0.98674	0.95519	0.85836	0.63872	0.37425	0.20542	0.12157	0.07929	0.05612
15.32	0.98675	0.95522	0.8584	0.63875	0.37423	0.20538	0.12154	0.07926	0.05609
15.33	0.98676	0.95524	0.85845	0.63878	0.37421	0.20534	0.1215	0.07923	0.05607
15.34	0.98678	0.95527	0.85849	0.6388	0.37418	0.2053	0.12146	0.0792	0.05604
15.35	0.98679	0.95529	0.85853	0.63883	0.37416	0.20526	0.12143	0.07917	0.05602
15.36	0.9868	0.95532	0.85858	0.63886	0.37414	0.20522	0.12139	0.07914	0.056
15.37	0.98681	0.95534	0.85862	0.63889	0.37411	0.20518	0.12135	0.07911	0.05597
15.38	0.98682	0.95537	0.85867	0.63891	0.37409	0.20514	0.12132	0.07908	0.05595
15.39	0.98683	0.95539	0.85871	0.63894	0.37407	0.2051	0.12128	0.07905	0.05592
15.4	0.98684	0.95542	0.85875	0.63897	0.37404	0.20506	0.12124	0.07902	0.0559
15.41	0.98685	0.95545	0.8588	0.63899	0.37402	0.20502	0.12121	0.07899	0.05588
15.42	0.98686	0.95547	0.85884	0.63902	0.37399	0.20498	0.12117	0.07896	0.05585
15.43	0.98687	0.9555	0.85888	0.63905	0.37397	0.20494	0.12114	0.07893	0.05583
15.44	0.98688	0.95552	0.85893	0.63907	0.37395	0.2049	0.1211	0.0789	0.0558
15.45	0.98689	0.95554	0.85897	0.6391	0.37392	0.20486	0.12106	0.07887	0.05578
15.46	0.9869	0.95557	0.85901	0.63913	0.3739	0.20482	0.12103	0.07885	0.05576
15.47	0.98691	0.95559	0.85906	0.63915	0.37388	0.20478	0.12099	0.07882	0.05573
15.48	0.98692	0.95562	0.8591	0.63918	0.37385	0.20474	0.12095	0.07879	0.05571
15.49	0.98693	0.95564	0.85914	0.63921	0.37383	0.2047	0.12092	0.07876	0.05569
15.5	0.98694	0.95567	0.85919	0.63923	0.37381	0.20466	0.12088	0.07873	0.05566
15.51	0.98695	0.95569	0.85923	0.63926	0.37378	0.20462	0.12085	0.0787	0.05564
15.52	0.98696	0.95572	0.85927	0.63929	0.37376	0.20458	0.12081	0.07867	0.05561
15.53	0.98697	0.95574	0.85931	0.63931	0.37374	0.20454	0.12077	0.07864	0.05559
15.54	0.98699	0.95577	0.85936	0.63934	0.37371	0.2045	0.12074	0.07861	0.05557
15.55	0.987	0.95579	0.8594	0.63937	0.37369	0.20446	0.1207	0.07858	0.05554
15.56	0.98701	0.95582	0.85944	0.63939	0.37367	0.20442	0.12067	0.07855	0.05552
15.57	0.98702	0.95584	0.85949	0.63942	0.37364	0.20438	0.12063	0.07852	0.0555
15.58	0.98703	0.95587	0.85953	0.63945	0.37362	0.20434	0.12059	0.07849	0.05547
15.59	0.98704	0.95589	0.85957	0.63947	0.3736	0.2043	0.12056	0.07847	0.05545
15.6	0.98705	0.95592	0.85961	0.6395	0.37357	0.20426	0.12052	0.07844	0.05543
15.61	0.98706	0.95594	0.85966	0.63952	0.37355	0.20422	0.12049	0.07841	0.0554
15.62	0.98707	0.95596	0.8597	0.63955	0.37353	0.20418	0.12045	0.07838	0.05538
15.63	0.98708	0.95599	0.85974	0.63958	0.3735	0.20414	0.12042	0.07835	0.05536
15.64	0.98709	0.95601	0.85979	0.6396	0.37348	0.2041	0.12038	0.07832	0.05533
15.65	0.9871	0.95604	0.85983	0.63963	0.37346	0.20406	0.12034	0.07829	0.05531
15.66	0.98711	0.95606	0.85987	0.63966	0.37343	0.20402	0.12031	0.07826	0.05528
15.67	0.98712	0.95609	0.85991	0.63968	0.37341	0.20398	0.12027	0.07823	0.05526
15.68	0.98713	0.95611	0.85996	0.63971	0.37339	0.20394	0.12024	0.0782	0.05524
15.69	0.98714	0.95614	0.86	0.63974	0.37336	0.2039	0.1202	0.07818	0.05521
15.7	0.98715	0.95616	0.86004	0.63976	0.37334	0.20386	0.12017	0.07815	0.05519
15.71	0.98716	0.95618	0.86008	0.63979	0.37332	0.20382	0.12013	0.07812	0.05517
15.72	0.98717	0.95621	0.86013	0.63981	0.37329	0.20378	0.12009	0.07809	0.05514
15.73	0.98718	0.95623	0.86017	0.63984	0.37327	0.20374	0.12006	0.07806	0.05512
15.74	0.98719	0.95626	0.86021	0.63987	0.37325	0.2037	0.12002	0.07803	0.0551
15.75	0.9872	0.95628	0.86025	0.63989	0.37322	0.20366	0.11999	0.078	0.05507
15.76	0.98721	0.9563	0.86029	0.63992	0.3732	0.20362	0.11995	0.07797	0.05505
15.77	0.98722	0.95633	0.86034	0.63995	0.37318	0.20359	0.11992	0.07795	0.05503
15.78	0.98723	0.95635	0.86038	0.63997	0.37315	0.20355	0.11988	0.07792	0.05501
15.79	0.98724	0.95638	0.86042	0.64	0.37313	0.20351	0.11985	0.07789	0.05498
15.8	0.98725	0.9564	0.86046	0.64002	0.37311	0.20347	0.11981	0.07786	0.05496
15.81	0.98726	0.95642	0.86051	0.64005	0.37309	0.20343	0.11978	0.07783	0.05494
15.82	0.98727	0.95645	0.86055	0.64008	0.37306	0.20339	0.11974	0.0778	0.05491
15.83	0.98728	0.95647	0.86059	0.6401	0.37304	0.20335	0.1197	0.07777	0.05489
15.84	0.98729	0.9565	0.86063	0.64013	0.37302	0.20331	0.11967	0.07774	0.05487
15.85	0.9873	0.95652	0.86067	0.64016	0.37299	0.20327	0.11963	0.07772	0.05484
15.86	0.98731	0.95654	0.86072	0.64018	0.37297	0.20323	0.1196	0.07769	0.05482
15.87	0.98732	0.95657	0.86076	0.64021	0.37295	0.20319	0.11956	0.07766	0.0548
15.88	0.98733	0.95659	0.8608	0.64023	0.37292	0.20315	0.11953	0.07763	0.05477
15.89	0.98734	0.95662	0.86084	0.64026	0.3729	0.20311	0.11949	0.0776	0.05475
15.9	0.98735	0.95664	0.86088	0.64029	0.37288	0.20308	0.11946	0.07757	0.05473
15.91	0.98736	0.95666	0.86092	0.64031	0.37286	0.20304	0.11942	0.07755	0.0547
15.92	0.98737	0.95669	0.86097	0.64034	0.37283	0.203	0.11939	0.07752	0.05468
15.93	0.98738	0.95671	0.86101	0.64036	0.37281	0.20296	0.11935	0.07749	0.05466
15.94	0.98739	0.95673	0.86105	0.64039	0.37279	0.20292	0.11932	0.07746	0.05464
15.95	0.9874	0.95676	0.86109	0.64042	0.37276	0.20288	0.11928	0.07743	0.05461
15.96	0.98741	0.95678	0.86113	0.64044	0.37274	0.20284	0.11925	0.0774	0.05459
15.97	0.98742	0.95681	0.86117	0.64047	0.37272	0.2028	0.11921	0.07738	0.05457
15.98	0.98743	0.95683	0.86122	0.64049	0.37269	0.20276	0.11918	0.07735	0.05454
15.99	0.98744	0.95685	0.86126	0.64052	0.37267	0.20272	0.11914	0.07732	0.05452
16	0.98745	0.95688	0.8613	0.64055	0.37265	0.20269	0.11911	0.07729	0.0545
16.01	0.98746	0.9569	0.86134	0.64057	0.37263	0.20265	0.11907	0.07726	0.05448
16.02	0.98747	0.95692	0.86138	0.6406	0.3726	0.20261	0.11904	0.07723	0.05445
16.03	0.98748	0.95695	0.86142	0.64062	0.37258	0.20257	0.119	0.07721	0.05443
16.04	0.98749	0.95697	0.86146	0.64065	0.37256	0.20253	0.11897	0.07718	0.05441
16.05	0.9875	0.95699	0.86151	0.64068	0.37253	0.20249	0.11893	0.07715	0.05439
16.06	0.98751	0.95702	0.86155	0.6407	0.37251	0.20245	0.1189	0.07712	0.05436
16.07	0.98752	0.95704	0.86159	0.64073	0.37249	0.20241	0.11887	0.07709	0.05434
16.08	0.98753	0.95706	0.86163	0.64075	0.37247	0.20237	0.11883	0.07707	0.05432
16.09	0.98754	0.95709	0.86167	0.64078	0.37244	0.20234	0.1188	0.07704	0.05429
16.1	0.98754	0.95711	0.86171	0.6408	0.37242	0.2023	0.11876	0.07701	0.05427
16.11	0.98755	0.95713	0.86175	0.64083	0.3724	0.20226	0.11873	0.07698	0.05425
16.12	0.98756	0.95716	0.86179	0.64086	0.37237	0.20222	0.11869	0.07695	0.05423
16.13	0.98757	0.95718	0.86184	0.64088	0.37235	0.20218	0.11866	0.07693	0.0542
16.14	0.98758	0.9572	0.86188	0.64091	0.37233	0.20214	0.11862	0.0769	0.05418
16.15	0.98759	0.95723	0.86192	0.64093	0.37231	0.2021	0.11859	0.07687	0.05416
16.16	0.9876	0.95725	0.86196	0.64096	0.37228	0.20207	0.11855	0.07684	0.05414
16.17	0.98761	0.95727	0.862	0.64098	0.37226	0.20203	0.11852	0.07681	0.05411
16.18	0.98762	0.9573	0.86204	0.64101	0.37224	0.20199	0.11848	0.07679	0.05409
16.19	0.98763	0.95732	0.86208	0.64104	0.37222	0.20195	0.11845	0.07676	0.05407
16.2	0.98764	0.95734	0.86212	0.64106	0.37219	0.20191	0.11842	0.07673	0.05405
16.21	0.98765	0.95736	0.86216	0.64109	0.37217	0.20187	0.11838	0.0767	0.05402
16.22	0.98766	0.95739	0.8622	0.64111	0.37215	0.20183	0.11835	0.07667	0.054
16.23	0.98767	0.95741	0.86224	0.64114	0.37213	0.2018	0.11831	0.07665	0.05398
16.24	0.98768	0.95743	0.86228	0.64116	0.3721	0.20176	0.11828	0.07662	0.05396
16.25	0.98769	0.95746	0.86233	0.64119	0.37208	0.20172	0.11824	0.07659	0.05393
16.26	0.9877	0.95748	0.86237	0.64122	0.37206	0.20168	0.11821	0.07656	0.05391
16.27	0.98771	0.9575	0.86241	0.64124	0.37203	0.20164	0.11818	0.07654	0.05389
16.28	0.98772	0.95752	0.86245	0.64127	0.37201	0.2016	0.11814	0.07651	0.05387
16.29	0.98773	0.95755	0.86249	0.64129	0.37199	0.20157	0.11811	0.07648	0.05384
16.3	0.98774	0.95757	0.86253	0.64132	0.37197	0.20153	0.11807	0.07645	0.05382
16.31	0.98774	0.95759	0.86257	0.64134	0.37194	0.20149	0.11804	0.07642	0.0538
16.32	0.98775	0.95762	0.86261	0.64137	0.37192	0.20145	0.118	0.0764	0.05378
16.33	0.98776	0.95764	0.86265	0.64139	0.3719	0.20141	0.11797	0.07637	0.05376
16.34	0.98777	0.95766	0.86269	0.64142	0.37188	0.20138	0.11794	0.07634	0.05373
16.35	0.98778	0.95768	0.86273	0.64145	0.37185	0.20134	0.1179	0.07631	0.05371
16.36	0.98779	0.95771	0.86277	0.64147	0.37183	0.2013	0.11787	0.07629	0.05369
16.37	0.9878	0.95773	0.86281	0.6415	0.37181	0.20126	0.11783	0.07626	0.05367
16.38	0.98781	0.95775	0.86285	0.64152	0.37179	0.20122	0.1178	0.07623	0.05364
16.39	0.98782	0.95777	0.86289	0.64155	0.37176	0.20118	0.11777	0.0762	0.05362
16.4	0.98783	0.9578	0.86293	0.64157	0.37174	0.20115	0.11773	0.07618	0.0536
16.41	0.98784	0.95782	0.86297	0.6416	0.37172	0.20111	0.1177	0.07615	0.05358
16.42	0.98785	0.95784	0.86301	0.64162	0.3717	0.20107	0.11766	0.07612	0.05356
16.43	0.98786	0.95786	0.86305	0.64165	0.37167	0.20103	0.11763	0.0761	0.05353
16.44	0.98787	0.95789	0.86309	0.64167	0.37165	0.201	0.1176	0.07607	0.05351
16.45	0.98787	0.95791	0.86313	0.6417	0.37163	0.20096	0.11756	0.07604	0.05349
16.46	0.98788	0.95793	0.86317	0.64173	0.37161	0.20092	0.11753	0.07601	0.05347
16.47	0.98789	0.95795	0.86321	0.64175	0.37158	0.20088	0.11749	0.07599	0.05345
16.48	0.9879	0.95798	0.86325	0.64178	0.37156	0.20084	0.11746	0.07596	0.05342
16.49	0.98791	0.958	0.86329	0.6418	0.37154	0.20081	0.11743	0.07593	0.0534
16.5	0.98792	0.95802	0.86333	0.64183	0.37152	0.20077	0.11739	0.0759	0.05338
16.51	0.98793	0.95804	0.86337	0.64185	0.3715	0.20073	0.11736	0.07588	0.05336
16.52	0.98794	0.95807	0.86341	0.64188	0.37147	0.20069	0.11733	0.07585	0.05334
16.53	0.98795	0.95809	0.86345	0.6419	0.37145	0.20065	0.11729	0.07582	0.05331
16.54	0.98796	0.95811	0.86349	0.64193	0.37143	0.20062	0.11726	0.0758	0.05329
16.55	0.98797	0.95813	0.86353	0.64195	0.37141	0.20058	0.11722	0.07577	0.05327
16.56	0.98798	0.95816	0.86357	0.64198	0.37138	0.20054	0.11719	0.07574	0.05325
16.57	0.98798	0.95818	0.86361	0.642	0.37136	0.2005	0.11716	0.07571	0.05323
16.58	0.98799	0.9582	0.86365	0.64203	0.37134	0.20047	0.11712	0.07569	0.0532
16.59	0.988	0.95822	0.86369	0.64205	0.37132	0.20043	0.11709	0.07566	0.05318
16.6	0.98801	0.95824	0.86373	0.64208	0.37129	0.20039	0.11706	0.07563	0.05316
16.61	0.98802	0.95827	0.86377	0.6421	0.37127	0.20035	0.11702	0.07561	0.05314
16.62	0.98803	0.95829	0.86381	0.64213	0.37125	0.20032	0.11699	0.07558	0.05312
16.63	0.98804	0.95831	0.86385	0.64215	0.37123	0.20028	0.11696	0.07555	0.0531
16.64	0.98805	0.95833	0.86389	0.64218	0.37121	0.20024	0.11692	0.07552	0.05307
16.65	0.98806	0.95835	0.86393	0.6422	0.37118	0.2002	0.11689	0.0755	0.05305
16.66	0.98807	0.95838	0.86397	0.64223	0.37116	0.20017	0.11686	0.07547	0.05303
16.67	0.98807	0.9584	0.86401	0.64225	0.37114	0.20013	0.11682	0.07544	0.05301
16.68	0.98808	0.95842	0.86405	0.64228	0.37112	0.20009	0.11679	0.07542	0.05299
16.69	0.98809	0.95844	0.86409	0.6423	0.37109	0.20005	0.11676	0.07539	0.05297
16.7	0.9881	0.95846	0.86413	0.64233	0.37107	0.20002	0.11672	0.07536	0.05294
16.71	0.98811	0.95849	0.86417	0.64235	0.37105	0.19998	0.11669	0.07534	0.05292
16.72	0.98812	0.95851	0.8642	0.64238	0.37103	0.19994	0.11666	0.07531	0.0529
16.73	0.98813	0.95853	0.86424	0.6424	0.37101	0.1999	0.11662	0.07528	0.05288
16.74	0.98814	0.95855	0.86428	0.64243	0.37098	0.19987	0.11659	0.07526	0.05286
16.75	0.98815	0.95857	0.86432	0.64245	0.37096	0.19983	0.11656	0.07523	0.05284
16.76	0.98816	0.95859	0.86436	0.64248	0.37094	0.19979	0.11652	0.0752	0.05281
16.77	0.98816	0.95862	0.8644	0.6425	0.37092	0.19975	0.11649	0.07518	0.05279
16.78	0.98817	0.95864	0.86444	0.64253	0.3709	0.19972	0.11646	0.07515	0.05277
16.79	0.98818	0.95866	0.86448	0.64255	0.37087	0.19968	0.11642	0.07512	0.05275
16.8	0.98819	0.95868	0.86452	0.64258	0.37085	0.19964	0.11639	0.0751	0.05273
16.81	0.9882	0.9587	0.86456	0.6426	0.37083	0.19961	0.11636	0.07507	0.05271
16.82	0.98821	0.95872	0.8646	0.64263	0.37081	0.19957	0.11632	0.07504	0.05269
16.83	0.98822	0.95875	0.86464	0.64265	0.37079	0.19953	0.11629	0.07502	0.05266
16.84	0.98823	0.95877	0.86467	0.64268	0.37076	0.19949	0.11626	0.07499	0.05264
16.85	0.98823	0.95879	0.86471	0.6427	0.37074	0.19946	0.11622	0.07496	0.05262
16.86	0.98824	0.95881	0.86475	0.64273	0.37072	0.19942	0.11619	0.07494	0.0526
16.87	0.98825	0.95883	0.86479	0.64275	0.3707	0.19938	0.11616	0.07491	0.05258
16.88	0.98826	0.95885	0.86483	0.64278	0.37068	0.19935	0.11612	0.07488	0.05256
16.89	0.98827	0.95888	0.86487	0.6428	0.37065	0.19931	0.11609	0.07486	0.05254
16.9	0.98828	0.9589	0.86491	0.64283	0.37063	0.19927	0.11606	0.07483	0.05251
16.91	0.98829	0.95892	0.86495	0.64285	0.37061	0.19923	0.11603	0.0748	0.05249
16.92	0.9883	0.95894	0.86499	0.64288	0.37059	0.1992	0.11599	0.07478	0.05247
16.93	0.9883	0.95896	0.86502	0.6429	0.37057	0.19916	0.11596	0.07475	0.05245
16.94	0.98831	0.95898	0.86506	0.64293	0.37054	0.19912	0.11593	0.07472	0.05243
16.95	0.98832	0.959	0.8651	0.64295	0.37052	0.19909	0.11589	0.0747	0.05241
16.96	0.98833	0.95903	0.86514	0.64298	0.3705	0.19905	0.11586	0.07467	0.05239
16.97	0.98834	0.95905	0.86518	0.643	0.37048	0.19901	0.11583	0.07464	0.05237
16.98	0.98835	0.95907	0.86522	0.64303	0.37046	0.19898	0.1158	0.07462	0.05234
16.99	0.98836	0.95909	0.86526	0.64305	0.37043	0.19894	0.11576	0.07459	0.05232
17	0.98837	0.95911	0.86529	0.64308	0.37041	0.1989	0.11573	0.07457	0.0523
17.01	0.98837	0.95913	0.86533	0.6431	0.37039	0.19887	0.1157	0.07454	0.05228
17.02	0.98838	0.95915	0.86537	0.64312	0.37037	0.19883	0.11567	0.07451	0.05226
17.03	0.98839	0.95917	0.86541	0.64315	0.37035	0.19879	0.11563	0.07449	0.05224
17.04	0.9884	0.9592	0.86545	0.64317	0.37032	0.19876	0.1156	0.07446	0.05222
17.05	0.98841	0.95922	0.86549	0.6432	0.3703	0.19872	0.11557	0.07443	0.0522
17.06	0.98842	0.95924	0.86553	0.64322	0.37028	0.19868	0.11553	0.07441	0.05217
17.07	0.98843	0.95926	0.86556	0.64325	0.37026	0.19865	0.1155	0.07438	0.05215
17.08	0.98843	0.95928	0.8656	0.64327	0.37024	0.19861	0.11547	0.07436	0.05213
17.09	0.98844	0.9593	0.86564	0.6433	0.37022	0.19857	0.11544	0.07433	0.05211
17.1	0.98845	0.95932	0.86568	0.64332	0.37019	0.19854	0.1154	0.0743	0.05209
17.11	0.98846	0.95934	0.86572	0.64335	0.37017	0.1985	0.11537	0.07428	0.05207
17.12	0.98847	0.95936	0.86575	0.64337	0.37015	0.19846	0.11534	0.07425	0.05205
17.13	0.98848	0.95939	0.86579	0.6434	0.37013	0.19843	0.11531	0.07422	0.05203
17.14	0.98849	0.95941	0.86583	0.64342	0.37011	0.19839	0.11527	0.0742	0.05201
17.15	0.98849	0.95943	0.86587	0.64344	0.37008	0.19835	0.11524	0.07417	0.05199
17.16	0.9885	0.95945	0.86591	0.64347	0.37006	0.19832	0.11521	0.07415	0.05196
17.17	0.98851	0.95947	0.86595	0.64349	0.37004	0.19828	0.11518	0.07412	0.05194
17.18	0.98852	0.95949	0.86598	0.64352	0.37002	0.19824	0.11514	0.07409	0.05192
17.19	0.98853	0.95951	0.86602	0.64354	0.37	0.19821	0.11511	0.07407	0.0519
17.2	0.98854	0.95953	0.86606	0.64357	0.36998	0.19817	0.11508	0.07404	0.05188
17.21	0.98854	0.95955	0.8661	0.64359	0.36995	0.19813	0.11505	0.07402	0.05186
17.22	0.98855	0.95957	0.86614	0.64362	0.36993	0.1981	0.11502	0.07399	0.05184
17.23	0.98856	0.95959	0.86617	0.64364	0.36991	0.19806	0.11498	0.07396	0.05182
17.24	0.98857	0.95962	0.86621	0.64366	0.36989	0.19802	0.11495	0.07394	0.0518
17.25	0.98858	0.95964	0.86625	0.64369	0.36987	0.19799	0.11492	0.07391	0.05178
17.26	0.98859	0.95966	0.86629	0.64371	0.36985	0.19795	0.11489	0.07389	0.05176
17.27	0.98859	0.95968	0.86632	0.64374	0.36982	0.19792	0.11485	0.07386	0.05174
17.28	0.9886	0.9597	0.86636	0.64376	0.3698	0.19788	0.11482	0.07384	0.05171
17.29	0.98861	0.95972	0.8664	0.64379	0.36978	0.19784	0.11479	0.07381	0.05169
17.3	0.98862	0.95974	0.86644	0.64381	0.36976	0.19781	0.11476	0.07378	0.05167
17.31	0.98863	0.95976	0.86648	0.64384	0.36974	0.19777	0.11473	0.07376	0.05165
17.32	0.98864	0.95978	0.86651	0.64386	0.36972	0.19773	0.11469	0.07373	0.05163
17.33	0.98864	0.9598	0.86655	0.64388	0.3697	0.1977	0.11466	0.07371	0.05161
17.34	0.98865	0.95982	0.86659	0.64391	0.36967	0.19766	0.11463	0.07368	0.05159
17.35	0.98866	0.95984	0.86663	0.64393	0.36965	0.19763	0.1146	0.07365	0.05157
17.36	0.98867	0.95986	0.86666	0.64396	0.36963	0.19759	0.11457	0.07363	0.05155
17.37	0.98868	0.95988	0.8667	0.64398	0.36961	0.19755	0.11453	0.0736	0.05153
17.38	0.98869	0.9599	0.86674	0.64401	0.36959	0.19752	0.1145	0.07358	0.05151
17.39	0.98869	0.95992	0.86678	0.64403	0.36957	0.19748	0.11447	0.07355	0.05149
17.4	0.9887	0.95995	0.86681	0.64405	0.36954	0.19745	0.11444	0.07353	0.05147
17.41	0.98871	0.95997	0.86685	0.64408	0.36952	0.19741	0.11441	0.0735	0.05145
17.42	0.98872	0.95999	0.86689	0.6441	0.3695	0.19737	0.11437	0.07348	0.05143
17.43	0.98873	0.96001	0.86693	0.64413	0.36948	0.19734	0.11434	0.07345	0.05141
17.44	0.98874	0.96003	0.86696	0.64415	0.36946	0.1973	0.11431	0.07342	0.05138
17.45	0.98874	0.96005	0.867	0.64418	0.36944	0.19727	0.11428	0.0734	0.05136
17.46	0.98875	0.96007	0.86704	0.6442	0.36942	0.19723	0.11425	0.07337	0.05134
17.47	0.98876	0.96009	0.86708	0.64422	0.36939	0.19719	0.11421	0.07335	0.05132
17.48	0.98877	0.96011	0.86711	0.64425	0.36937	0.19716	0.11418	0.07332	0.0513
17.49	0.98878	0.96013	0.86715	0.64427	0.36935	0.19712	0.11415	0.0733	0.05128
17.5	0.98878	0.96015	0.86719	0.6443	0.36933	0.19709	0.11412	0.07327	0.05126
17.51	0.98879	0.96017	0.86722	0.64432	0.36931	0.19705	0.11409	0.07325	0.05124
17.52	0.9888	0.96019	0.86726	0.64434	0.36929	0.19701	0.11406	0.07322	0.05122
17.53	0.98881	0.96021	0.8673	0.64437	0.36927	0.19698	0.11402	0.0732	0.0512
17.54	0.98882	0.96023	0.86734	0.64439	0.36924	0.19694	0.11399	0.07317	0.05118
17.55	0.98882	0.96025	0.86737	0.64442	0.36922	0.19691	0.11396	0.07314	0.05116
17.56	0.98883	0.96027	0.86741	0.64444	0.3692	0.19687	0.11393	0.07312	0.05114
17.57	0.98884	0.96029	0.86745	0.64446	0.36918	0.19684	0.1139	0.07309	0.05112
17.58	0.98885	0.96031	0.86748	0.64449	0.36916	0.1968	0.11387	0.07307	0.0511
17.59	0.98886	0.96033	0.86752	0.64451	0.36914	0.19676	0.11383	0.07304	0.05108
17.6	0.98886	0.96035	0.86756	0.64454	0.36912	0.19673	0.1138	0.07302	0.05106
17.61	0.98887	0.96037	0.8676	0.64456	0.36909	0.19669	0.11377	0.07299	0.05104
17.62	0.98888	0.96039	0.86763	0.64458	0.36907	0.19666	0.11374	0.07297	0.05102
17.63	0.98889	0.96041	0.86767	0.64461	0.36905	0.19662	0.11371	0.07294	0.051
17.64	0.9889	0.96043	0.86771	0.64463	0.36903	0.19659	0.11368	0.07292	0.05098
17.65	0.9889	0.96045	0.86774	0.64466	0.36901	0.19655	0.11365	0.07289	0.05096
17.66	0.98891	0.96047	0.86778	0.64468	0.36899	0.19651	0.11361	0.07287	0.05094
17.67	0.98892	0.96049	0.86782	0.6447	0.36897	0.19648	0.11358	0.07284	0.05092
17.68	0.98893	0.96051	0.86785	0.64473	0.36895	0.19644	0.11355	0.07282	0.0509
17.69	0.98894	0.96053	0.86789	0.64475	0.36892	0.19641	0.11352	0.07279	0.05088
17.7	0.98894	0.96055	0.86793	0.64478	0.3689	0.19637	0.11349	0.07277	0.05086
17.71	0.98895	0.96057	0.86796	0.6448	0.36888	0.19634	0.11346	0.07274	0.05084
17.72	0.98896	0.96059	0.868	0.64482	0.36886	0.1963	0.11343	0.07272	0.05082
17.73	0.98897	0.96061	0.86804	0.64485	0.36884	0.19627	0.11339	0.07269	0.0508
17.74	0.98898	0.96063	0.86807	0.64487	0.36882	0.19623	0.11336	0.07267	0.05078
17.75	0.98898	0.96065	0.86811	0.6449	0.3688	0.19619	0.11333	0.07264	0.05076
17.76	0.98899	0.96067	0.86815	0.64492	0.36878	0.19616	0.1133	0.07262	0.05074
17.77	0.989	0.96069	0.86818	0.64494	0.36875	0.19612	0.11327	0.07259	0.05072
17.78	0.98901	0.96071	0.86822	0.64497	0.36873	0.19609	0.11324	0.07257	0.0507
17.79	0.98902	0.96073	0.86826	0.64499	0.36871	0.19605	0.11321	0.07254	0.05068
17.8	0.98902	0.96075	0.86829	0.64502	0.36869	0.19602	0.11318	0.07252	0.05066
17.81	0.98903	0.96077	0.86833	0.64504	0.36867	0.19598	0.11314	0.07249	0.05064
17.82	0.98904	0.96079	0.86837	0.64506	0.36865	0.19595	0.11311	0.07247	0.05062
17.83	0.98905	0.96081	0.8684	0.64509	0.36863	0.19591	0.11308	0.07244	0.0506
17.84	0.98906	0.96083	0.86844	0.64511	0.36861	0.19588	0.11305	0.07242	0.05058
17.85	0.98906	0.96085	0.86847	0.64513	0.36859	0.19584	0.11302	0.07239	0.05056
17.86	0.98907	0.96087	0.86851	0.64516	0.36856	0.19581	0.11299	0.07237	0.05054
17.87	0.98908	0.96089	0.86855	0.64518	0.36854	0.19577	0.11296	0.07234	0.05052
17.88	0.98909	0.96091	0.86858	0.64521	0.36852	0.19574	0.11293	0.07232	0.0505
17.89	0.98909	0.96093	0.86862	0.64523	0.3685	0.1957	0.1129	0.07229	0.05048
17.9	0.9891	0.96095	0.86866	0.64525	0.36848	0.19567	0.11286	0.07227	0.05046
17.91	0.98911	0.96096	0.86869	0.64528	0.36846	0.19563	0.11283	0.07224	0.05044
17.92	0.98912	0.96098	0.86873	0.6453	0.36844	0.1956	0.1128	0.07222	0.05042
17.93	0.98913	0.961	0.86876	0.64532	0.36842	0.19556	0.11277	0.07219	0.0504
17.94	0.98913	0.96102	0.8688	0.64535	0.3684	0.19552	0.11274	0.07217	0.05038
17.95	0.98914	0.96104	0.86884	0.64537	0.36837	0.19549	0.11271	0.07214	0.05036
17.96	0.98915	0.96106	0.86887	0.64539	0.36835	0.19545	0.11268	0.07212	0.05034
17.97	0.98916	0.96108	0.86891	0.64542	0.36833	0.19542	0.11265	0.07209	0.05032
17.98	0.98916	0.9611	0.86895	0.64544	0.36831	0.19538	0.11262	0.07207	0.0503
17.99	0.98917	0.96112	0.86898	0.64547	0.36829	0.19535	0.11259	0.07204	0.05028
18	0.98918	0.96114	0.86902	0.64549	0.36827	0.19531	0.11256	0.07202	0.05026
18.01	0.98919	0.96116	0.86905	0.64551	0.36825	0.19528	0.11252	0.07199	0.05024
18.02	0.98919	0.96118	0.86909	0.64554	0.36823	0.19524	0.11249	0.07197	0.05022
18.03	0.9892	0.9612	0.86913	0.64556	0.36821	0.19521	0.11246	0.07195	0.0502
18.04	0.98921	0.96122	0.86916	0.64558	0.36819	0.19517	0.11243	0.07192	0.05018
18.05	0.98922	0.96124	0.8692	0.64561	0.36816	0.19514	0.1124	0.0719	0.05016
18.06	0.98922	0.96126	0.86923	0.64563	0.36814	0.19511	0.11237	0.07187	0.05014
18.07	0.98923	0.96127	0.86927	0.64565	0.36812	0.19507	0.11234	0.07185	0.05012
18.08	0.98924	0.96129	0.8693	0.64568	0.3681	0.19504	0.11231	0.07182	0.0501
18.09	0.98925	0.96131	0.86934	0.6457	0.36808	0.195	0.11228	0.0718	0.05008
18.1	0.98926	0.96133	0.86938	0.64573	0.36806	0.19497	0.11225	0.07177	0.05006
18.11	0.98926	0.96135	0.86941	0.64575	0.36804	0.19493	0.11222	0.07175	0.05004
18.12	0.98927	0.96137	0.86945	0.64577	0.36802	0.1949	0.11219	0.07173	0.05002
18.13	0.98928	0.96139	0.86948	0.6458	0.368	0.19486	0.11216	0.0717	0.05
18.14	0.98929	0.96141	0.86952	0.64582	0.36798	0.19483	0.11213	0.07168	0.04998
18.15	0.98929	0.96143	0.86955	0.64584	0.36796	0.19479	0.1121	0.07165	0.04996
18.16	0.9893	0.96145	0.86959	0.64587	0.36794	0.19476	0.11206	0.07163	0.04994
18.17	0.98931	0.96147	0.86963	0.64589	0.36791	0.19472	0.11203	0.0716	0.04992
18.18	0.98932	0.96149	0.86966	0.64591	0.36789	0.19469	0.112	0.07158	0.04991
18.19	0.98932	0.9615	0.8697	0.64594	0.36787	0.19465	0.11197	0.07155	0.04989
18.2	0.98933	0.96152	0.86973	0.64596	0.36785	0.19462	0.11194	0.07153	0.04987
18.21	0.98934	0.96154	0.86977	0.64598	0.36783	0.19458	0.11191	0.07151	0.04985
18.22	0.98935	0.96156	0.8698	0.64601	0.36781	0.19455	0.11188	0.07148	0.04983
18.23	0.98935	0.96158	0.86984	0.64603	0.36779	0.19451	0.11185	0.07146	0.04981
18.24	0.98936	0.9616	0.86987	0.64605	0.36777	0.19448	0.11182	0.07143	0.04979
18.25	0.98937	0.96162	0.86991	0.64608	0.36775	0.19445	0.11179	0.07141	0.04977
18.26	0.98938	0.96164	0.86995	0.6461	0.36773	0.19441	0.11176	0.07138	0.04975
18.27	0.98938	0.96166	0.86998	0.64612	0.36771	0.19438	0.11173	0.07136	0.04973
18.28	0.98939	0.96168	0.87002	0.64615	0.36769	0.19434	0.1117	0.07134	0.04971
18.29	0.9894	0.96169	0.87005	0.64617	0.36766	0.19431	0.11167	0.07131	0.04969
18.3	0.98941	0.96171	0.87009	0.64619	0.36764	0.19427	0.11164	0.07129	0.04967
18.31	0.98941	0.96173	0.87012	0.64622	0.36762	0.19424	0.11161	0.07126	0.04965
18.32	0.98942	0.96175	0.87016	0.64624	0.3676	0.1942	0.11158	0.07124	0.04963
18.33	0.98943	0.96177	0.87019	0.64626	0.36758	0.19417	0.11155	0.07122	0.04961
18.34	0.98944	0.96179	0.87023	0.64629	0.36756	0.19414	0.11152	0.07119	0.0496
18.35	0.98944	0.96181	0.87026	0.64631	0.36754	0.1941	0.11149	0.07117	0.04958
18.36	0.98945	0.96183	0.8703	0.64633	0.36752	0.19407	0.11146	0.07114	0.04956
18.37	0.98946	0.96184	0.87033	0.64636	0.3675	0.19403	0.11143	0.07112	0.04954
18.38	0.98946	0.96186	0.87037	0.64638	0.36748	0.194	0.1114	0.07109	0.04952
18.39	0.98947	0.96188	0.8704	0.6464	0.36746	0.19396	0.11137	0.07107	0.0495
18.4	0.98948	0.9619	0.87044	0.64643	0.36744	0.19393	0.11134	0.07105	0.04948
18.41	0.98949	0.96192	0.87047	0.64645	0.36742	0.19389	0.11131	0.07102	0.04946
18.42	0.98949	0.96194	0.87051	0.64647	0.3674	0.19386	0.11128	0.071	0.04944
18.43	0.9895	0.96196	0.87054	0.6465	0.36737	0.19383	0.11125	0.07097	0.04942
18.44	0.98951	0.96198	0.87058	0.64652	0.36735	0.19379	0.11122	0.07095	0.0494
18.45	0.98952	0.96199	0.87061	0.64654	0.36733	0.19376	0.11119	0.07093	0.04938
18.46	0.98952	0.96201	0.87065	0.64657	0.36731	0.19372	0.11116	0.0709	0.04937
18.47	0.98953	0.96203	0.87068	0.64659	0.36729	0.19369	0.11113	0.07088	0.04935
18.48	0.98954	0.96205	0.87072	0.64661	0.36727	0.19366	0.1111	0.07086	0.04933
18.49	0.98955	0.96207	0.87075	0.64663	0.36725	0.19362	0.11107	0.07083	0.04931
18.5	0.98955	0.96209	0.87079	0.64666	0.36723	0.19359	0.11104	0.07081	0.04929
18.51	0.98956	0.96211	0.87082	0.64668	0.36721	0.19355	0.11101	0.07078	0.04927
18.52	0.98957	0.96212	0.87086	0.6467	0.36719	0.19352	0.11098	0.07076	0.04925
18.53	0.98957	0.96214	0.87089	0.64673	0.36717	0.19348	0.11095	0.07074	0.04923
18.54	0.98958	0.96216	0.87093	0.64675	0.36715	0.19345	0.11092	0.07071	0.04921
18.55	0.98959	0.96218	0.87096	0.64677	0.36713	0.19342	0.11089	0.07069	0.04919
18.56	0.9896	0.9622	0.871	0.6468	0.36711	0.19338	0.11086	0.07066	0.04917
18.57	0.9896	0.96222	0.87103	0.64682	0.36709	0.19335	0.11083	0.07064	0.04916
18.58	0.98961	0.96223	0.87107	0.64684	0.36707	0.19331	0.1108	0.07062	0.04914
18.59	0.98962	0.96225	0.8711	0.64687	0.36705	0.19328	0.11077	0.07059	0.04912
18.6	0.98962	0.96227	0.87114	0.64689	0.36703	0.19325	0.11074	0.07057	0.0491
18.61	0.98963	0.96229	0.87117	0.64691	0.367	0.19321	0.11071	0.07055	0.04908
18.62	0.98964	0.96231	0.8712	0.64693	0.36698	0.19318	0.11068	0.07052	0.04906
18.63	0.98965	0.96233	0.87124	0.64696	0.36696	0.19314	0.11065	0.0705	0.04904
18.64	0.98965	0.96234	0.87127	0.64698	0.36694	0.19311	0.11062	0.07047	0.04902
18.65	0.98966	0.96236	0.87131	0.647	0.36692	0.19308	0.11059	0.07045	0.049
18.66	0.98967	0.96238	0.87134	0.64703	0.3669	0.19304	0.11056	0.07043	0.04899
18.67	0.98967	0.9624	0.87138	0.64705	0.36688	0.19301	0.11053	0.0704	0.04897
18.68	0.98968	0.96242	0.87141	0.64707	0.36686	0.19298	0.1105	0.07038	0.04895
18.69	0.98969	0.96244	0.87145	0.6471	0.36684	0.19294	0.11047	0.07036	0.04893
18.7	0.9897	0.96245	0.87148	0.64712	0.36682	0.19291	0.11044	0.07033	0.04891
18.71	0.9897	0.96247	0.87151	0.64714	0.3668	0.19287	0.11041	0.07031	0.04889
18.72	0.98971	0.96249	0.87155	0.64716	0.36678	0.19284	0.11038	0.07029	0.04887
18.73	0.98972	0.96251	0.87158	0.64719	0.36676	0.19281	0.11035	0.07026	0.04885
18.74	0.98972	0.96253	0.87162	0.64721	0.36674	0.19277	0.11032	0.07024	0.04883
18.75	0.98973	0.96254	0.87165	0.64723	0.36672	0.19274	0.11029	0.07022	0.04882
18.76	0.98974	0.96256	0.87169	0.64726	0.3667	0.1927	0.11026	0.07019	0.0488
18.77	0.98975	0.96258	0.87172	0.64728	0.36668	0.19267	0.11023	0.07017	0.04878
18.78	0.98975	0.9626	0.87176	0.6473	0.36666	0.19264	0.1102	0.07014	0.04876
18.79	0.98976	0.96262	0.87179	0.64732	0.36664	0.1926	0.11017	0.07012	0.04874
18.8	0.98977	0.96263	0.87182	0.64735	0.36662	0.19257	0.11015	0.0701	0.04872
18.81	0.98977	0.96265	0.87186	0.64737	0.3666	0.19254	0.11012	0.07007	0.0487
18.82	0.98978	0.96267	0.87189	0.64739	0.36658	0.1925	0.11009	0.07005	0.04868
18.83	0.98979	0.96269	0.87193	0.64742	0.36656	0.19247	0.11006	0.07003	0.04867
18.84	0.98979	0.96271	0.87196	0.64744	0.36654	0.19244	0.11003	0.07	0.04865
18.85	0.9898	0.96272	0.87199	0.64746	0.36651	0.1924	0.11	0.06998	0.04863
18.86	0.98981	0.96274	0.87203	0.64748	0.36649	0.19237	0.10997	0.06996	0.04861
18.87	0.98982	0.96276	0.87206	0.64751	0.36647	0.19233	0.10994	0.06993	0.04859
18.88	0.98982	0.96278	0.8721	0.64753	0.36645	0.1923	0.10991	0.06991	0.04857
18.89	0.98983	0.9628	0.87213	0.64755	0.36643	0.19227	0.10988	0.06989	0.04855
18.9	0.98984	0.96281	0.87216	0.64758	0.36641	0.19223	0.10985	0.06986	0.04854
18.91	0.98984	0.96283	0.8722	0.6476	0.36639	0.1922	0.10982	0.06984	0.04852
18.92	0.98985	0.96285	0.87223	0.64762	0.36637	0.19217	0.10979	0.06982	0.0485
18.93	0.98986	0.96287	0.87227	0.64764	0.36635	0.19213	0.10976	0.06979	0.04848
18.94	0.98986	0.96289	0.8723	0.64767	0.36633	0.1921	0.10973	0.06977	0.04846
18.95	0.98987	0.9629	0.87233	0.64769	0.36631	0.19207	0.10971	0.06975	0.04844
18.96	0.98988	0.96292	0.87237	0.64771	0.36629	0.19203	0.10968	0.06973	0.04842
18.97	0.98989	0.96294	0.8724	0.64773	0.36627	0.192	0.10965	0.0697	0.04841
18.98	0.98989	0.96296	0.87244	0.64776	0.36625	0.19197	0.10962	0.06968	0.04839
18.99	0.9899	0.96297	0.87247	0.64778	0.36623	0.19193	0.10959	0.06966	0.04837
19	0.98991	0.96299	0.8725	0.6478	0.36621	0.1919	0.10956	0.06963	0.04835
19.01	0.98991	0.96301	0.87254	0.64782	0.36619	0.19187	0.10953	0.06961	0.04833
19.02	0.98992	0.96303	0.87257	0.64785	0.36617	0.19183	0.1095	0.06959	0.04831
19.03	0.98993	0.96305	0.8726	0.64787	0.36615	0.1918	0.10947	0.06956	0.0483
19.04	0.98993	0.96306	0.87264	0.64789	0.36613	0.19177	0.10944	0.06954	0.04828
19.05	0.98994	0.96308	0.87267	0.64792	0.36611	0.19173	0.10941	0.06952	0.04826
19.06	0.98995	0.9631	0.87271	0.64794	0.36609	0.1917	0.10938	0.06949	0.04824
19.07	0.98995	0.96312	0.87274	0.64796	0.36607	0.19167	0.10936	0.06947	0.04822
19.08	0.98996	0.96313	0.87277	0.64798	0.36605	0.19163	0.10933	0.06945	0.0482
19.09	0.98997	0.96315	0.87281	0.64801	0.36603	0.1916	0.1093	0.06942	0.04819
19.1	0.98997	0.96317	0.87284	0.64803	0.36601	0.19157	0.10927	0.0694	0.04817
19.11	0.98998	0.96319	0.87287	0.64805	0.36599	0.19153	0.10924	0.06938	0.04815
19.12	0.98999	0.9632	0.87291	0.64807	0.36597	0.1915	0.10921	0.06936	0.04813
19.13	0.98999	0.96322	0.87294	0.6481	0.36595	0.19147	0.10918	0.06933	0.04811
19.14	0.99	0.96324	0.87297	0.64812	0.36593	0.19143	0.10915	0.06931	0.04809
19.15	0.99001	0.96326	0.87301	0.64814	0.36591	0.1914	0.10912	0.06929	0.04808
19.16	0.99002	0.96327	0.87304	0.64816	0.36589	0.19137	0.1091	0.06926	0.04806
19.17	0.99002	0.96329	0.87307	0.64819	0.36587	0.19134	0.10907	0.06924	0.04804
19.18	0.99003	0.96331	0.87311	0.64821	0.36585	0.1913	0.10904	0.06922	0.04802
19.19	0.99004	0.96333	0.87314	0.64823	0.36583	0.19127	0.10901	0.0692	0.048
19.2	0.99004	0.96334	0.87317	0.64825	0.36581	0.19124	0.10898	0.06917	0.04798
19.21	0.99005	0.96336	0.87321	0.64828	0.36579	0.1912	0.10895	0.06915	0.04797
19.22	0.99006	0.96338	0.87324	0.6483	0.36577	0.19117	0.10892	0.06913	0.04795
19.23	0.99006	0.9634	0.87327	0.64832	0.36575	0.19114	0.10889	0.0691	0.04793
19.24	0.99007	0.96341	0.87331	0.64834	0.36573	0.1911	0.10886	0.06908	0.04791
19.25	0.99008	0.96343	0.87334	0.64837	0.36571	0.19107	0.10884	0.06906	0.04789
19.26	0.99008	0.96345	0.87337	0.64839	0.36569	0.19104	0.10881	0.06904	0.04788
19.27	0.99009	0.96347	0.87341	0.64841	0.36567	0.19101	0.10878	0.06901	0.04786
19.28	0.9901	0.96348	0.87344	0.64843	0.36565	0.19097	0.10875	0.06899	0.04784
19.29	0.9901	0.9635	0.87347	0.64846	0.36563	0.19094	0.10872	0.06897	0.04782
19.3	0.99011	0.96352	0.87351	0.64848	0.36561	0.19091	0.10869	0.06894	0.0478
19.31	0.99012	0.96354	0.87354	0.6485	0.36559	0.19087	0.10866	0.06892	0.04778
19.32	0.99012	0.96355	0.87357	0.64852	0.36557	0.19084	0.10864	0.0689	0.04777
19.33	0.99013	0.96357	0.87361	0.64855	0.36555	0.19081	0.10861	0.06888	0.04775
19.34	0.99014	0.96359	0.87364	0.64857	0.36553	0.19077	0.10858	0.06885	0.04773
19.35	0.99014	0.9636	0.87367	0.64859	0.36551	0.19074	0.10855	0.06883	0.04771
19.36	0.99015	0.96362	0.87371	0.64861	0.36549	0.19071	0.10852	0.06881	0.04769
19.37	0.99016	0.96364	0.87374	0.64863	0.36547	0.19068	0.10849	0.06879	0.04768
19.38	0.99016	0.96366	0.87377	0.64866	0.36545	0.19064	0.10846	0.06876	0.04766
19.39	0.99017	0.96367	0.87381	0.64868	0.36543	0.19061	0.10844	0.06874	0.04764
19.4	0.99018	0.96369	0.87384	0.6487	0.36541	0.19058	0.10841	0.06872	0.04762
19.41	0.99018	0.96371	0.87387	0.64872	0.36539	0.19055	0.10838	0.0687	0.0476
19.42	0.99019	0.96372	0.8739	0.64875	0.36537	0.19051	0.10835	0.06867	0.04759
19.43	0.9902	0.96374	0.87394	0.64877	0.36535	0.19048	0.10832	0.06865	0.04757
19.44	0.9902	0.96376	0.87397	0.64879	0.36533	0.19045	0.10829	0.06863	0.04755
19.45	0.99021	0.96378	0.874	0.64881	0.36531	0.19041	0.10826	0.06861	0.04753
19.46	0.99022	0.96379	0.87404	0.64884	0.36529	0.19038	0.10824	0.06858	0.04752
19.47	0.99022	0.96381	0.87407	0.64886	0.36527	0.19035	0.10821	0.06856	0.0475
19.48	0.99023	0.96383	0.8741	0.64888	0.36525	0.19032	0.10818	0.06854	0.04748
19.49	0.99023	0.96384	0.87413	0.6489	0.36523	0.19028	0.10815	0.06852	0.04746
19.5	0.99024	0.96386	0.87417	0.64892	0.36521	0.19025	0.10812	0.06849	0.04744
19.51	0.99025	0.96388	0.8742	0.64895	0.36519	0.19022	0.10809	0.06847	0.04743
19.52	0.99025	0.9639	0.87423	0.64897	0.36517	0.19019	0.10807	0.06845	0.04741
19.53	0.99026	0.96391	0.87427	0.64899	0.36515	0.19015	0.10804	0.06843	0.04739
19.54	0.99027	0.96393	0.8743	0.64901	0.36513	0.19012	0.10801	0.0684	0.04737
19.55	0.99027	0.96395	0.87433	0.64904	0.36511	0.19009	0.10798	0.06838	0.04735
19.56	0.99028	0.96396	0.87436	0.64906	0.36509	0.19006	0.10795	0.06836	0.04734
19.57	0.99029	0.96398	0.8744	0.64908	0.36507	0.19002	0.10792	0.06834	0.04732
19.58	0.99029	0.964	0.87443	0.6491	0.36505	0.18999	0.1079	0.06831	0.0473
19.59	0.9903	0.96401	0.87446	0.64912	0.36503	0.18996	0.10787	0.06829	0.04728
19.6	0.99031	0.96403	0.87449	0.64915	0.36501	0.18993	0.10784	0.06827	0.04727
19.61	0.99031	0.96405	0.87453	0.64917	0.36499	0.18989	0.10781	0.06825	0.04725
19.62	0.99032	0.96406	0.87456	0.64919	0.36497	0.18986	0.10778	0.06822	0.04723
19.63	0.99033	0.96408	0.87459	0.64921	0.36495	0.18983	0.10776	0.0682	0.04721
19.64	0.99033	0.9641	0.87462	0.64923	0.36493	0.1898	0.10773	0.06818	0.04719
19.65	0.99034	0.96411	0.87466	0.64926	0.36491	0.18976	0.1077	0.06816	0.04718
19.66	0.99034	0.96413	0.87469	0.64928	0.36489	0.18973	0.10767	0.06814	0.04716
19.67	0.99035	0.96415	0.87472	0.6493	0.36487	0.1897	0.10764	0.06811	0.04714
19.68	0.99036	0.96416	0.87475	0.64932	0.36485	0.18967	0.10761	0.06809	0.04712
19.69	0.99036	0.96418	0.87479	0.64935	0.36483	0.18963	0.10759	0.06807	0.04711
19.7	0.99037	0.9642	0.87482	0.64937	0.36481	0.1896	0.10756	0.06805	0.04709
19.71	0.99038	0.96422	0.87485	0.64939	0.36479	0.18957	0.10753	0.06802	0.04707
19.72	0.99038	0.96423	0.87488	0.64941	0.36478	0.18954	0.1075	0.068	0.04705
19.73	0.99039	0.96425	0.87492	0.64943	0.36476	0.18951	0.10747	0.06798	0.04704
19.74	0.9904	0.96427	0.87495	0.64946	0.36474	0.18947	0.10745	0.06796	0.04702
19.75	0.9904	0.96428	0.87498	0.64948	0.36472	0.18944	0.10742	0.06794	0.047
19.76	0.99041	0.9643	0.87501	0.6495	0.3647	0.18941	0.10739	0.06791	0.04698
19.77	0.99042	0.96432	0.87504	0.64952	0.36468	0.18938	0.10736	0.06789	0.04697
19.78	0.99042	0.96433	0.87508	0.64954	0.36466	0.18934	0.10733	0.06787	0.04695
19.79	0.99043	0.96435	0.87511	0.64957	0.36464	0.18931	0.10731	0.06785	0.04693
19.8	0.99043	0.96437	0.87514	0.64959	0.36462	0.18928	0.10728	0.06783	0.04691
19.81	0.99044	0.96438	0.87517	0.64961	0.3646	0.18925	0.10725	0.0678	0.0469
19.82	0.99045	0.9644	0.87521	0.64963	0.36458	0.18922	0.10722	0.06778	0.04688
19.83	0.99045	0.96441	0.87524	0.64965	0.36456	0.18918	0.10719	0.06776	0.04686
19.84	0.99046	0.96443	0.87527	0.64968	0.36454	0.18915	0.10717	0.06774	0.04684
19.85	0.99047	0.96445	0.8753	0.6497	0.36452	0.18912	0.10714	0.06772	0.04683
19.86	0.99047	0.96446	0.87533	0.64972	0.3645	0.18909	0.10711	0.06769	0.04681
19.87	0.99048	0.96448	0.87537	0.64974	0.36448	0.18906	0.10708	0.06767	0.04679
19.88	0.99048	0.9645	0.8754	0.64976	0.36446	0.18902	0.10706	0.06765	0.04677
19.89	0.99049	0.96451	0.87543	0.64979	0.36444	0.18899	0.10703	0.06763	0.04676
19.9	0.9905	0.96453	0.87546	0.64981	0.36442	0.18896	0.107	0.06761	0.04674
19.91	0.9905	0.96455	0.87549	0.64983	0.3644	0.18893	0.10697	0.06758	0.04672
19.92	0.99051	0.96456	0.87553	0.64985	0.36438	0.18889	0.10694	0.06756	0.0467
19.93	0.99052	0.96458	0.87556	0.64987	0.36436	0.18886	0.10692	0.06754	0.04669
19.94	0.99052	0.9646	0.87559	0.64989	0.36434	0.18883	0.10689	0.06752	0.04667
19.95	0.99053	0.96461	0.87562	0.64992	0.36432	0.1888	0.10686	0.0675	0.04665
19.96	0.99053	0.96463	0.87565	0.64994	0.3643	0.18877	0.10683	0.06747	0.04663
19.97	0.99054	0.96465	0.87569	0.64996	0.36429	0.18874	0.10681	0.06745	0.04662
[truncated: 8,003 more rows]

## Sheet: Fig.2 B2
Time	OD600	OD600	OD600	OD600	OD600	OD600	OD600	OD600	OD600
h
Time	μm2=0.2	μm2=0.4	μm2=0.6	μm2=0.8	μm2=1.0	μm2=1.2	μm2=1.4	μm2=1.6	μm2=1.8
0.01	0.60132	0.60132	0.60132	0.60132	0.60132	0.60132	0.60132	0.60132	0.60132
0.02	0.60266	0.60268	0.6027	0.60272	0.60274	0.60276	0.60278	0.6028	0.60282
0.03	0.60403	0.60409	0.60414	0.6042	0.60426	0.60431	0.60437	0.60443	0.60448
0.04	0.60542	0.60554	0.60565	0.60576	0.60586	0.60597	0.60608	0.60619	0.6063
0.05	0.60684	0.60702	0.6072	0.60738	0.60756	0.60773	0.60791	0.60808	0.60826
0.06	0.60828	0.60854	0.60881	0.60907	0.60933	0.60959	0.60984	0.6101	0.61035
0.07	0.60974	0.6101	0.61046	0.61082	0.61118	0.61153	0.61188	0.61223	0.61257
0.08	0.61122	0.61169	0.61216	0.61263	0.61309	0.61355	0.61401	0.61446	0.61491
0.09	0.61271	0.61331	0.61391	0.6145	0.61508	0.61566	0.61623	0.6168	0.61736
0.1	0.61423	0.61497	0.6157	0.61642	0.61714	0.61784	0.61854	0.61924	0.61992
0.11	0.61577	0.61665	0.61753	0.6184	0.61925	0.6201	0.62094	0.62177	0.62258
0.12	0.61732	0.61837	0.6194	0.62042	0.62143	0.62243	0.62341	0.62439	0.62535
0.13	0.6189	0.62011	0.62131	0.62249	0.62367	0.62482	0.62597	0.62709	0.62821
0.14	0.62048	0.62188	0.62326	0.62462	0.62596	0.62728	0.62859	0.62989	0.63116
0.15	0.62209	0.62367	0.62524	0.62678	0.62831	0.62981	0.63129	0.63276	0.6342
0.16	0.62371	0.62549	0.62725	0.62899	0.63071	0.6324	0.63407	0.63571	0.63733
0.17	0.62535	0.62734	0.6293	0.63124	0.63316	0.63504	0.63691	0.63874	0.64055
0.18	0.62701	0.62921	0.63139	0.63354	0.63566	0.63775	0.63981	0.64184	0.64385
0.19	0.62868	0.63111	0.6335	0.63587	0.63821	0.64051	0.64279	0.64502	0.64723
0.2	0.63036	0.63302	0.63565	0.63825	0.64081	0.64333	0.64582	0.64827	0.65069
0.21	0.63206	0.63496	0.63783	0.64066	0.64345	0.64621	0.64892	0.6516	0.65423
0.22	0.63378	0.63693	0.64004	0.64311	0.64615	0.64914	0.65209	0.65499	0.65785
0.23	0.6355	0.63891	0.64228	0.6456	0.64888	0.65212	0.65531	0.65845	0.66154
0.24	0.63725	0.64092	0.64454	0.64813	0.65166	0.65515	0.65859	0.66198	0.66531
0.25	0.639	0.64294	0.64684	0.65069	0.65449	0.65824	0.66193	0.66557	0.66915
0.26	0.64078	0.64499	0.64916	0.65328	0.65736	0.66137	0.66533	0.66923	0.67307
0.27	0.64256	0.64706	0.65151	0.65591	0.66027	0.66456	0.66879	0.67296	0.67706
0.28	0.64436	0.64915	0.65389	0.65858	0.66322	0.6678	0.67231	0.67675	0.68113
0.29	0.64617	0.65125	0.65629	0.66128	0.66621	0.67108	0.67588	0.68061	0.68526
0.3	0.648	0.65338	0.65872	0.66401	0.66924	0.67441	0.67951	0.68453	0.68947
0.31	0.64983	0.65553	0.66118	0.66678	0.67232	0.67779	0.68319	0.68852	0.69375
0.32	0.65169	0.65769	0.66366	0.66957	0.67543	0.68122	0.68693	0.69256	0.6981
0.33	0.65355	0.65988	0.66616	0.6724	0.67858	0.68469	0.69073	0.69668	0.70253
0.34	0.65543	0.66208	0.6687	0.67526	0.68178	0.68822	0.69458	0.70085	0.70702
0.35	0.65732	0.6643	0.67125	0.67816	0.68501	0.69179	0.69848	0.70509	0.71158
0.36	0.65922	0.66654	0.67383	0.68108	0.68828	0.6954	0.70244	0.70939	0.71622
0.37	0.66113	0.6688	0.67644	0.68404	0.69158	0.69906	0.70645	0.71375	0.72093
0.38	0.66306	0.67107	0.67906	0.68702	0.69493	0.70277	0.71052	0.71817	0.7257
0.39	0.665	0.67336	0.68172	0.69004	0.69831	0.70652	0.71464	0.72266	0.73055
0.4	0.66695	0.67567	0.68439	0.69309	0.70174	0.71032	0.71882	0.72721	0.73547
0.41	0.66891	0.678	0.68709	0.69616	0.7052	0.71416	0.72305	0.73182	0.74046
0.42	0.67089	0.68035	0.68981	0.69927	0.70869	0.71805	0.72733	0.7365	0.74552
0.43	0.67288	0.68271	0.69256	0.70241	0.71223	0.72199	0.73167	0.74123	0.75066
0.44	0.67488	0.68509	0.69533	0.70558	0.7158	0.72597	0.73606	0.74603	0.75586
0.45	0.67689	0.68748	0.69812	0.70877	0.71941	0.73	0.7405	0.7509	0.76114
0.46	0.67891	0.68989	0.70093	0.712	0.72305	0.73407	0.745	0.75583	0.76649
0.47	0.68095	0.69232	0.70377	0.71525	0.72674	0.73819	0.74956	0.76082	0.77192
0.48	0.683	0.69477	0.70663	0.71854	0.73046	0.74235	0.75417	0.76587	0.77742
0.49	0.68506	0.69723	0.70951	0.72185	0.73421	0.74656	0.75883	0.77099	0.78299
0.5	0.68713	0.69971	0.71241	0.72519	0.73801	0.75081	0.76355	0.77617	0.78863
0.51	0.68921	0.70221	0.71534	0.72857	0.74184	0.75511	0.76832	0.78142	0.79435
0.52	0.69131	0.70472	0.71829	0.73197	0.74571	0.75945	0.77315	0.78673	0.80015
0.53	0.69341	0.70725	0.72126	0.7354	0.74961	0.76385	0.77803	0.79211	0.80602
0.54	0.69553	0.70979	0.72425	0.73886	0.75355	0.76828	0.78297	0.79756	0.81196
0.55	0.69766	0.71235	0.72726	0.74234	0.75753	0.77277	0.78797	0.80307	0.81798
0.56	0.6998	0.71493	0.7303	0.74586	0.76155	0.7773	0.79302	0.80865	0.82408
0.57	0.70196	0.71752	0.73336	0.74941	0.7656	0.78187	0.79813	0.81429	0.83026
0.58	0.70412	0.72013	0.73643	0.75298	0.76969	0.78649	0.80329	0.82	0.83652
0.59	0.7063	0.72275	0.73954	0.75658	0.77382	0.79116	0.80852	0.82578	0.84285
0.6	0.70849	0.72539	0.74266	0.76022	0.77799	0.79588	0.8138	0.83163	0.84926
0.61	0.71069	0.72805	0.7458	0.76388	0.78219	0.80064	0.81913	0.83755	0.85576
0.62	0.7129	0.73072	0.74897	0.76757	0.78643	0.80546	0.82453	0.84353	0.86233
0.63	0.71512	0.73341	0.75216	0.77129	0.79071	0.81031	0.82998	0.84959	0.86899
0.64	0.71735	0.73611	0.75537	0.77504	0.79503	0.81522	0.8355	0.85571	0.87572
0.65	0.7196	0.73883	0.7586	0.77882	0.79938	0.82018	0.84107	0.86191	0.88254
0.66	0.72186	0.74157	0.76185	0.78262	0.80377	0.82518	0.8467	0.86818	0.88945
0.67	0.72413	0.74432	0.76513	0.78646	0.8082	0.83023	0.85239	0.87452	0.89643
0.68	0.72641	0.74709	0.76842	0.79032	0.81267	0.83533	0.85815	0.88093	0.90351
0.69	0.7287	0.74987	0.77174	0.79422	0.81718	0.84048	0.86396	0.88742	0.91066
0.7	0.73101	0.75267	0.77508	0.79814	0.82173	0.84568	0.86983	0.89398	0.91791
0.71	0.73332	0.75548	0.77844	0.8021	0.82631	0.85093	0.87577	0.90062	0.92524
0.72	0.73565	0.75831	0.78183	0.80608	0.83093	0.85623	0.88177	0.90733	0.93265
0.73	0.73799	0.76116	0.78523	0.81009	0.8356	0.86158	0.88783	0.91411	0.94016
0.74	0.74034	0.76402	0.78866	0.81413	0.8403	0.86698	0.89396	0.92097	0.94776
0.75	0.7427	0.7669	0.79211	0.8182	0.84504	0.87243	0.90014	0.92791	0.95544
0.76	0.74508	0.76979	0.79558	0.82231	0.84982	0.87793	0.9064	0.93493	0.96322
0.77	0.74746	0.7727	0.79907	0.82644	0.85465	0.88349	0.91271	0.94203	0.97109
0.78	0.74986	0.77563	0.80258	0.8306	0.85951	0.88909	0.9191	0.9492	0.97905
0.79	0.75227	0.77857	0.80612	0.83479	0.86441	0.89475	0.92554	0.95645	0.9871
0.8	0.75469	0.78153	0.80968	0.83901	0.86935	0.90046	0.93206	0.96379	0.99525
0.81	0.75712	0.7845	0.81326	0.84326	0.87434	0.90623	0.93864	0.9712	1.0035
0.82	0.75957	0.78749	0.81686	0.84755	0.87936	0.91205	0.94529	0.9787	1.01184
0.83	0.76203	0.79049	0.82048	0.85186	0.88443	0.91792	0.95201	0.98628	1.02027
0.84	0.76449	0.79351	0.82413	0.8562	0.88953	0.92385	0.95879	0.99395	1.02881
0.85	0.76698	0.79655	0.8278	0.86058	0.89468	0.92983	0.96565	1.00169	1.03744
0.86	0.76947	0.7996	0.83149	0.86498	0.89987	0.93586	0.97257	1.00953	1.04617
0.87	0.77197	0.80267	0.8352	0.86942	0.90511	0.94195	0.97957	1.01745	1.05501
0.88	0.77449	0.80575	0.83894	0.87389	0.91038	0.9481	0.98663	1.02545	1.06394
0.89	0.77702	0.80886	0.84269	0.87839	0.9157	0.9543	0.99377	1.03354	1.07298
0.9	0.77956	0.81197	0.84647	0.88292	0.92106	0.96056	1.00098	1.04172	1.08211
0.91	0.78211	0.8151	0.85028	0.88748	0.92646	0.96688	1.00826	1.04999	1.09136
0.92	0.78467	0.81825	0.8541	0.89207	0.93191	0.97326	1.01561	1.05835	1.10071
0.93	0.78725	0.82142	0.85795	0.8967	0.9374	0.97969	1.02304	1.0668	1.11016
0.94	0.78984	0.8246	0.86182	0.90135	0.94294	0.98618	1.03055	1.07534	1.11972
0.95	0.79244	0.8278	0.86571	0.90604	0.94852	0.99273	1.03813	1.08398	1.12939
0.96	0.79505	0.83101	0.86963	0.91076	0.95414	0.99934	1.04578	1.09271	1.13917
0.97	0.79768	0.83424	0.87357	0.91552	0.95981	1.00601	1.05352	1.10153	1.14905
0.98	0.80031	0.83749	0.87753	0.92031	0.96552	1.01274	1.06133	1.11044	1.15905
0.99	0.80296	0.84075	0.88152	0.92512	0.97128	1.01953	1.06921	1.11946	1.16916
1	0.80563	0.84403	0.88553	0.92998	0.97709	1.02638	1.07718	1.12856	1.17938
1.01	0.8083	0.84732	0.88956	0.93486	0.98294	1.0333	1.08523	1.13777	1.18971
1.02	0.81099	0.85063	0.89361	0.93978	0.98883	1.04027	1.09336	1.14708	1.20016
1.03	0.81369	0.85396	0.89769	0.94473	0.99478	1.04731	1.10156	1.15648	1.21072
1.04	0.8164	0.85731	0.90179	0.94972	1.00077	1.05441	1.10985	1.16598	1.2214
1.05	0.81912	0.86067	0.90592	0.95473	1.00681	1.06158	1.11823	1.17559	1.2322
1.06	0.82186	0.86405	0.91007	0.95979	1.01289	1.06881	1.12668	1.1853	1.24311
1.07	0.82461	0.86744	0.91424	0.96487	1.01902	1.07611	1.13522	1.19511	1.25415
1.08	0.82737	0.87085	0.91843	0.96999	1.0252	1.08347	1.14385	1.20503	1.2653
1.09	0.83015	0.87428	0.92265	0.97515	1.03143	1.09089	1.15256	1.21505	1.27657
1.1	0.83293	0.87773	0.9269	0.98034	1.03771	1.09839	1.16135	1.22517	1.28797
1.11	0.83573	0.88119	0.93117	0.98556	1.04404	1.10595	1.17024	1.23541	1.29949
1.12	0.83855	0.88467	0.93546	0.99082	1.05042	1.11358	1.17921	1.24575	1.31113
1.13	0.84137	0.88816	0.93978	0.99612	1.05685	1.12127	1.18827	1.2562	1.32289
1.14	0.84421	0.89168	0.94412	1.00145	1.06332	1.12904	1.19742	1.26676	1.33478
1.15	0.84706	0.89521	0.94848	1.00681	1.06985	1.13687	1.20666	1.27743	1.3468
1.16	0.84993	0.89875	0.95287	1.01221	1.07643	1.14478	1.21599	1.28822	1.35894
1.17	0.8528	0.90232	0.95728	1.01765	1.08306	1.15275	1.22542	1.29911	1.37121
1.18	0.85569	0.9059	0.96172	1.02312	1.08975	1.1608	1.23494	1.31012	1.38361
1.19	0.8586	0.9095	0.96619	1.02863	1.09648	1.16892	1.24455	1.32125	1.39613
1.2	0.86151	0.91311	0.97068	1.03418	1.10327	1.17711	1.25426	1.33249	1.40879
1.21	0.86444	0.91675	0.97519	1.03976	1.11011	1.18537	1.26406	1.34385	1.42158
1.22	0.86739	0.9204	0.97973	1.04538	1.117	1.19371	1.27396	1.35533	1.4345
1.23	0.87034	0.92407	0.98429	1.05104	1.12395	1.20212	1.28395	1.36692	1.44755
1.24	0.87331	0.92775	0.98888	1.05673	1.13095	1.21061	1.29405	1.37863	1.46073
1.25	0.8763	0.93145	0.9935	1.06246	1.138	1.21917	1.30424	1.39047	1.47405
1.26	0.87929	0.93518	0.99814	1.06823	1.14511	1.22781	1.31454	1.40243	1.4875
1.27	0.8823	0.93891	1.0028	1.07404	1.15228	1.23653	1.32493	1.41451	1.50109
1.28	0.88533	0.94267	1.00749	1.07988	1.1595	1.24532	1.33543	1.42671	1.51481
1.29	0.88836	0.94645	1.01221	1.08577	1.16678	1.2542	1.34603	1.43904	1.52866
1.3	0.89141	0.95024	1.01695	1.09169	1.17411	1.26315	1.35674	1.4515	1.54265
1.31	0.89448	0.95405	1.02172	1.09765	1.1815	1.27218	1.36755	1.46408	1.55678
1.32	0.89755	0.95788	1.02652	1.10365	1.18895	1.28129	1.37846	1.47679	1.57105
1.33	0.90065	0.96172	1.03134	1.10969	1.19645	1.29048	1.38948	1.48963	1.58545
1.34	0.90375	0.96559	1.03619	1.11577	1.20402	1.29976	1.40061	1.5026	1.59999
1.35	0.90687	0.96947	1.04106	1.12189	1.21164	1.30912	1.41185	1.5157	1.61467
1.36	0.91	0.97337	1.04596	1.12805	1.21932	1.31856	1.4232	1.52893	1.62948
1.37	0.91315	0.97729	1.05089	1.13425	1.22706	1.32808	1.43466	1.5423	1.64444
1.38	0.91631	0.98123	1.05585	1.14049	1.23486	1.33769	1.44623	1.55579	1.65953
1.39	0.91949	0.98519	1.06083	1.14677	1.24272	1.34738	1.45792	1.56943	1.67476
1.4	0.92268	0.98916	1.06584	1.15309	1.25064	1.35717	1.46972	1.5832	1.69013
1.41	0.92588	0.99315	1.07087	1.15945	1.25863	1.36703	1.48163	1.5971	1.70564
1.42	0.9291	0.99717	1.07594	1.16585	1.26667	1.37699	1.49366	1.61115	1.72129
1.43	0.93233	1.0012	1.08103	1.1723	1.27478	1.38703	1.50581	1.62533	1.73708
1.44	0.93558	1.00525	1.08615	1.17879	1.28295	1.39717	1.51807	1.63965	1.753
1.45	0.93884	1.00932	1.09129	1.18532	1.29118	1.40739	1.53045	1.65411	1.76906
1.46	0.94211	1.0134	1.09647	1.19189	1.29948	1.41771	1.54296	1.66871	1.78526
1.47	0.9454	1.01751	1.10167	1.1985	1.30784	1.42811	1.55558	1.68345	1.8016
1.48	0.94871	1.02164	1.1069	1.20516	1.31627	1.43861	1.56833	1.69834	1.81807
1.49	0.95203	1.02578	1.11216	1.21186	1.32476	1.44921	1.5812	1.71337	1.83468
1.5	0.95536	1.02994	1.11744	1.21861	1.33332	1.45989	1.59419	1.72855	1.85143
1.51	0.95871	1.03413	1.12276	1.2254	1.34194	1.47068	1.60731	1.74387	1.86831
1.52	0.96207	1.03833	1.1281	1.23223	1.35063	1.48155	1.62056	1.75933	1.88532
1.53	0.96545	1.04255	1.13347	1.23911	1.35939	1.49253	1.63394	1.77494	1.90246
1.54	0.96884	1.04679	1.13888	1.24603	1.36821	1.5036	1.64744	1.7907	1.91974
1.55	0.97225	1.05106	1.14431	1.25299	1.3771	1.51477	1.66107	1.80661	1.93715
1.56	0.97567	1.05534	1.14977	1.26001	1.38607	1.52604	1.67484	1.82266	1.95469
1.57	0.97911	1.05964	1.15525	1.26706	1.3951	1.53741	1.68873	1.83887	1.97236
1.58	0.98256	1.06396	1.16077	1.27417	1.4042	1.54889	1.70276	1.85522	1.99015
1.59	0.98603	1.0683	1.16632	1.28132	1.41337	1.56046	1.71692	1.87173	2.00807
1.6	0.98951	1.07266	1.1719	1.28851	1.42262	1.57214	1.73122	1.88838	2.02611
1.61	0.99301	1.07704	1.17751	1.29575	1.43193	1.58392	1.74566	1.90519	2.04428
1.62	0.99653	1.08144	1.18314	1.30304	1.44132	1.59581	1.76023	1.92215	2.06257
1.63	1.00006	1.08586	1.18881	1.31038	1.45078	1.6078	1.77495	1.93926	2.08097
1.64	1.0036	1.0903	1.19451	1.31776	1.46031	1.6199	1.7898	1.95652	2.09949
1.65	1.00716	1.09476	1.20024	1.32519	1.46992	1.6321	1.80479	1.97393	2.11813
1.66	1.01074	1.09925	1.206	1.33267	1.4796	1.64442	1.81992	1.9915	2.13688
1.67	1.01433	1.10375	1.21179	1.3402	1.48936	1.65684	1.8352	2.00922	2.15574
1.68	1.01794	1.10827	1.21761	1.34777	1.49919	1.66938	1.85063	2.0271	2.17471
1.69	1.02156	1.11282	1.22346	1.3554	1.5091	1.68202	1.86619	2.04512	2.19378
1.7	1.0252	1.11738	1.22934	1.36307	1.51908	1.69478	1.88191	2.06331	2.21295
1.71	1.02886	1.12197	1.23525	1.3708	1.52915	1.70765	1.89777	2.08164	2.23223
1.72	1.03253	1.12657	1.2412	1.37857	1.53929	1.72064	1.91378	2.10013	2.2516
1.73	1.03622	1.1312	1.24718	1.3864	1.54951	1.73374	1.92994	2.11877	2.27107
1.74	1.03992	1.13585	1.25318	1.39427	1.5598	1.74696	1.94625	2.13756	2.29063
1.75	1.04364	1.14052	1.25923	1.4022	1.57018	1.7603	1.96272	2.1565	2.31027
1.76	1.04738	1.14521	1.2653	1.41017	1.58064	1.77376	1.97934	2.1756	2.33
1.77	1.05113	1.14992	1.2714	1.4182	1.59118	1.78733	1.99611	2.19485	2.34982
1.78	1.0549	1.15465	1.27754	1.42628	1.60181	1.80103	2.01303	2.21425	2.36971
1.79	1.05869	1.15941	1.28371	1.43441	1.61251	1.81484	2.03012	2.2338	2.38968
1.8	1.06249	1.16419	1.28991	1.4426	1.6233	1.82878	2.04736	2.2535	2.40972
1.81	1.06631	1.16899	1.29615	1.45084	1.63417	1.84285	2.06476	2.27334	2.42984
1.82	1.07015	1.17381	1.30242	1.45913	1.64513	1.85704	2.08232	2.29334	2.45001
1.83	1.074	1.17865	1.30872	1.46747	1.65617	1.87135	2.10004	2.31348	2.47025
1.84	1.07787	1.18351	1.31505	1.47587	1.6673	1.88579	2.11792	2.33377	2.49055
1.85	1.08176	1.1884	1.32142	1.48433	1.67851	1.90037	2.13596	2.35421	2.51091
1.86	1.08566	1.19331	1.32782	1.49283	1.68982	1.91507	2.15417	2.37478	2.53132
1.87	1.08958	1.19824	1.33426	1.5014	1.70121	1.9299	2.17254	2.3955	2.55178
1.88	1.09352	1.20319	1.34073	1.51001	1.71269	1.94486	2.19107	2.41636	2.57228
1.89	1.09747	1.20817	1.34723	1.51869	1.72425	1.95995	2.20978	2.43736	2.59283
1.9	1.10144	1.21317	1.35377	1.52742	1.73591	1.97518	2.22865	2.4585	2.61341
1.91	1.10543	1.21819	1.36035	1.5362	1.74766	1.99055	2.24769	2.47977	2.63404
1.92	1.10944	1.22323	1.36695	1.54505	1.7595	2.00605	2.26689	2.50117	2.6547
1.93	1.11347	1.2283	1.3736	1.55395	1.77143	2.02169	2.28627	2.52271	2.67539
1.94	1.11751	1.23338	1.38027	1.5629	1.78346	2.03746	2.30582	2.54438	2.69611
1.95	1.12157	1.2385	1.38699	1.57192	1.79558	2.05338	2.32554	2.56617	2.71686
1.96	1.12565	1.24363	1.39373	1.58099	1.8078	2.06944	2.34543	2.58809	2.73763
1.97	1.12974	1.24879	1.40052	1.59012	1.82011	2.08564	2.3655	2.61013	2.75842
1.98	1.13385	1.25397	1.40734	1.59931	1.83251	2.10198	2.38574	2.63229	2.77924
1.99	1.13799	1.25918	1.41419	1.60857	1.84501	2.11847	2.40615	2.65457	2.80008
2	1.14213	1.26441	1.42108	1.61788	1.85761	2.1351	2.42674	2.67696	2.82093
2.01	1.1463	1.26966	1.42801	1.62725	1.87031	2.15188	2.4475	2.69946	2.8418
2.02	1.15049	1.27493	1.43498	1.63668	1.88311	2.16881	2.46844	2.72207	2.86268
2.03	1.15469	1.28023	1.44198	1.64617	1.89601	2.18589	2.48956	2.74478	2.88358
2.04	1.15891	1.28556	1.44901	1.65572	1.90901	2.20312	2.51085	2.7676	2.9045
2.05	1.16316	1.2909	1.45609	1.66534	1.92211	2.2205	2.53232	2.79051	2.92542
2.06	1.16741	1.29627	1.4632	1.67502	1.93531	2.23803	2.55397	2.81352	2.94637
2.07	1.17169	1.30167	1.47035	1.68476	1.94862	2.25572	2.5758	2.83662	2.96732
2.08	1.17599	1.30709	1.47754	1.69456	1.96203	2.27357	2.59781	2.85981	2.98829
2.09	1.1803	1.31253	1.48476	1.70443	1.97555	2.29157	2.61999	2.88308	3.00928
2.1	1.18464	1.318	1.49202	1.71436	1.98917	2.30973	2.64236	2.90643	3.03028
2.11	1.18899	1.3235	1.49932	1.72435	2.0029	2.32805	2.6649	2.92986	3.05129
2.12	1.19336	1.32901	1.50666	1.73441	2.01673	2.34653	2.68763	2.95336	3.07233
2.13	1.19775	1.33456	1.51404	1.74453	2.03068	2.36517	2.71053	2.97693	3.09339
2.14	1.20216	1.34012	1.52145	1.75472	2.04473	2.38398	2.73361	3.00056	3.11446
2.15	1.20659	1.34572	1.52891	1.76498	2.05889	2.40295	2.75687	3.02426	3.13556
2.16	1.21104	1.35133	1.5364	1.7753	2.07317	2.42209	2.78031	3.04801	3.15668
2.17	1.21551	1.35698	1.54394	1.78569	2.08756	2.4414	2.80393	3.07181	3.17783
2.18	1.22	1.36264	1.55151	1.79615	2.10206	2.46087	2.82772	3.09567	3.199
2.19	1.22451	1.36834	1.55912	1.80667	2.11667	2.48052	2.8517	3.11956	3.22021
2.2	1.22903	1.37406	1.56677	1.81726	2.1314	2.50033	2.87585	3.1435	3.24145
2.21	1.23358	1.3798	1.57447	1.82793	2.14624	2.52032	2.90017	3.16748	3.26272
2.22	1.23815	1.38557	1.5822	1.83866	2.16121	2.54049	2.92468	3.1915	3.28403
2.23	1.24273	1.39137	1.58997	1.84945	2.17628	2.56083	2.94935	3.21554	3.30538
2.24	1.24734	1.39719	1.59779	1.86032	2.19148	2.58134	2.9742	3.23962	3.32678
2.25	1.25197	1.40304	1.60564	1.87126	2.2068	2.60204	2.99923	3.26371	3.34821
2.26	1.25661	1.40891	1.61354	1.88228	2.22223	2.62291	3.02442	3.28784	3.3697
2.27	1.26128	1.41481	1.62148	1.89336	2.23779	2.64397	3.04979	3.31198	3.39123
2.28	1.26597	1.42074	1.62945	1.90451	2.25347	2.66521	3.07533	3.33614	3.41281
2.29	1.27068	1.42669	1.63748	1.91574	2.26928	2.68663	3.10103	3.36031	3.43445
2.3	1.27541	1.43267	1.64554	1.92704	2.28521	2.70823	3.1269	3.3845	3.45614
2.31	1.28016	1.43868	1.65364	1.93841	2.30126	2.73003	3.15293	3.4087	3.4779
2.32	1.28493	1.44471	1.66179	1.94986	2.31744	2.75201	3.17913	3.43291	3.49971
2.33	1.28972	1.45077	1.66998	1.96138	2.33375	2.77418	3.20548	3.45713	3.52159
2.34	1.29453	1.45686	1.67821	1.97297	2.35019	2.79654	3.232	3.48136	3.54353
2.35	1.29936	1.46298	1.68649	1.98465	2.36675	2.81909	3.25867	3.5056	3.56554
2.36	1.30422	1.46912	1.69481	1.99639	2.38345	2.84183	3.28549	3.52984	3.58762
2.37	1.30909	1.47529	1.70317	2.00822	2.40028	2.86477	3.31246	3.55409	3.60977
2.38	1.31399	1.48149	1.71158	2.02012	2.41724	2.88791	3.33959	3.57835	3.632
2.39	1.3189	1.48771	1.72003	2.03209	2.43434	2.91124	3.36686	3.60262	3.6543
2.4	1.32384	1.49396	1.72852	2.04415	2.45157	2.93477	3.39427	3.6269	3.67668
2.41	1.32881	1.50025	1.73706	2.05628	2.46893	2.9585	3.42182	3.65119	3.69914
2.42	1.33379	1.50655	1.74564	2.06849	2.48643	2.98243	3.4495	3.67549	3.72167
2.43	1.33879	1.51289	1.75427	2.08079	2.50408	3.00656	3.47732	3.69981	3.74429
2.44	1.34382	1.51926	1.76294	2.09316	2.52186	3.0309	3.50527	3.72414	3.767
2.45	1.34887	1.52565	1.77166	2.10561	2.53978	3.05544	3.53334	3.74848	3.78979
2.46	1.35394	1.53207	1.78042	2.11814	2.55784	3.08019	3.56154	3.77285	3.81267
2.47	1.35903	1.53852	1.78923	2.13076	2.57605	3.10514	3.58985	3.79724	3.83564
2.48	1.36414	1.545	1.79809	2.14346	2.59439	3.13031	3.61828	3.82165	3.85869
2.49	1.36928	1.55151	1.80699	2.15623	2.61289	3.15568	3.64681	3.84609	3.88184
2.5	1.37444	1.55805	1.81594	2.1691	2.63153	3.18127	3.67545	3.87056	3.90508
2.51	1.37962	1.56461	1.82493	2.18204	2.65032	3.20706	3.70419	3.89506	3.92842
2.52	1.38483	1.57121	1.83398	2.19508	2.66925	3.23307	3.73303	3.91959	3.95185
2.53	1.39005	1.57783	1.84307	2.20819	2.68834	3.2593	3.76196	3.94417	3.97538
2.54	1.3953	1.58449	1.8522	2.22139	2.70758	3.28574	3.79097	3.96878	3.999
2.55	1.40058	1.59117	1.86139	2.23468	2.72697	3.3124	3.82007	3.99345	4.02272
2.56	1.40587	1.59789	1.87062	2.24806	2.74651	3.33927	3.84924	4.01816	4.04654
2.57	1.41119	1.60463	1.8799	2.26152	2.76621	3.36637	3.87848	4.04291	4.07047
2.58	1.41653	1.6114	1.88923	2.27507	2.78606	3.39368	3.90779	4.06773	4.09449
2.59	1.4219	1.61821	1.89861	2.2887	2.80607	3.42122	3.93716	4.0926	4.11862
2.6	1.42729	1.62504	1.90803	2.30243	2.82624	3.44898	3.96659	4.11753	4.14285
2.61	1.4327	1.63191	1.91751	2.31625	2.84657	3.47696	3.99607	4.14252	4.16718
2.62	1.43814	1.6388	1.92703	2.33015	2.86706	3.50516	4.0256	4.16758	4.19162
2.63	1.4436	1.64573	1.93661	2.34415	2.88772	3.53359	4.05516	4.19271	4.21616
2.64	1.44908	1.65268	1.94623	2.35824	2.90853	3.56225	4.08477	4.21791	4.24081
2.65	1.45459	1.65967	1.95591	2.37242	2.92951	3.59113	4.11441	4.24319	4.26557
2.66	1.46012	1.66669	1.96563	2.38669	2.95066	3.62024	4.14408	4.26854	4.29044
2.67	1.46568	1.67374	1.97541	2.40106	2.97198	3.64957	4.17377	4.29397	4.31541
2.68	1.47126	1.68082	1.98523	2.41552	2.99346	3.67914	4.20348	4.31948	4.3405
2.69	1.47687	1.68793	1.99511	2.43008	3.01511	3.70893	4.2332	4.34508	4.36569
2.7	1.4825	1.69508	2.00504	2.44473	3.03694	3.73896	4.26294	4.37077	4.391
2.71	1.48815	1.70225	2.01502	2.45947	3.05894	3.76921	4.29269	4.39654	4.41642
2.72	1.49383	1.70946	2.02506	2.47432	3.08111	3.7997	4.32245	4.4224	4.44195
2.73	1.49954	1.7167	2.03514	2.48926	3.10346	3.83041	4.35221	4.44836	4.46759
2.74	1.50526	1.72397	2.04528	2.50429	3.12599	3.86136	4.38197	4.47442	4.49335
2.75	1.51102	1.73128	2.05547	2.51943	3.1487	3.89254	4.41173	4.50057	4.51922
2.76	1.5168	1.73862	2.06571	2.53466	3.17158	3.92395	4.44149	4.52682	4.54521
2.77	1.5226	1.74599	2.07601	2.55	3.19465	3.9556	4.47124	4.55317	4.57132
2.78	1.52843	1.75339	2.08636	2.56544	3.2179	3.98748	4.50099	4.57963	4.59754
2.79	1.53429	1.76082	2.09677	2.58097	3.24133	4.01958	4.53074	4.60619	4.62388
2.8	1.54017	1.76829	2.10723	2.59661	3.26496	4.05192	4.56048	4.63285	4.65033
2.81	1.54608	1.77579	2.11774	2.61235	3.28876	4.0845	4.59022	4.65962	4.67691
2.82	1.55201	1.78333	2.12831	2.6282	3.31276	4.1173	4.61995	4.68651	4.7036
2.83	1.55797	1.79089	2.13893	2.64414	3.33695	4.15034	4.64969	4.7135	4.73042
2.84	1.56395	1.7985	2.14961	2.6602	3.36133	4.1836	4.67942	4.7406	4.75735
2.85	1.56997	1.80613	2.16034	2.67636	3.3859	4.2171	4.70915	4.76782	4.78441
2.86	1.576	1.8138	2.17114	2.69262	3.41067	4.25082	4.73889	4.79515	4.81159
2.87	1.58207	1.8215	2.18198	2.70899	3.43563	4.28478	4.76863	4.8226	4.83889
2.88	1.58816	1.82924	2.19288	2.72547	3.46079	4.31896	4.79838	4.85016	4.86631
2.89	1.59428	1.83701	2.20384	2.74206	3.48616	4.35337	4.82814	4.87784	4.89386
2.9	1.60042	1.84482	2.21486	2.75875	3.51172	4.388	4.85792	4.90564	4.92153
2.91	1.60659	1.85266	2.22594	2.77556	3.53748	4.42286	4.88772	4.93357	4.94933
2.92	1.61279	1.86054	2.23707	2.79247	3.56345	4.45794	4.91754	4.96161	4.97725
2.93	1.61901	1.86845	2.24826	2.8095	3.58963	4.49325	4.94739	4.98977	5.0053
2.94	1.62527	1.87639	2.25951	2.82664	3.61601	4.52877	4.97727	5.01806	5.03348
2.95	1.63155	1.88437	2.27081	2.84389	3.64261	4.56451	5.00718	5.04647	5.06178
2.96	1.63785	1.89239	2.28218	2.86126	3.66941	4.60046	5.03713	5.075	5.09021
2.97	1.64419	1.90044	2.2936	2.87874	3.69643	4.63663	5.06713	5.10366	5.11877
2.98	1.65055	1.90853	2.30509	2.89633	3.72366	4.67301	5.09717	5.13245	5.14747
2.99	1.65694	1.91665	2.31663	2.91405	3.7511	4.70959	5.12727	5.16137	5.17629
3	1.66336	1.92481	2.32824	2.93187	3.77877	4.74638	5.15742	5.19041	5.20524
3.01	1.66981	1.93301	2.3399	2.94982	3.80665	4.78338	5.18763	5.21958	5.23432
3.02	1.67629	1.94124	2.35163	2.96788	3.83475	4.82057	5.21791	5.24888	5.26354
3.03	1.68279	1.94951	2.36341	2.98606	3.86308	4.85796	5.24826	5.27832	5.29289
3.04	1.68932	1.95781	2.37526	3.00436	3.89163	4.89554	5.27868	5.30788	5.32237
3.05	1.69589	1.96616	2.38717	3.02279	3.92041	4.93331	5.30917	5.33758	5.35199
3.06	1.70248	1.97454	2.39914	3.04133	3.94941	4.97126	5.33975	5.36741	5.38174
3.07	1.70909	1.98295	2.41117	3.06	3.97865	5.0094	5.37042	5.39738	5.41163
3.08	1.71574	1.99141	2.42327	3.07879	4.00811	5.04771	5.40117	5.42747	5.44165
3.09	1.72242	1.9999	2.43543	3.0977	4.03781	5.08619	5.43202	5.45771	5.47181
3.1	1.72913	2.00843	2.44765	3.11674	4.06774	5.12484	5.46296	5.48808	5.50211
3.11	1.73586	2.01699	2.45994	3.1359	4.09791	5.16365	5.494	5.51859	5.53254
3.12	1.74263	2.0256	2.47229	3.1552	4.12832	5.20261	5.52515	5.54923	5.56312
3.13	1.74943	2.03424	2.4847	3.17461	4.15897	5.24173	5.5564	5.58002	5.59383
3.14	1.75625	2.04292	2.49718	3.19416	4.18986	5.28099	5.58776	5.61094	5.62469
3.15	1.76311	2.05164	2.50973	3.21384	4.22099	5.32038	5.61923	5.642	5.65569
3.16	1.76999	2.0604	2.52234	3.23364	4.25237	5.35991	5.65082	5.6732	5.68682
3.17	1.77691	2.06919	2.53501	3.25358	4.284	5.39957	5.68252	5.70455	5.7181
3.18	1.78385	2.07803	2.54775	3.27365	4.31588	5.43934	5.71434	5.73604	5.74953
3.19	1.79083	2.0869	2.56056	3.29385	4.348	5.47923	5.74629	5.76767	5.7811
3.2	1.79784	2.09582	2.57343	3.31418	4.38038	5.51922	5.77836	5.79944	5.81281
3.21	1.80488	2.10477	2.58638	3.33465	4.41302	5.55931	5.81055	5.83136	5.84466
3.22	1.81195	2.11376	2.59938	3.35526	4.44591	5.59949	5.84287	5.86342	5.87667
3.23	1.81905	2.1228	2.61246	3.376	4.47906	5.63976	5.87533	5.89563	5.90882
3.24	1.82618	2.13187	2.6256	3.39688	4.51248	5.6801	5.90792	5.92798	5.94111
3.25	1.83334	2.14098	2.63882	3.4179	4.54615	5.72051	5.94064	5.96048	5.97356
3.26	1.84054	2.15014	2.6521	3.43905	4.58009	5.76098	5.97349	5.99313	6.00615
3.27	1.84776	2.15933	2.66545	3.46035	4.6143	5.8015	6.00649	6.02593	6.03889
3.28	1.85502	2.16857	2.67887	3.48179	4.64877	5.84207	6.03962	6.05888	6.07179
3.29	1.86231	2.17784	2.69236	3.50337	4.68352	5.88268	6.0729	6.09198	6.10483
3.3	1.86964	2.18716	2.70592	3.52509	4.71853	5.92332	6.10631	6.12523	6.13803
3.31	1.87699	2.19652	2.71955	3.54696	4.75382	5.96398	6.13988	6.15863	6.17137
3.32	1.88438	2.20592	2.73325	3.56897	4.78939	6.00466	6.17358	6.19218	6.20487
3.33	1.8918	2.21536	2.74703	3.59113	4.82524	6.04535	6.20744	6.22589	6.23853
3.34	1.89925	2.22484	2.76087	3.61344	4.86136	6.08604	6.24144	6.25975	6.27234
3.35	1.90674	2.23437	2.77479	3.63589	4.89777	6.12673	6.27559	6.29377	6.3063
3.36	1.91425	2.24393	2.78878	3.65849	4.93446	6.16741	6.30989	6.32794	6.34042
3.37	1.92181	2.25354	2.80284	3.68125	4.97144	6.20808	6.34434	6.36227	6.3747
3.38	1.92939	2.2632	2.81697	3.70415	5.0087	6.24873	6.37894	6.39675	6.40914
3.39	1.93701	2.27289	2.83118	3.72721	5.04626	6.28936	6.4137	6.43139	6.44373
3.4	1.94466	2.28263	2.84547	3.75042	5.08411	6.32996	6.44861	6.46619	6.47848
3.41	1.95235	2.29241	2.85982	3.77378	5.12225	6.37053	6.48368	6.50115	6.5134
3.42	1.96006	2.30223	2.87426	3.7973	5.16069	6.41107	6.51891	6.53627	6.54847
3.43	1.96782	2.3121	2.88876	3.82098	5.19942	6.45157	6.55429	6.57155	6.5837
3.44	1.97561	2.32201	2.90335	3.84481	5.23846	6.49204	6.58983	6.607	6.6191
3.45	1.98343	2.33197	2.918	3.8688	5.27779	6.53248	6.62554	6.6426	6.65466
3.46	1.99128	2.34197	2.93274	3.89296	5.31744	6.57288	6.6614	6.67837	6.69038
3.47	1.99918	2.35201	2.94755	3.91727	5.35738	6.61325	6.69743	6.7143	6.72627
3.48	2.0071	2.3621	2.96244	3.94174	5.39764	6.65359	6.73361	6.7504	6.76232
3.49	2.01506	2.37223	2.97741	3.96638	5.4382	6.69389	6.76996	6.78666	6.79854
3.5	2.02306	2.38241	2.99245	3.99118	5.47908	6.73417	6.80648	6.82309	6.83493
3.51	2.03109	2.39263	3.00757	4.01615	5.52027	6.77443	6.84316	6.85969	6.87148
3.52	2.03916	2.4029	3.02277	4.04128	5.56178	6.81467	6.88001	6.89645	6.9082
3.53	2.04726	2.41321	3.03805	4.06658	5.6036	6.8549	6.91702	6.93339	6.9451
3.54	2.0554	2.42357	3.05341	4.09205	5.64575	6.89512	6.95421	6.97049	6.98216
3.55	2.06357	2.43398	3.06885	4.11769	5.68821	6.93533	6.99156	7.00776	7.01939
3.56	2.07178	2.44443	3.08437	4.14351	5.731	6.97555	7.02908	7.04521	7.05679
3.57	2.08003	2.45492	3.09998	4.16949	5.77412	7.01578	7.06678	7.08282	7.09437
3.58	2.08832	2.46547	3.11566	4.19565	5.81756	7.05603	7.10464	7.12061	7.13212
3.59	2.09664	2.47606	3.13142	4.22198	5.86134	7.0963	7.14268	7.15858	7.17004
3.6	2.10499	2.4867	3.14727	4.24848	5.90544	7.13661	7.18089	7.19671	7.20814
3.61	2.11339	2.49738	3.1632	4.27517	5.94988	7.17695	7.21927	7.23503	7.24642
3.62	2.12182	2.50811	3.17921	4.30203	5.99465	7.21734	7.25784	7.27352	7.28487
3.63	2.13029	2.51889	3.1953	4.32907	6.03976	7.25778	7.29657	7.31218	7.3235
3.64	2.13879	2.52972	3.21148	4.3563	6.08521	7.29828	7.33549	7.35103	7.3623
3.65	2.14733	2.54059	3.22775	4.3837	6.131	7.33885	7.37458	7.39005	7.40129
3.66	2.15592	2.55151	3.24409	4.41129	6.17713	7.3795	7.41385	7.42925	7.44046
3.67	2.16453	2.56249	3.26053	4.43906	6.22361	7.42023	7.4533	7.46864	7.4798
3.68	2.17319	2.5735	3.27704	4.46702	6.27043	7.46104	7.49293	7.5082	7.51933
3.69	2.18189	2.58457	3.29365	4.49517	6.3176	7.50195	7.53274	7.54795	7.55904
3.7	2.19062	2.59569	3.31034	4.5235	6.36512	7.54297	7.57274	7.58788	7.59894
3.71	2.19939	2.60686	3.32712	4.55202	6.41299	7.58409	7.61291	7.62799	7.63902
3.72	2.20821	2.61807	3.34398	4.58074	6.46121	7.62533	7.65328	7.66829	7.67928
3.73	2.21706	2.62934	3.36094	4.60964	6.50979	7.66669	7.69382	7.70878	7.71973
3.74	2.22595	2.64065	3.37798	4.63874	6.55872	7.70817	7.73456	7.74945	7.76037
3.75	2.23488	2.65202	3.39511	4.66804	6.60801	7.74978	7.77548	7.79031	7.80119
3.76	2.24384	2.66344	3.41233	4.69753	6.65766	7.79153	7.81658	7.83135	7.84221
3.77	2.25285	2.6749	3.42964	4.72722	6.70767	7.83342	7.85788	7.87259	7.88341
3.78	2.2619	2.68642	3.44704	4.75711	6.75804	7.87546	7.89936	7.91402	7.9248
3.79	2.27099	2.69799	3.46453	4.7872	6.80878	7.91765	7.94104	7.95563	7.96639
3.8	2.28012	2.70961	3.48211	4.81749	6.85988	7.95999	7.98291	7.99744	8.00816
3.81	2.28929	2.72128	3.49978	4.84798	6.91134	8.00248	8.02497	8.03945	8.05013
3.82	2.2985	2.733	3.51755	4.87868	6.96317	8.04515	8.06722	8.08164	8.0923
3.83	2.30775	2.74477	3.5354	4.90959	7.01537	8.08797	8.10967	8.12403	8.13466
3.84	2.31704	2.7566	3.55335	4.9407	7.06794	8.13096	8.15231	8.16662	8.17721
3.85	2.32637	2.76848	3.5714	4.97202	7.12088	8.17413	8.19515	8.2094	8.21997
3.86	2.33575	2.78041	3.58953	5.00355	7.17418	8.21747	8.23818	8.25238	8.26292
3.87	2.34516	2.79239	3.60777	5.03529	7.22786	8.26099	8.28141	8.29556	8.30606
3.88	2.35462	2.80443	3.62609	5.06725	7.28191	8.30469	8.32485	8.33894	8.34941
3.89	2.36412	2.81652	3.64452	5.09942	7.33634	8.34857	8.36848	8.38252	8.39296
3.9	2.37366	2.82866	3.66304	5.13181	7.39114	8.39263	8.41231	8.4263	8.43671
3.91	2.38325	2.84086	3.68165	5.16441	7.44631	8.43689	8.45634	8.47028	8.48066
3.92	2.39288	2.85311	3.70036	5.19724	7.50185	8.48133	8.50058	8.51447	8.52482
3.93	2.40255	2.86542	3.71917	5.23028	7.55777	8.52597	8.54502	8.55886	8.56918
3.94	2.41226	2.87778	3.73808	5.26355	7.61406	8.5708	8.58966	8.60345	8.61375
3.95	2.42201	2.89019	3.75709	5.29704	7.67073	8.61582	8.63451	8.64825	8.65852
3.96	2.43181	2.90266	3.77619	5.33076	7.72777	8.66105	8.67957	8.69326	8.7035
3.97	2.44166	2.91519	3.7954	5.3647	7.78519	8.70647	8.72483	8.73847	8.74868
3.98	2.45154	2.92777	3.8147	5.39887	7.84298	8.7521	8.77031	8.7839	8.79408
3.99	2.46147	2.9404	3.83411	5.43328	7.90114	8.79792	8.81599	8.82953	8.83969
4	2.47145	2.9531	3.85362	5.46791	7.95967	8.84395	8.86188	8.87538	8.8855
4.01	2.48146	2.96584	3.87322	5.50278	8.01857	8.89019	8.90799	8.92143	8.93153
4.02	2.49153	2.97865	3.89294	5.53788	8.07784	8.93664	8.9543	8.9677	8.97778
4.03	2.50164	2.99151	3.91275	5.57322	8.13749	8.98329	9.00083	9.01419	9.02423
4.04	2.51179	3.00443	3.93267	5.60879	8.19749	9.03015	9.04758	9.06089	9.0709
4.05	2.52199	3.0174	3.95269	5.64461	8.25787	9.07723	9.09454	9.1078	9.11779
4.06	2.53223	3.03044	3.97281	5.68067	8.3186	9.12452	9.14171	9.15493	9.1649
4.07	2.54252	3.04353	3.99304	5.71697	8.3797	9.17202	9.18911	9.20228	9.21222
4.08	2.55285	3.05667	4.01338	5.75351	8.44116	9.21974	9.23672	9.24985	9.25976
4.09	2.56323	3.06988	4.03382	5.79031	8.50297	9.26768	9.28455	9.29764	9.30752
4.1	2.57366	3.08315	4.05436	5.82735	8.56513	9.31583	9.3326	9.34565	9.35551
4.11	2.58414	3.09647	4.07502	5.86464	8.62764	9.3642	9.38088	9.39388	9.40371
4.12	2.59466	3.10985	4.09578	5.90218	8.6905	9.41279	9.42937	9.44233	9.45214
4.13	2.60522	3.12329	4.11665	5.93998	8.7537	9.46161	9.47809	9.49101	9.50079
4.14	2.61584	3.1368	4.13763	5.97803	8.81724	9.51065	9.52704	9.53991	9.54967
4.15	2.6265	3.15036	4.15872	6.01633	8.88112	9.55991	9.57621	9.58904	9.59878
4.16	2.63721	3.16398	4.17992	6.0549	8.94532	9.6094	9.62561	9.6384	9.64811
4.17	2.64796	3.17766	4.20123	6.09373	9.00984	9.65911	9.67523	9.68798	9.69767
4.18	2.65877	3.1914	4.22265	6.13282	9.07468	9.70905	9.72509	9.73779	9.74746
4.19	2.66962	3.2052	4.24418	6.17217	9.13983	9.75922	9.77517	9.78784	9.79748
4.2	2.68052	3.21907	4.26583	6.21179	9.20529	9.80962	9.82549	9.83811	9.84773
4.21	2.69147	3.23299	4.28758	6.25168	9.27104	9.86025	9.87603	9.88862	9.89822
4.22	2.70247	3.24698	4.30946	6.29184	9.33709	9.91111	9.92682	9.93936	9.94894
4.23	2.71351	3.26103	4.33144	6.33226	9.40342	9.96221	9.97783	9.99034	9.99989
4.24	2.72461	3.27514	4.35354	6.37297	9.47002	10.0135	10.0291	10.0416	10.0511
4.25	2.73575	3.28931	4.37575	6.41394	9.53688	10.0651	10.0806	10.093	10.1025
4.26	2.74695	3.30355	4.39809	6.4552	9.60401	10.1169	10.1323	10.1447	10.1542
4.27	2.75819	3.31784	4.42053	6.49673	9.67137	10.169	10.1843	10.1966	10.2061
4.28	2.76949	3.33221	4.4431	6.53855	9.73898	10.2212	10.2365	10.2488	10.2582
4.29	2.78083	3.34663	4.46578	6.58064	9.8068	10.2737	10.2889	10.3012	10.3106
4.3	2.79223	3.36112	4.48858	6.62303	9.87484	10.3265	10.3416	10.3538	10.3632
4.31	2.80368	3.37568	4.5115	6.6657	9.94308	10.3795	10.3945	10.4067	10.4161
4.32	2.81518	3.39029	4.53454	6.70866	10.0115	10.4328	10.4477	10.4599	10.4692
4.33	2.82673	3.40498	4.55769	6.75191	10.0801	10.4863	10.5011	10.5132	10.5226
4.34	2.83833	3.41972	4.58097	6.79545	10.1489	10.54	10.5548	10.5669	10.5762
4.35	2.84998	3.43454	4.60437	6.83929	10.2178	10.594	10.6087	10.6208	10.63
4.36	2.86168	3.44942	4.6279	6.88342	10.2868	10.6482	10.6629	10.6749	10.6842
4.37	2.87344	3.46436	4.65154	6.92786	10.356	10.7027	10.7173	10.7293	10.7385
4.38	2.88525	3.47937	4.67531	6.97259	10.4252	10.7574	10.7719	10.7839	10.7931
4.39	2.89711	3.49445	4.69921	7.01763	10.4946	10.8124	10.8269	10.8388	10.848
4.4	2.90903	3.50959	4.72322	7.06297	10.564	10.8676	10.882	10.8939	10.9031
4.41	2.921	3.5248	4.74737	7.10862	10.6335	10.9231	10.9374	10.9493	10.9585
4.42	2.93302	3.54008	4.77163	7.15459	10.7029	10.9789	10.9931	11.0049	11.0141
4.43	2.94509	3.55542	4.79603	7.20086	10.7725	11.0349	11.0491	11.0609	11.07
4.44	2.95722	3.57084	4.82055	7.24744	10.842	11.0911	11.1052	11.117	11.1261
4.45	2.96941	3.58632	4.8452	7.29435	10.9115	11.1477	11.1617	11.1734	11.1825
4.46	2.98164	3.60187	4.86998	7.34157	10.9809	11.2044	11.2184	11.2301	11.2392
4.47	2.99394	3.61749	4.89489	7.38911	11.0503	11.2615	11.2754	11.2871	11.2961
4.48	3.00628	3.63318	4.91993	7.43697	11.1197	11.3188	11.3326	11.3443	11.3533
4.49	3.01869	3.64893	4.9451	7.48516	11.189	11.3763	11.3901	11.4017	11.4107
4.5	3.03115	3.66476	4.9704	7.53368	11.2582	11.4342	11.4479	11.4595	11.4685
4.51	3.04366	3.68066	4.99583	7.58252	11.3272	11.4923	11.5059	11.5175	11.5264
4.52	3.05623	3.69663	5.0214	7.6317	11.3962	11.5506	11.5642	11.5757	11.5847
4.53	3.06885	3.71266	5.04709	7.68121	11.465	11.6092	11.6228	11.6343	11.6432
4.54	3.08154	3.72877	5.07293	7.73106	11.5337	11.6681	11.6816	11.6931	11.702
4.55	3.09428	3.74495	5.09889	7.78124	11.6023	11.7273	11.7408	11.7522	11.761
4.56	3.10707	3.76121	5.125	7.83177	11.6707	11.7868	11.8001	11.8115	11.8204
4.57	3.11993	3.77753	5.15124	7.88264	11.7389	11.8465	11.8598	11.8711	11.88
4.58	3.13284	3.79393	5.17761	7.93386	11.8071	11.9065	11.9197	11.9311	11.9399
4.59	3.1458	3.8104	5.20412	7.98542	11.875	11.9667	11.9799	11.9912	12
4.6	3.15883	3.82694	5.23078	8.03733	11.9428	12.0273	12.0404	12.0517	12.0605
4.61	3.17192	3.84355	5.25757	8.0896	12.0105	12.0881	12.1012	12.1124	12.1212
4.62	3.18506	3.86024	5.2845	8.14222	12.078	12.1492	12.1622	12.1734	12.1822
4.63	3.19826	3.877	5.31157	8.1952	12.1455	12.2106	12.2235	12.2347	12.2435
4.64	3.21152	3.89384	5.33878	8.24854	12.2128	12.2722	12.2852	12.2963	12.305
4.65	3.22484	3.91075	5.36614	8.30224	12.28	12.3342	12.347	12.3582	12.3669
4.66	3.23822	3.92774	5.39363	8.35631	12.3471	12.3964	12.4092	12.4203	12.429
4.67	3.25166	3.9448	5.42127	8.41075	12.4142	12.4589	12.4717	12.4827	12.4914
4.68	3.26516	3.96194	5.44906	8.46555	12.4812	12.5217	12.5344	12.5454	12.5541
4.69	3.27873	3.97915	5.47699	8.52073	12.5482	12.5848	12.5975	12.6084	12.6171
4.7	3.29235	3.99644	5.50507	8.57628	12.6151	12.6482	12.6608	12.6717	12.6804
4.71	3.30603	4.0138	5.53329	8.63221	12.6821	12.7118	12.7244	12.7353	12.7439
4.72	3.31977	4.03124	5.56166	8.68852	12.749	12.7758	12.7883	12.7992	12.8078
4.73	3.33358	4.04876	5.59017	8.74522	12.8161	12.84	12.8525	12.8634	12.8719
4.74	3.34745	4.06636	5.61884	8.8023	12.8831	12.9046	12.917	12.9278	12.9364
4.75	3.36138	4.08403	5.64766	8.85976	12.9503	12.9694	12.9818	12.9926	13.0011
4.76	3.37537	4.10179	5.67662	8.91762	13.0175	13.0345	13.0468	13.0577	13.0662
4.77	3.38942	4.11962	5.70574	8.97588	13.0848	13.1	13.1122	13.123	13.1315
4.78	3.40354	4.13753	5.73501	9.03452	13.1523	13.1657	13.1779	13.1887	13.1972
4.79	3.41772	4.15552	5.76443	9.09357	13.2199	13.2317	13.2439	13.2546	13.2631
4.8	3.43196	4.17359	5.79401	9.15302	13.2877	13.2981	13.3102	13.3209	13.3293
4.81	3.44627	4.19174	5.82374	9.21287	13.3556	13.3647	13.3768	13.3874	13.3959
4.82	3.46064	4.20997	5.85362	9.27313	13.4237	13.4316	13.4436	13.4543	13.4627
4.83	3.47508	4.22828	5.88366	9.3338	13.492	13.4989	13.5108	13.5214	13.5298
4.84	3.48958	4.24667	5.91386	9.39489	13.5605	13.5664	13.5783	13.5889	13.5973
4.85	3.50415	4.26514	5.94422	9.45639	13.6292	13.6343	13.6461	13.6567	13.6651
4.86	3.51878	4.28369	5.97473	9.5183	13.6982	13.7024	13.7142	13.7248	13.7331
4.87	3.53348	4.30233	6.0054	9.58064	13.7673	13.7709	13.7827	13.7932	13.8015
4.88	3.54824	4.32105	6.03624	9.6434	13.8368	13.8397	13.8514	13.8619	13.8702
4.89	3.56307	4.33985	6.06723	9.70659	13.9064	13.9088	13.9205	13.9309	13.9392
4.9	3.57797	4.35873	6.09839	9.77021	13.9764	13.9782	13.9898	14.0002	14.0085
4.91	3.59293	4.3777	6.12971	9.83426	14.0465	14.0479	14.0595	14.0699	14.0782
4.92	3.60796	4.39675	6.16119	9.89874	14.117	14.1179	14.1295	14.1398	14.1481
4.93	3.62306	4.41589	6.19283	9.96367	14.1877	14.1883	14.1997	14.2101	14.2183
4.94	3.63822	4.43511	6.22464	10.029	14.2588	14.2589	14.2704	14.2807	14.2889
4.95	3.65345	4.45442	6.25662	10.0948	14.3301	14.3299	14.3413	14.3516	14.3598
4.96	3.66876	4.47381	6.28876	10.1611	14.4017	14.4012	14.4125	14.4228	14.431
4.97	3.68413	4.49329	6.32108	10.2278	14.4736	14.4728	14.4841	14.4943	14.5025
4.98	3.69957	4.51285	6.35356	10.295	14.5457	14.5447	14.556	14.5662	14.5744
4.99	3.71507	4.5325	6.38621	10.3626	14.6182	14.6169	14.6282	14.6384	14.6465
5	3.73065	4.55224	6.41903	10.4307	14.691	14.6895	14.7007	14.7109	14.719
5.01	3.7463	4.57206	6.45202	10.4992	14.7641	14.7624	14.7735	14.7837	14.7918
5.02	3.76202	4.59198	6.48518	10.5682	14.8375	14.8356	14.8467	14.8568	14.8649
5.03	3.77781	4.61198	6.51852	10.6377	14.9112	14.9091	14.9201	14.9303	14.9383
5.04	3.79367	4.63207	6.55203	10.7076	14.9852	14.983	14.9939	15.004	15.0121
5.05	3.8096	4.65224	6.58571	10.778	15.0595	15.0571	15.0681	15.0781	15.0862
5.06	3.8256	4.67251	6.61957	10.8489	15.1342	15.1316	15.1425	15.1525	15.1606
5.07	3.84168	4.69287	6.65361	10.9203	15.2091	15.2064	15.2172	15.2272	15.2353
5.08	3.85782	4.71331	6.68782	10.9922	15.2844	15.2815	15.2923	15.3023	15.3103
5.09	3.87404	4.73385	6.72222	11.0645	15.3599	15.3569	15.3677	15.3776	15.3856
5.1	3.89033	4.75448	6.75679	11.1373	15.4358	15.4327	15.4434	15.4533	15.4613
5.11	3.9067	4.7752	6.79154	11.2106	15.512	15.5087	15.5194	15.5293	15.5372
5.12	3.92314	4.79601	6.82648	11.2845	15.5885	15.5851	15.5957	15.6056	15.6135
5.13	3.93965	4.81691	6.86159	11.3588	15.6653	15.6617	15.6723	15.6822	15.6901
5.14	3.95624	4.83791	6.89689	11.4336	15.7424	15.7387	15.7492	15.759	15.7669
5.15	3.9729	4.85899	6.93237	11.509	15.8197	15.816	15.8264	15.8362	15.8441
5.16	3.98964	4.88017	6.96804	11.5848	15.8974	15.8935	15.9039	15.9137	15.9215
5.17	4.00645	4.90145	7.0039	11.6611	15.9754	15.9713	15.9817	15.9914	15.9992
5.18	4.02333	4.92282	7.03994	11.738	16.0536	16.0494	16.0597	16.0694	16.0772
5.19	4.0403	4.94428	7.07617	11.8154	16.132	16.1277	16.138	16.1476	16.1554
5.2	4.05734	4.96584	7.11258	11.8933	16.2107	16.2063	16.2164	16.2261	16.2338
5.21	4.07445	4.98749	7.14919	11.9717	16.2897	16.2851	16.2951	16.3047	16.3124
5.22	4.09164	5.00924	7.18599	12.0506	16.3687	16.364	16.374	16.3835	16.3912
5.23	4.10891	5.03109	7.22298	12.1301	16.448	16.443	16.4529	16.4624	16.47
5.24	4.12626	5.05303	7.26016	12.2101	16.5273	16.5221	16.5319	16.5413	16.5489
5.25	4.14369	5.07507	7.29754	12.2907	16.6066	16.6012	16.6108	16.6201	16.6276
5.26	4.16119	5.09721	7.33511	12.3718	16.6857	16.68	16.6894	16.6985	16.706
5.27	4.17877	5.11944	7.37287	12.4534	16.7645	16.7583	16.7674	16.7764	16.7837
5.28	4.19644	5.14177	7.41084	12.5355	16.8424	16.8354	16.8441	16.8527	16.8598
5.29	4.21418	5.16421	7.449	12.6182	16.9185	16.9102	16.9179	16.9258	16.9323
5.3	4.232	5.18674	7.48735	12.7015	16.9903	16.978	16.9824	16.9875	16.9917
5.31	4.2499	5.20937	7.52591	12.7853	17.0433	16.9962	16.9773	16.9825	16.9866
5.32	4.26788	5.2321	7.56467	12.8697	17.0382	16.9911	17.0326	17.0332	17.0338
5.33	4.28594	5.25493	7.60363	12.9546	17.078	17.0397	17.0745	17.0717	17.071
5.34	4.30409	5.27786	7.6428	13.04	17.1157	17.0771	17.1117	17.1098	17.1096
5.35	4.32231	5.30089	7.68216	13.1261	17.1541	17.1156	17.1503	17.148	17.1476
5.36	4.34062	5.32403	7.72174	13.2127	17.1922	17.1537	17.1883	17.1862	17.1859
5.37	4.35901	5.34726	7.76151	13.2998	17.2304	17.1919	17.2265	17.2243	17.224
5.38	4.37748	5.3706	7.8015	13.3875	17.2686	17.2301	17.2646	17.2625	17.2622
5.39	4.39604	5.39404	7.84169	13.4757	17.3067	17.2682	17.3028	17.3006	17.3003
5.4	4.41467	5.41759	7.88209	13.5646	17.3449	17.3064	17.3409	17.3387	17.3384
5.41	4.4334	5.44124	7.9227	13.6539	17.383	17.3445	17.379	17.3769	17.3765
5.42	4.4522	5.46499	7.96352	13.7439	17.4211	17.3826	17.4171	17.415	17.4146
5.43	4.4711	5.48885	8.00455	13.8343	17.4592	17.4207	17.4552	17.453	17.4527
5.44	4.49007	5.51282	8.0458	13.9253	17.4973	17.4588	17.4933	17.4911	17.4908
5.45	4.50913	5.53689	8.08726	14.0169	17.5354	17.4969	17.5314	17.5292	17.5289
5.46	4.52828	5.56106	8.12894	14.109	17.5735	17.535	17.5694	17.5672	17.5669
5.47	4.54751	5.58535	8.17083	14.2016	17.6115	17.573	17.6075	17.6053	17.605
5.48	4.56683	5.60974	8.21293	14.2946	17.6496	17.6111	17.6455	17.6433	17.643
5.49	4.58624	5.63423	8.25526	14.3882	17.6876	17.6491	17.6835	17.6813	17.681
5.5	4.60574	5.65884	8.29781	14.4821	17.7256	17.6871	17.7216	17.7193	17.719
5.51	4.62532	5.68355	8.34057	14.5765	17.7636	17.7252	17.7596	17.7573	17.757
5.52	4.64499	5.70838	8.38356	14.6711	17.8016	17.7632	17.7975	17.7953	17.795
5.53	4.66475	5.73331	8.42677	14.7659	17.8396	17.8011	17.8355	17.8333	17.833
5.54	4.68459	5.75835	8.4702	14.8607	17.8776	17.8391	17.8735	17.8712	17.8709
5.55	4.70453	5.7835	8.51386	14.9551	17.9156	17.8771	17.9114	17.9092	17.9089
5.56	4.72456	5.80877	8.55774	15.0483	17.9535	17.915	17.9493	17.9471	17.9468
5.57	4.74467	5.83414	8.60185	15.1386	17.9915	17.953	17.9873	17.9851	17.9847
5.58	4.76488	5.85963	8.64619	15.218	18.0294	17.9909	18.0252	18.023	18.0226
5.59	4.78518	5.88523	8.69075	15.2134	18.0673	18.0288	18.0631	18.0609	18.0605
5.6	4.80556	5.91094	8.73554	15.274	18.1052	18.0667	18.101	18.0987	18.0984
5.61	4.82605	5.93677	8.78057	15.2993	18.1431	18.1046	18.1389	18.1366	18.1363
5.62	4.84662	5.9627	8.82582	15.3529	18.181	18.1425	18.1767	18.1745	18.1742
5.63	4.86728	5.98876	8.87131	15.3788	18.2188	18.1804	18.2146	18.2124	18.212
5.64	4.88804	6.01492	8.91704	15.432	18.2567	18.2182	18.2524	18.2502	18.2498
5.65	4.90889	6.04121	8.96299	15.4576	18.2945	18.2561	18.2903	18.288	18.2877
5.66	4.92984	6.0676	9.00918	15.5114	18.3324	18.2939	18.3281	18.3258	18.3255
5.67	4.95087	6.09412	9.05561	15.5361	18.3702	18.3317	18.3659	18.3636	18.3633
5.68	4.97201	6.12075	9.10228	15.5908	18.408	18.3695	18.4037	18.4014	18.4011
5.69	4.99324	6.14749	9.14918	15.6143	18.4458	18.4073	18.4414	18.4392	18.4389
5.7	5.01456	6.17436	9.19632	15.6703	18.4836	18.4451	18.4792	18.477	18.4766
5.71	5.03598	6.20134	9.2437	15.6924	18.5213	18.4829	18.517	18.5147	18.5144
5.72	5.05749	6.22844	9.29133	15.7499	18.5591	18.5206	18.5547	18.5525	18.5522
5.73	5.07911	6.25566	9.33919	15.7704	18.5968	18.5584	18.5925	18.5902	18.5899
5.74	5.10082	6.283	9.3873	15.8294	18.6346	18.5961	18.6302	18.6279	18.6276
5.75	5.12262	6.31046	9.43565	15.8485	18.6723	18.6339	18.6679	18.6657	18.6653
5.76	5.14453	6.33804	9.48424	15.9089	18.71	18.6716	18.7056	18.7034	18.703
5.77	5.16653	6.36574	9.53308	15.9266	18.7477	18.7093	18.7433	18.7411	18.7407
5.78	5.18863	6.39356	9.58216	15.9883	18.7854	18.747	18.781	18.7787	18.7784
5.79	5.21083	6.4215	9.63148	16.0049	18.8231	18.7847	18.8186	18.8164	18.8161
5.8	5.23313	6.44957	9.68105	16.0678	18.8607	18.8223	18.8563	18.8541	18.8537
5.81	5.25553	6.47776	9.73087	16.0832	18.8984	18.86	18.8939	18.8917	18.8913
5.82	5.27803	6.50607	9.78093	16.1472	18.936	18.8976	18.9316	18.9293	18.929
5.83	5.30063	6.5345	9.83124	16.1616	18.9737	18.9353	18.9692	18.9669	18.9666
5.84	5.32333	6.56306	9.88179	16.2266	19.0113	18.9729	19.0068	19.0045	19.0042
5.85	5.34614	6.59174	9.93259	16.24	19.0489	19.0105	19.0444	19.0421	19.0418
5.86	5.36904	6.62055	9.98364	16.306	19.0865	19.0481	19.082	19.0797	19.0794
5.87	5.39205	6.64949	10.0349	16.3184	19.1241	19.0857	19.1196	19.1173	19.1169
5.88	5.41516	6.67854	10.0864	16.3854	19.1616	19.1232	19.1571	19.1549	19.1545
5.89	5.43838	6.70773	10.1382	16.3969	19.1992	19.1608	19.1947	19.1924	19.192
5.9	5.4617	6.73704	10.1902	16.4648	19.2368	19.1984	19.2322	19.2299	19.2296
5.91	5.48512	6.76648	10.2425	16.4753	19.2743	19.2359	19.2697	19.2675	19.2671
5.92	5.50865	6.79605	10.295	16.5443	19.3118	19.2734	19.3072	19.305	19.3046
5.93	5.53228	6.82574	10.3477	16.5539	19.3493	19.3109	19.3448	19.3425	19.3421
5.94	5.55602	6.85556	10.4006	16.6237	19.3868	19.3485	19.3822	19.38	19.3796
5.95	5.57986	6.88552	10.4537	16.6324	19.4243	19.386	19.4197	19.4175	19.4171
5.96	5.60381	6.9156	10.5071	16.7031	19.4618	19.4234	19.4572	19.4549	19.4546
5.97	5.62786	6.94581	10.5606	16.711	19.4993	19.4609	19.4946	19.4924	19.492
5.98	5.65203	6.97615	10.6144	16.7825	19.5367	19.4984	19.5321	19.5298	19.5295
5.99	5.6763	7.00661	10.6682	16.7895	19.5741	19.5358	19.5695	19.5673	19.5669
6	5.70068	7.03721	10.7223	16.862	19.6116	19.5733	19.607	19.6047	19.6043
6.01	5.72516	7.06795	10.7764	16.8681	19.649	19.6107	19.6444	19.6421	19.6417
6.02	5.74976	7.09881	10.8305	16.9414	19.6864	19.6481	19.6818	19.6795	19.6791
6.03	5.77446	7.1298	10.8846	16.9468	19.7238	19.6855	19.7191	19.7169	19.7165
6.04	5.79927	7.16092	10.9384	17.0208	19.7612	19.7229	19.7565	19.7543	19.7539
6.05	5.8242	7.19218	10.9918	17.0254	19.7986	19.7603	19.7939	19.7916	19.7913
6.06	5.84923	7.22357	11.0441	17.1003	19.8359	19.7976	19.8312	19.829	19.8286
6.07	5.87437	7.25509	11.0937	17.1041	19.8733	19.835	19.8686	19.8663	19.866
6.08	5.89963	7.28674	11.1329	17.1797	19.9106	19.8723	19.9059	19.9036	19.9033
6.09	5.92499	7.31852	11.1295	17.1827	19.9479	19.9096	19.9432	19.941	19.9406
6.1	5.95047	7.35043	11.1595	17.2592	19.9853	19.947	19.9805	19.9783	19.9779
6.11	5.97606	7.38248	11.1848	17.2614	20.0226	19.9843	20.0178	20.0156	20.0152
6.12	6.00176	7.41466	11.2115	17.3387	20.0599	20.0216	20.0551	20.0528	20.0525
6.13	6.02757	7.44697	11.2376	17.3401	20.0971	20.0589	20.0924	20.0901	20.0897
6.14	6.05349	7.4794	11.2639	17.4181	20.1344	20.0961	20.1297	20.1274	20.127
6.15	6.07953	7.51197	11.2901	17.4188	20.1717	20.1334	20.1669	20.1646	20.1643
6.16	6.10568	7.54467	11.3163	17.4976	20.2089	20.1707	20.2041	20.2019	20.2015
6.17	6.13194	7.5775	11.3425	17.4975	20.2462	20.2079	20.2414	20.2391	20.2387
6.18	6.15832	7.61045	11.3688	17.5771	20.2834	20.2451	20.2786	20.2763	20.2759
6.19	6.18481	7.64353	11.395	17.5762	20.3206	20.2823	20.3158	20.3135	20.3132
6.2	6.21141	7.67673	11.4212	17.6565	20.3578	20.3195	20.353	20.3507	20.3503
6.21	6.23813	7.71005	11.4474	17.655	20.395	20.3568	20.3902	20.3879	20.3875
6.22	6.26496	7.74349	11.4736	17.736	20.4322	20.3939	20.4273	20.4251	20.4247
6.23	6.2919	7.77705	11.4999	17.7337	20.4693	20.4311	20.4645	20.4622	20.4618
6.24	6.31895	7.81071	11.5261	17.8155	20.5065	20.4683	20.5017	20.4994	20.499
6.25	6.34612	7.84448	11.5523	17.8125	20.5436	20.5054	20.5388	20.5365	20.5361
6.26	6.3734	7.87835	11.5785	17.895	20.5807	20.5425	20.5759	20.5736	20.5733
6.27	6.40079	7.91231	11.6046	17.8913	20.6179	20.5797	20.613	20.6107	20.6104
6.28	6.4283	7.94634	11.6308	17.9745	20.655	20.6168	20.6501	20.6478	20.6475
6.29	6.45591	7.98043	11.657	17.97	20.6921	20.6539	20.6872	20.6849	20.6846
6.3	6.48363	8.01456	11.6832	18.054	20.7292	20.691	20.7243	20.722	20.7216
6.31	6.51146	8.0487	11.7094	18.0488	20.7662	20.7281	20.7614	20.7591	20.7587
6.32	6.5394	8.08278	11.7356	18.1335	20.8033	20.7651	20.7984	20.7961	20.7958
6.33	6.56744	8.11675	11.7617	18.1281	20.8404	20.8022	20.8355	20.8332	20.8328
6.34	6.59558	8.15046	11.7879	18.2132	20.8774	20.8392	20.8725	20.8702	20.8698
6.35	6.62382	8.18365	11.8141	18.2077	20.9144	20.8763	20.9095	20.9072	20.9069
6.36	6.65215	8.21571	11.8402	18.2931	20.9514	20.9133	20.9465	20.9443	20.9439
6.37	6.68057	8.24461	11.8664	18.2876	20.9885	20.9503	20.9835	20.9812	20.9809
6.38	6.70908	8.25219	11.8926	18.373	21.0254	20.9873	21.0205	21.0182	21.0179
6.39	6.73766	8.24972	11.9187	18.3675	21.0624	21.0243	21.0575	21.0552	21.0548
6.4	6.76631	8.27103	11.9449	18.453	21.0994	21.0613	21.0945	21.0922	21.0918
6.41	6.795	8.28878	11.971	18.4475	21.1364	21.0983	21.1314	21.1291	21.1288
6.42	6.82372	8.30609	11.9972	18.533	21.1733	21.1352	21.1684	21.1661	21.1657
6.43	6.85244	8.32347	12.0233	18.5274	21.2102	21.1721	21.2053	21.203	21.2026
6.44	6.8811	8.34082	12.0494	18.613	21.2472	21.2091	21.2422	21.2399	21.2396
6.45	6.90964	8.35817	12.0756	18.6074	21.2841	21.246	21.2791	21.2768	21.2765
6.46	6.93793	8.37552	12.1017	18.6929	21.321	21.2829	21.316	21.3137	21.3133
6.47	6.96568	8.39285	12.1278	18.6873	21.3579	21.3198	21.3529	21.3506	21.3502
6.48	6.99222	8.41018	12.1539	18.7729	21.3948	21.3567	21.3898	21.3875	21.3871
6.49	7.0149	8.4275	12.1801	18.7673	21.4316	21.3936	21.4266	21.4244	21.424
6.5	7.0128	8.44482	12.2062	18.8529	21.4685	21.4305	21.4635	21.4612	21.4608
6.51	7.03235	8.46212	12.2323	18.8472	21.5053	21.4673	21.5004	21.4981	21.4977
6.52	7.04826	8.47942	12.2584	18.9328	21.5422	21.5041	21.5372	21.5349	21.5345
6.53	7.06277	8.49672	12.2845	18.9272	21.579	21.541	21.574	21.5717	21.5713
6.54	7.0774	8.514	12.3106	19.0128	21.6158	21.5778	21.6108	21.6085	21.6081
6.55	7.09201	8.53128	12.3367	19.0071	21.6526	21.6146	21.6476	21.6453	21.6449
6.56	7.10662	8.54855	12.3628	19.0927	21.6894	21.6514	21.6844	21.6821	21.6817
6.57	7.12121	8.56581	12.3889	19.087	21.7262	21.6882	21.7212	21.7189	21.7185
6.58	7.13581	8.58307	12.415	19.1726	21.763	21.725	21.7579	21.7556	21.7553
6.59	7.1504	8.60032	12.441	19.1669	21.7997	21.7617	21.7947	21.7924	21.792
6.6	7.16498	8.61756	12.4671	19.2525	21.8365	21.7985	21.8314	21.8291	21.8287
6.61	7.17955	8.63479	12.4932	19.2468	21.8732	21.8352	21.8681	21.8659	21.8655
6.62	7.19412	8.65202	12.5193	19.3325	21.9099	21.872	21.9049	21.9026	21.9022
6.63	7.20869	8.66924	12.5453	19.3267	21.9467	21.9087	21.9416	21.9393	21.9389
6.64	7.22325	8.68646	12.5714	19.4124	21.9834	21.9454	21.9783	21.976	21.9756
6.65	7.2378	8.70366	12.5975	19.4065	22.02	21.9821	22.015	22.0127	22.0123
6.66	7.25235	8.72086	12.6235	19.4922	22.0567	22.0188	22.0516	22.0494	22.049
6.67	7.2669	8.73805	12.6496	19.4864	22.0934	22.0554	22.0883	22.086	22.0856
6.68	7.28143	8.75524	12.6756	19.5721	22.1301	22.0921	22.1249	22.1227	22.1223
6.69	7.29597	8.77242	12.7017	19.5663	22.1667	22.1288	22.1616	22.1593	22.1589
6.7	7.31049	8.78959	12.7277	19.652	22.2033	22.1654	22.1982	22.1959	22.1955
6.71	7.32502	8.80675	12.7538	19.6461	22.24	22.202	22.2348	22.2325	22.2322
6.72	7.33953	8.82391	12.7798	19.7319	22.2766	22.2386	22.2715	22.2692	22.2688
6.73	7.35404	8.84106	12.8058	19.726	22.3132	22.2753	22.308	22.3057	22.3054
6.74	7.36855	8.8582	12.8319	19.8117	22.3498	22.3118	22.3446	22.3423	22.3419
6.75	7.38305	8.87534	12.8579	19.8058	22.3863	22.3484	22.3812	22.3789	22.3785
6.76	7.39754	8.89247	12.8839	19.8916	22.4229	22.385	22.4178	22.4155	22.4151
6.77	7.41203	8.90959	12.9099	19.8856	22.4595	22.4216	22.4543	22.452	22.4516
6.78	7.42651	8.92671	12.9359	19.9714	22.496	22.4581	22.4909	22.4886	22.4882
6.79	7.44099	8.94381	12.9619	19.9654	22.5325	22.4947	22.5274	22.5251	22.5247
6.8	7.45546	8.96092	12.9879	20.0513	22.5691	22.5312	22.5639	22.5616	22.5612
6.81	7.46993	8.97801	13.014	20.0452	22.6056	22.5677	22.6004	22.5981	22.5977
6.82	7.48439	8.9951	13.04	20.1311	22.6421	22.6042	22.6369	22.6346	22.6342
6.83	7.49885	9.01218	13.066	20.1251	22.6786	22.6407	22.6734	22.6711	22.6707
6.84	7.5133	9.02925	13.0919	20.2109	22.715	22.6772	22.7099	22.7076	22.7072
6.85	7.52775	9.04632	13.1179	20.2049	22.7515	22.7137	22.7463	22.744	22.7436
6.86	7.54219	9.06338	13.1439	20.2907	22.788	22.7502	22.7828	22.7805	22.7801
6.87	7.55662	9.08043	13.1699	20.2846	22.8244	22.7866	22.8192	22.8169	22.8165
6.88	7.57105	9.09748	13.1959	20.3705	22.8608	22.823	22.8557	22.8534	22.8529
6.89	7.58548	9.11451	13.2218	20.3644	22.8973	22.8595	22.8921	22.8898	22.8894
6.9	7.5999	9.13155	13.2478	20.4503	22.9337	22.8959	22.9285	22.9262	22.9258
6.91	7.61431	9.14857	13.2738	20.4442	22.9701	22.9323	22.9649	22.9626	22.9622
6.92	7.62872	9.16559	13.2997	20.5301	23.0065	22.9687	23.0013	22.999	22.9986
6.93	7.64312	9.1826	13.3257	20.524	23.0429	23.0051	23.0376	23.0353	23.0349
6.94	7.65752	9.19961	13.3517	20.6099	23.0792	23.0415	23.074	23.0717	23.0713
6.95	7.67191	9.2166	13.3776	20.6037	23.1156	23.0778	23.1103	23.108	23.1076
6.96	7.6863	9.2336	13.4036	20.6897	23.1518	23.1142	23.1467	23.1444	23.144
6.97	7.70068	9.25058	13.4295	20.6835	23.1884	23.1505	23.183	23.1807	23.1803
6.98	7.71506	9.26756	13.4555	20.7694	23.2243	23.1868	23.2194	23.217	23.2167
6.99	7.72943	9.28453	13.4814	20.7632	23.2614	23.2232	23.2556	23.2534	23.2528
7	7.7438	9.30149	13.5073	20.8492	23.2963	23.2594	23.292	23.2896	23.2895
7.01	7.75816	9.31845	13.5333	20.8429	23.3351	23.2959	23.3281	23.326	23.3251
7.02	7.77251	9.3354	13.5592	20.929	23.3665	23.3317	23.3648	23.362	23.3626
7.03	7.78686	9.35234	13.5851	20.9227	23.4109	23.3689	23.4002	23.3988	23.3966
7.04	7.80121	9.36928	13.611	21.0087	23.4301	23.4035	23.438	23.4341	23.4368
7.05	7.81555	9.38621	13.6369	21.0024	23.4903	23.4427	23.4714	23.472	23.4651
7.06	7.82988	9.40313	13.6628	21.0884	23.4833	23.4732	23.5126	23.5052	23.5143
7.07	7.84421	9.42005	13.6888	21.0821	23.5614	23.5191	23.5389	23.5468	23.5209
7.08	7.85854	9.43696	13.7147	21.1682	23.5543	23.5342	23.5908	23.572	23.5921
7.09	7.87285	9.45386	13.7406	21.1618	23.6334	23.5986	23.5889	23.6254	23.585
7.1	7.88717	9.47076	13.7664	21.2479	23.6264	23.5916	23.6658	23.619	23.6626
7.11	7.90148	9.48765	13.7923	21.2415	23.7059	23.6693	23.6587	23.6983	23.6555
7.12	7.91578	9.50453	13.8182	21.3276	23.6988	23.6622	23.7374	23.6912	23.7345
7.13	7.93008	9.52141	13.8441	21.3212	23.7785	23.7412	23.7303	23.7708	23.7274
7.14	7.94437	9.53828	13.87	21.4073	23.7714	23.734	23.8097	23.7637	23.8068
7.15	7.95866	9.55514	13.8959	21.4009	23.8511	23.8135	23.8025	23.8434	23.7997
7.16	7.97294	9.572	13.9217	21.487	23.844	23.8064	23.8821	23.8362	23.8793
7.17	7.98722	9.58884	13.9476	21.4805	23.9237	23.886	23.875	23.916	23.8722
7.18	8.00149	9.60569	13.9735	21.5667	23.9165	23.8788	23.9547	23.9088	23.9519
7.19	8.01576	9.62252	13.9993	21.5602	23.9963	23.9585	23.9475	23.9885	23.9447
7.2	8.03002	9.63935	14.0252	21.6463	23.9891	23.9514	24.0272	23.9813	24.0244
7.21	8.04428	9.65618	14.0511	21.6398	24.0688	24.0311	24.02	24.0611	24.0172
7.22	8.05853	9.67299	14.0769	21.726	24.0616	24.0239	24.0997	24.0538	24.0968
7.23	8.07278	9.6898	14.1027	21.7195	24.1413	24.1035	24.0924	24.1335	24.0896
7.24	8.08702	9.7066	14.1286	21.8057	24.134	24.0963	24.1721	24.1263	24.1693
7.25	8.10125	9.7234	14.1544	21.7991	24.2137	24.176	24.1648	24.2059	24.162
7.26	8.11549	9.74019	14.1803	21.8853	24.2064	24.1687	24.2445	24.1987	24.2417
7.27	8.12971	9.75697	14.2061	21.8787	24.286	24.2484	24.2372	24.2783	24.2344
7.28	8.14393	9.77375	14.2319	21.9649	24.2787	24.2411	24.3168	24.271	24.314
7.29	8.15815	9.79052	14.2577	21.9583	24.3584	24.3207	24.3095	24.3506	24.3067
7.3	8.17236	9.80728	14.2836	22.0446	24.351	24.3134	24.3891	24.3433	24.3863
7.31	8.18657	9.82404	14.3094	22.0379	24.4306	24.393	24.3818	24.4229	24.379
7.32	8.20077	9.84079	14.3352	22.1242	24.4233	24.3856	24.4613	24.4155	24.4585
7.33	8.21496	9.85753	14.361	22.1176	24.5028	24.4652	24.454	24.4951	24.4512
7.34	8.22915	9.87427	14.3868	22.2038	24.4955	24.4579	24.5335	24.4877	24.5307
7.35	8.24334	9.891	14.4126	22.1971	24.575	24.5374	24.5261	24.5672	24.5233
7.36	8.25752	9.90772	14.4384	22.2834	24.5676	24.53	24.6056	24.5599	24.6028
7.37	8.27169	9.92444	14.4642	22.2767	24.6471	24.6095	24.5982	24.6393	24.5954
7.38	8.28586	9.94115	14.49	22.363	24.6397	24.6021	24.6777	24.6319	24.6749
7.39	8.30003	9.95786	14.5158	22.3563	24.7191	24.6816	24.6703	24.7114	24.6675
7.4	8.31419	9.97456	14.5415	22.4426	24.7117	24.6742	24.7497	24.704	24.7469
7.41	8.32834	9.99125	14.5673	22.4358	24.7912	24.7536	24.7423	24.7834	24.7395
7.42	8.34249	10.0079	14.5931	22.5221	24.7837	24.7462	24.8217	24.776	24.8189
7.43	8.35664	10.0246	14.6189	22.5154	24.8631	24.8256	24.8143	24.8554	24.8115
7.44	8.37078	10.0413	14.6446	22.6017	24.8557	24.8181	24.8936	24.8479	24.8909
7.45	8.38491	10.0579	14.6704	22.5949	24.935	24.8975	24.8862	24.9273	24.8834
7.46	8.39904	10.0746	14.6961	22.6812	24.9276	24.8901	24.9655	24.9198	24.9627
7.47	8.41317	10.0913	14.7219	22.6744	25.0069	24.9694	24.958	24.9991	24.9553
7.48	8.42729	10.1079	14.7476	22.7608	24.9994	24.9619	25.0374	24.9916	25.0346
7.49	8.4414	10.1245	14.7734	22.7539	25.0787	25.0412	25.0298	25.0709	25.0271
7.5	8.45551	10.1412	14.7991	22.8403	25.0712	25.0337	25.1091	25.0634	25.1064
7.51	8.46962	10.1578	14.8249	22.8334	25.1505	25.113	25.1016	25.1427	25.0988
7.52	8.48372	10.1744	14.8506	22.9198	25.1429	25.1055	25.1809	25.1351	25.1781
7.53	8.49781	10.191	14.8763	22.9129	25.2222	25.1848	25.1733	25.2144	25.1705
7.54	8.5119	10.2076	14.9021	22.9993	25.2146	25.1772	25.2526	25.2068	25.2498
7.55	8.52599	10.2242	14.9278	22.9924	25.2938	25.2565	25.245	25.2861	25.2422
7.56	8.54007	10.2408	14.9535	23.0788	25.2863	25.2489	25.3242	25.2785	25.3214
7.57	8.55414	10.2574	14.9792	23.0719	25.3655	25.3281	25.3166	25.3577	25.3138
7.58	8.56821	10.274	15.0049	23.1583	25.3579	25.3205	25.3958	25.3501	25.393
7.59	8.58228	10.2906	15.0306	23.1513	25.437	25.3997	25.3882	25.4292	25.3854
7.6	8.59634	10.3072	15.0564	23.2377	25.4294	25.3921	25.4673	25.4216	25.4646
7.61	8.61039	10.3237	15.082	23.2308	25.5086	25.4712	25.4597	25.5008	25.4569
7.62	8.62444	10.3403	15.1078	23.3172	25.5009	25.4636	25.5388	25.4931	25.5361
7.63	8.63849	10.3568	15.1332	23.3102	25.58	25.5427	25.5312	25.5722	25.5284
7.64	8.65253	10.3734	15.1594	23.3966	25.5724	25.535	25.6103	25.5646	25.6075
7.65	8.66656	10.3899	15.1842	23.3896	25.6515	25.6142	25.6026	25.6437	25.5998
7.66	8.68059	10.4064	15.2114	23.476	25.6438	25.6065	25.6817	25.636	25.6789
7.67	8.69462	10.423	15.2343	23.469	25.7228	25.6855	25.674	25.715	25.6712
7.68	8.70864	10.4395	15.2647	23.5555	25.7151	25.6778	25.753	25.7073	25.7503
7.69	8.72265	10.456	15.2807	23.5484	25.7942	25.7569	25.7453	25.7864	25.7425
7.7	8.73666	10.4725	15.3205	23.6349	25.7864	25.7492	25.8243	25.7786	25.8216
7.71	8.75067	10.489	15.3159	23.6278	25.8655	25.8282	25.8166	25.8576	25.8138
7.72	8.76467	10.5055	15.3712	23.7142	25.8577	25.8205	25.8956	25.8499	25.8928
7.73	8.77867	10.522	15.3669	23.7071	25.9367	25.8995	25.8878	25.9289	25.8851
7.74	8.79266	10.5384	15.4225	23.7936	25.9289	25.8917	25.9668	25.9211	25.9641
7.75	8.80664	10.5549	15.4179	23.7865	26.0079	25.9707	25.959	26.0001	25.9563
7.76	8.82063	10.5714	15.4739	23.873	26.0001	25.9629	26.038	25.9923	26.0352
7.77	8.8346	10.5878	15.4692	23.8658	26.079	26.0418	26.0302	26.0712	26.0274
7.78	8.84857	10.6043	15.5253	23.9523	26.0712	26.034	26.1091	26.0634	26.1063
7.79	8.86254	10.6207	15.5206	23.9452	26.1501	26.113	26.1013	26.1423	26.0985
7.8	8.8765	10.6372	15.5768	24.0317	26.1423	26.1051	26.1802	26.1345	26.1774
7.81	8.89046	10.6536	15.5721	24.0245	26.2212	26.184	26.1723	26.2134	26.1696
7.82	8.90441	10.67	15.6283	24.111	26.2133	26.1762	26.2512	26.2055	26.2484
7.83	8.91836	10.6865	15.6236	24.1038	26.2922	26.2551	26.2433	26.2844	26.2406
7.84	8.9323	10.7029	15.6798	24.1903	26.2843	26.2472	26.3222	26.2765	26.3194
7.85	8.94624	10.7193	15.6751	24.183	26.3632	26.326	26.3143	26.3553	26.3115
7.86	8.96017	10.7357	15.7313	24.2696	26.3552	26.3181	26.3931	26.3474	26.3904
7.87	8.9741	10.7521	15.7265	24.2623	26.4341	26.397	26.3852	26.4262	26.3824
7.88	8.98802	10.7685	15.7827	24.3489	26.4261	26.389	26.464	26.4183	26.4612
7.89	9.00194	10.7849	15.778	24.3416	26.5049	26.4678	26.4561	26.4971	26.4533
7.9	9.01585	10.8012	15.8341	24.4281	26.497	26.4599	26.5348	26.4891	26.5321
7.91	9.02976	10.8176	15.8294	24.4208	26.5757	26.5387	26.5269	26.5679	26.5241
7.92	9.04366	10.834	15.8856	24.5074	26.5678	26.5307	26.6056	26.56	26.6029
7.93	9.05756	10.8503	15.8808	24.5	26.6465	26.6095	26.5976	26.6387	26.5949
7.94	9.07145	10.8667	15.9369	24.5866	26.6385	26.6015	26.6764	26.6307	26.6736
7.95	9.08534	10.883	15.9322	24.5792	26.7172	26.6802	26.6684	26.7094	26.6656
7.96	9.09923	10.8994	15.9883	24.6658	26.7092	26.6722	26.7471	26.7014	26.7443
7.97	9.11311	10.9157	15.9835	24.6584	26.7879	26.7509	26.739	26.7801	26.7363
7.98	9.12698	10.9321	16.0397	24.745	26.7799	26.7429	26.8177	26.7721	26.815
7.99	9.14085	10.9484	16.0348	24.7376	26.8586	26.8216	26.8097	26.8507	26.807
8	9.15471	10.9647	16.091	24.8242	26.8505	26.8135	26.8883	26.8427	26.8856
8.01	9.16857	10.981	16.0861	24.8168	26.9292	26.8922	26.8803	26.9213	26.8775
8.02	9.18243	10.9973	16.1423	24.9034	26.9211	26.8841	26.9589	26.9133	26.9562
8.03	9.19628	11.0136	16.1374	24.8959	26.9997	26.9628	26.9508	26.9919	26.9481
8.04	9.21013	11.0299	16.1935	24.9825	26.9916	26.9547	27.0294	26.9838	27.0267
8.05	9.22397	11.0462	16.1887	24.975	27.0702	27.0333	27.0213	27.0624	27.0186
8.06	9.2378	11.0625	16.2448	25.0617	27.0621	27.0252	27.0999	27.0543	27.0972
8.07	9.25163	11.0787	16.2399	25.0541	27.1407	27.1038	27.0918	27.1328	27.0891
8.08	9.26546	11.095	16.296	25.1408	27.1325	27.0956	27.1703	27.1247	27.1676
8.09	9.27928	11.1113	16.2911	25.1332	27.2111	27.1742	27.1622	27.2032	27.1595
8.1	9.2931	11.1275	16.3473	25.2199	27.2029	27.166	27.2407	27.1951	27.238
8.11	9.30691	11.1438	16.3423	25.2123	27.2814	27.2446	27.2326	27.2736	27.2298
8.12	9.32072	11.16	16.3985	25.299	27.2733	27.2364	27.3111	27.2654	27.3083
8.13	9.33452	11.1762	16.3935	25.2914	27.3518	27.3149	27.3029	27.3439	27.3001
8.14	9.34832	11.1925	16.4496	25.378	27.3436	27.3067	27.3814	27.3357	27.3786
8.15	9.36211	11.2087	16.4447	25.3704	27.422	27.3852	27.3731	27.4142	27.3704
8.16	9.3759	11.2249	16.5008	25.4571	27.4138	27.377	27.4516	27.406	27.4489
8.17	9.38968	11.2411	16.4958	25.4494	27.4923	27.4555	27.4434	27.4844	27.4407
8.18	9.40346	11.2573	16.5519	25.5361	27.484	27.4472	27.5218	27.4762	27.5191
8.19	9.41724	11.2735	16.5469	25.5284	27.5625	27.5257	27.5136	27.5546	27.5109
8.2	9.43101	11.2897	16.603	25.6151	27.5542	27.5174	27.592	27.5464	27.5893
8.21	9.44477	11.3059	16.598	25.6074	27.6326	27.5958	27.5837	27.6248	27.581
8.22	9.45853	11.3221	16.6541	25.6941	27.6243	27.5876	27.6621	27.6165	27.6594
8.23	9.47229	11.3383	16.6491	25.6864	27.7027	27.6659	27.6538	27.6949	27.6511
8.24	9.48604	11.3544	16.7052	25.7731	27.6944	27.6577	27.7322	27.6866	27.7295
8.25	9.49978	11.3706	16.7002	25.7653	27.7728	27.736	27.7239	27.7649	27.7211
8.26	9.51352	11.3867	16.7562	25.852	27.7644	27.7277	27.8022	27.7566	27.7995
8.27	9.52726	11.4029	16.7512	25.8443	27.8428	27.806	27.7939	27.8349	27.7911
8.28	9.54099	11.419	16.8073	25.931	27.8344	27.7977	27.8722	27.8266	27.8695
8.29	9.55472	11.4352	16.8022	25.9232	27.9127	27.876	27.8638	27.9049	27.8611
8.3	9.56844	11.4513	16.8583	26.0099	27.9044	27.8677	27.9421	27.8965	27.9394
8.31	9.58216	11.4675	16.8532	26.0021	27.9826	27.946	27.9338	27.9748	27.931
8.32	9.59587	11.4835	16.9093	26.0888	27.9743	27.9376	28.012	27.9664	28.0093
8.33	9.60958	11.4998	16.9042	26.081	28.0525	28.0159	28.0036	28.0447	28.0009
8.34	9.62328	11.5155	16.9602	26.1676	28.0441	28.0075	28.0819	28.0363	28.0792
8.35	9.63698	11.5324	16.9551	26.1598	28.1224	28.0857	28.0735	28.1145	28.0708
8.36	9.65067	11.547	17.0112	26.2465	28.1139	28.0773	28.1517	28.1061	28.149
8.37	9.66437	11.5657	17.0061	26.2386	28.1922	28.1555	28.1433	28.1843	28.1405
8.38	9.67805	11.5765	17.0621	26.3253	28.1837	28.1471	28.2215	28.1759	28.2188
8.39	9.69173	11.6006	17.057	26.3174	28.2619	28.2253	28.213	28.254	28.2103
8.4	9.7054	11.5976	17.113	26.4042	28.2534	28.2168	28.2912	28.2456	28.2885
8.41	9.71909	11.6328	17.1079	26.3962	28.3316	28.295	28.2827	28.3238	28.28
8.42	9.73272	11.6293	17.1639	26.4829	28.3231	28.2865	28.3609	28.3153	28.3582
8.43	9.74643	11.6649	17.1588	26.475	28.4013	28.3647	28.3524	28.3934	28.3497
8.44	9.76	11.6614	17.2148	26.5617	28.3927	28.3562	28.4305	28.3849	28.4278
8.45	9.77381	11.6971	17.2096	26.5537	28.4709	28.4343	28.422	28.463	28.4193
8.46	9.78717	11.6935	17.2656	26.6405	28.4623	28.4258	28.5001	28.4545	28.4974
8.47	9.80134	11.7293	17.2604	26.6325	28.5404	28.5039	28.4915	28.5326	28.4888
8.48	9.81398	11.7257	17.3165	26.7192	28.5319	28.4954	28.5696	28.524	28.5669
8.49	9.82939	11.7614	17.3113	26.7112	28.61	28.5735	28.5611	28.6021	28.5584
8.5	9.83945	11.7579	17.3673	26.7979	28.6014	28.5649	28.6391	28.5935	28.6364
8.51	9.85876	11.7936	17.3621	26.7899	28.6794	28.643	28.6305	28.6716	28.6278
8.52	9.85891	11.7901	17.4181	26.8766	28.6708	28.6344	28.7086	28.663	28.7059
8.53	9.88741	11.8258	17.4128	26.8685	28.7489	28.7124	28.7	28.741	28.6973
8.54	9.88444	11.8223	17.4688	26.9552	28.7402	28.7038	28.778	28.7324	28.7753
8.55	9.91416	11.8579	17.4636	26.9471	28.8183	28.7818	28.7694	28.8104	28.7667
8.56	9.91119	11.8544	17.5196	27.0339	28.8096	28.7732	28.8474	28.8018	28.8447
8.57	9.94127	11.89	17.5143	27.0257	28.8876	28.8512	28.8387	28.8798	28.836
8.58	9.93829	11.8865	17.5703	27.1125	28.879	28.8425	28.9167	28.8711	28.914
8.59	9.9685	11.9221	17.565	27.1043	28.9569	28.9205	28.908	28.9491	28.9053
8.6	9.96551	11.9185	17.621	27.1911	28.9482	28.9119	28.986	28.9404	28.9833
8.61	9.99577	11.9542	17.6157	27.1829	29.0262	28.9898	28.9773	29.0184	28.9746
8.62	9.99277	11.9506	17.6717	27.2696	29.0175	28.9811	29.0553	29.0097	29.0526
8.63	10.023	11.9862	17.6664	27.2614	29.0954	29.0591	29.0465	29.0876	29.0438
8.64	10.02	11.9826	17.7224	27.3482	29.0867	29.0503	29.1244	29.0789	29.1217
8.65	10.0503	12.0182	17.7171	27.34	29.1646	29.1283	29.1157	29.1568	29.113
8.66	10.0473	12.0146	17.7731	27.4267	29.1559	29.1195	29.1936	29.148	29.1909
8.67	10.0775	12.0502	17.7677	27.4184	29.2337	29.1974	29.1849	29.2259	29.1822
8.68	10.0745	12.0465	17.8237	27.5052	29.225	29.1886	29.2627	29.2171	29.26
8.69	10.1048	12.0821	17.8184	27.4969	29.3028	29.2665	29.2539	29.295	29.2512
8.7	10.1017	12.0785	17.8743	27.5836	29.294	29.2578	29.3318	29.2862	29.3291
8.71	10.132	12.114	17.869	27.5754	29.3719	29.3356	29.323	29.364	29.3203
8.72	10.1289	12.1104	17.9249	27.6621	29.3631	29.3268	29.4008	29.3552	29.3981
8.73	10.1591	12.1459	17.9196	27.6538	29.4409	29.4046	29.392	29.4331	29.3893
8.74	10.1561	12.1423	17.9755	27.7405	29.4321	29.3958	29.4698	29.4242	29.4671
8.75	10.1863	12.1778	17.9701	27.7322	29.5098	29.4736	29.461	29.502	29.4583
8.76	10.1832	12.1741	18.0261	27.8189	29.501	29.4648	29.5387	29.4932	29.5361
8.77	10.2134	12.2096	18.0207	27.8105	29.5788	29.5425	29.5299	29.5709	29.5272
8.78	10.2104	12.206	18.0766	27.8972	29.5699	29.5337	29.6076	29.5621	29.605
8.79	10.2406	12.2415	18.0712	27.8889	29.6476	29.6114	29.5988	29.6398	29.5961
8.8	10.2375	12.2378	18.1271	27.9755	29.6388	29.6026	29.6765	29.6309	29.6738
8.81	10.2676	12.2732	18.1217	27.9672	29.7165	29.6803	29.6676	29.7087	29.6649
8.82	10.2646	12.2696	18.1776	28.0539	29.7076	29.6714	29.7453	29.6997	29.7426
8.83	10.2947	12.305	18.1722	28.0454	29.7853	29.7491	29.7364	29.7775	29.7337
8.84	10.2916	12.3013	18.2281	28.1321	29.7763	29.7402	29.8141	29.7685	29.8114
8.85	10.3218	12.3367	18.2227	28.1237	29.854	29.8179	29.8051	29.8462	29.8025
8.86	10.3187	12.333	18.2786	28.2104	29.8451	29.8089	29.8828	29.8373	29.8801
8.87	10.3488	12.3684	18.2731	28.2019	29.9227	29.8866	29.8739	29.9149	29.8712
8.88	10.3457	12.3647	18.329	28.2886	29.9138	29.8776	29.9515	29.9059	29.9488
8.89	10.3758	12.4001	18.3235	28.2801	29.9914	29.9553	29.9425	29.9836	29.9398
8.9	10.3727	12.3964	18.3795	28.3668	29.9824	29.9463	30.0201	29.9746	30.0175
8.91	10.4028	12.4318	18.374	28.3583	30.06	30.0239	30.0111	30.0522	30.0085
8.92	10.3997	12.4281	18.4299	28.4449	30.051	30.0149	30.0887	30.0432	30.0861
8.93	10.4298	12.4634	18.4244	28.4364	30.1286	30.0925	30.0797	30.1208	30.077
8.94	10.4267	12.4597	18.4803	28.5231	30.1196	30.0835	30.1573	30.1117	30.1546
8.95	10.4567	12.495	18.4747	28.5145	30.1971	30.1611	30.1483	30.1893	30.1456
8.96	10.4536	12.4913	18.5306	28.6012	30.1881	30.152	30.2258	30.1803	30.2232
8.97	10.4837	12.5266	18.5251	28.5926	30.2656	30.2296	30.2168	30.2578	30.2141
8.98	10.4805	12.5229	18.581	28.6792	30.2565	30.2205	30.2943	30.2487	30.2916
8.99	10.5106	12.5582	18.5754	28.6706	30.3341	30.2981	30.2852	30.3263	30.2825
9	10.5074	12.5544	18.6313	28.7573	30.325	30.289	30.3627	30.3172	30.3601
9.01	10.5375	12.5897	18.6257	28.7486	30.4025	30.3665	30.3536	30.3947	30.351
9.02	10.5343	12.5859	18.6817	28.8353	30.3934	30.3574	30.4311	30.3856	30.4285
9.03	10.5643	12.6212	18.676	28.8266	30.4708	30.4349	30.422	30.463	30.4193
9.04	10.5612	12.6174	18.732	28.9132	30.4617	30.4258	30.4995	30.4539	30.4968
9.05	10.5912	12.6527	18.7263	28.9046	30.5392	30.5032	30.4903	30.5314	30.4876
9.06	10.588	12.6489	18.7822	28.9912	30.53	30.4941	30.5678	30.5222	30.5651
9.07	10.618	12.6842	18.7766	28.9825	30.6075	30.5715	30.5586	30.5997	30.5559
9.08	10.6148	12.6803	18.8325	29.0691	30.5983	30.5624	30.636	30.5905	30.6334
9.09	10.6448	12.7156	18.8268	29.0604	30.6757	30.6398	30.6268	30.6679	30.6242
9.1	10.6417	12.7118	18.8827	29.147	30.6665	30.6306	30.7042	30.6587	30.7016
9.11	10.6716	12.747	18.8771	29.1382	30.7439	30.708	30.695	30.7361	30.6924
9.12	10.6684	12.7432	18.933	29.2248	30.7347	30.6988	30.7724	30.7269	30.7698
9.13	10.6984	12.7784	18.9273	29.216	30.8121	30.7762	30.7632	30.8043	30.7605
9.14	10.6952	12.7745	18.9831	29.3026	30.8028	30.767	30.8406	30.795	30.8379
9.15	10.7252	12.8097	18.9775	29.2938	30.8802	30.8443	30.8313	30.8724	30.8287
9.16	10.7219	12.8059	19.0333	29.3804	30.8709	30.8351	30.9087	30.8631	30.906
9.17	10.7519	12.8411	19.0276	29.3715	30.9483	30.9124	30.8994	30.9405	30.8967
9.18	10.7487	12.8372	19.0835	29.4581	30.939	30.9032	30.9767	30.9312	30.9741
9.19	10.7786	12.8724	19.0778	29.4492	31.0163	30.9805	30.9674	31.0085	30.9648
9.2	10.7754	12.8685	19.1336	29.5358	31.007	30.9712	31.0447	30.9992	31.0421
9.21	10.8053	12.9037	19.1279	29.5269	31.0843	31.0485	31.0354	31.0765	31.0328
9.22	10.8021	12.8998	19.1838	29.6135	31.0749	31.0392	31.1127	31.0672	31.1101
9.23	10.832	12.9349	19.178	29.6046	31.1522	31.1165	31.1034	31.1444	31.1007
9.24	10.8287	12.931	19.2339	29.6911	31.1429	31.1071	31.1806	31.1351	31.178
9.25	10.8587	12.9662	19.2281	29.6822	31.2201	31.1844	31.1713	31.2123	31.1686
9.26	10.8554	12.9623	19.284	29.7687	31.2108	31.175	31.2485	31.203	31.2459
9.27	10.8853	12.9974	19.2782	29.7597	31.288	31.2523	31.2391	31.2802	31.2365
9.28	10.882	12.9935	19.3341	29.8462	31.2786	31.2429	31.3163	31.2708	31.3137
9.29	10.9119	13.0286	19.3283	29.8373	31.3558	31.3201	31.307	31.348	31.3043
9.3	10.9086	13.0246	19.3841	29.9237	31.3464	31.3107	31.3842	31.3386	31.3815
9.31	10.9385	13.0597	19.3783	29.9147	31.4236	31.3879	31.3747	31.4158	31.3721
9.32	10.9352	13.0558	19.4341	30.0012	31.4142	31.3785	31.4519	31.4064	31.4493
9.33	10.9651	13.0909	19.4283	29.9922	31.4913	31.4557	31.4425	31.4836	31.4398
9.34	10.9618	13.0869	19.4841	30.0786	31.4819	31.4462	31.5196	31.4741	31.517
9.35	10.9917	13.122	19.4783	30.0696	31.559	31.5234	31.5102	31.5513	31.5075
9.36	10.9884	13.118	19.5342	30.156	31.5496	31.5139	31.5873	31.5418	31.5847
9.37	11.0182	13.1531	19.5283	30.1469	31.6267	31.5911	31.5778	31.6189	31.5752
9.38	11.0149	13.1491	19.5841	30.2333	31.6172	31.5816	31.6549	31.6094	31.6523
9.39	11.0447	13.1841	19.5783	30.2243	31.6943	31.6587	31.6455	31.6865	31.6428
9.4	11.0414	13.1802	19.6341	30.3106	31.6848	31.6492	31.7225	31.677	31.7199
9.41	11.0712	13.2152	19.6282	30.3015	31.7619	31.7263	31.713	31.7541	31.7104
9.42	11.0679	13.2112	19.684	30.3879	31.7523	31.7168	31.7901	31.7446	31.7875
9.43	11.0977	13.2462	19.6781	30.3788	31.8294	31.7938	31.7806	31.8217	31.7779
9.44	11.0944	13.2422	19.734	30.4651	31.8198	31.7843	31.8576	31.8121	31.855
9.45	11.1242	13.2772	19.728	30.4559	31.8969	31.8614	31.8481	31.8891	31.8454
9.46	11.1209	13.2732	19.7839	30.5424	31.8873	31.8518	31.9251	31.8796	31.9225
9.47	11.1506	13.3082	19.7779	30.5332	31.9643	31.9288	31.9155	31.9566	31.9129
9.48	11.1473	13.3042	19.8337	30.6192	31.9548	31.9192	31.9925	31.947	31.9899
9.49	11.1771	13.3391	19.8278	30.61	32.0318	31.9962	31.9829	32.024	31.9803
9.5	11.1737	13.3351	19.8836	30.6969	32.0221	31.9867	32.0599	32.0144	32.0573
9.51	11.2035	13.3701	19.8776	30.6877	32.0991	32.0636	32.0503	32.0914	32.0477
9.52	11.2001	13.366	19.9335	30.7726	32.0895	32.054	32.1272	32.0817	32.1246
9.53	11.2299	13.401	19.9275	30.7634	32.1664	32.131	32.1176	32.1587	32.115
9.54	11.2265	13.3969	19.9833	30.8524	32.1568	32.1213	32.1945	32.1491	32.1919
9.55	11.2563	13.4318	19.9773	30.8432	32.2337	32.1983	32.1849	32.226	32.1823
9.56	11.2529	13.4278	20.0331	30.9231	32.224	32.1886	32.2618	32.2163	32.2592
9.57	11.2826	13.4627	20.0271	30.9138	32.301	32.2655	32.2521	32.2932	32.2495
9.58	11.2792	13.4587	20.0829	31.0123	32.2913	32.2559	32.329	32.2835	32.3264
9.59	11.309	13.4935	20.0769	31.003	32.3682	32.3328	32.3193	32.3604	32.3167
9.6	11.3056	13.4895	20.1327	31.0571	32.3584	32.3231	32.3962	32.3507	32.3936
9.61	11.3353	13.5243	20.1266	31.0477	32.4353	32.3999	32.3865	32.4276	32.3839
9.62	11.3319	13.5203	20.1824	31.1797	32.4256	32.3902	32.4634	32.4179	32.4607
9.63	11.3616	13.5551	20.1764	31.1704	32.5024	32.4671	32.4536	32.4947	32.451
9.64	11.3582	13.5511	20.2322	31.161	32.4927	32.4573	32.5305	32.485	32.5279
9.65	11.3879	13.5859	20.2261	31.2953	32.5695	32.5342	32.5207	32.5618	32.5181
9.66	11.3845	13.5818	20.2819	31.2859	32.5598	32.5244	32.5975	32.552	32.5949
9.67	11.4141	13.6166	20.2758	31.2765	32.6366	32.6012	32.5877	32.6288	32.5851
9.68	11.4107	13.6125	20.3316	31.4105	32.6268	32.5915	32.6645	32.6191	32.6619
9.69	11.4404	13.6473	20.3255	31.4011	32.7036	32.6683	32.6547	32.6958	32.6521
9.7	11.437	13.6432	20.3813	31.3916	32.6937	32.6585	32.7315	32.686	32.7289
9.71	11.4666	13.678	20.3751	31.5256	32.7705	32.7352	32.7217	32.7628	32.7191
9.72	11.4632	13.6739	20.4309	31.5161	32.7607	32.7254	32.7985	32.753	32.7959
9.73	11.4928	13.7087	20.4248	31.5067	32.8374	32.8022	32.7886	32.8297	32.786
9.74	11.4894	13.7046	20.4806	31.6405	32.8276	32.7923	32.8653	32.8199	32.8627
9.75	11.519	13.7393	20.4744	31.631	32.9043	32.8691	32.8555	32.8966	32.8529
9.76	11.5156	13.7352	20.5302	31.6215	32.8944	32.8592	32.9322	32.8867	32.9296
9.77	11.5452	13.77	20.524	31.7553	32.9711	32.9359	32.9223	32.9634	32.9197
9.78	11.5417	13.7658	20.5798	31.7458	32.9612	32.926	32.999	32.9535	32.9964
9.79	11.5714	13.8006	20.5736	31.7363	33.0379	33.0027	32.9891	33.0302	32.9865
9.8	11.5679	13.7964	20.6294	31.87	33.028	32.9928	33.0658	33.0203	33.0632
9.81	11.5975	13.8311	20.6232	31.8604	33.1047	33.0695	33.0559	33.097	33.0533
9.82	11.594	13.827	20.6789	31.8509	33.0947	33.0596	33.1325	33.087	33.1299
9.83	11.6236	13.8617	20.6727	31.9845	33.1714	33.1362	33.1226	33.1637	33.12
9.84	11.6201	13.8575	20.7285	31.9749	33.1614	33.1263	33.1992	33.1538	33.1966
9.85	11.6497	13.8922	20.7223	31.9653	33.2381	33.2029	33.1893	33.2304	33.1867
9.86	11.6462	13.8881	20.778	32.0989	33.2281	33.193	33.2659	33.2204	33.2633
9.87	11.6758	13.9228	20.7718	32.0892	33.3047	33.2696	33.2559	33.297	33.2533
9.88	11.6723	13.9186	20.8275	32.0796	33.2947	33.2596	33.3325	33.287	33.3299
9.89	11.7019	13.9532	20.8213	32.2131	33.3713	33.3362	33.3225	33.3636	33.3199
9.9	11.6984	13.949	20.877	32.2034	33.3613	33.3262	33.3991	33.3536	33.3965
9.91	11.7279	13.9837	20.8708	32.1938	33.4378	33.4027	33.389	33.4301	33.3865
9.92	11.7244	13.9795	20.9265	32.3272	33.4278	33.3927	33.4656	33.4201	33.463
9.93	11.754	14.0141	20.9202	32.3175	33.5043	33.4693	33.4555	33.4967	33.453
9.94	11.7504	14.0099	20.976	32.3078	33.4943	33.4592	33.5321	33.4866	33.5295
9.95	11.78	14.0446	20.9697	32.4411	33.5708	33.5358	33.522	33.5631	33.5194
9.96	11.7765	14.0404	21.0254	32.4313	33.5607	33.5257	33.5985	33.5531	33.5959
9.97	11.806	14.075	21.0191	32.4216	33.6372	33.6022	33.5884	33.6296	33.5859
9.98	11.8024	14.0707	21.0748	32.5548	33.6271	33.5921	33.6649	33.6195	33.6624
9.99	11.832	14.1053	21.0685	32.545	33.7036	33.6686	33.6548	33.6959	33.6523
10	11.8284	14.1011	21.1242	32.5353	33.6935	33.6585	33.7313	33.6858	33.7287
10.01	11.8579	14.1357	21.1179	32.6684	33.77	33.735	33.7212	33.7623	33.7186
10.02	11.8544	14.1314	21.1736	32.6586	33.7598	33.7249	33.7976	33.7522	33.7951
10.03	11.8839	14.166	21.1672	32.6488	33.8362	33.8013	33.7875	33.8286	33.7849
10.04	11.8803	14.1618	21.223	32.7818	33.8261	33.7912	33.8639	33.8184	33.8613
10.05	11.9098	14.1963	21.2166	32.7719	33.9025	33.8676	33.8537	33.8949	33.8512
10.06	11.9062	14.1921	21.2723	32.7621	33.8923	33.8574	33.9301	33.8847	33.9276
10.07	11.9357	14.2266	21.2659	32.895	33.9687	33.9338	33.92	33.9611	33.9174
10.08	11.9321	14.2223	21.3216	32.8851	33.9586	33.9237	33.9964	33.9509	33.9938
10.09	11.9616	14.2569	21.3152	32.8753	34.0349	34	33.9862	34.0273	33.9836
10.1	11.958	14.2526	21.3709	33.008	34.0247	33.9898	34.0625	34.0171	34.06
10.11	11.9875	14.2871	21.3645	32.9981	34.1011	34.0662	34.0523	34.0934	34.0497
10.12	11.9839	14.2828	21.4202	32.9882	34.0908	34.056	34.1287	34.0832	34.1261
10.13	12.0133	14.3173	21.4138	33.1208	34.1672	34.1323	34.1184	34.1595	34.1159
10.14	12.0097	14.313	21.4695	33.1109	34.1569	34.1221	34.1947	34.1493	34.1922
10.15	12.0392	14.3475	21.4631	33.101	34.2332	34.1984	34.1845	34.2256	34.1819
10.16	12.0356	14.3432	21.5188	33.2335	34.223	34.1881	34.2608	34.2153	34.2582
10.17	12.065	14.3777	21.5123	33.2235	34.2993	34.2644	34.2505	34.2916	34.248
10.18	12.0614	14.3734	21.568	33.2135	34.289	34.2542	34.3268	34.2814	34.3242
10.19	12.0908	14.4078	21.5615	33.3459	34.3652	34.3304	34.3165	34.3576	34.3139
10.2	12.0872	14.4035	21.6172	33.3359	34.3549	34.3201	34.3927	34.3473	34.3902
10.21	12.1166	14.438	21.6107	33.3259	34.4312	34.3964	34.3824	34.4236	34.3799
10.22	12.1129	14.4336	21.6664	33.4581	34.4209	34.3861	34.4587	34.4132	34.4561
10.23	12.1424	14.4681	21.6599	33.4481	34.4971	34.4623	34.4483	34.4895	34.4458
10.24	12.1387	14.4637	21.7156	33.4381	34.4867	34.452	34.5246	34.4791	34.522
10.25	12.1681	14.4982	21.7091	33.5701	34.5629	34.5282	34.5142	34.5553	34.5117
10.26	12.1645	14.4938	21.7647	33.5601	34.5526	34.5179	34.5904	34.545	34.5879
10.27	12.1938	14.5282	21.7582	33.55	34.6288	34.5941	34.58	34.6212	34.5775
10.28	12.1902	14.5239	21.8139	33.6819	34.6184	34.5837	34.6562	34.6108	34.6537
10.29	12.2195	14.5583	21.8073	33.6718	34.6945	34.6599	34.6458	34.687	34.6433
10.3	12.2159	14.5539	21.863	33.6617	34.6841	34.6495	34.722	34.6765	34.7194
10.31	12.2453	14.5883	21.8564	33.7935	34.7603	34.7256	34.7116	34.7527	34.709
10.32	12.2416	14.5839	21.9121	33.7833	34.7499	34.7152	34.7877	34.7423	34.7852
10.33	12.2709	14.6183	21.9055	33.7732	34.826	34.7914	34.7773	34.8184	34.7747
10.34	12.2673	14.6139	21.9612	33.9048	34.8155	34.7809	34.8534	34.808	34.8509
10.35	12.2966	14.6483	21.9546	33.8946	34.8916	34.857	34.8429	34.8841	34.8404
10.36	12.2929	14.6439	22.0102	33.8845	34.8812	34.8466	34.919	34.8736	34.9165
10.37	12.3223	14.6782	22.0036	34.0159	34.9573	34.9227	34.9086	34.9497	34.906
10.38	12.3186	14.6738	22.0593	34.0056	34.9468	34.9122	34.9846	34.9392	34.9821
10.39	12.3479	14.7081	22.0527	33.9954	35.0229	34.9883	34.9741	35.0153	34.9716
10.4	12.3442	14.7037	22.1083	34.1266	35.0123	34.9778	35.0502	35.0048	35.0477
10.41	12.3735	14.738	22.1017	34.1164	35.0884	35.0538	35.0397	35.0808	35.0372
10.42	12.3698	14.7336	22.1573	34.1062	35.0779	35.0433	35.1157	35.0703	35.1132
10.43	12.3991	14.7679	22.1507	34.2372	35.1539	35.1194	35.1052	35.1463	35.1027
10.44	12.3954	14.7635	22.2063	34.2269	35.1434	35.1088	35.1812	35.1358	35.1787
10.45	12.4247	14.7978	22.1996	34.2166	35.2194	35.1848	35.1707	35.2118	35.1681
10.46	12.4209	14.7934	22.2553	34.3475	35.2088	35.1743	35.2467	35.2012	35.2441
10.47	12.4502	14.8276	22.2486	34.3371	35.2848	35.2503	35.2361	35.2772	35.2336
10.48	12.4465	14.8232	22.3042	34.3268	35.2742	35.2397	35.3121	35.2666	35.3095
10.49	12.4758	14.8575	22.2975	34.4574	35.3502	35.3157	35.3015	35.3426	35.2989
10.5	12.472	14.853	22.3532	34.4471	35.3396	35.3051	35.3774	35.332	35.3749
10.51	12.5013	14.8872	22.3465	34.4368	35.4155	35.3811	35.3668	35.408	35.3643
10.52	12.4976	14.8828	22.4021	34.5671	35.4049	35.3704	35.4428	35.3974	35.4402
10.53	12.5268	14.917	22.3954	34.5567	35.4808	35.4464	35.4321	35.4733	35.4296
10.54	12.5231	14.9125	22.451	34.5464	35.4702	35.4357	35.508	35.4626	35.5055
10.55	12.5523	14.9468	22.4442	34.6765	35.5461	35.5117	35.4974	35.5386	35.4949
10.56	12.5485	14.9423	22.4998	34.6661	35.5354	35.501	35.5733	35.5279	35.5708
10.57	12.5778	14.9765	22.4931	34.6557	35.6113	35.5769	35.5626	35.6038	35.5601
10.58	12.574	14.972	22.5487	34.7856	35.6006	35.5662	35.6385	35.5931	35.636
10.59	12.6032	15.0062	22.5419	34.7751	35.6765	35.6421	35.6278	35.669	35.6253
10.6	12.5995	15.0017	22.5975	34.7647	35.6658	35.6314	35.7037	35.6583	35.7012
10.61	12.6287	15.0359	22.5908	34.8943	35.7416	35.7073	35.693	35.7341	35.6904
10.62	12.6249	15.0314	22.6464	34.8838	35.7309	35.6966	35.7688	35.7234	35.7663
10.63	12.6541	15.0656	22.6396	34.8734	35.8068	35.7724	35.7581	35.7992	35.7556
10.64	12.6503	15.0611	22.6952	35.0027	35.796	35.7617	35.8339	35.7885	35.8314
10.65	12.6795	15.0952	22.6884	34.9922	35.8718	35.8375	35.8231	35.8643	35.8206
10.66	12.6757	15.0907	22.744	34.9817	35.861	35.8267	35.8989	35.8535	35.8964
10.67	12.7049	15.1249	22.7371	35.1108	35.9368	35.9025	35.8882	35.9293	35.8857
10.68	12.7011	15.1203	22.7927	35.1003	35.9261	35.8918	35.9639	35.9186	35.9614
10.69	12.7303	15.1545	22.7859	35.0897	36.0018	35.9676	35.9532	35.9943	35.9507
10.7	12.7265	15.1499	22.8415	35.2185	35.991	35.9568	36.0289	35.9835	36.0264
10.71	12.7556	15.184	22.8346	35.2079	36.0668	36.0325	36.0181	36.0593	36.0156
10.72	12.7518	15.1795	22.8902	35.1974	36.056	36.0217	36.0939	36.0485	36.0914
10.73	12.781	15.2136	22.8833	35.3259	36.1317	36.0975	36.083	36.1242	36.0805
10.74	12.7772	15.209	22.9389	35.3153	36.1208	36.0866	36.1587	36.1134	36.1562
10.75	12.8063	15.2432	22.932	35.3047	36.1966	36.1624	36.1479	36.1891	36.1454
10.76	12.8025	15.2386	22.9876	35.4328	36.1857	36.1515	36.2236	36.1782	36.2211
10.77	12.8316	15.2727	22.9807	35.4222	36.2614	36.2272	36.2127	36.2539	36.2102
10.78	12.8278	15.2681	23.0363	35.4116	36.2505	36.2163	36.2884	36.243	36.2859
10.79	12.8569	15.3022	23.0294	35.5394	36.3262	36.292	36.2775	36.3187	36.275
10.8	12.8531	15.2976	23.0849	35.5288	36.3153	36.2811	36.3532	36.3078	36.3507
10.81	12.8822	15.3316	23.078	35.5181	36.3909	36.3568	36.3423	36.3835	36.3398
10.82	12.8783	15.327	23.1335	35.6457	36.38	36.3459	36.4179	36.3725	36.4154
10.83	12.9075	15.3611	23.1266	35.635	36.4556	36.4215	36.407	36.4482	36.4045
10.84	12.9036	15.3565	23.1822	35.6243	36.4447	36.4106	36.4826	36.4372	36.4801
10.85	12.9327	15.3905	23.1752	35.7515	36.5203	36.4862	36.4717	36.5129	36.4692
10.86	12.9288	15.3859	23.2308	35.7407	36.5094	36.4753	36.5473	36.5019	36.5448
10.87	12.9579	15.42	23.2238	35.73	36.5849	36.5509	36.5363	36.5775	36.5338
10.88	12.954	15.4153	23.2793	35.8569	36.574	36.5399	36.6119	36.5665	36.6094
10.89	12.9831	15.4493	23.2724	35.8461	36.6495	36.6155	36.6009	36.6421	36.5985
10.9	12.9792	15.4447	23.3279	35.8354	36.6386	36.6045	36.6764	36.6311	36.674
10.91	13.0083	15.4787	23.3209	35.9619	36.7141	36.6801	36.6654	36.7066	36.663
10.92	13.0044	15.4741	23.3764	35.9511	36.7031	36.6691	36.7411	36.6956	36.7386
10.93	13.0335	15.5081	23.3694	35.9403	36.7786	36.7445	36.7301	36.7713	36.7276
10.94	13.0296	15.5034	23.425	36.0664	36.7676	36.7335	36.8053	36.7603	36.8029
10.95	13.0587	15.5374	23.4179	36.0556	36.8431	36.8092	36.7943	36.8354	36.7919
10.96	13.0547	15.5327	23.4735	36.0448	36.8321	36.7981	36.8704	36.8244	36.8678
10.97	13.0838	15.5667	23.4664	36.1706	36.9075	36.8734	36.8593	36.9006	36.8567
10.98	13.0799	15.562	23.522	36.1597	36.8965	36.8623	36.9336	36.8895	36.9314
10.99	13.1089	15.596	23.5149	36.1489	36.9719	36.9383	36.9225	36.9635	36.9203
11	13.105	15.5913	23.5704	36.2743	36.9609	36.9272	37.0003	36.9524	36.9974
11.01	13.134	15.6252	23.5633	36.2634	37.0363	37.0017	36.9892	37.0308	36.9863
11.02	13.1301	15.6206	23.6189	36.2526	37.0252	36.9906	37.0598	37.0197	37.0583
11.03	13.1591	15.6545	23.6118	36.3776	37.1006	37.0681	37.0486	37.0889	37.0472
11.04	13.1552	15.6498	23.6673	36.3667	37.0895	37.0569	37.1334	37.0778	37.1294
11.05	13.1842	15.6837	23.6602	36.3558	37.1649	37.128	37.1223	37.1648	37.1182
11.06	13.1802	15.679	23.7157	36.4805	37.1537	37.1169	37.1753	37.1536	37.1782
11.07	13.2093	15.7129	23.7086	36.4696	37.2292	37.2007	37.1641	37.2004	37.1671
11.08	13.2053	15.7082	23.7641	36.4586	37.218	37.1895	37.2734	37.1893	37.2679
11.09	13.2343	15.7421	23.757	36.583	37.2932	37.245	37.2622	37.3047	37.2567
11.1	13.2303	15.7374	23.8125	36.572	37.282	37.2338	37.251	37.2935	37.2534
11.11	13.2593	15.7713	23.8053	36.561	37.3578	37.3404	37.3714	37.2823	37.3686
11.12	13.2553	15.7665	23.8608	36.685	37.3466	37.3292	37.3602	37.4015	37.3574
11.13	13.2843	15.8004	23.8536	36.674	37.4211	37.318	37.349	37.3902	37.3462
11.14	13.2803	15.7957	23.9091	36.663	37.4099	37.4393	37.4678	37.379	37.4654
11.15	13.3093	15.8295	23.902	36.7866	37.4868	37.428	37.4566	37.4978	37.4541
11.16	13.3053	15.8248	23.9575	36.7756	37.4756	37.4168	37.4454	37.4866	37.4429
11.17	13.3343	15.8586	23.9503	36.7645	37.5473	37.5356	37.5642	37.4754	37.5617
11.18	13.3303	15.8539	24.0057	36.8878	37.536	37.5244	37.5529	37.5942	37.5504
11.19	13.3592	15.8877	23.9986	36.8768	37.6186	37.5131	37.5416	37.5829	37.5391
11.2	13.3552	15.8829	24.054	36.8657	37.6074	37.6319	37.6604	37.5716	37.6579
11.21	13.3842	15.9168	24.0468	36.9886	37.6646	37.6206	37.6491	37.6904	37.6466
11.22	13.3802	15.912	24.1023	36.9776	37.6533	37.6093	37.6378	37.6791	37.6353
11.23	13.4091	15.9458	24.0951	36.9665	37.7585	37.7281	37.7565	37.6678	37.7541
11.24	13.4051	15.941	24.1505	37.0891	37.7471	37.7167	37.7452	37.7865	37.7427
11.25	13.434	15.9748	24.1433	37.078	37.7358	37.7054	37.7339	37.7751	37.7314
11.26	13.43	15.97	24.1988	37.0668	37.858	37.8242	37.8526	37.7638	37.8501
11.27	13.4589	16.0038	24.1915	37.1891	37.8467	37.8128	37.8413	37.8825	37.8388
11.28	13.4549	15.999	24.2469	37.178	37.8353	37.8015	37.8299	37.8712	37.8274
11.29	13.4838	16.0328	24.2397	37.1668	37.9538	37.9201	37.9486	37.8598	37.9461
11.3	13.4798	16.028	24.2951	37.2888	37.9425	37.9088	37.9372	37.9785	37.9347
11.31	13.5087	16.0617	24.2878	37.2776	37.9311	37.8974	37.9258	37.9671	37.9233
11.32	13.5046	16.0569	24.3433	37.2664	38.0497	38.016	38.0444	37.9557	38.042
11.33	13.5335	16.0907	24.336	37.3882	38.0383	38.0046	38.033	38.0743	38.0306
11.34	13.5295	16.0858	24.3914	37.3769	38.0269	37.9932	38.0216	38.0629	38.0192
11.35	13.5583	16.1196	24.3841	37.3657	38.1455	38.1118	38.1402	38.0515	38.1378
11.36	13.5543	16.1147	24.4396	37.4871	38.1341	38.1004	38.1288	38.1701	38.1263
11.37	13.5831	16.1485	24.4322	37.4759	38.1226	38.089	38.1174	38.1586	38.1149
11.38	13.5791	16.1436	24.4877	37.4647	38.2412	38.2076	38.2359	38.1472	38.2335
11.39	13.608	16.1773	24.4804	37.5858	38.2297	38.1961	38.2244	38.2657	38.222
11.4	13.6039	16.1725	24.5357	37.5746	38.2182	38.1846	38.213	38.2542	38.2105
11.41	13.6327	16.2062	24.5284	37.5633	38.3368	38.3032	38.3315	38.2428	38.3291
11.42	13.6286	16.2013	24.5839	37.6842	38.3253	38.2917	38.32	38.3613	38.3176
11.43	13.6575	16.235	24.5765	37.6729	38.3138	38.2802	38.3085	38.3498	38.3061
11.44	13.6534	16.2301	24.6318	37.6616	38.4323	38.3987	38.427	38.3383	38.4246
11.45	13.6822	16.2638	24.6244	37.7823	38.4208	38.3872	38.4155	38.4568	38.4131
11.46	13.6781	16.2589	24.6802	37.7709	38.4092	38.3757	38.404	38.4453	38.4015
11.47	13.707	16.2926	24.6728	37.7596	38.5277	38.4942	38.5225	38.4337	38.52
11.48	13.7029	16.2877	24.7273	37.8801	38.5162	38.4826	38.5109	38.5522	38.5085
11.49	13.7317	16.3214	24.7199	37.8687	38.5046	38.4711	38.4993	38.5406	38.4969
11.5	13.7276	16.3165	24.7771	37.8573	38.623	38.5895	38.6178	38.529	38.6153
11.51	13.7564	16.3501	24.7697	37.9776	38.6114	38.578	38.6062	38.6475	38.6038
11.52	13.7523	16.3452	24.8212	37.9662	38.5999	38.5664	38.5946	38.6359	38.5922
11.53	13.7811	16.3788	24.8138	37.9548	38.7183	38.6848	38.713	38.6243	38.7106
11.54	13.7769	16.3739	24.8767	38.0749	38.7067	38.6732	38.7014	38.7427	38.699
11.55	13.8057	16.4075	24.8692	38.0635	38.695	38.6616	38.6898	38.7311	38.6874
11.56	13.8016	16.4026	24.9058	38.0521	38.8134	38.78	38.8082	38.7195	38.8058
11.57	13.8304	16.4362	24.8983	38.1719	38.8018	38.7684	38.7966	38.8378	38.7941
11.58	13.8262	16.4313	24.9815	38.1605	38.7901	38.7567	38.7849	38.8262	38.7825
11.59	13.855	16.4649	24.974	38.149	38.9085	38.8751	38.9032	38.8145	38.9008
11.6	13.8509	16.4599	24.9665	38.2688	38.8968	38.8634	38.8916	38.9329	38.8892
11.61	13.8796	16.4935	25.054	38.2573	38.8851	38.8518	38.8799	38.9212	38.8775
11.62	13.8755	16.4886	25.0465	38.2458	39.0034	38.9701	38.9982	38.9095	38.9958
11.63	13.9042	16.5221	25.039	38.3654	38.9917	38.9584	38.9865	39.0278	38.9841
11.64	13.9001	16.5172	25.126	38.3539	38.98	38.9467	38.9748	39.0161	38.9724
11.65	13.9288	16.5508	25.1184	38.3424	39.0983	39.065	39.0931	39.0044	39.0907
11.66	13.9246	16.5458	25.1109	38.4618	39.0866	39.0533	39.0814	39.1227	39.079
11.67	13.9534	16.5793	25.1979	38.4503	39.0749	39.0416	39.0697	39.1109	39.0672
11.68	13.9492	16.5744	25.1903	38.4387	39.1931	39.1598	39.1879	39.0992	39.1855
11.69	13.9779	16.6079	25.1828	38.558	39.1814	39.1481	39.1762	39.2174	39.1737
11.7	13.9738	16.6029	25.2698	38.5465	39.1696	39.1363	39.1644	39.2057	39.162
11.71	14.0025	16.6364	25.2622	38.5349	39.2878	39.2546	39.2826	39.1939	39.2802
11.72	13.9983	16.6315	25.2546	38.6541	39.276	39.2428	39.2708	39.3121	39.2684
11.73	14.027	16.665	25.3416	38.6425	39.2642	39.231	39.2591	39.3003	39.2566
11.74	14.0228	16.66	25.334	38.6309	39.3824	39.3492	39.3772	39.2885	39.3748
11.75	14.0515	16.6935	25.3264	38.7499	39.3706	39.3374	39.3654	39.4067	39.363
11.76	14.0473	16.6885	25.4134	38.7383	39.3588	39.3256	39.3536	39.3949	39.3512
11.77	14.076	16.722	25.4058	38.7267	39.477	39.4438	39.4718	39.3831	39.4694
11.78	14.0718	16.7169	25.3982	38.8457	39.4651	39.4319	39.4599	39.5012	39.4575
11.79	14.1005	16.7504	25.4852	38.834	39.4533	39.4201	39.4481	39.4894	39.4457
11.8	14.0963	16.7454	25.4775	38.8224	39.5714	39.5382	39.5662	39.4775	39.5638
11.81	14.125	16.7789	25.4699	38.9412	39.5595	39.5264	39.5543	39.5956	39.5519
11.82	14.1207	16.7738	25.5569	38.9295	39.5476	39.5145	39.5425	39.5838	39.5401
11.83	14.1494	16.8073	25.5492	38.9179	39.6657	39.6326	39.6606	39.5719	39.6582
11.84	14.1451	16.8022	25.5416	39.0366	39.6538	39.6207	39.6487	39.69	39.6463
11.85	14.1738	16.8357	25.6285	39.0249	39.6419	39.6088	39.6368	39.6781	39.6344
11.86	14.1696	16.8306	25.6209	39.0132	39.76	39.7269	39.7548	39.6662	39.7524
11.87	14.1982	16.8641	25.6132	39.1319	39.7481	39.715	39.7429	39.7842	39.7405
11.88	14.194	16.859	25.7002	39.1202	39.7361	39.7031	39.731	39.7723	39.7286
11.89	14.2226	16.8924	25.6925	39.1084	39.8542	39.8211	39.849	39.7603	39.8466
[truncated: 8,811 more rows]

## Sheet: Fig.2 B3
Time	X1%	X1%	X1%	X1%	X1%	X1%	X1%	X1%	X1%
h
[truncated: 10,001 more rows]

## Sheet: Fig.2 B4
Time	C(H1)	C(H1)	C(H1)	C(H1)	C(H1)	C(H1)	C(H1)	C(H1)	C(H1)
[truncated: 10,002 more rows]

[truncated: 22 more sheets: Fig.2 C2, Fig.2 C3, Fig.2 C4, Fig.2 C5, Fig.3 C, Fig.3 D, Fig.4 A,C, Fig.4 B, Fig.4 D, Fig.4 E, Fig.4 F, Fig.5 B, Fig.5 C, Fig.6 A, Fig.6 B, Fig.6 C, Fig.6 D, Fig.7 A, Fig.7 C, Fig.7 D …]
